# Supplementary material for: Silver-catalyzed regioselective 1,6-hydroarylation of para-quinone methides with anilines and phenols
Source: Royal Society of Chemistry journal article supplement (doi:10.1039/d2qo00541g), 2022-01-01

## Supporting Information

### Silver-Catalyzed Regioselective 1,6-Hydroarylation of *para*-Quinone Methides with Anilines and Phenols

Biquan Xiong,<sup>a,b,†</sup> Shipan Xu,<sup>a,†</sup> Weifeng Xu,<sup>a</sup> Yu Liu,<sup>a</sup> Limin Zhang,<sup>b</sup> Ke-Wen  
Tang,<sup>\*a</sup> Shuang-Feng Yin,<sup>\*c</sup> and Wai-Yeung Wong<sup>\*b</sup>

<sup>a</sup> Department of Chemistry and Chemical Engineering, Hunan Institute of Science and Technology, Yueyang,  
414006, P. R. China.

<sup>b</sup> Department of Applied Biology and Chemical Technology, The Hong Kong Polytechnic University, Hung Hom,  
Hong Kong, P. R. China.

<sup>c</sup> Advanced Catalytic Engineering Research Center of the Ministry of Education, State Key Laboratory of  
Chemo/Biosensing and Chemometrics, College of Chemistry and Chemical Engineering, Hunan University,  
Changsha 410082, Hunan Province, P. R. China.

\* To whom corresponding should be addressed: Fax: +86-730-8640921;  
E-mail: tangkewen@sina.com (Prof. K.-W. Tang); sf\_yin@hnu.edu.cn. (Prof. S.-F. Yin); wai-  
yeung.wong@polyu.edu.hk (Prof. W.-Y. Wong)

<sup>†</sup> Dr. B. Xiong and S. Xu contributed equally to this work.

## Table of contents

|    |                                                                                            |          |
|----|--------------------------------------------------------------------------------------------|----------|
| 1. | Reaction optimization                                                                      | S2-5     |
| 2. | General considerations                                                                     | S5       |
| 3. | Crystallographic data                                                                      | S6-9     |
| 4. | Analytical data for the compounds                                                          | S9-38    |
| 5. | Copies of $^1\text{H}$ , $^{13}\text{C}$ , $^{31}\text{P}$ and $^{19}\text{F}$ NMR spectra | S39-167  |
| 6. | Copies of HPLC spectra                                                                     | S167-168 |

## Reaction optimization:

**Table S1.** Optimization of solvent. <sup>a</sup>

| Entry    | Solvent                         | Catalyst                | Temp.        | Yield <sup>b</sup> |
|----------|---------------------------------|-------------------------|--------------|--------------------|
| <b>1</b> | <b>DCE</b>                      | <b>AgBF<sub>4</sub></b> | <b>80 °C</b> | <b>87%</b>         |
| 2        | CH <sub>2</sub> Cl <sub>2</sub> | AgBF <sub>4</sub>       | 80 °C        | 77%                |
| 3        | DMF                             | AgBF <sub>4</sub>       | 80 °C        | 44%                |
| 4        | CH <sub>3</sub> CN              | AgBF <sub>4</sub>       | 80 °C        | trace              |
| 5        | 1,4-Dioxane                     | AgBF <sub>4</sub>       | 80 °C        | 55%                |
| 6        | H <sub>2</sub> O                | AgBF <sub>4</sub>       | 80 °C        | N.D.               |
| 7        | Toluene                         | AgBF <sub>4</sub>       | 80 °C        | 33%                |
| 8        | THF                             | AgBF <sub>4</sub>       | 80 °C        | 31%                |

<sup>a</sup> Reactions were operated with aniline (0.2 mmol), 4-benzylidene-2,6-di-*tert*-butylcyclohexa-2,5-dienone (0.2 mmol), catalyst (10 mol%) and solvent (1.0 mL) under N<sub>2</sub> conditions. <sup>b</sup> Yield was determined by GC analysis, and dodecane was used as the internal standard.

**Table S2.** Optimization of additive. <sup>a</sup>

| Entry    | Solvent    | Additive                       | Catalyst                | Temp.        | Yield <sup>b</sup> |
|----------|------------|--------------------------------|-------------------------|--------------|--------------------|
| <b>1</b> | <b>DCE</b> | <b>-</b>                       | <b>AgBF<sub>4</sub></b> | <b>80 °C</b> | <b>87%</b>         |
| 2        | DCE        | Et <sub>3</sub> N              | AgBF <sub>4</sub>       | 80 °C        | trace              |
| 3        | DCE        | K <sub>3</sub> PO <sub>4</sub> | AgBF <sub>4</sub>       | 80 °C        | 13%                |
| 4        | DCE        | NaOAc                          | AgBF <sub>4</sub>       | 80 °C        | 17%                |
| 5        | DCE        | PhCOOH                         | AgBF <sub>4</sub>       | 80 °C        | 73%                |
| 6        | DCE        | Ph <sub>2</sub> P(O)OH         | AgBF <sub>4</sub>       | 80 °C        | 79%                |

<sup>a</sup> Reactions were operated with aniline (0.2 mmol), 4-benzylidene-2,6-di-*tert*-butylcyclohexa-2,5-dienone (0.2 mmol), additive (10 mol%), catalyst (10 mol%) and solvent (1.0 mL) under N<sub>2</sub> conditions. <sup>b</sup> Yield was determined by GC analysis, and dodecane was used as the internal standard.

**Table S3.** Optimization of the amount of AgBF<sub>4</sub>. <sup>a</sup>

| Entry | Solvent | Catalyst          | Temp. | Yield <sup>b</sup> |
|-------|---------|-------------------|-------|--------------------|
| 1     | DCE     | AgBF <sub>4</sub> | 80 °C | 11% <sup>c</sup>   |

|          |            |                         |              |                  |
|----------|------------|-------------------------|--------------|------------------|
| 2        | DCE        | AgBF <sub>4</sub>       | 80 °C        | 33% <sup>d</sup> |
| 3        | DCE        | AgBF <sub>4</sub>       | 80 °C        | 66% <sup>e</sup> |
| <b>4</b> | <b>DCE</b> | <b>AgBF<sub>4</sub></b> | <b>80 °C</b> | <b>87%</b>       |
| 5        | DCE        | AgBF <sub>4</sub>       | 80 °C        | 88% <sup>f</sup> |

<sup>a</sup> Reactions were operated with aniline (0.2 mmol), 4-benzylidene-2,6-di-*tert*-butylcyclohexa-2,5-dienone (0.2 mmol), catalyst (10 mol%) and solvent (1.0 mL) under N<sub>2</sub> conditions. <sup>b</sup> Yield was determined by GC analysis, and dodecane was used as the internal standard. <sup>c</sup> AgBF<sub>4</sub> (1 mol%) <sup>d</sup> AgBF<sub>4</sub> (2 mol%), <sup>e</sup> AgBF<sub>4</sub> (5 mol%), <sup>f</sup> AgBF<sub>4</sub> (20 mol%).

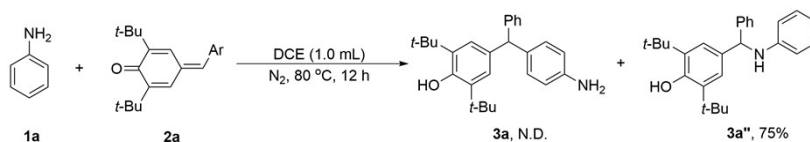

**Scheme S1.** 1,6-conjugated addition of **1a** to **2a**.

**Table S4.** Optimization of additive. <sup>a</sup>

| Entry    | Solvent    | Additive                       | Catalyst                | Temp.       | Yield <sup>b</sup> |
|----------|------------|--------------------------------|-------------------------|-------------|--------------------|
| 1        | DCE        | E <sub>3</sub> N               | AgBF <sub>4</sub>       | R.T.        | trace              |
| 2        | DCE        | DIEA                           | AgBF <sub>4</sub>       | R.T.        | trace              |
| 3        | DCE        | DBU                            | AgBF <sub>4</sub>       | R.T.        | trace              |
| 4        | DCE        | K <sub>3</sub> PO <sub>4</sub> | AgBF <sub>4</sub>       | R.T.        | 38%                |
| 5        | DCE        | NaOAc                          | AgBF <sub>4</sub>       | R.T.        | 35%                |
| 6        | DCE        | PhCOOH                         | AgBF <sub>4</sub>       | R.T.        | 84%                |
| <b>7</b> | <b>DCE</b> | <b>Ph<sub>2</sub>P(O)OH</b>    | <b>AgBF<sub>4</sub></b> | <b>R.T.</b> | <b>91%</b>         |
| 8        | DCE        | TfOH                           | AgBF <sub>4</sub>       | R.T.        | 81%                |
| 9        | DCE        | HBf <sub>4</sub>               | AgBF <sub>4</sub>       | R.T.        | 86%                |
| 10       | DCE        | TsOH                           | AgBF <sub>4</sub>       | R.T.        | 83%                |
| 22       | DCE        | CF <sub>3</sub> COOH           | AgBF <sub>4</sub>       | R.T.        | 84%                |

<sup>a</sup> Reactions were operated with phenol (0.2 mmol), 4-benzylidene-2,6-di-*tert*-butylcyclohexa-2,5-dienone (0.2 mmol), additive (10 mol%), catalyst (10 mol%) and solvent (1.0 mL) under N<sub>2</sub> atmosphere. <sup>b</sup> Yield was determined by GC analysis, and dodecane was used as the internal standard.

**Table S5.** Optimization of the amount of Ph<sub>2</sub>P(O)OH. <sup>a</sup>

| Entry    | Solvent    | Additive                    | Catalyst                | Temp.       | Yield <sup>b</sup> |
|----------|------------|-----------------------------|-------------------------|-------------|--------------------|
| 1        | DCE        | Ph <sub>2</sub> P(O)OH      | AgBF <sub>4</sub>       | R.T.        | 86% <sup>c</sup>   |
| 2        | DCE        | Ph <sub>2</sub> P(O)OH      | AgBF <sub>4</sub>       | R.T.        | 88% <sup>d</sup>   |
| 3        | DCE        | Ph <sub>2</sub> P(O)OH      | AgBF <sub>4</sub>       | R.T.        | 89% <sup>e</sup>   |
| <b>4</b> | <b>DCE</b> | <b>Ph<sub>2</sub>P(O)OH</b> | <b>AgBF<sub>4</sub></b> | <b>R.T.</b> | <b>91%</b>         |



|   |     |                        |                   |      |                  |
|---|-----|------------------------|-------------------|------|------------------|
| 5 | DCE | Ph <sub>2</sub> P(O)OH | AgBF <sub>4</sub> | R.T. | 90% <sup>f</sup> |
|---|-----|------------------------|-------------------|------|------------------|

<sup>a</sup> Reactions were operated with phenol (0.2 mmol), 4-benzylidene-2,6-di-*tert*-butylcyclohexa-2,5-dienone (0.2 mmol), additive (10 mol%), catalyst (10 mol%) and solvent (1.0 mL) under N<sub>2</sub> atmosphere. <sup>b</sup> Yield was determined by GC analysis, and dodecane was used as the internal standard. <sup>c</sup> Ph<sub>2</sub>P(O)OH (1 mol%), <sup>d</sup> Ph<sub>2</sub>P(O)OH (2 mol%), <sup>e</sup> Ph<sub>2</sub>P(O)OH (5 mol%), <sup>f</sup> Ph<sub>2</sub>P(O)OH (20 mol%).

**Table S6.** Optimization of the amount of AgBF<sub>4</sub>. <sup>a</sup>

| Entry | Solvent    | Additive                    | Catalyst                | Temp.       | Yield <sup>b</sup> |
|-------|------------|-----------------------------|-------------------------|-------------|--------------------|
| 1     | DCE        | Ph <sub>2</sub> P(O)OH      | AgBF <sub>4</sub>       | R.T.        | 24% <sup>c</sup>   |
| 2     | DCE        | Ph <sub>2</sub> P(O)OH      | AgBF <sub>4</sub>       | R.T.        | 45% <sup>d</sup>   |
| 3     | <b>DCE</b> | <b>Ph<sub>2</sub>P(O)OH</b> | <b>AgBF<sub>4</sub></b> | <b>R.T.</b> | <b>91%</b>         |
| 4     | DCE        | Ph <sub>2</sub> P(O)OH      | AgBF <sub>4</sub>       | R.T.        | 68% <sup>e</sup>   |
| 5     | DCE        | Ph <sub>2</sub> P(O)OH      | AgBF <sub>4</sub>       | R.T.        | 90% <sup>f</sup>   |

<sup>a</sup> Reactions were operated with phenol (0.2 mmol), 4-benzylidene-2,6-di-*tert*-butylcyclohexa-2,5-dienone (0.2 mmol), additive (10 mol%), catalyst (10 mol%) and solvent (1.0 mL) under N<sub>2</sub> atmosphere. <sup>b</sup> Yield was determined by GC analysis, and dodecane was used as the internal standard. <sup>c</sup> AgBF<sub>4</sub> (1 mol%), <sup>d</sup> AgBF<sub>4</sub> (2 mol%), <sup>e</sup> AgBF<sub>4</sub> (5 mol%), <sup>f</sup> AgBF<sub>4</sub> (20 mol%).

**Table S7.** Optimization of solvent. <sup>a</sup>

| Entry | Solvent            | Additive                    | Catalyst                | Temp.       | Yield <sup>b</sup> |
|-------|--------------------|-----------------------------|-------------------------|-------------|--------------------|
| 1     | <b>DCE</b>         | <b>Ph<sub>2</sub>P(O)OH</b> | <b>AgBF<sub>4</sub></b> | <b>R.T.</b> | <b>91%</b>         |
| 2     | DCM                | Ph <sub>2</sub> P(O)OH      | AgBF <sub>4</sub>       | R.T.        | 81%                |
| 3     | DMF                | Ph <sub>2</sub> P(O)OH      | AgBF <sub>4</sub>       | R.T.        | 76%                |
| 4     | CH <sub>3</sub> CN | Ph <sub>2</sub> P(O)OH      | AgBF <sub>4</sub>       | R.T.        | trace              |
| 5     | 1,4-dioxane        | Ph <sub>2</sub> P(O)OH      | AgBF <sub>4</sub>       | R.T.        | 45%                |
| 6     | H <sub>2</sub> O   | Ph <sub>2</sub> P(O)OH      | AgBF <sub>4</sub>       | R.T.        | N.D.               |
| 7     | Toluene            | Ph <sub>2</sub> P(O)OH      | AgBF <sub>4</sub>       | R.T.        | 69%                |
| 8     | THF                | Ph <sub>2</sub> P(O)OH      | AgBF <sub>4</sub>       | R.T.        | 67%                |
| 9     | DME                | Ph <sub>2</sub> P(O)OH      | AgBF <sub>4</sub>       | R.T.        | trace              |
| 10    | DMSO               | Ph <sub>2</sub> P(O)OH      | AgBF <sub>4</sub>       | R.T.        | N.D.               |

<sup>a</sup> Reactions were operated with phenol (0.2 mmol), 4-benzylidene-2,6-di-*tert*-butylcyclohexa-2,5-dienone (0.2 mmol), additive (10 mol%), catalyst (10 mol%) and solvent (1.0 mL) under N<sub>2</sub> atmosphere. <sup>b</sup> Yield was determined by GC analysis, and dodecane was used as the internal standard.

**Table S8.** Optimization of atmosphere. <sup>a</sup>

| Entry | Solvent | Additive | Catalyst | Temp. | Yield <sup>b</sup> |
|-------|---------|----------|----------|-------|--------------------|
|-------|---------|----------|----------|-------|--------------------|

|   |     |                        |                   |      |                  |
|---|-----|------------------------|-------------------|------|------------------|
| 1 | DCE | Ph <sub>2</sub> P(O)OH | AgBF <sub>4</sub> | R.T. | 91%              |
| 2 | DCE | Ph <sub>2</sub> P(O)OH | AgBF <sub>4</sub> | R.T. | 66% <sup>c</sup> |

<sup>a</sup> Reactions were operated with phenol (0.2 mmol), 4-benzylidene-2,6-di-*tert*-butylcyclohexa-2,5-dienone (0.2 mmol), additive (10 mol%), catalyst (10 mol%) and solvent (1.0 mL) under N<sub>2</sub> atmosphere. <sup>b</sup> Yield was determined by GC analysis, and dodecane was used as the internal standard. <sup>c</sup> air atmosphere.

## General considerations:

All solvents used in the reactions were freshly distilled. The other reagents were recrystallized or distilled as necessary. All reactions were performed under an atmosphere of N<sub>2</sub> unless specified otherwise. <sup>1</sup>H (400 MHz), <sup>13</sup>C (100 MHz), <sup>31</sup>P (160 MHz) and <sup>19</sup>F (376 MHz) NMR spectra were recorded on a 400 MHz spectrometer in CDCl<sub>3</sub>. <sup>1</sup>H NMR chemical shifts were reported using TMS as internal standard while <sup>13</sup>C NMR chemical shifts were reported relative to CDCl<sub>3</sub>. The electron ionization method was used for HRMS measurements, and the mass analyzer type was double-focusing.

### General procedure for 1,6-hydroarylation of *p*-QMs with anilines:

A mixture of anilines (0.2 mmol), *p*-QMs compounds (0.2 mmol) and AgBF<sub>4</sub> (10 mol %) were dissolved in DCE (1.0 mL) under a N<sub>2</sub> atmosphere and the mixture was stirred for 12.0 h at 80 °C. Upon completion of the reaction, the mixture was concentrated under vacuum. Removal of the solvent under a reduced pressure gave the crude product; pure product was obtained by passing the crude product through a short silica gel column using hexane/EtOAc (10:1-2:1) as eluent.

### General procedure for 1,6-hydroarylation of *p*-QMs with phenols:

A mixture of phenols (0.2 mmol), *p*-QMs compounds (0.2 mmol), Ph<sub>2</sub>P(O)OH (10 mol %) and AgBF<sub>4</sub> (10 mol %) were dissolved in DCE (1.0 mL) under a N<sub>2</sub> atmosphere and the mixture was stirred for 12.0 h at room temperature. Upon completion of the reaction, the mixture was concentrated under vacuum. Removal of the solvent under a reduced pressure gave the crude product; pure product was obtained by passing the crude product through a short silica gel column using hexane/EtOAc (10:1-2:1) as eluent.

## Crystallographic data

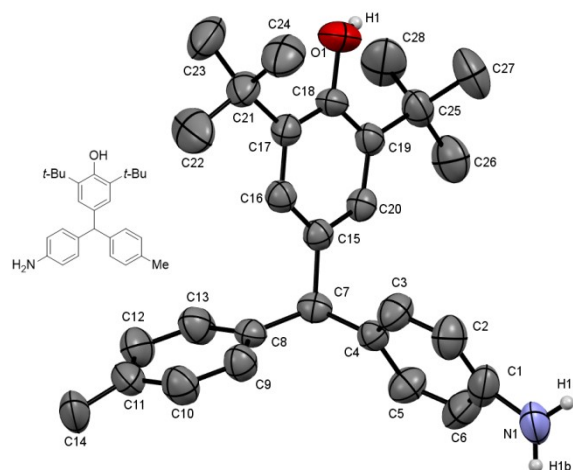

**Figure S1.** ORTEP drawing (a thermal ellipsoid plot) of compound **4a**.

Hydrogen atoms are omitted for clarity; ellipsoids are drawn at 50% probability.

**Table S9.** Crystal data and structure refinement for **4a**

|                              |                                        |
|------------------------------|----------------------------------------|
| Identification code          | <b>4a</b>                              |
| CCDC                         | 2144010                                |
| Empirical formula            | C <sub>28</sub> H <sub>35</sub> NO     |
| Formula weight               | 401.57                                 |
| Temperature/K                | 298(2)                                 |
| Crystal description          | block                                  |
| Space group                  | P-1                                    |
| a/Å                          | 9.8041(11)                             |
| b/Å                          | 10.9905(12)                            |
| c/Å                          | 11.7996(14)                            |
| α/°                          | 83.266(2)                              |
| β/°                          | 79.515(1)                              |
| γ/°                          | 87.061(3)                              |
| Volume/Å <sup>3</sup>        | 1241.0(2)                              |
| Z                            | 2                                      |
| ρ calcd/cm <sup>3</sup>      | 1.075                                  |
| μ/mm <sup>-1</sup>           | 0.064                                  |
| F(000)                       | 436.168                                |
| Crystal size/mm <sup>3</sup> | 0.40 × 0.30 × 0.21                     |
| Radiation                    | MoKα (λ = 0.71073)                     |
| Index ranges                 | -11 ≤ h ≤ 11, -12 ≤ k ≤ 13, 0 ≤ l ≤ 13 |

|                                         |                                                                  |
|-----------------------------------------|------------------------------------------------------------------|
| Reflections collected                   | 7762                                                             |
| Independent reflections                 | 4276 [ $R_{\text{int}} = 0.0421$ , $R_{\text{sigma}} = 0.0768$ ] |
| Data/restraints/parameters              | 4276/0/282                                                       |
| Goodness-of-fit on $F_2$                | 1.058                                                            |
| Final R indexes [ $I \geq 2\sigma(I)$ ] | $R_1 = 0.0603$ , $wR_2 = 0.1507$                                 |
| Final R indexes [all data]              | $R_1 = 0.1073$ , $wR_2 = 0.1784$                                 |

## Experimental:

Single crystals of  $C_{28}H_{35}NO$  (**4a**) were obtained by slow evaporation from its saturated solution of dichloromethane/n-hexane at room temperature. Suitable single crystals were selected for indexing, and intensity data were measured on a Siemens Smart CCD diffractometer with graphite-monochromated  $MoK\alpha$  radiation ( $\lambda = 0.71073 \text{ \AA}$ ) at 298(2) K. The raw data frames were integrated into SHELX format reflection files and corrected using SAINT program. Absorption corrections based on multiscan were obtained by the SADABS program. The structure was solved by direct methods and refined with fullmatrix least-squares technique using the ShelXL (Sheldrick, 2015) and ShelXT (Sheldrick, 2015) programs, respectively.

### Crystal structure determination of **4a**:

Crystal Data for  $C_{28}H_{35}NO$  ( $M = 401.57 \text{ g/mol}$ ): triclinic, space group P-1,  $a = 9.8041(11) \text{ \AA}$ ,  $b = 10.9905(12) \text{ \AA}$ ,  $c = 11.7996(14) \text{ \AA}$ ,  $V = 1241.0(2) \text{ \AA}^3$ ,  $Z = 2$ ,  $T = 298(2) \text{ K}$ ,  $\mu(MoK\alpha) = 0.71073 \text{ mm}^{-1}$ ,  $D_{\text{calc}} = 1.075 \text{ g/cm}^3$ , 7762 reflections measured, 4276 unique ( $R_{\text{int}} = 0.0421$ ,  $R_{\text{sigma}} = 0.0768$ ) which were used in all calculations. The final  $R_1$  was 0.0603 ( $I > 2\sigma(I)$ ) and  $wR_2$  was 0.1784 (all data).

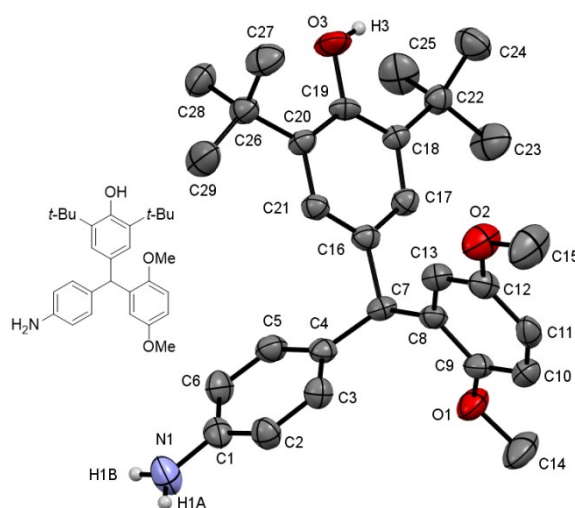

**Figure S2.** ORTEP drawing (a thermal ellipsoid plot) of compound **4j**.

Hydrogen atoms are omitted for clarity; ellipsoids are drawn at 50% probability.

**Table S10.** Crystal data and structure refinement for **4j**

|                                   |                                                               |
|-----------------------------------|---------------------------------------------------------------|
| Identification code               | <b>4j</b>                                                     |
| CCDC                              | 2144013                                                       |
| Empirical formula                 | C <sub>29</sub> H <sub>37</sub> NO <sub>3</sub>               |
| Formula weight                    | 447.60                                                        |
| Temperature/K                     | 298(2)                                                        |
| Crystal description               | block                                                         |
| Space group                       | P2(1)/c                                                       |
| a/Å                               | 9.9675(11)                                                    |
| b/Å                               | 12.6997(13)                                                   |
| c/Å                               | 20.234(2)                                                     |
| α/°                               | 90.00                                                         |
| β/°                               | 101.754(3)                                                    |
| γ/°                               | 90.00                                                         |
| Volume/Å <sup>3</sup>             | 2507.6(5)                                                     |
| Z                                 | 4                                                             |
| ρ calcd/cm <sup>3</sup>           | 1.186                                                         |
| μ/mm <sup>-1</sup>                | 0.076                                                         |
| F(000)                            | 968                                                           |
| Crystal size/mm <sup>3</sup>      | 0.25 * 0.20 * 0.12                                            |
| Radiation                         | MoKα (λ = 0.71073)                                            |
| Index ranges                      | <b>-11 ≤ h ≤ 8, -15 ≤ k ≤ 11, -24 ≤ l ≤ 21</b>                |
| Reflections collected             | 11864                                                         |
| Independent reflections           | 4418 [R <sub>int</sub> = 0.0940, R <sub>sigma</sub> = 0.1251] |
| Data/restraints/parameters        | 4418/0/308                                                    |
| Goodness-of-fit on F <sub>2</sub> | 1.091                                                         |
| Final R indexes [I ≥ 2σ (I)]      | R <sub>1</sub> = 0.0747, wR <sub>2</sub> = 0.1607             |
| Final R indexes [all data]        | R <sub>1</sub> = 0.1518, wR <sub>2</sub> = 0.1828             |

### Experimental:

Single crystals of C<sub>29</sub>H<sub>37</sub>NO<sub>3</sub> (**4j**) were obtained by slow evaporation from its saturated solution of dichloromethane/n-hexane at room temperature. Suitable single crystals were selected for indexing, and intensity data were measured on a Siemens Smart CCD diffractometer with graphite-monochromated MoKα radiation (λ = 0.71073 Å) at 298(2) K. The raw data frames were integrated into SHELX format reflection files and corrected using SAINT program. Absorption corrections based on multiscan were obtained by the SADABS program. The structure was solved by direct methods and refined with fullmatrix least-squares technique using the ShelXL (Sheldrick, 2015) and ShelXT (Sheldrick, 2015) programs, respectively.

Crystal structure determination of **4j**:

Crystal Data for C<sub>29</sub>H<sub>37</sub>NO<sub>3</sub> (M = 447.60 g/mol): monoclinic, space group P2(1)/c, a = 9.9675(11) Å, b = 12.6997(13) Å, c = 20.234(2) Å, V = 2507.6(5) Å<sup>3</sup>, Z = 4, T =

298(2) K,  $\mu(\text{MoK}\alpha) = 0.71073 \text{ mm}^{-1}$ ,  $D_{\text{calc}} = 1.186 \text{ g/cm}^3$ , 11864 reflections measured, 4418 unique ( $R_{\text{int}} = 0.0940$ ,  $R_{\text{sigma}} = 0.1251$ ) which were used in all calculations. The final  $R_1$  was 0.0747 ( $I > 2\sigma(I)$ ) and  $wR_2$  was 0.1828 (all data).

## Analytical data for the compounds

### 4-((4-Aminophenyl)(phenyl)methyl)-2,6-di-*tert*-butylphenol (3a)

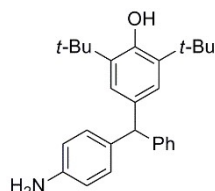

According to the general procedure, work-up and flash column chromatography (Hexane/EtOAc: 10:1) gave product **3a** (68.9 mg, 0.17 mmol, 85%) as a yellow solid. mp: 108.1-108.5 °C.  $^1\text{H}$  NMR (400 MHz,  $\text{CDCl}_3$ , 25 °C, TMS):  $\delta = 7.23\text{--}7.27$  (m, 2H), 7.10-7.18 (m, 3H), 6.87-6.90 (m, 4H), 6.59-6.61 (m, 2H), 5.33 (s, 1H), 5.05 (s, 1H), 3.56 (s, 2H), 1.35 (s, 18H);  $^{13}\text{C}$  NMR (100 MHz,  $\text{CDCl}_3$ , 25 °C, TMS):  $\delta = 152.0$  (s), 145.5 (s), 144.3 (s), 135.4 (s), 135.2 (s), 134.7 (s), 130.2 (s), 129.4 (s), 128.1 (s), 126.0 (s), 125.8 (s), 115.1 (s), 56.1 (s), 36.4 (s), 30.4 (s). HRMS (ESI)  $m/z$ : calcd. for  $\text{C}_{27}\text{H}_{34}\text{NO}$   $[\text{M}+\text{H}]^+$ : 388.2635, found: 388.2629.

### 4-((4-Amino-3-methylphenyl)(phenyl)methyl)-2,6-di-*tert*-butylphenol (3b)

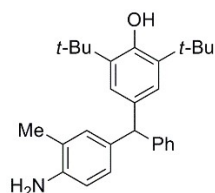

According to the general procedure, work-up and flash column chromatography (Hexane/EtOAc: 10:1) gave product **3b** (66.7 mg, 0.17 mmol, 83%) as a yellow solid. mp: 147.3-147.5 °C.  $^1\text{H}$  NMR (400 MHz,  $\text{CDCl}_3$ , 25 °C, TMS):  $\delta = 7.22\text{--}7.26$  (m, 2H), 7.10-7.17 (m, 3H), 6.91-6.92 (m, 2H), 6.82-6.83 (m, 1H), 6.72-6.75 (m, 1H), 6.57-6.59 (m, 1H), 5.31 (s, 1H), 5.05 (s, 1H), 3.49 (s, 2H), 2.10 (s, 3H), 1.36 (s, 18H);  $^{13}\text{C}$  NMR (100 MHz,  $\text{CDCl}_3$ , 25 °C, TMS):  $\delta = 152.0$  (s), 145.6 (s), 142.5 (s), 135.3 (s), 135.2 (s), 134.8 (s), 131.5 (s), 129.4 (s), 128.0 (s), 127.9 (s), 126.0 (s), 125.8 (s), 122.2 (s), 114.9 (s), 56.2 (s), 34.4 (s), 30.4 (s), 17.5 (s). HRMS (ESI)  $m/z$ : calcd. for  $\text{C}_{28}\text{H}_{36}\text{NO}$   $[\text{M}+\text{H}]^+$ : 402.2792, found: 402.2788.

### 4-((4-Amino-2-methylphenyl)(phenyl)methyl)-2,6-di-*tert*-butylphenol (3c)

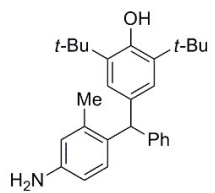

According to the general procedure, work-up and flash column chromatography (hexane/EtOAc: 10:1) gave product **3c** (68.3 mg, 0.17 mmol, 85%) as a yellow oil.  $^1\text{H}$  NMR (400 MHz,  $\text{CDCl}_3$ , 25 °C, TMS):  $\delta = 7.22\text{--}7.25$  (m, 2H), 7.14-7.17 (m, 1H), 7.05-7.06 (m, 2H), 6.82-6.83 (m, 2H), 6.58-6.60 (m, 1H), 6.50-6.51 (m, 1H), 6.42-6.44 (m, 1H), 5.45 (s, 1H), 5.04 (s, 1H), 3.50 (s, 2H), 2.12 (s, 3H), 1.34 (s, 18H);  $^{13}\text{C}$  NMR (100 MHz,  $\text{CDCl}_3$ , 25 °C, TMS):  $\delta = 151.9$  (s), 144.8 (s), 144.3 (s), 137.5 (s), 135.3 (s), 134.3 (s), 133.8 (s), 130.3 (s), 129.5 (s), 128.0 (s), 126.2 (s), 125.8 (s), 117.4 (s), 122.4 (s), 52.8 (s), 34.3 (s), 30.4 (s), 20.1 (s). HRMS (ESI)  $m/z$ : calcd. for  $\text{C}_{28}\text{H}_{36}\text{NO}$   $[\text{M}+\text{H}]^+$ : 402.2792, found: 402.2786.

### 4-((4-Amino-3-methoxyphenyl)(phenyl)methyl)-2,6-di-*tert*-butylphenol (3d)

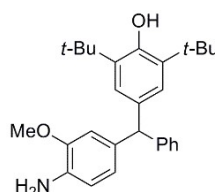

According to the general procedure, work-up and flash column chromatography (hexane/EtOAc: 10:1) gave product **3d** (70.3 mg, 0.17 mmol, 84%) as a yellow oil.  $^1\text{H}$  NMR (400 MHz,  $\text{CDCl}_3$ , 25 °C, TMS):  $\delta = 7.22\text{--}7.26$  (m, 2H), 7.10-7.17 (m, 3H), 6.92-6.93 (m, 2H), 6.57-6.62 (m, 2H), 6.48-6.51 (m, 1H), 5.34 (s, 1H), 5.06 (s, 1H), 3.71 (s,

3H), 3.36 (s, 2H), 1.36 (s, 18H);  $^{13}\text{C}$  NMR (100 MHz,  $\text{CDCl}_3$ , 25 °C, TMS):  $\delta$  = 152.1 (s), 147.3 (s), 145.5 (s), 135.4 (s), 135.3 (s), 134.7 (s), 134.0 (s), 129.4 (s), 128.1 (s), 126.0 (s), 125.9 (s), 122.0 (s), 114.8 (s), 112.0 (s), 56.5 (s), 55.5 (s), 34.4 (s), 30.4 (s). HRMS (ESI)  $m/z$ : calcd. for  $\text{C}_{28}\text{H}_{36}\text{NO}_2$   $[\text{M}+\text{H}]^+$ : 418.2741, found: 418.2735.

#### 4-((4-Amino-3-fluorophenyl)(phenyl)methyl)-2,6-di-*tert*-butylphenol (3e)

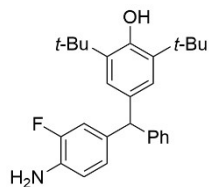

According to the general procedure, work-up and flash column chromatography (hexane/EtOAc: 10:1) gave product **3e** (66.6 mg, 0.16 mmol, 82%) as a yellow oil.  $^1\text{H}$  NMR (400 MHz,  $\text{CDCl}_3$ , 25 °C, TMS):  $\delta$  = 7.24-7.28 (m, 2H), 7.16-7.19 (m, 1H), 7.09-7.11 (m, 2H), 6.88-6.89 (m, 2H), 6.65-6.74 (m, 3H), 5.32 (s, 1H), 5.07 (s, 1H), 3.61 (s, 2H), 1.36 (s, 18H);  $^{13}\text{C}$  NMR (100 MHz,  $\text{CDCl}_3$ , 25 °C, TMS):  $\delta$  = 151.6 (d,  $J(\text{C},\text{F})$  = 237.0 Hz), 152.1 (s), 144.8 (s), 136.1 (d,  $J(\text{C},\text{F})$  = 5.5 Hz), 135.5 (s), 134.2 (s), 132.2 (d,  $J(\text{C},\text{F})$  = 13.2 Hz), 129.3 (s), 128.2 (s), 126.1 (s), 125.9 (s), 125.2 (d,  $J(\text{C},\text{F})$  = 3.1 Hz), 116.7 (d,  $J(\text{C},\text{F})$  = 3.7 Hz), 116.2 (d,  $J(\text{C},\text{F})$  = 19.1 Hz), 55.9 (s), 34.4 (s), 30.4 (s);  $^{19}\text{F}$  NMR (376 MHz,  $\text{CDCl}_3$ , 25 °C, TMS):  $\delta$  = -135.2 (s). HRMS (ESI)  $m/z$ : calcd. for  $\text{C}_{27}\text{H}_{33}\text{FNO}$   $[\text{M}+\text{H}]^+$ : 406.2541, found: 406.2534.

#### 4-((4-Amino-2-fluorophenyl)(phenyl)methyl)-2,6-di-*tert*-butylphenol (3f)

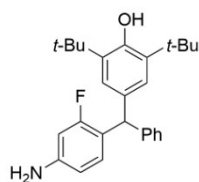

According to the general procedure, work-up and flash column chromatography (hexane/EtOAc: 10:1) gave product **3f** (65.6 mg, 0.16 mmol, 81%) as a yellow oil.  $^1\text{H}$  NMR (400 MHz,  $\text{CDCl}_3$ , 25 °C, TMS):  $\delta$  = 7.23-7.27 (m, 2H), 7.15-7.19 (m, 1H), 7.09-7.11 (m, 2H), 6.88-6.89 (m, 2H), 6.67-6.71 (m, 1H), 6.34-6.36 (m, 2H), 5.60 (s, 1H), 5.02 (s, 1H), 3.63 (s, 2H), 1.35 (s, 18H);  $^{13}\text{C}$  NMR (100 MHz,  $\text{CDCl}_3$ , 25 °C, TMS):  $\delta$  = 161.3 (d,  $J(\text{C},\text{F})$  = 243.2 Hz), 152.1 (s), 146.4 (d,  $J(\text{C},\text{F})$  = 10.9 Hz), 144.2 (s), 135.4 (s), 133.4 (s), 131.4 (d,  $J(\text{C},\text{F})$  = 6.0 Hz), 129.1 (s), 128.1 (s), 126.0 (s), 125.9 (s), 121.7 (d,  $J(\text{C},\text{F})$  = 15.1 Hz), 110.5 (d,  $J(\text{C},\text{F})$  = 2.7 Hz), 102.2 (d,  $J(\text{C},\text{F})$  = 25.6 Hz), 48.7 (d,  $J(\text{C},\text{F})$  = 2.6 Hz), 34.4 (s), 30.4 (s);  $^{19}\text{F}$  NMR (376 MHz,  $\text{CDCl}_3$ , 25 °C, TMS):  $\delta$  = -116.2 (s). HRMS (ESI)  $m/z$ : calcd. for  $\text{C}_{27}\text{H}_{33}\text{FNO}$   $[\text{M}+\text{H}]^+$ : 406.2541, found: 406.2535.

#### 4-((4-Amino-2-chlorophenyl)(phenyl)methyl)-2,6-di-*tert*-butylphenol (3g)

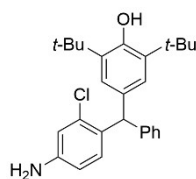

According to the general procedure, work-up and flash column chromatography (hexane/EtOAc: 10:1) gave product **3g** (68.4 mg, 0.16 mmol, 81%) as a yellow oil.  $^1\text{H}$  NMR (400 MHz,  $\text{CDCl}_3$ , 25 °C, TMS):  $\delta$  = 7.24-7.27 (m, 2H), 7.18-7.19 (m, 1H), 7.06-7.08 (m, 2H), 6.84-6.85 (m, 2H), 6.70-6.72 (m, 2H), 6.47-6.49 (m, 1H), 5.73 (s, 1H), 5.07 (s, 1H), 3.62 (s, 2H), 1.35 (s, 18H);  $^{13}\text{C}$  NMR (100 MHz,  $\text{CDCl}_3$ , 25 °C, TMS):  $\delta$  = 152.0 (s), 145.5 (s), 144.0 (s), 135.3 (s), 135.3 (s), 134.8 (s), 133.5 (s), 132.5 (s), 131.6 (s), 129.4 (s), 128.1 (s), 126.2 (s), 126.0 (s), 115.8 (s), 52.4 (s), 34.3 (s), 30.4 (s). HRMS (ESI)  $m/z$ : calcd. for  $\text{C}_{27}\text{H}_{33}\text{ClNO}$   $[\text{M}+\text{H}]^+$ : 422.2246, found: 422.2241.

#### 4-((4-Amino-3-bromophenyl)(phenyl)methyl)-2,6-di-*tert*-butylphenol (3h)

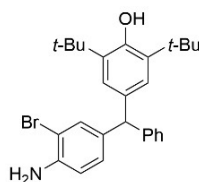

According to the general procedure, work-up and flash column chromatography (hexane/EtOAc: 10:1) gave product **3h** (77.2 mg, 0.17 mmol, 83%) as a yellow oil.  $^1\text{H}$  NMR (400 MHz,  $\text{CDCl}_3$ , 25 °C, TMS):  $\delta$  = 7.22-7.27 (m, 2H), 7.15-7.19 (m, 2H), 7.08-7.10 (m, 2H), 6.87-6.88 (m, 2H), 6.82-6.84 (m, 1H), 6.64-6.66 (m, 1H), 5.30 (s, 1H), 5.08 (s, 1H), 3.95 (s, 2H), 1.36 (s, 18H);  $^{13}\text{C}$  NMR (100 MHz,  $\text{CDCl}_3$ , 25 °C, TMS):  $\delta$  = 152.2 (s), 144.8 (s), 142.1 (s), 136.4 (s), 135.5 (s), 134.1 (s), 133.2 (s), 129.4 (s), 129.3 (s), 128.2 (s), 126.1 (s), 125.9 (s),

115.6 (s), 109.3 (s), 55.7 (s), 34.4 (s), 30.4 (s). HRMS (ESI)  $m/z$ : calcd. for  $C_{27}H_{33}BrNO$   $[M+H]^+$ : 466.1741, found: 466.1735.

#### 4-((4-Amino-3-iodophenyl)(phenyl)methyl)-2,6-di-*tert*-butylphenol (3i)

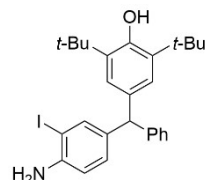

According to the general procedure, work-up and flash column chromatography (hexane/EtOAc: 10:1) gave product **3i** (81.1 mg, 0.16 mmol, 79%) as a yellow oil.  $^1H$  NMR (400 MHz,  $CDCl_3$ , 25 °C, TMS):  $\delta$  = 7.41-7.42 (m, 1H), 7.24-7.28 (m, 2H), 7.16-7.20 (m, 1H), 7.08-7.10 (m, 2H), 6.84-6.88 (m, 3H), 6.64-6.66 (m, 1H), 5.28 (s, 1H), 5.08 (s, 1H), 3.98 (s, 2H), 1.36 (s, 18H);  $^{13}C$  NMR (100 MHz,  $CDCl_3$ , 25 °C, TMS):  $\delta$  = 152.1 (s), 144.8 (s), 139.5 (s), 136.8 (s), 135.5 (s), 134.0 (s), 130.4 (s), 129.3 (s), 129.2 (s), 128.2 (s), 126.1 (s), 125.9 (s), 114.5 (s), 84.4 (s), 55.5 (s), 34.4 (s), 30.4 (s). HRMS (ESI)  $m/z$ : calcd. for  $C_{27}H_{33}INO$   $[M+H]^+$ : 514.1602, found: 514.1595.

#### 4-((4-Amino-2-ethynylphenyl)(phenyl)methyl)-2,6-di-*tert*-butylphenol (3j)

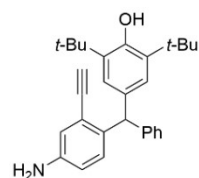

According to the general procedure, work-up and flash column chromatography (hexane/EtOAc: 5:1) gave product **3j** (65.9 mg, 0.16 mmol, 80%) as a yellow oil.  $^1H$  NMR (400 MHz,  $CDCl_3$ , 25 °C, TMS):  $\delta$  = 7.22-7.26 (m, 2H), 7.16-7.18 (m, 1H), 7.09-7.11 (m, 2H), 6.89-6.90 (m, 2H), 6.79-6.83 (m, 2H), 6.59-6.61 (m, 1H), 5.86 (s, 1H), 5.05 (s, 1H), 3.59 (s, 2H), 3.15 (s, 1H), 1.35 (m, 18H);  $^{13}C$  NMR (100 MHz,  $CDCl_3$ , 25 °C, TMS):  $\delta$  = 151.9 (s), 144.6 (s), 144.1 (s), 138.0 (s), 135.2 (s), 134.0 (s), 130.2 (s), 129.4 (s), 127.9 (s), 126.2 (s), 125.8 (s), 122.7 (s), 119.0 (s), 116.1 (s), 82.7 (s), 80.9 (s), 53.3 (s), 34.3 (s), 30.4 (s). HRMS (ESI)  $m/z$ : calcd. for  $C_{29}H_{34}NO$   $[M+H]^+$ : 412.2635, found: 412.2631. HRMS (ESI)  $m/z$ : calcd. for  $C_{29}H_{34}NO$   $[M+H]^+$ : 412.2635, found: 412.2630.

#### 4-((4-Amino-2,3-dimethylphenyl)(phenyl)methyl)-2,6-di-*tert*-butylphenol (3k)

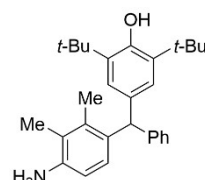

According to the general procedure, work-up and flash column chromatography (hexane/EtOAc: 5:1) gave product **3k** (66.7 mg, 0.16 mmol, 81%) as a white solid. mp: 153.2-153.5 °C.  $^1H$  NMR (400 MHz,  $CDCl_3$ , 25 °C, TMS):  $\delta$  = 7.21-7.25 (m, 2H), 7.13-7.17 (m, 1H), 7.04-7.05 (m, 2H), 6.82-6.83 (m, 2H), 6.44-6.49 (m, 2H), 5.54 (s, 1H), 5.04 (s, 1H), 3.50 (s, 2H), 2.12 (s, 3H), 2.09 (s, 3H), 1.34 (m, 18H);  $^{13}C$  NMR (100 MHz,  $CDCl_3$ , 25 °C, TMS):  $\delta$  = 151.8 (s), 145.2 (s), 142.5 (s), 135.6 (s), 135.2 (s), 134.6 (s), 134.0 (s), 129.5 (s), 128.0 (s), 127.6 (s), 126.4 (s), 125.7 (s), 121.4 (s), 112.5 (s), 53.7 (s), 34.3 (s), 30.4 (s), 16.1 (s), 13.5 (s). HRMS (ESI)  $m/z$ : calcd. for  $C_{29}H_{38}NO$   $[M+H]^+$ : 416.2948, found: 416.2940.

#### 4-((4-Amino-2,6-dimethylphenyl)(phenyl)methyl)-2,6-di-*tert*-butylphenol (3l)

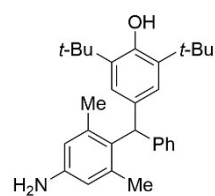

According to the general procedure, work-up and flash column chromatography (hexane/EtOAc: 10:1) gave product **3l** (58.2 mg, 0.14 mmol, 68%) as a white solid. mp: 143.3-143.7 °C.  $^1H$  NMR (400 MHz,  $CDCl_3$ , 25 °C, TMS):  $\delta$  = 7.17-7.28 (m, 5H), 7.04-7.05 (m, 2H), 6.45 (s, 1H), 6.30 (s, 1H), 5.70 (s, 1H), 5.09 (s, 1H), 3.30 (s, 2H), 2.22 (s, 3H), 2.20 (s, 3H), 1.35 (m, 18H);  $^{13}C$  NMR (100 MHz,  $CDCl_3$ , 25 °C, TMS):  $\delta$  = 152.2 (s), 145.5 (s), 143.4 (s), 137.9 (s), 136.7 (s), 135.7 (s), 132.2 (s), 128.9 (s), 125.8 (s), 124.6 (s), 122.2 (s), 116.4 (s),



49.8 (s), 34.4 (s), 30.4 (s), 21.5 (s), 21.0 (s). HRMS (ESI)  $m/z$ : calcd. for  $C_{29}H_{38}NO$   $[M+H]^+$ : 416.2948, found: 416.2942.

#### 4-((4-Amino-5-iodo-2-methylphenyl)(phenyl)methyl)-2,6-di-*tert*-butylphenol (3m)

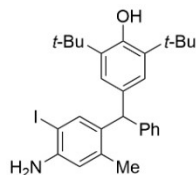

According to the general procedure, work-up and flash column chromatography (hexane/EtOAc: 5:1) gave product **3m** (87.6 mg, 0.17 mmol, 83%) as a yellow oil.  $^1H$  NMR (400 MHz,  $CDCl_3$ , 25 °C, TMS):  $\delta$  = 7.23-7.27 (m, 2H), 7.17-7.18 (m, 1H), 7.03-7.05 (m, 3H), 6.82 (s, 2H), 6.55 (s, 1H), 5.38 (s, 1H), 5.07 (s, 1H), 3.90 (s, 2H), 2.07 (s, 3 H), 1.36 (m, 18H);  $^{13}C$  NMR (100 MHz,  $CDCl_3$ , 25 °C, TMS):  $\delta$  = 152.1 (s), 144.8 (s), 144.1 (s), 139.5 (s), 138.2 (s), 135.7 (s), 135.5 (s), 133.6 (s), 129.3 (s), 128.2 (s), 126.1 (s), 126.0 (s), 116.8 (s), 80.9 (s), 52.6 (s), 34.4 (s), 30.4 (s), 19.9 (s). HRMS (ESI)  $m/z$ : calcd. for  $C_{28}H_{35}INO$   $[M+H]^+$ : 528.1758, found: 528.1753.

#### 2,6-Di-*tert*-butyl-4-((4-(dimethylamino)phenyl)(phenyl)methyl)phenol (3n)

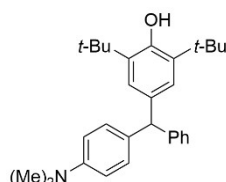

According to the general procedure, work-up and flash column chromatography (hexane/EtOAc: 20:1) gave product **3n** (71.6 mg, 0.17 mmol, 86%) as a yellow oil.  $^1H$  NMR (400 MHz,  $CDCl_3$ , 25 °C, TMS):  $\delta$  = 7.23-7.27 (m, 2H), 7.16-7.18 (m, 3H), 6.92-6.98 (m, 4H), 6.66-6.68 (m, 2H), 5.35 (s, 1H), 5.05 (s, 1H), 2.91 (s, 6H), 1.36 (s, 18H);  $^{13}C$  NMR (100 MHz,  $CDCl_3$ , 25 °C, TMS):  $\delta$  = 151.9 (s), 148.9 (s), 145.7 (s), 135.3 (s), 134.8 (s), 133.1 (s), 130.0 (s), 129.4 (s), 128.0 (s), 126.0 (s), 125.8 (s), 112.6 (s), 56.0 (s), 40.8 (s), 34.4 (s), 30.4 (s). HRMS (ESI)  $m/z$ : calcd. for  $C_{29}H_{38}NO$   $[M+H]^+$ : 416.2948, found: 416.2942.

#### 2,6-Di-*tert*-butyl-4-((4-(dibenzylamino)phenyl)(phenyl)methyl)phenol (3o)

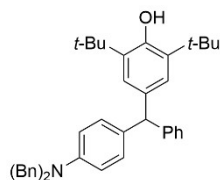

According to the general procedure, work-up and flash column chromatography (hexane/EtOAc: 10:1) gave product **3o** (88.6 mg, 0.16 mmol, 78%) as a yellow oil.  $^1H$  NMR (400 MHz,  $CDCl_3$ , 25 °C, TMS):  $\delta$  = 7.11-7.22 (m, 12H), 7.02-7.08 (m, 3H), 6.79-6.82 (m, 4H), 6.55-6.57 (m, 2H), 5.23 (s, 1H), 4.94 (s, 1H), 4.51 (s, 4H), 1.26 (s, 18H);  $^{13}C$  NMR (100 MHz,  $CDCl_3$ , 25 °C, TMS):  $\delta$  = 152.0 (s), 147.5 (s), 145.7 (s), 138.9 (s), 135.3 (s), 134.9 (s), 133.1 (s), 130.1 (s), 129.5 (s), 128.7 (s), 128.1 (s), 126.9 (s), 126.8 (s), 126.1 (s), 125.9 (s), 112.5 (s), 56.0 (s), 54.5 (s), 34.4 (s), 30.5 (s). HRMS (ESI)  $m/z$ : calcd. for  $C_{41}H_{46}NO$   $[M+H]^+$ : 568.3574, found: 568.3570.

#### 2,6-Di-*tert*-butyl-4-((4-(diethylamino)-2-methylphenyl)(phenyl)methyl)phenol (3p)

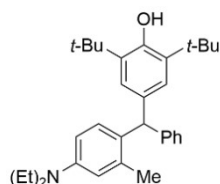

According to the general procedure, work-up and flash column chromatography (hexane/EtOAc: 20:1) gave product **3p** (65.1 mg, 0.14 mmol, 74%) as a red oil.  $^1H$  NMR (400 MHz,  $CDCl_3$ , 25 °C, TMS):  $\delta$  = 7.22-7.26 (m, 2H), 7.12-7.17 (m, 1H), 7.07-7.09 (m, 2H), 6.86 (s, 2H), 6.62-6.64 (m, 1H), 6.43-6.50 (m, 2H), 5.44 (s, 1H), 5.03 (s, 1H), 3.28-3.33 (m, 4H), 2.15 (s, 3H), 1.35 (s, 18H), 1.13 (t,  $J$  = 7.0 Hz, 6H);  $^{13}C$  NMR (100 MHz,  $CDCl_3$ , 25 °C, TMS):  $\delta$  = 146.5 (s), 140.9 (s), 139.9 (s), 131.9 (s), 129.9 (s), 129.3 (s), 125.3 (s), 124.8 (s), 124.1 (s), 122.6 (s), 121.0 (s), 120.3 (s), 108.7 (s), 104.0 (s), 47.51 (s), 38.96 (s), 29.02 (s), 25.07 (s), 15.36 (s), 7.40 (s). HRMS (ESI)  $m/z$ : calcd. for  $C_{32}H_{44}NO$   $[M+H]^+$ : 458.3418, found: 458.3413.

### 2,6-Di-*tert*-butyl-4-((4-(dimethylamino)-2-methoxyphenyl)(phenyl)methyl)phenol (**3q**)

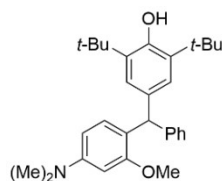

According to the general procedure, work-up and flash column chromatography (hexane/EtOAc: 20:1) gave product **3q** (66.2 mg, 0.14 mmol, 71%) as a yellow solid. mp: 136.1-136.3 °C. <sup>1</sup>H NMR (400 MHz, CDCl<sub>3</sub>, 25 °C, TMS): δ = 7.11-7.14 (m, 2H), 7.00-7.05 (m, 3H), 6.82-6.83 (m, 2H), 6.63-6.65 (m, 1H), 6.16-6.18 (m, 2H), 5.61 (s, 1H), 4.92 (s, 1H), 3.60 (s, 3H), 2.83 (s, 6H), 1.27 (s, 18H); <sup>13</sup>C NMR (100 MHz, CDCl<sub>3</sub>, 25 °C, TMS): δ = 157.9 (s), 151.8 (s), 150.5 (s), 145.7 (s), 135.1 (s), 134.8 (s), 130.6 (s), 129.3 (s), 127.8 (s), 126.3 (s), 125.5 (s), 122.3 (s), 104.6 (s), 96.8 (s), 55.7 (s), 49.0 (s), 40.9 (s), 34.4 (s), 30.5 (s). HRMS (ESI) *m/z*: calcd. for C<sub>30</sub>H<sub>40</sub>NO<sub>2</sub> [M+H]<sup>+</sup>: 446.3054, found: 446.3050.

### 2,6-Di-*tert*-butyl-4-((4-(methylamino)phenyl)(phenyl)methyl)phenol (**3r**)

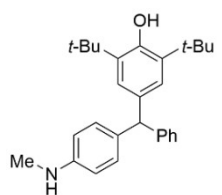

According to the general procedure, work-up and flash column chromatography (hexane/EtOAc: 30:1) gave product **3r** (67.5 mg, 0.17 mmol, 84%) as a yellow oil. <sup>1</sup>H NMR (400 MHz, CDCl<sub>3</sub>, 25 °C, TMS): δ = 7.23-7.26 (m, 2H), 7.11-7.17 (m, 3H), 6.92-6.93 (m, 4H), 6.52-6.54 (m, 2H), 5.34 (s, 1H), 5.05 (s, 1H), 3.60 (s, 1H), 2.80 (s, 3H), 1.36 (s, 18H); <sup>13</sup>C NMR (100 MHz, CDCl<sub>3</sub>, 25 °C, TMS): δ = 151.9 (s), 147.5 (s), 145.7 (s), 135.3 (s), 134.8 (s), 133.8 (s), 130.1 (s), 129.4 (s), 128.1 (s), 126.0 (s), 125.8 (s), 112.3 (s), 56.1 (s), 34.4 (s), 31.0 (s), 30.4 (s). HRMS (ESI) *m/z*: calcd. for C<sub>28</sub>H<sub>36</sub>NO [M+H]<sup>+</sup>: 402.2792, found: 402.2787.

### 2,6-Di-*tert*-butyl-4-((4-(ethylamino)phenyl)(phenyl)methyl)phenol (**3s**)

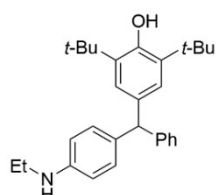

According to the general procedure, work-up and flash column chromatography (hexane/EtOAc: 30:1) gave product **3s** (68.2 mg, 0.16 mmol, 82%) as a red oil. <sup>1</sup>H NMR (400 MHz, CDCl<sub>3</sub>, 25 °C, TMS): δ = 7.22-7.26 (m, 2H), 7.10-7.17 (m, 3H), 6.90-6.91 (m, 4H), 6.52-6.54 (m, 2H), 5.33 (s, 1H), 5.04 (s, 1H), 3.42 (s, 1H), 3.10-3.15 (m, 2H), 1.35 (s, 18H), 1.23 (t, *J* = 7.1 Hz, 3H); <sup>13</sup>C NMR (100 MHz, CDCl<sub>3</sub>, 25 °C, TMS): δ = 151.9 (s), 146.6 (s), 145.7 (s), 135.3 (s), 134.9 (s), 133.8 (s), 130.2 (s), 129.4 (s), 128.0 (s), 126.0 (s), 125.8 (s), 112.6 (s), 56.1 (s), 38.7 (s), 34.4 (s), 30.4 (s), 15.0 (s). HRMS (ESI) *m/z*: calcd. for C<sub>29</sub>H<sub>38</sub>NO [M+H]<sup>+</sup>: 416.2948, found: 416.2944.

### 2,6-Di-*tert*-butyl-4-((4-(naphthalen-2-ylamino)phenyl)(phenyl)methyl)phenol (**3t**)

According to the general procedure, work-up and flash column chromatography (hexane/EtOAc: 20:1) gave product **3t** (75.0 mg, 0.15 mmol, 73%) as a yellow oil. <sup>1</sup>H NMR (400 MHz, CDCl<sub>3</sub>, 25 °C, TMS): δ = 7.69-7.71 (m, 2H), 7.59-7.61 (m, 1H), 7.35-7.39 (m, 2H), 7.24-7.30 (m, 3H), 7.15-7.22 (m, 4H), 7.04-7.09 (m, 4H), 6.94 (s, 2H), 5.80 (s, 1H), 5.42 (s, 1H), 5.07 (s, 1H), 1.37 (s, 18H); <sup>13</sup>C NMR (100 MHz, CDCl<sub>3</sub>, 25 °C, TMS): δ = 152.1 (s), 145.1 (s), 141.3 (s), 140.7 (s), 138.2 (s), 135.5 (s), 134.7 (s), 134.4 (s), 130.3 (s), 129.4 (s), 129.1 (s), 129.0 (s), 128.2 (s), 127.7 (s), 126.5 (s), 126.4 (s), 126.1 (s), 126.0 (s), 123.3 (s), 119.8 (s), 118.5 (s), 110.9 (s), 56.3 (s), 34.4 (s), 30.4 (s). HRMS (ESI) *m/z*: calcd. for C<sub>37</sub>H<sub>40</sub>NO [M+H]<sup>+</sup>: 514.3105, found: 514.3100.

### 2,6-Di-*tert*-butyl-4-((4-(diphenylamino)phenyl)(phenyl)methyl)phenol (3u)

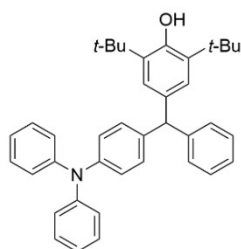

According to the general procedure, work-up and flash column chromatography (hexane/EtOAc: 20:1) gave product **3u** as a yellow oil. <sup>1</sup>H NMR (400 MHz, CDCl<sub>3</sub>, 25 °C, TMS): δ = 7.18-7.23 (m, 2H), 7.10-7.16 (m, 5H), 7.06-7.08 (m, 2H), 6.98-7.00 (m, 4H), 6.88-6.92 (m, 6H), 6.83 (m, 2H), 5.32 (s, 1H), 5.00 (s, 1H), 1.30 (s, 18H); <sup>13</sup>C NMR (100 MHz, CDCl<sub>3</sub>, 25 °C, TMS): δ = 151.0 (s), 146.9 (s), 144.7 (s), 143.9 (s), 138.4 (s), 134.4 (s), 133.3 (s), 129.1 (s), 128.4 (s), 128.2 (s), 128.1 (s), 127.1 (s), 125.0 (s), 123.2 (s), 122.8 (s), 121.4 (s), 55.2 (s), 33.3 (s), 29.3 (s). HRMS (ESI) *m/z*: calcd. for C<sub>39</sub>H<sub>42</sub>NO [M+H]<sup>+</sup>: 540.3261, found: 540.3254.

### 4,4'-(((Phenylazanediy)bis(4,1-phenylene))bis(phenylmethylene))bis(2,6-di-*tert*-butylphenol) (3u')

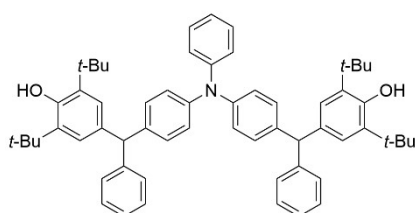

According to the general procedure, work-up and flash column chromatography (hexane/EtOAc: 10:1) gave product **3u'** as a yellow oil. <sup>1</sup>H NMR (400 MHz, CDCl<sub>3</sub>, 25 °C, TMS): δ = 7.17-7.22 (m, 4H), 7.09-7.13 (m, 4H), 7.05-7.07 (m, 4H), 6.96-6.98 (m, 2H), 6.86-6.90 (m, 9H), 6.82 (m, 4H), 5.31 (s, 2H), 4.99 (s, 2H), 1.28 (s, 36H); <sup>13</sup>C NMR (100 MHz, CDCl<sub>3</sub>, 25 °C, TMS): δ = 151.0 (s), 146.9 (s), 144.7 (s), 143.9 (s), 138.1 (s), 134.3 (s), 133.4 (s), 129.1 (s), 128.4 (s), 128.0 (s), 127.1 (s), 125.0 (s), 122.9 (s), 122.8 (s), 122.4 (s), 121.0 (s), 55.2 (s), 33.3 (s), 29.3 (s). HRMS (ESI) *m/z*: calcd. for C<sub>60</sub>H<sub>68</sub>NO<sub>2</sub> [M+H]<sup>+</sup>: 834.5245, found: 834.5241.

### 4,4',4''-((Nitrilotris(benzene-4,1-diyl))tris(phenylmethylene))tris(2,6-di-*tert*-butylphenol) (3u'')

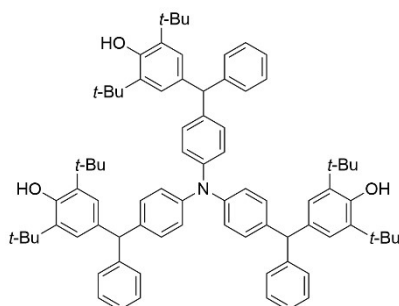

According to the general procedure, work-up and flash column chromatography (hexane/EtOAc: 5:1) gave product **3u''** as a yellow oil. <sup>1</sup>H NMR (400 MHz, CDCl<sub>3</sub>, 25 °C, TMS): δ = 7.23-7.28 (m, 6H), 7.17-7.19 (m, 2H), 7.11-7.13 (m, 6H), 6.92-6.98 (m, 11H), 6.89 (m, 6H), 5.37 (s, 3H), 5.05 (s, 2H), 1.35 (s, 54H); <sup>13</sup>C NMR (100 MHz, CDCl<sub>3</sub>, 25 °C, TMS): δ = 152.1 (s), 145.9 (s), 145.05 (s), 138.8 (s), 135.4 (s), 134.5 (s), 130.0 (s), 129.4 (s), 128.1 (s), 126.1 (s), 126.0 (s), 123.7 (s), 56.2 (s), 34.4 (s), 30.4 (s). HRMS (ESI) *m/z*: calcd. for C<sub>81</sub>H<sub>94</sub>NO<sub>3</sub> [M+H]<sup>+</sup>: 1128.7229, found: 1128.7223.

### 2,6-Di-*tert*-butyl-4-(phenyl(4-(phenylamino)phenyl)methyl)phenol (3v)

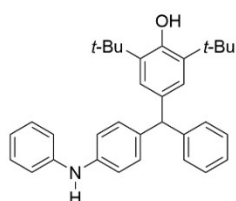

According to the general procedure, work-up and flash column chromatography (hexane/EtOAc: 20:1) gave product **3v** as a yellow oil. <sup>1</sup>H NMR (400 MHz, CDCl<sub>3</sub>, 25 °C, TMS): δ = 7.05-7.22 (m, 7H), 6.90-6.96 (m, 6H), 6.79-6.85 (m, 3H), 5.57 (s, 1H), 5.31 (s, 1H), 4.99 (s, 1H), 1.29 (s, 18H); <sup>13</sup>C NMR (100 MHz, CDCl<sub>3</sub>, 25 °C, TMS): δ = 151.0 (s), 144.1 (s), 142.5 (s), 139.9 (s), 136.7 (s), 134.4 (s), 133.4 (s), 129.2 (s), 128.3 (s), 128.2 (s), 127.1 (s), 124.9 (s), 124.8 (s), 119.5 (s), 117.0 (s), 116.3 (s), 55.2 (s), 33.3 (s), 29.3 (s). HRMS (ESI) *m/z*: calcd. for C<sub>33</sub>H<sub>38</sub>NO [M+H]<sup>+</sup>: 464.2948, found: 464.2944.

#### 4,4'-((Azanediylbis(4,1-phenylene))bis(phenylmethylene))bis(2,6-di-*tert*-butylphenol) (**3v'**)

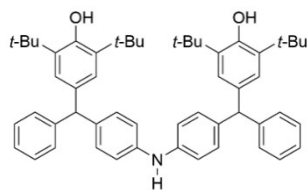

According to the general procedure, work-up and flash column chromatography (hexane/EtOAc: 10:1) gave product **3v'** as a yellow oil. <sup>1</sup>H NMR (400 MHz, CDCl<sub>3</sub>, 25 °C, TMS): δ = 7.24-7.28 (m, 4H), 7.15-7.19 (m, 2H), 7.11-7.13 (m, 4H), 6.94-6.99 (m, 8H), 6.91 (m, 4H), 5.59 (s, 1H), 5.37 (s, 2H), 5.06 (s, 2H), 1.36 (s, 36H); <sup>13</sup>C NMR (100 MHz, CDCl<sub>3</sub>, 25 °C, TMS): δ = 152.0 (s), 145.2 (s), 141.3 (s), 137.3 (s), 135.4 (s), 134.5 (s), 130.2 (s), 129.4 (s), 128.1 (s), 126.0 (s), 125.9 (s), 117.5 (s), 56.2 (s), 34.4 (s), 30.4 (s). HRMS (ESI) *m/z*: calcd. for C<sub>54</sub>H<sub>64</sub>NO<sub>2</sub> [M+H]<sup>+</sup>: 758.4932, found: 758.4928.

#### 4-((1-Aminonaphthalen-2-yl)(phenyl)methyl)-2,6-di-*tert*-butylphenol (**3w**)

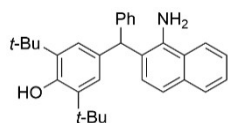

According to the general procedure, work-up and flash column chromatography (Hexane/EtOAc: 10:1) gave product **3w** (49.1 mg, 0.11 mmol, 56%) as a colorless oil. <sup>1</sup>H NMR (400 MHz, CDCl<sub>3</sub>, 25 °C, TMS): δ = 7.99-8.01 (m, 1H), 7.84-7.86 (m, 1H), 7.36-7.46 (m, 2H), 7.21-7.25 (m, 2H), 7.10-7.17 (m, 3H), 6.88 (s, 2H), 6.69-6.75 (m, 2H), 6.06 (s, 1H), 5.05 (s, 1H), 4.22 (s, 2H), 1.33 (s, 18H); <sup>13</sup>C NMR (100 MHz, CDCl<sub>3</sub>, 25 °C, TMS): δ = 152.0 (s), 145.0 (s), 140.5 (s), 135.4 (s), 134.5 (s), 134.1 (s), 132.7 (s), 131.9 (s), 129.5 (s), 128.1 (s), 127.9 (s), 126.4 (s), 125.9 (s), 125.2 (s), 124.4 (s), 124.3 (s), 121.3 (s), 109.5 (s), 52.7 (s), 34.3 (s), 30.4 (s). HRMS (ESI) *m/z*: calcd. for C<sub>31</sub>H<sub>36</sub>NO [M+H]<sup>+</sup>: 438.2792, found: 438.2786.

#### 4-((2-Aminonaphthalen-1-yl)(phenyl)methyl)-2,6-di-*tert*-butylphenol (**3x**)

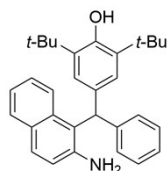

According to the general procedure, work-up and flash column chromatography (hexane/EtOAc: 10:1) gave product **3x** (64.8 mg, 0.15 mmol, 74%) as a colorless oil. <sup>1</sup>H NMR (400 MHz, CDCl<sub>3</sub>, 25 °C, TMS): δ = 7.95-7.97 (m, 1H), 7.69-7.71 (m, 1H), 7.60-7.62 (m, 1H), 7.32-7.36 (m, 1H), 7.17-7.28 (m, 6H), 7.07 (s, 2H), 6.84-6.86 (m, 1H), 6.28 (s, 1H), 5.10 (s, 1H), 3.57 (s, 2H), 1.33 (s, 18H); <sup>13</sup>C NMR (100 MHz, CDCl<sub>3</sub>, 25 °C, TMS): δ = 152.3 (s), 143.6 (s), 143.0 (s), 135.9 (s), 134.3 (s), 132.1 (s), 129.0 (s), 128.8 (s), 128.7 (s), 128.6 (s), 128.5 (s), 126.5 (s), 126.3 (s), 125.9 (s), 122.7 (s), 121.8 (s), 120.5 (s), 118.8 (s), 48.8 (s), 34.4 (s), 30.4 (s). HRMS (ESI) *m/z*: calcd. for C<sub>31</sub>H<sub>36</sub>NO [M+H]<sup>+</sup>: 438.2792, found: 438.2788.

#### 4-((3,5-Di-*tert*-butyl-4-hydroxyphenyl)(phenyl)methyl)-1,5-dimethyl-2-phenyl-1,2-dihydro-3H-pyrazol-3-one (**3y**)

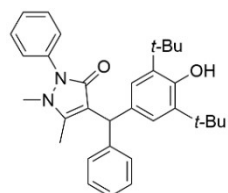

According to the general procedure, work-up and flash column chromatography (hexane/EtOAc: 20:1) gave product **3y** (55.1 mg, 0.11 mmol, 57%) as a yellow oil. <sup>1</sup>H NMR (400 MHz, CDCl<sub>3</sub>, 25 °C, TMS): δ = 7.39-7.46 (m, 4H), 7.16-7.28 (m, 6H), 7.03 (s, 2H), 5.42 (s, 1H), 5.08 (s, 1H), 2.99 (s, 3H), 1.86 (s, 3H), 1.38 (s, 18H); <sup>13</sup>C NMR (100 MHz, CDCl<sub>3</sub>, 25 °C, TMS): δ = 165.7 (s), 154.1 (s), 152.2 (s), 143.4 (s), 135.6 (s), 135.5 (s), 132.1 (s), 128.9 (s), 128.8 (s), 128.1 (s), 125.9 (s), 125.8 (s), 125.6 (s), 123.2 (s), 114.9 (s), 45.1 (s), 36.6 (s), 34.4 (s), 30.4 (s), 12.0 (s). HRMS (ESI) *m/z*: calcd. for C<sub>32</sub>H<sub>39</sub>N<sub>2</sub>O<sub>2</sub> [M+H]<sup>+</sup>: 483.3007, found: 483.3001.

#### 4-((4-Amino-3-(trifluoromethyl)phenyl)(phenyl)methyl)-2,6-di-*tert*-butylphenol (3z)

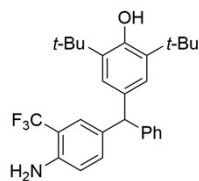

According to the general procedure, work-up and flash column chromatography (hexane/EtOAc: 10:1) gave product **3z** (72.1 mg, 0.16 mmol, 79%) as a yellow oil. <sup>1</sup>H NMR (400 MHz, CDCl<sub>3</sub>, 25 °C, TMS): δ = 7.17-7.28 (m, 4H), 7.02-7.10 (m, 3H), 6.88 (s, 2H), 6.64-6.66 (m, 1H), 5.34 (s, 1H), 5.09 (s, 1H), 4.05 (s, 2H), 1.36 (s, 18H); <sup>13</sup>C NMR (100 MHz, CDCl<sub>3</sub>, 25 °C, TMS): δ = 152.2 (s), 144.7 (s), 142.6 (s), 135.6 (s), 134.4 (s), 133.9 (s), 133.8 (s), 129.2 (s), 128.3 (s), 127.2 (d, *J*(C,F) = 5.1 Hz), 126.2 (s), 125.9 (s), 125.1 (d, *J*(C,F) = 270.7 Hz), 117.2 (s), 113.6 (d, *J*(C,F) = 29.5 Hz), 55.8 (s), 34.4 (s), 30.3 (s); <sup>19</sup>F NMR (376 MHz, CDCl<sub>3</sub>, 25 °C, TMS): δ = -62.5 (s). HRMS (ESI) *m/z*: calcd. for C<sub>28</sub>H<sub>33</sub>F<sub>3</sub>NO [M+H]<sup>+</sup>: 456.2509, found: 456.2505.

#### 2,6-Di-*tert*-butyl-4-(((2-nitrophenyl)amino)(phenyl)methyl)phenol (3aa')

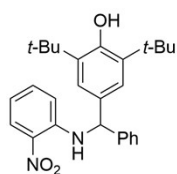

According to the general procedure, work-up and flash column chromatography (hexane/EtOAc: 30:1) gave product **3aa'** (75.3 mg, 0.17 mmol, 87%) as a yellow oil. <sup>1</sup>H NMR (400 MHz, CDCl<sub>3</sub>, 25 °C, TMS): δ = 8.63-8.64 (m, 1H), 8.18-8.20 (m, 1H), 7.24-7.39 (m, 6H), 7.09 (s, 2H), 6.72-6.74 (m, 1H), 6.60-6.65 (m, 1H), 5.66 (d, *J* = 5.6 Hz, 1H), 5.21 (s, 1H), 1.39 (s, 18H); <sup>13</sup>C NMR (100 MHz, CDCl<sub>3</sub>, 25 °C, TMS): δ = 153.4 (s), 144.4 (s), 141.7 (s), 136.3 (s), 136.1 (s), 132.3 (s), 132.2 (s), 128.9 (s), 127.5 (s), 126.9 (s), 126.8 (s), 124.1 (s), 115.7 (s), 115.4 (s), 62.1 (s), 34.4 (s), 30.2 (s). HRMS (ESI) *m/z*: calcd. for C<sub>27</sub>H<sub>33</sub>N<sub>2</sub>O<sub>3</sub> [M+H]<sup>+</sup>: 433.2486, found: 433.2481.

#### 2-(((3,5-Di-*tert*-butyl-4-hydroxyphenyl)(phenyl)methyl)amino)benzonitrile (3ab')

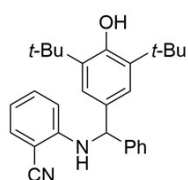

According to the general procedure, work-up and flash column chromatography (hexane/EtOAc: 20:1) gave product **3ab'** (66.9 mg, 0.16 mmol, 81%) as a yellow oil. <sup>1</sup>H NMR (400 MHz, CDCl<sub>3</sub>, 25 °C, TMS): δ = 7.31-7.41 (m, 5H), 7.20-7.28 (m, 2H), 7.04 (s, 2H), 6.64-6.66 (m, 1H), 6.49-6.51 (m, 1H), 5.53 (d, *J* = 4.8 Hz, 1H), 5.21 (s, 1H), 5.11 (d, *J* = 4.7 Hz, 1H), 1.38 (s, 18H); <sup>13</sup>C NMR (100 MHz, CDCl<sub>3</sub>, 25 °C, TMS): δ = 153.5 (s), 149.4 (s), 141.6 (s), 136.3 (s), 134.2 (s), 132.8 (s), 132.3 (s), 128.8 (s), 127.5 (s), 127.1 (s), 124.5 (s), 118.1 (s), 116.9 (s), 112.3 (s), 96.0 (s), 62.4 (s), 34.4 (s), 30.2 (s). HRMS (ESI) *m/z*: calcd. for C<sub>28</sub>H<sub>33</sub>N<sub>2</sub>O [M+H]<sup>+</sup>: 413.2588, found: 413.2584.

#### 2,6-Di-*tert*-butyl-4-(((3-nitrophenyl)amino)(phenyl)methyl)phenol (3ac')

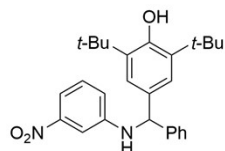

According to the general procedure, work-up and flash column chromatography (hexane/EtOAc: 30:1) gave product **3ac'** (73.6 mg, 0.17 mmol, 85%) as a yellow oil. <sup>1</sup>H NMR (400 MHz, CDCl<sub>3</sub>, 25 °C, TMS): δ = 7.46-7.48 (m, 1H), 7.32-7.40 (m, 5H), 7.17-7.27 (m, 2H), 7.08 (s, 2H), 6.77-6.80 (m, 1H), 5.48 (d, *J* = 4.4 Hz, 1H), 5.21 (s, 1H), 4.61 (d, *J* = 4.3 Hz, 1H), 1.39 (s, 18H); <sup>13</sup>C NMR (100 MHz, CDCl<sub>3</sub>, 25 °C, TMS): δ = 153.4 (s), 149.2 (s), 148.1 (s), 141.8 (s), 136.3 (s), 132.8 (s), 129.6 (s), 128.9 (s), 127.5 (s), 127.1 (s), 124.5 (s), 119.0 (s), 112.0 (s), 107.6 (s), 63.0 (s), 34.5 (s), 30.3 (s). HRMS (ESI) *m/z*: calcd. for C<sub>27</sub>H<sub>33</sub>N<sub>2</sub>O<sub>3</sub> [M+H]<sup>+</sup>: 433.2486, found: 433.2480.

#### 2,6-Di-*tert*-butyl-4-(((4-fluoro-3-(trifluoromethyl)phenyl)amino)(phenyl)methyl)phenol (**3ad'**)

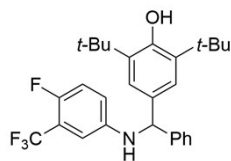

According to the general procedure, work-up and flash column chromatography (hexane/EtOAc: 40:1) gave product **3ad'** (76.7 mg, 0.17 mmol, 83%) as a yellow oil. <sup>1</sup>H NMR (400 MHz, CDCl<sub>3</sub>, 25 °C, TMS): δ = 7.30-7.39 (m, 4H), 7.21-7.26 (m, 1H), 7.08 (s, 2H), 6.86-6.90 (m, 1H), 6.71-6.73 (m, 1H), 6.55-6.59 (m, 1H), 5.35 (s, 1H), 5.19 (s, 1H), 4.31 (d, *J* = 2.1 Hz, 1H), 1.38 (s, 18H); <sup>13</sup>C NMR (100 MHz, CDCl<sub>3</sub>, 25 °C, TMS): δ = 153.3 (s), 152.1 (d, *J*(C,F) = 241.9 Hz), 143.7 (d, *J*(C,F) = 2.1 Hz), 142.2 (s), 136.2 (s), 133.2 (s), 127.4 (s), 127.0 (s), 124.5 (s), 122.8 (d, *J*(C,F) = 269.7 Hz), 117.3 (d, *J*(C,F) = 11.1 Hz), 117.2 (d, *J*(C,F) = 2.6 Hz), 111.2 (d, *J*(C,F) = 4.6 Hz), 63.6 (s), 34.5 (s), 30.3 (s); <sup>19</sup>F NMR (376 MHz, CDCl<sub>3</sub>, 25 °C, TMS): δ = -61.5 (d, *J* = 12.8 Hz), -130.7 (q, *J* = 12.7 Hz). HRMS (ESI) *m/z*: calcd. for C<sub>28</sub>H<sub>32</sub>F<sub>4</sub>NO [M+H]<sup>+</sup>: 474.2415, found: 474.2411.

#### 4-(((4-Bromo-3-(trifluoromethyl)phenyl)amino)(phenyl)methyl)-2,6-di-*tert*-butylphenol (**3ae'**)

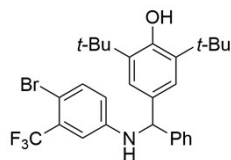

According to the general procedure, work-up and flash column chromatography (hexane/EtOAc: 40:1) gave product **3ae'** (82.2 mg, 0.15 mmol, 77%) as a yellow oil. <sup>1</sup>H NMR (400 MHz, CDCl<sub>3</sub>, 25 °C, TMS): δ = 7.30-7.37 (m, 5H), 7.20-7.26 (m, 1H), 7.06 (s, 2H), 6.87-6.88 (m, 1H), 6.44-6.47 (m, 1H), 5.38 (d, *J* = 4.1 Hz, 1H), 5.20 (s, 1H), 4.47 (d, *J* = 4.1 Hz, 1H), 1.38 (s, 18H); <sup>13</sup>C NMR (100 MHz, CDCl<sub>3</sub>, 25 °C, TMS): δ = 153.4 (s), 146.4 (s), 141.8 (s), 136.3 (s), 135.3 (s), 132.9 (s), 127.5 (s), 127.0 (s), 124.5 (s), 123.0 (d, *J*(C,F) = 271.6 Hz), 116.9 (s), 113.1 (d, *J*(C,F) = 5.7 Hz), 105.4 (s), 63.2 (s), 34.5 (s), 30.3 (s); <sup>19</sup>F NMR (376 MHz, CDCl<sub>3</sub>, 25 °C, TMS): δ = -62.7. HRMS (ESI) *m/z*: calcd. for C<sub>28</sub>H<sub>32</sub>BrF<sub>3</sub>NO [M+H]<sup>+</sup>: 534.1614, found: 534.1607.

#### 2,6-Di-*tert*-butyl-4-(((2-chloro-4-(trifluoromethyl)phenyl)amino)(phenyl)methyl)phenol (**3af'**)

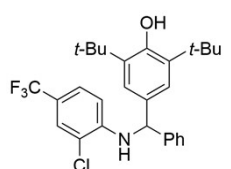

According to the general procedure, work-up and flash column chromatography (hexane/EtOAc: 40:1) gave product **3af'** (76.4 mg, 0.16 mmol, 78%) as a yellow oil. <sup>1</sup>H NMR (400 MHz, CDCl<sub>3</sub>, 25 °C, TMS): δ = 7.51-7.52 (m, 1H), 7.32-7.35 (m, 4H), 7.22-7.29 (m, 2H), 7.06 (s, 2H), 6.49-6.51 (m, 1H), 5.52 (d, *J* = 4.9 Hz, 1H), 5.22 (s), 5.21 (s), 1.38 (s, 18H); <sup>13</sup>C NMR (100 MHz, CDCl<sub>3</sub>, 25 °C, TMS): δ = 153.4 (s), 145.6 (s), 141.6 (s), 136.2 (s), 132.5 (s), 128.9 (s), 127.5 (s), 127.1 (s), 126.2 (d, *J*(C,F) = 3.8 Hz), 125.0 (d, *J*(C,F) = 3.7 Hz), 124.4 (s), 121.0 (d, *J*(C,F) = 365.8 Hz), 118.9 (s), 118.7 (s), 111.8 (s), 62.4 (s), 34.4 (s), 30.2 (s); <sup>19</sup>F NMR (376 MHz, CDCl<sub>3</sub>, 25 °C, TMS): δ = -61.1. HRMS (ESI) *m/z*: calcd. for C<sub>28</sub>H<sub>32</sub>ClF<sub>3</sub>NO [M+H]<sup>+</sup>: 490.2120, found: 490.2115.

#### 4-((4-Aminophenyl)(*p*-tolyl)methyl)-2,6-di-*tert*-butylphenol (**4a**)

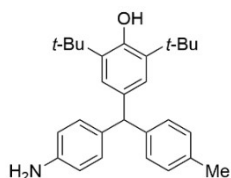

According to the general procedure, work-up and flash column chromatography (hexane/EtOAc: 10:1) gave product **4a** (65.1 mg, 0.16 mmol, 81%) as a yellow solid. mp: 147.3-147.5 °C. <sup>1</sup>H NMR (400 MHz, CDCl<sub>3</sub>, 25 °C, TMS): δ = 6.98-7.06 (m, 4H), 6.87-6.91 (m, 4H), 6.57-6.60 (m, 2H), 5.28 (s, 1H), 5.04 (s, 1H), 3.43 (s, 2H), 2.30 (s, 3H), 1.35 (s, 18H); <sup>13</sup>C NMR (100 MHz, CDCl<sub>3</sub>, 25 °C, TMS): δ = 151.9 (s), 144.2 (s), 142.5 (s), 135.4 (s), 135.3 (s), 135.2 (s), 134.9 (s), 130.2 (s), 129.2 (s), 128.8 (s), 126.0 (s), 115.0 (s), 55.7 (s), 34.4 (s), 30.4 (s), 21.1 (s). HRMS (ESI) *m/z*: calcd. for C<sub>28</sub>H<sub>36</sub>NO [M+H]<sup>+</sup>: 402.2792, found: 402.2786.

#### 4-((4-Aminophenyl)(*o*-tolyl)methyl)-2,6-di-*tert*-butylphenol (4b)

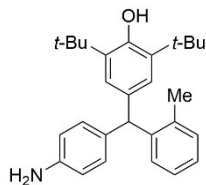

According to the general procedure, work-up and flash column chromatography (hexane/EtOAc: 10:1) gave product **4b** (68.3 mg, 0.17 mmol, 83%) as a yellow solid. mp: 147.3-147.5 °C. <sup>1</sup>H NMR (400 MHz, CDCl<sub>3</sub>, 25 °C, TMS): δ = 7.06-7.13 (m, 3H), 6.82-6.84 (m, 5H), 6.57-6.61 (m, 2H), 5.44 (s, 1H), 5.04 (s, 1H), 3.29 (s, 2H), 2.21 (s, 3H), 1.35 (s, 18H); <sup>13</sup>C NMR (100 MHz, CDCl<sub>3</sub>, 25 °C, TMS): δ = 151.9 (s), 144.1 (s), 143.8 (s), 136.6 (s), 135.3 (s), 134.4 (s), 134.2 (s), 130.3 (s), 130.2 (s), 129.2 (s), 126.2 (s), 125.9 (s), 125.5 (s), 115.1 (s), 52.6 (s), 34.3 (s), 30.4 (s), 20.0 (s). HRMS (ESI) *m/z*: calcd. for C<sub>28</sub>H<sub>36</sub>NO [M+H]<sup>+</sup>: 402.2792, found: 402.2787.

#### 4-((4-Aminophenyl)(4-ethylphenyl)methyl)-2,6-di-*tert*-butylphenol (4c)

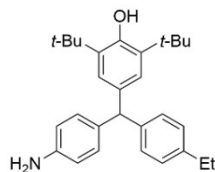

According to the general procedure, work-up and flash column chromatography (hexane/EtOAc: 10:1) gave product **4c** (69.9 mg, 0.41 mmol, 84%) as a yellow oil. <sup>1</sup>H NMR (400 MHz, CDCl<sub>3</sub>, 25 °C, TMS): δ = 7.07-7.09 (m, 2H), 7.00-7.02 (m, 2H), 6.88-6.91 (m, 4H), 6.58-6.60 (m, 2H), 5.29 (s, 1H), 5.04 (s, 1H), 3.54 (s, 2H), 2.58-2.63 (m, 2H), 1.35 (s, 18H), 1.21 (t, *J* = 7.6 Hz, 3H); <sup>13</sup>C NMR (100 MHz, CDCl<sub>3</sub>, 25 °C, TMS): δ = 151.9 (s), 144.2 (s), 142.7 (s), 141.6 (s), 135.5 (s), 135.3 (s), 134.9 (s), 130.2 (s), 129.2 (s), 127.5 (s), 126.0 (s), 115.1 (s), 55.8 (s), 34.4 (s), 30.4 (s), 28.5 (s), 15.6 (s). HRMS (ESI) *m/z*: calcd. for C<sub>29</sub>H<sub>38</sub>NO [M+H]<sup>+</sup>: 416.2948, found: 416.2941.

#### 4-((4-Aminophenyl)(4-(*tert*-butyl)phenyl)methyl)-2,6-di-*tert*-butylphenol (4d)

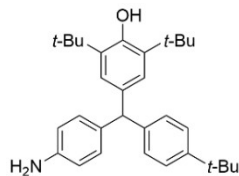

According to the general procedure, work-up and flash column chromatography (hexane/EtOAc: 10:1) gave product **4d** (71.0 mg, 0.16 mmol, 80%) as a yellow solid. mp: 145.2-145.5 °C. <sup>1</sup>H NMR (400 MHz, CDCl<sub>3</sub>, 25 °C, TMS): δ = 7.22-7.27 (m, 2H), 7.02-7.03 (m, 2H), 6.89-6.91 (m, 4H), 6.57-6.60 (m, 2H), 5.28 (s, 1H), 5.03 (s, 1H), 3.53 (s, 2H), 1.36 (s, 18H), 1.29 (s, 9H); <sup>13</sup>C NMR (100 MHz, CDCl<sub>3</sub>, 25 °C, TMS): δ = 151.9 (s), 148.5 (s), 144.3 (s), 142.3 (s), 135.5 (s), 135.3 (s), 134.9 (s), 130.2 (s), 128.9 (s), 126.0 (s), 124.9 (s), 115.0 (s), 55.7 (s), 34.4 (s), 31.5 (s), 30.4 (s). HRMS (ESI) *m/z*: calcd. for C<sub>31</sub>H<sub>42</sub>NO [M+H]<sup>+</sup>: 444.3261, found: 444.3255.

#### 4-((4-Aminophenyl)(3-methoxyphenyl)methyl)-2,6-di-*tert*-butylphenol (4e)

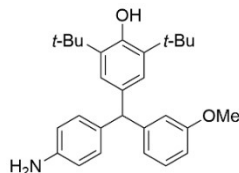

According to the general procedure, work-up and flash column chromatography (hexane/EtOAc: 10:1) gave product **4e** (71.9 mg, 0.17 mmol, 83%) as a yellow solid. mp: 108.1-108.5 °C. <sup>1</sup>H NMR (400 MHz, CDCl<sub>3</sub>, 25 °C, TMS): δ = 7.15-7.19 (m, 1H), 6.88-6.91 (m, 4H), 6.67-6.72 (m, 3H), 6.58-6.60 (m, 2H), 5.29 (s, 1H), 5.05 (s, 1H), 3.73 (s, 3H), 3.47 (s, 2H), 1.36 (s, 18H); <sup>13</sup>C NMR (100 MHz, CDCl<sub>3</sub>, 25 °C, TMS): δ = 159.4 (s), 152.0 (s), 147.1 (s), 144.3 (s), 135.3 (s), 135.0 (s), 134.5 (s), 130.2 (s), 128.9 (s), 126.0 (s), 122.0 (s), 115.3 (s), 115.1 (s), 111.1 (s), 56.1 (s), 55.1 (s), 34.4 (s), 30.4 (s). HRMS (ESI) *m/z*: calcd. for C<sub>28</sub>H<sub>36</sub>NO<sub>2</sub> [M+H]<sup>+</sup>: 418.2741, found: 418.2734.

#### 4-((4-Aminophenyl)(4-isopropoxyphenyl)methyl)-2,6-di-*tert*-butylphenol (4f)

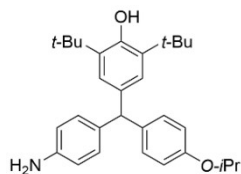

According to the general procedure, work-up and flash column chromatography (hexane/EtOAc: 10:1) gave product **4f** (73.1 mg, 0.16 mmol, 82%) as a yellow solid. mp: 120.6-120.8 °C. <sup>1</sup>H NMR (400 MHz, CDCl<sub>3</sub>, 25 °C, TMS): δ = 6.98-7.00 (m, 2H), 6.88-6.90 (m, 4H), 6.76-6.79 (m, 2H), 6.59-6.61 (m, 2H), 5.26 (s, 1H), 5.04 (s, 1H), 6.45-6.54 (m, 1H), 3.55 (s, 2H), 1.35 (s, 18H), 1.31 (d, *J* = 6.1 Hz, 6H); <sup>13</sup>C NMR (100 MHz, CDCl<sub>3</sub>, 25 °C, TMS): δ = 156.0 (s), 151.9 (s), 144.2 (s), 137.5 (s), 135.6 (s), 135.3 (s), 135.1 (s), 130.2 (s), 130.1 (s), 125.9 (s), 115.5 (s), 115.0 (s), 69.9 (s), 55.2 (s), 34.3 (s), 30.4 (s), 22.1 (s). HRMS (ESI) *m/z*: calcd. for C<sub>30</sub>H<sub>40</sub>NO<sub>2</sub> [M+H]<sup>+</sup>: 446.3054, found: 446.3050.

#### 4-((4-Aminophenyl)(4-(benzyloxy)phenyl)methyl)-2,6-di-*tert*-butylphenol (4g)

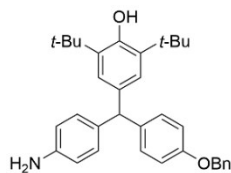

According to the general procedure, work-up and flash column chromatography (hexane/EtOAc: 10:1) gave product **4g** (82.1 mg, 0.17 mmol, 83%) as a yellow oil. <sup>1</sup>H NMR (400 MHz, CDCl<sub>3</sub>, 25 °C, TMS): δ = 7.41-7.43 (m, 2H), 7.34-7.38 (m, 2H), 7.28-7.32 (m, 1H), 7.00-7.02 (m, 2H), 6.86-6.89 (m, 6H), 6.58-6.60 (m, 2H), 5.28 (s, 1H), 5.04 (s, 1H), 5.02 (s, 2H), 3.54 (s, 2H), 1.35 (s, 18H); <sup>13</sup>C NMR (100 MHz, CDCl<sub>3</sub>, 25 °C, TMS): δ = 157.0 (s), 151.9 (s), 144.3 (s), 138.0 (s), 137.3 (s), 135.5 (s), 135.3 (s), 135.0 (s), 130.3 (s), 130.1 (s), 128.6 (s), 127.9 (s), 127.6 (s), 125.9 (s), 115.0 (s), 114.4 (s), 70.1 (s), 55.3 (s), 34.4 (s), 30.4 (s). HRMS (ESI) *m/z*: calcd. for C<sub>34</sub>H<sub>40</sub>NO<sub>2</sub> [M+H]<sup>+</sup>: 494.3054, found: 494.3049.

#### 4-((4-Aminophenyl)(2-hydroxyphenyl)methyl)-2,6-di-*tert*-butylphenol (4h)

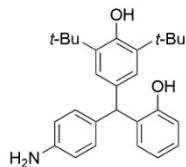

According to the general procedure, work-up and flash column chromatography (hexane/EtOAc: 2:1) gave product **4h** (58.2 mg, 0.14 mmol, 72%) as a yellow oil. <sup>1</sup>H NMR (400 MHz, DMSO-*d*<sub>6</sub>, 25 °C, TMS): δ = 9.21 (s, 1H), 6.95-6.99 (m, 1H), 6.81-6.82 (m, 2H), 6.74-6.77 (m, 2H), 6.67-6.72 (m, 4H), 6.44-6.46 (m, 2H), 5.52 (s, 1H), 4.83 (s, 2H), 1.29 (s, 18H); <sup>13</sup>C NMR (100 MHz, DMSO-*d*<sub>6</sub>, 25 °C, TMS): δ = 154.9 (s), 152.0 (s), 146.8 (s), 138.9 (s), 135.9 (s), 132.2 (s), 132.1 (s), 130.1 (s), 129.9 (s), 127.0 (s), 125.6 (s), 118.9 (s), 115.4 (s), 114.1 (s), 48.4 (s), 34.9 (s), 30.9 (s). HRMS (ESI) *m/z*: calcd. for C<sub>27</sub>H<sub>34</sub>NO<sub>2</sub> [M+H]<sup>+</sup>: 404.2585, found: 404.2578.

#### 4-((4-Aminophenyl)(4-hydroxy-3-methoxyphenyl)methyl)-2,6-di-*tert*-butylphenol (4i)

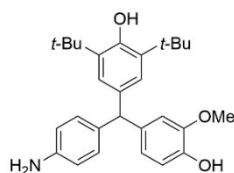

According to the general procedure, work-up and flash column chromatography (hexane/EtOAc: 2:1) gave product **4i** (66.1 mg, 0.15 mmol, 76%) as a yellow solid. mp: 114.2-114.5 °C. <sup>1</sup>H NMR (400 MHz, CDCl<sub>3</sub>, 25 °C, TMS): δ = 6.79-6.91 (m, 5H), 6.47-6.74 (m, 5H), 5.25 (s, 1H), 5.05 (s, 1H), 3.76 (s, 3H), 3.69 (s, 2H), 1.36 (s, 18H); <sup>13</sup>C NMR (100 MHz, CDCl<sub>3</sub>, 25 °C, TMS): δ = 151.9 (s), 146.2 (s), 144.2 (s), 143.7 (s), 137.5 (s), 135.5 (s), 135.3 (s), 134.9 (s), 130.1 (s), 125.9 (s), 122.1 (s), 115.1 (s), 113.9 (s), 112.1 (s), 55.9 (s), 55.7 (s), 34.4 (s), 30.4 (s). HRMS (ESI) *m/z*: calcd. for C<sub>28</sub>H<sub>36</sub>NO<sub>3</sub> [M+H]<sup>+</sup>: 434.2690, found: 434.2685.



#### 4-((4-Aminophenyl)(2,5-dimethoxyphenyl)methyl)-2,6-di-*tert*-butylphenol (4j)

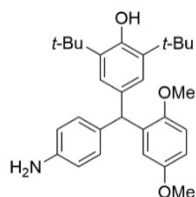

According to the general procedure, work-up and flash column chromatography (hexane/EtOAc: 5:1) gave product **4j** (79.3 mg, 0.17 mmol, 83%) as a yellow solid. mp: 126.8-127.2 °C. <sup>1</sup>H NMR (400 MHz, CDCl<sub>3</sub>, 25 °C, TMS): δ = 6.86-6.89 (m, 4H), 6.76-6.78 (m, 1H), 6.67-6.70 (m, 1H), 6.56-6.58 (m, 2H), 6.49-6.50 (m, 1H), 5.67 (s, 1H), 5.03 (s, 1H), 3.66 (s, 3H), 3.63 (s, 3H), 3.53 (s, 3H), 1.35 (s, 18H); <sup>13</sup>C NMR (100 MHz, CDCl<sub>3</sub>, 25 °C, TMS): δ = 153.3 (s), 151.9 (s), 151.6 (s), 144.1 (s), 135.7 (s), 135.2 (s), 134.7 (s), 134.4 (s), 130.1 (s), 126.1 (s), 117.0 (s), 115.0 (s), 112.0 (s), 110.9 (s), 56.6 (s), 55.6 (s), 48.8 (s), 34.4 (s), 30.4 (s). HRMS (ESI) *m/z*: calcd. for C<sub>29</sub>H<sub>38</sub>NO<sub>3</sub> [M+H]<sup>+</sup>: 478.2847, found: 478.2840.

#### 4-((4-Aminophenyl)(3-nitrophenyl)methyl)-2,6-di-*tert*-butylphenol (4k)

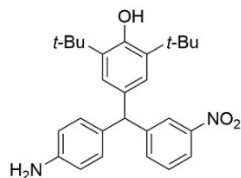

According to the general procedure, work-up and flash column chromatography (hexane/EtOAc: 5:1) gave product **4k** (50.2 mg, 0.12 mmol, 58%) as a yellow oil. <sup>1</sup>H NMR (400 MHz, CDCl<sub>3</sub>, 25 °C, TMS): δ = 8.01-8.06 (m, 2H), 7.40-7.47 (m, 2H), 6.86-6.88 (m, 4H), 6.62-6.64 (m, 2H), 5.42 (s, 1H), 5.12 (s, 1H), 3.64 (s, 2H), 1.36 (s, 18H); <sup>13</sup>C NMR (100 MHz, CDCl<sub>3</sub>, 25 °C, TMS): δ = 152.4 (s), 147.8 (s), 144.9 (s), 144.6 (s), 135.8 (s), 135.5 (s), 133.4 (s), 133.2 (s), 130.1 (s), 128.9 (s), 125.8 (s), 124.2 (s), 121.2 (s), 115.2 (s), 55.7 (s), 34.4 (s), 30.3 (s). HRMS (ESI) *m/z*: calcd. for C<sub>27</sub>H<sub>33</sub>N<sub>2</sub>O<sub>3</sub> [M+H]<sup>+</sup>: 433.2486, found: 433.2482.

#### 4-((4-Aminophenyl)(4-(trifluoromethyl)phenyl)methyl)-2,6-di-*tert*-butylphenol (4l)

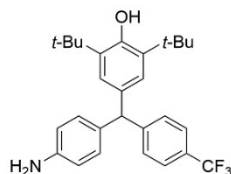

According to the general procedure, work-up and flash column chromatography (hexane/EtOAc: 5:1) gave product **4l** (55.6 mg, 0.12 mmol, 61%) as a yellow oil. <sup>1</sup>H NMR (400 MHz, CDCl<sub>3</sub>, 25 °C, TMS): δ = 7.49-7.51 (m, 2H), 7.21-7.23 (m, 2H), 6.85-6.87 (m, 4H), 6.61-6.63 (m, 2H), 5.37 (s, 1H), 5.09 (s, 1H), 3.61 (s, 2H), 1.36 (s, 18H); <sup>13</sup>C NMR (100 MHz, CDCl<sub>3</sub>, 25 °C, TMS): δ = 152.2 (s), 149.7 (s), 144.7 (s), 135.6 (s), 134.0 (s), 133.8 (s), 130.2 (s), 129.6 (s), 127.1 (d, *J*(C,F) = 239.4 Hz), 125.9 (s), 125.0 (d, *J*(C,F) = 11.1 Hz), 124.9 (d, *J*(C,F) = 3.8 Hz), 115.1 (s), 55.9 (s), 34.4 (s), 30.3 (s); <sup>19</sup>F NMR (376 MHz, CDCl<sub>3</sub>, 25 °C, TMS): δ = -62.2 (s). HRMS (ESI) *m/z*: calcd. for C<sub>28</sub>H<sub>33</sub>F<sub>3</sub>NO [M+H]<sup>+</sup>: 456.2509, found: 456.2503.

#### 4-((4-Aminophenyl)(3-fluorophenyl)methyl)-2,6-di-*tert*-butylphenol (4m)

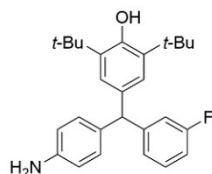

According to the general procedure, work-up and flash column chromatography (hexane/EtOAc: 5:1) gave product **4m** (57.7 mg, 0.14 mmol, 71%) as a yellow oil. <sup>1</sup>H NMR (400 MHz, CDCl<sub>3</sub>, 25 °C, TMS): δ = 7.18-7.23 (m, 2H), 6.78-6.91 (m, 7H), 6.60-6.62 (m, 2H), 5.32 (s, 1H), 5.07 (s, 1H), 3.58 (s, 2H), 1.36 (s, 18H); <sup>13</sup>C NMR (100 MHz, CDCl<sub>3</sub>, 25 °C, TMS): δ = 162.8 (d, *J*(C,F) = 243.4 Hz), 152.1 (s), 148.3 (d, *J*(C,F) = 6.5 Hz), 135.5 (s), 134.1 (s), 130.1 (s), 129.3 (d, *J*(C,F) = 8.3 Hz), 125.9 (s), 125.0 (d, *J*(C,F) = 2.7 Hz), 116.3 (s), 116.1 (s), 115.1 (s), 112.8 (s), 112.6 (s), 55.8 (s), 34.4 (s), 30.3 (s); <sup>19</sup>F NMR (376 MHz, CDCl<sub>3</sub>, 25 °C, TMS): δ = -113.9 (s). HRMS (ESI) *m/z*: calcd. for C<sub>27</sub>H<sub>33</sub>FNO [M+H]<sup>+</sup>: 406.2541, found: 406.2537.

#### 4-((4-Aminophenyl)(2-fluorophenyl)methyl)-2,6-di-*tert*-butylphenol (4n)

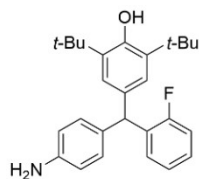

According to the general procedure, work-up and flash column chromatography (hexane/EtOAc: 5:1) gave product **4n** (60.1 mg, 0.15 mmol, 74%) as a yellow solid. mp: 132.2-132.4 °C. <sup>1</sup>H NMR (400 MHz, CDCl<sub>3</sub>, 25 °C, TMS): δ = 7.14-7.19 (m, 1H), 6.93-7.04 (m, 3H), 6.87-6.89 (m, 4H), 6.59-6.62 (m, 2H), 5.63 (s, 1H), 5.06 (s, 1H), 3.57 (s, 2H), 1.35 (s, 18H); <sup>13</sup>C NMR (100 MHz, CDCl<sub>3</sub>, 25 °C, TMS): δ = 160.7 (d, *J*(C,F) = 244.5 Hz), 144.5 (s), 135.4 (s), 133.7 (s), 133.3 (s), 132.5 (d, *J*(C,F) = 14.3 Hz), 130.8 (d, *J*(C,F) = 4.2 Hz), 130.0 (s), 127.6 (d, *J*(C,F) = 8.1 Hz), 125.9 (s), 123.6 (d, *J*(C,F) = 3.5 Hz), 115.3 (s), 115.1 (s), 115.0 (s), 48.3 (s), 34.3 (s), 30.3 (s); <sup>19</sup>F NMR (376 MHz, CDCl<sub>3</sub>, 25 °C, TMS): δ = -116.8 (s). HRMS (ESI) *m/z*: calcd. for C<sub>27</sub>H<sub>33</sub>FNO [M+H]<sup>+</sup>: 406.2541, found: 406.2535.

#### 4-((4-Aminophenyl)(4-fluorophenyl)methyl)-2,6-di-*tert*-butylphenol (4o)

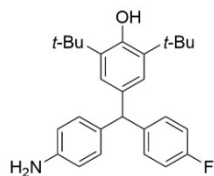

According to the general procedure, work-up and flash column chromatography (hexane/EtOAc: 10:1) gave product **4o** (58.8 mg, 0.14 mmol, 72%) as a white solid. mp: 126.6-126.9 °C. <sup>1</sup>H NMR (400 MHz, CDCl<sub>3</sub>, 25 °C, TMS): δ = 7.03-7.07 (m, 2H), 6.90-6.96 (m, 2H), 6.85-6.87 (m, 4H), 6.59-6.62 (m, 2H), 5.31 (s, 1H), 5.06 (s, 1H), 3.58 (s, 2H), 1.35 (s, 18H); <sup>13</sup>C NMR (100 MHz, CDCl<sub>3</sub>, 25 °C, TMS): δ = 161.2 (d, *J*(C,F) = 242.4 Hz), 144.4 (s), 141.2 (s), 135.4 (s), 134.9 (s), 134.6 (s), 130.7 (d, *J*(C,F) = 7.8 Hz), 130.1 (s), 125.9 (s), 115.1 (s), 114.9 (s), 114.7 (s), 55.3 (s), 34.4 (s), 30.4 (s); <sup>19</sup>F NMR (376 MHz, CDCl<sub>3</sub>, 25 °C, TMS): δ = -117.8 (s). HRMS (ESI) *m/z*: calcd. for C<sub>27</sub>H<sub>33</sub>FNO [M+H]<sup>+</sup>: 406.2541, found: 406.2533.

#### 4-((4-Aminophenyl)(3-bromophenyl)methyl)-2,6-di-*tert*-butylphenol (4p)

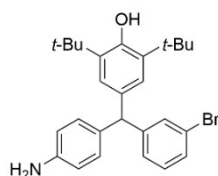

According to the general procedure, work-up and flash column chromatography (hexane/EtOAc: 10:1) gave product **4p** (75.5 mg, 0.16 mmol, 81%) as a yellow oil. <sup>1</sup>H NMR (400 MHz, CDCl<sub>3</sub>, 25 °C, TMS): δ = 7.28-7.31 (m, 2H), 7.10-7.14 (m, 1H), 7.02-7.03 (m, 1H), 6.85-6.87 (m, 4H), 6.60-6.62 (m, 2H), 5.28 (s, 1H), 5.08 (s, 1H), 3.60 (s, 2H), 1.36 (s, 18H); <sup>13</sup>C NMR (100 MHz, CDCl<sub>3</sub>, 25 °C, TMS): δ = 152.2 (s), 147.9 (s), 144.6 (s), 135.5 (s), 134.2 (s), 133.9 (s), 132.4 (s), 130.1 (s), 129.6 (s), 129.0 (s), 128.0 (s), 125.9 (s), 122.3 (s), 115.1 (s), 55.7 (s), 34.4 (s), 30.3 (s). HRMS (ESI) *m/z*: calcd. for C<sub>27</sub>H<sub>33</sub>BrNO [M+H]<sup>+</sup>: 466.1741, found: 466.1735.

#### 4-((4-Aminophenyl)(2-bromophenyl)methyl)-2,6-di-*tert*-butylphenol (4q)

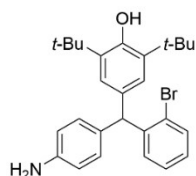

According to the general procedure, work-up and flash column chromatography (hexane/EtOAc: 10:1) gave product **4q** (74.6 mg, 0.16 mmol, 80%) as a yellow oil. <sup>1</sup>H NMR (400 MHz, CDCl<sub>3</sub>, 25 °C, TMS): δ = 7.52-7.55 (m, 1H), 7.14-7.21 (m, 1H), 7.02-7.06 (m, 1H), 6.96-6.98 (m, 1H), 6.84-6.86 (m, 3H), 6.68-6.78 (m, 1H), 6.60-6.62 (m, 2H), 5.72 (s, 1H), 5.02 (s, 1H), 3.59 (s, 2H), 1.35 (s, 18H); <sup>13</sup>C NMR (100 MHz, CDCl<sub>3</sub>, 25 °C, TMS): δ = 152.1 (s), 135.4 (s), 133.5 (s), 131.2 (s), 130.4 (s), 127.5 (s), 127.0 (s), 126.2 (s), 125.5 (s), 125.3 (s), 115.06 (s), 55.0 (s), 34.3 (s), 30.4 (s). HRMS (ESI) *m/z*: calcd. for C<sub>27</sub>H<sub>33</sub>BrNO [M+H]<sup>+</sup>: 466.1741, found: 466.1737.

#### 4-((4-Aminophenyl)(4-bromophenyl)methyl)-2,6-di-*tert*-butylphenol (4r)

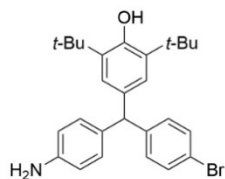

According to the general procedure, work-up and flash column chromatography (hexane/EtOAc: 10:1) gave product **4r** (77.4 mg, 0.17 mmol, 83%) as a yellow oil. <sup>1</sup>H NMR (400 MHz, CDCl<sub>3</sub>, 25 °C, TMS): δ = 7.35-7.38 (m, 2H), 6.96-6.98 (m, 2H), 6.86-6.88 (m, 4H), 6.65-6.67 (m, 2H), 5.27 (s, 1H), 5.08 (s, 1H), 3.66 (s, 2H), 1.35 (s, 18H); <sup>13</sup>C NMR (100 MHz, CDCl<sub>3</sub>, 25 °C, TMS): δ = 152.1 (s), 144.5 (s), 135.5 (s), 134.0 (s), 131.2 (s), 131.1 (s), 130.16 (s), 125.9 (s), 119.7 (s), 115.8 (s), 55.5 (s), 34.4 (s), 30.3 (s). HRMS (ESI) *m/z*: calcd. for C<sub>27</sub>H<sub>33</sub>BrNO [M+H]<sup>+</sup>: 466.1741, found: 466.1733.

#### 4-((4-Aminophenyl)(3,5-di-*tert*-butyl-4-hydroxyphenyl)methyl)benzonitrile (4s)

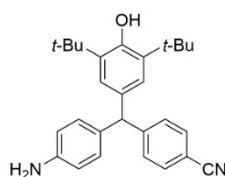

According to the general procedure, work-up and flash column chromatography (hexane/EtOAc: 5:1) gave product **4s** (55.3 mg, 0.13 mmol, 67%) as a yellow oil. <sup>1</sup>H NMR (400 MHz, CDCl<sub>3</sub>, 25 °C, TMS): δ = 7.45-7.49 (m, 1H), 7.33-7.39 (m, 3H), 6.83-6.85 (m, 4H), 6.62-6.64 (m, 2H), 5.35 (s, 1H), 5.12 (s, 1H), 3.66 (s, 2H), 1.36 (s, 18H); <sup>13</sup>C NMR (100 MHz, CDCl<sub>3</sub>, 25 °C, TMS): δ = 152.4 (s), 147.2 (s), 144.8 (s), 135.7 (s), 133.9 (s), 133.3 (s), 132.8 (s), 130.1 (s), 129.8 (s), 128.8 (s), 125.8 (s), 115.2 (s), 112.0 (s), 55.6 (s), 34.4 (s), 30.3 (s). HRMS (ESI) *m/z*: calcd. for C<sub>28</sub>H<sub>33</sub>N<sub>2</sub>O [M+H]<sup>+</sup>: 413.2588, found: 413.2583.

#### 3-((4-Aminophenyl)(3,5-di-*tert*-butyl-4-hydroxyphenyl)methyl)benzonitrile (4t)

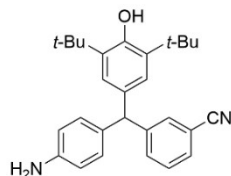

According to the general procedure, work-up and flash column chromatography (hexane/EtOAc: 5:1) gave product **4t** (57.1 mg, 0.14 mmol, 69%) as a yellow oil. <sup>1</sup>H NMR (400 MHz, CDCl<sub>3</sub>, 25 °C, TMS): δ = 7.53-7.56 (m, 2H), 7.20-7.22 (m, 2H), 6.83-6.85 (m, 4H), 6.61-6.63 (m, 2H), 5.36 (s, 1H), 5.11 (s, 1H), 3.65 (s, 2H), 1.35 (s, 18H); <sup>13</sup>C NMR (100 MHz, CDCl<sub>3</sub>, 25 °C, TMS): δ = 152.3 (s), 151.3 (s), 144.8 (s), 135.7 (s), 133.4 (s), 133.3 (s), 132.0 (s), 131.9 (s), 130.2 (s), 130.1 (s), 125.8 (s), 125.7 (s), 119.2 (s), 115.2 (s), 109.7 (s), 56.1 (s), 34.4 (s), 30.3 (s). HRMS (ESI) *m/z*: calcd. for C<sub>28</sub>H<sub>33</sub>N<sub>2</sub>O [M+H]<sup>+</sup>: 413.2588, found: 413.2581.

#### 4-((4-Aminophenyl)(thiophen-3-yl)methyl)-2,6-di-*tert*-butylphenol (4u)

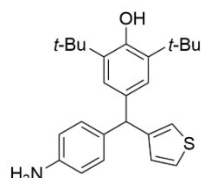

According to the general procedure, work-up and flash column chromatography (hexane/EtOAc: 10:1) gave product **4u** (60.2 mg, 0.15 mmol, 76%) as a yellow oil. <sup>1</sup>H NMR (400 MHz, CDCl<sub>3</sub>, 25 °C, TMS): δ = 7.21-7.23 (m, 1H), 6.92-6.94 (m, 4H), 6.85-6.86 (m, 1H), 6.70-6.71 (m, 1H), 6.60-6.62 (m, 2H), 5.28 (s, 1H), 5.05 (s, 1H), 3.57 (s, 2H), 1.37 (s, 18H); <sup>13</sup>C NMR (100 MHz, CDCl<sub>3</sub>, 25 °C, TMS): δ = 152.1 (s), 146.6 (s), 144.4 (s), 135.4 (s), 135.0 (s), 134.8 (s), 129.7 (s), 129.0 (s), 125.5 (s), 125.0 (s), 122.1 (s), 115.1 (s), 51.8 (s), 34.3 (s), 30.4 (s). HRMS (ESI) *m/z*: calcd. for C<sub>25</sub>H<sub>32</sub>NOS [M+H]<sup>+</sup>: 394.2200, found: 394.2196.

#### 4-((4-Aminophenyl)(thiophen-2-yl)methyl)-2,6-di-*tert*-butylphenol (4v)

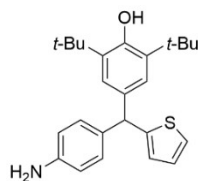

According to the general procedure, work-up and flash column chromatography (hexane/EtOAc: 10:1) gave product **4v** (56.7 mg, 0.14 mmol, 72%) as a yellow solid. mp: 104.5-104.8 °C. <sup>1</sup>H NMR (400 MHz, CDCl<sub>3</sub>, 25 °C, TMS): δ = 7.15-7.16 (m, 1H), 6.98-7.01 (m, 4H), 6.89-6.91 (m, 1H), 6.66-6.67 (m, 1H), 6.60-6.62 (m, 2H), 5.45 (s, 1H), 5.08 (s, 1H), 3.58 (s, 2H), 1.37 (s, 18H); <sup>13</sup>C NMR (100 MHz, CDCl<sub>3</sub>, 25 °C, TMS): δ = 152.3 (s), 150.1 (s), 144.7 (s), 135.4 (s), 135.1 (s), 134.7 (s), 129.6 (s), 126.4 (s), 125.8 (s), 125.4 (s), 124.1 (s), 115.1 (s), 51.5 (s), 34.4 (s), 30.4 (s). HRMS (ESI) *m/z*: calcd. for C<sub>25</sub>H<sub>32</sub>NOS [M+H]<sup>+</sup>: 394.2200, found: 394.2193.

#### 4-((4-Aminophenyl)(5-methylfuran-2-yl)methyl)-2,6-di-*tert*-butylphenol (4w)

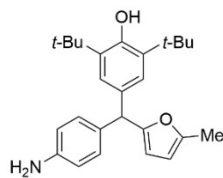

According to the general procedure, work-up and flash column chromatography (hexane/EtOAc: 10:1) gave product **4w** (54.1 mg, 0.14 mmol, 69%) as a yellow oil. <sup>1</sup>H NMR (400 MHz, CDCl<sub>3</sub>, 25 °C, TMS): δ = 6.94-6.97 (m, 4H), 6.59-6.61 (m, 2H), 5.84-5.85 (m, 1H), 5.70-5.71 (m, 1H), 5.17 (s, 1H), 3.42 (s, 2H), 2.23 (s, 3H), 1.37 (s, 18H); <sup>13</sup>C NMR (100 MHz, CDCl<sub>3</sub>, 25 °C, TMS): δ = 156.4 (s), 152.3 (s), 151.0 (s), 144.6 (s), 135.4 (s), 133.1 (s), 133.0 (s), 129.6 (s), 125.3 (s), 115.2 (s), 108.5 (s), 105.8 (s), 50.1 (s), 34.4 (s), 30.4 (s), 13.7 (s). HRMS (ESI) *m/z*: calcd. for C<sub>26</sub>H<sub>34</sub>NO<sub>2</sub> [M+H]<sup>+</sup>: 392.2585, found: 392.2579.

#### 4-((4-Aminophenyl)(2,3-dihydrobenzofuran-6-yl)methyl)-2,6-di-*tert*-butylphenol (4x)

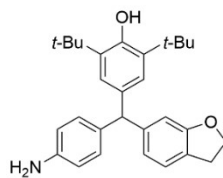

According to the general procedure, work-up and flash column chromatography (hexane/EtOAc: 5:1) gave product **4x** (62.8 mg, 0.15 mmol, 73%) as a yellow oil. <sup>1</sup>H NMR (400 MHz, CDCl<sub>3</sub>, 25 °C, TMS): δ = 6.87-6.94 (m, 5H), 6.81-6.83 (m, 1H), 6.65-6.67 (m, 1H), 6.58-6.60 (m, 2H), 5.26 (s, 1H), 5.04 (s, 1H), 4.52 (t, *J* = 8.7, 2H), 3.54 (s, 2H), 3.12 (t, *J* = 8.6, 2H), 1.36 (s, 18H); <sup>13</sup>C NMR (100 MHz, CDCl<sub>3</sub>, 25 °C, TMS): δ = 158.2 (s), 151.9 (s), 144.2 (s), 137.7 (s), 135.7 (s), 135.3 (s), 135.2 (s), 130.1 (s), 128.8 (s), 126.7 (s), 125.9 (s), 125.8 (s), 115.0 (s), 108.6 (s), 71.2 (s), 55.5 (s), 34.4 (s), 30.4 (s), 29.9 (s). HRMS (ESI) *m/z*: calcd. for C<sub>29</sub>H<sub>36</sub>NO<sub>2</sub> [M+H]<sup>+</sup>: 430.2741, found: 430.2735.

#### 4-((4-Aminophenyl)(pyridin-2-yl)methyl)-2,6-di-*tert*-butylphenol (4y)

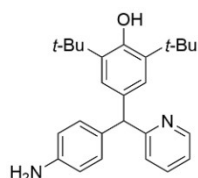

According to the general procedure, work-up and flash column chromatography (hexane/EtOAc: 5:1) gave product **4y** (58.3 mg, 0.15 mmol, 75%) as a yellow oil. <sup>1</sup>H NMR (400 MHz, CDCl<sub>3</sub>, 25 °C, TMS): δ = 8.57-8.58 (m, 1H), 7.55-7.60 (m, 1H), 7.05-7.11 (m, 2H), 6.93-6.95 (m, 4H), 6.61-6.63 (m, 2H), 5.49 (s, 1H), 5.06 (s, 1H), 3.59 (s, 2H), 1.35 (s, 18H); <sup>13</sup>C NMR (100 MHz, CDCl<sub>3</sub>, 25 °C, TMS): δ = 164.8 (s), 152.2 (s), 149.3 (s), 144.6 (s), 136.2 (s), 135.4 (s), 133.7 (s), 133.5 (s), 130.1 (s), 126.0 (s), 123.5 (s), 121.0 (s), 115.2 (s), 58.6 (s), 34.4 (s), 30.3 (s). HRMS (ESI) *m/z*: calcd. for C<sub>26</sub>H<sub>33</sub>N<sub>2</sub>O [M+H]<sup>+</sup>: 389.2588, found: 389.2581.

#### 4-((4-Aminophenyl)(anthracen-9-yl)methyl)-2,6-di-*tert*-butylphenol (4aa)

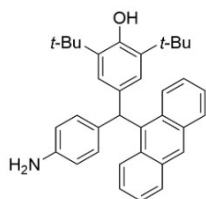

According to the general procedure, work-up and flash column chromatography (hexane/EtOAc: 5:1) gave product **4aa** (54.7 mg, 0.11 mmol, 56%) as a yellow oil. <sup>1</sup>H NMR (400 MHz, CDCl<sub>3</sub>, 25 °C, TMS): δ = 7.73-7.74 (m, 1H), 7.34-7.42 (m, 3H), 7.15-7.30 (m, 5H), 6.97-7.01 (m, 3H), 6.92 (s, 1H), 6.48-6.50 (m, 2H), 5.19 (s, 1H), 5.11 (s, 1H), 3.49 (s, 2H), 1.32 (s, 18H); <sup>13</sup>C NMR (100 MHz, CDCl<sub>3</sub>, 25 °C, TMS): δ = 153.1 (s), 144.5 (s), 141.2 (s), 139.3 (s), 139.1 (s), 135.4 (s), 134.7 (s), 134.2 (s), 128.9 (s), 128.5 (s), 128.4 (s), 127.9 (s), 127.3 (s), 126.6 (s), 126.4 (s), 125.2 (s), 123.7 (s), 115.2 (s), 51.6 (s), 34.3 (s), 30.2 (s). HRMS (ESI) *m/z*: calcd. for C<sub>28</sub>H<sub>36</sub>NO<sub>3</sub> [M+H]<sup>+</sup>: 488.2948, found: 488.2943.

#### 4-((4-Aminophenyl)(phenyl)methyl)-2,6-dimethylphenol (4ab)

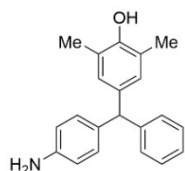

According to the general procedure, work-up and flash column chromatography (hexane/EtOAc: 5:1) gave product **4ab** (51.7 mg, 0.17 mmol, 85%) as a red oil. <sup>1</sup>H NMR (400 MHz, CDCl<sub>3</sub>, 25 °C, TMS): δ = 7.22-7.26 (m, 2H), 7.16-7.18 (m, 1H), 7.08-7.10 (m, 2H), 6.86-6.88 (m, 2H), 6.69 (s, 2H), 6.56-6.58 (m, 2H), 5.30 (s, 1H), 3.99 (s, 3H), 2.13 (s, 6H); <sup>13</sup>C NMR (100 MHz, CDCl<sub>3</sub>, 25 °C, TMS): δ = 150.6 (s), 145.1 (s), 144.4 (s), 136.1 (s), 134.9 (s), 130.3 (s), 129.5 (s), 129.4 (s), 128.3 (s), 126.1 (s), 122.9 (s), 115.3 (s), 55.4 (s), 16.2 (s). HRMS (ESI) *m/z*: calcd. for C<sub>21</sub>H<sub>22</sub>NO [M+H]<sup>+</sup>: 304.1696, found: 304.1692.

#### 4-((4-Aminophenyl)(phenyl)methyl)-2,6-diisopropylphenol (4ac)

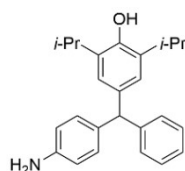

According to the general procedure, work-up and flash column chromatography (hexane/EtOAc: 2:1) gave product **4ac** (59.8 mg, 0.17 mmol, 83%) as a yellow oil. <sup>1</sup>H NMR (400 MHz, CDCl<sub>3</sub>, 25 °C, TMS): δ = 7.22-7.26 (m, 2H), 7.14-7.18 (m, 1H), 7.09-7.11 (m, 2H), 6.87-6.89 (m, 2H), 6.78 (s, 2H), 6.57-6.61 (m, 2H), 5.36 (s, 1H), 3.92 (s, 3H), 3.03-3.14 (m, 2H), 1.16 (d, *J* = 6.9, 12H); <sup>13</sup>C NMR (100 MHz, CDCl<sub>3</sub>, 25 °C, TMS): δ = 148.3 (s), 145.3 (s), 144.3 (s), 136.1 (s), 135.1 (s), 133.3 (s), 130.2 (s), 129.4 (s), 128.1 (s), 125.9 (s), 124.6 (s), 115.2 (s), 55.9 (s), 22.8 (s), 22.7 (s). HRMS (ESI) *m/z*: calcd. for C<sub>25</sub>H<sub>30</sub>NO [M+H]<sup>+</sup>: 360.2322, found: 360.2316.

#### 5'-((4-Aminophenyl)(phenyl)methyl)-[1,1':3',1''-terphenyl]-2'-ol (4ad)

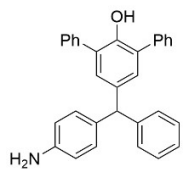

According to the general procedure, work-up and flash column chromatography (hexane/EtOAc: 5:1) gave product **4ad** (52.2 mg, 0.12 mmol, 61%) as a yellow oil. <sup>1</sup>H NMR (400 MHz, CDCl<sub>3</sub>, 25 °C, TMS): δ = 7.49-7.50 (m, 4H), 7.35-7.42 (m, 5H), 7.28-7.34 (m, 3H), 7.15-7.20 (m, 3H), 7.04 (s, 2H), 6.92-6.97 (m, 2H), 6.57-6.59 (m, 2H), 5.43 (s, 1H), 5.36 (s, 1H), 3.53 (s, 2H); <sup>13</sup>C NMR (100 MHz, CDCl<sub>3</sub>, 25 °C, TMS): δ = 147.7 (s), 144.7 (s), 144.6 (s), 137.8 (s), 136.8 (s), 134.3 (s), 130.9 (s), 130.2 (s), 129.4 (s), 129.3 (s), 128.8 (s), 128.5 (s), 128.3 (s), 127.6 (s), 126.2 (s), 115.2 (s), 55.5 (s). HRMS (ESI) *m/z*: calcd. for C<sub>31</sub>H<sub>26</sub>NO [M+H]<sup>+</sup>: 428.2009, found: 428.2001.

#### 4,4'-(1,4-Phenylenebis((4-Aminophenyl)methylene))bis(2,6-di-*tert*-butylphenol) (4ae)

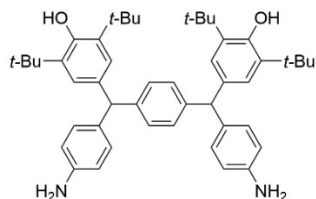

According to the general procedure, work-up and flash column chromatography (hexane/EtOAc: 2:1) gave product **4ae** (91.9 mg, 0.13 mmol, 66%) as a yellow oil.  $^1\text{H}$  NMR (400 MHz,  $\text{CDCl}_3$ , 25  $^\circ\text{C}$ , TMS):  $\delta$  = 6.99 (s, 4H), 6.86-6.88 (m, 8H), 6.57-6.59 (m, 4H), 5.29 (s, 2H), 5.03 (s, 2H), 3.56 (s, 4H);  $^{13}\text{C}$  NMR (100 MHz,  $\text{CDCl}_3$ , 25  $^\circ\text{C}$ , TMS):  $\delta$  = 151.9 (s), 144.2 (s), 142.8 (s), 142.7 (s), 135.4 (s), 135.2 (s), 135.1 (s), 135.0 (s), 130.2 (s), 129.0 (s), 126.0 (s), 115.0 (s), 55.7 (s), 34.3 (s), 30.4 (s). HRMS (ESI)  $m/z$ : calcd. for  $\text{C}_{48}\text{H}_{61}\text{N}_2\text{O}_2$   $[\text{M}+\text{H}]^+$ : 697.4728, found: 697.4722.

#### 2,6-Di-*tert*-butyl-4-((4-hydroxyphenyl)(phenyl)methyl)phenol (6a)

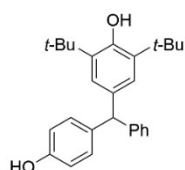

According to the general procedure, work-up and flash column chromatography (hexane/EtOAc: 10:1) gave product **6a** (69.2 mg, 0.18 mmol, 89%) as a yellow oil.  $^1\text{H}$  NMR (400 MHz,  $\text{CDCl}_3$ , 25  $^\circ\text{C}$ , TMS):  $\delta$  = 7.23-7.27 (m, 2H), 7.15-7.19 (m, 1H), 7.09-7.11 (m, 2H), 6.95-6.98 (m, 2H), 6.89 (s, 2H), 6.70-6.74 (m, 2H), 5.38 (s, 1H), 5.07 (s, 1H), 5.00 (s, 1H), 1.35 (s, 18H);  $^{13}\text{C}$  NMR (100 MHz,  $\text{CDCl}_3$ , 25  $^\circ\text{C}$ , TMS):  $\delta$  = 153.7 (s), 152.1 (s), 145.1 (s), 137.2 (s), 135.5 (s), 134.5 (s), 130.6 (s), 129.4 (s), 128.3 (s), 128.2 (s), 126.0 (s), 115.0 (s), 56.0 (s), 34.4 (s), 30.4 (s). HRMS (ESI)  $m/z$ : calcd. for  $\text{C}_{27}\text{H}_{33}\text{O}_2$   $[\text{M}+\text{H}]^+$ : 389.2476, found: 389.2471.

#### 2,6-Di-*tert*-butyl-4-((4-hydroxy-2-methylphenyl)(phenyl)methyl)phenol (6b)

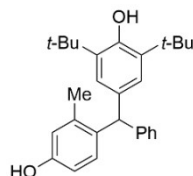

According to the general procedure, work-up and flash column chromatography (hexane/EtOAc: 10:1) gave product **6b** (72.5 mg, 0.18 mmol, 90%) as a yellow oil.  $^1\text{H}$  NMR (400 MHz,  $\text{CDCl}_3$ , 25  $^\circ\text{C}$ , TMS):  $\delta$  = 7.23-7.27 (m, 2H), 7.15-7.19 (m, 1H), 7.03-7.05 (m, 2H), 6.81 (s, 2H), 6.63-6.67 (m, 2H), 6.54-6.57 (m, 1H), 5.47 (s, 1H), 5.05 (s, 1H), 4.54 (s, 1H), 2.16 (s, 3H), 1.34 (s, 18H);  $^{13}\text{C}$  NMR (100 MHz,  $\text{CDCl}_3$ , 25  $^\circ\text{C}$ , TMS):  $\delta$  = 153.5 (s), 152.0 (s), 144.5 (s), 138.2 (s), 135.8 (s), 135.4 (s), 134.0 (s), 130.5 (s), 129.4 (s), 128.1 (s), 126.2 (s), 125.9 (s), 117.1 (s), 112.2 (s), 52.8 (s), 34.3 (s), 30.4 (s), 20.1 (s). HRMS (ESI)  $m/z$ : calcd. for  $\text{C}_{28}\text{H}_{35}\text{O}_2$   $[\text{M}+\text{H}]^+$ : 403.2632, found: 403.2625.

#### 2,6-Di-*tert*-butyl-4-((4-hydroxy-2-methoxyphenyl)(phenyl)methyl)phenol (6c)

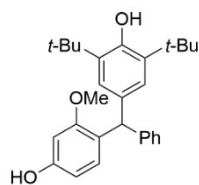

According to the general procedure, work-up and flash column chromatography (hexane/EtOAc: 5:1) gave product **6c** (74.6 mg, 0.18 mmol, 89%) as a yellow oil.  $^1\text{H}$  NMR (400 MHz,  $\text{CDCl}_3$ , 25  $^\circ\text{C}$ , TMS):  $\delta$  = 7.21-7.32 (m, 4H), 7.13-7.15 (m, 2H), 6.92 (s, 2H), 6.66-6.68 (m, 1H), 6.40-6.42 (m, 2H), 5.47 (s, 1H), 5.13 (s, 1H), 4.78 (s, 1H), 3.76 (s, 3H), 1.36 (s, 18H);  $^{13}\text{C}$  NMR (100 MHz,  $\text{CDCl}_3$ , 25  $^\circ\text{C}$ , TMS):  $\delta$  = 159.5 (s), 154.6 (s), 152.5 (s), 143.2 (s), 135.9 (s), 132.5 (s), 130.9 (s), 129.2 (s), 128.5 (s), 126.5 (s), 125.9 (s), 123.3 (s), 106.0 (s), 102.3 (s), 55.3 (s), 50.9 (s), 34.4 (s), 30.3 (s). HRMS (ESI)  $m/z$ : calcd. for  $\text{C}_{28}\text{H}_{35}\text{O}_3$   $[\text{M}+\text{H}]^+$ : 419.2581, found: 419.2574.

#### 2,6-Di-*tert*-butyl-4-((4-hydroxy-3-methylphenyl)(phenyl)methyl)phenol (**6d**)

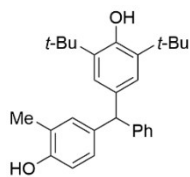

According to the general procedure, work-up and flash column chromatography (hexane/EtOAc: 10:1) gave product **6d** (70.2 mg, 0.17 mmol, 87%) as a yellow oil. <sup>1</sup>H NMR (400 MHz, CDCl<sub>3</sub>, 25 °C, TMS): δ = 7.23-7.27 (m, 2H), 7.15-7.18 (m, 1H), 7.07-7.11 (m, 2H), 6.90 (s, 3H), 6.76-6.78 (m, 1H), 6.64-6.66 (m, 1H), 5.34 (s, 1H), 5.06 (s, 1H), 4.76 (s, 1H), 2.17 (s, 1H), 1.36 (s, 18H); <sup>13</sup>C NMR (100 MHz, CDCl<sub>3</sub>, 25 °C, TMS): δ = 152.71 (s), 152.0 (s), 145.3 (s), 137.1 (s), 135.4 (s), 134.5 (s), 132.1 (s), 129.3 (s), 128.1 (s), 127.9 (s), 126.0 (s), 125.9 (s), 123.3 (s), 114.6 (s), 56.0 (s), 34.4 (s), 30.4 (s), 15.9 (s). HRMS (ESI) *m/z*: calcd. for C<sub>28</sub>H<sub>35</sub>O<sub>2</sub> [M+H]<sup>+</sup>: 403.2632, found: 403.2627.

#### 2,6-Di-*tert*-butyl-4-((3-ethyl-4-hydroxyphenyl)(phenyl)methyl)phenol (**6e**)

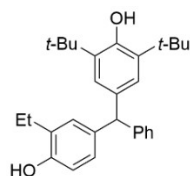

According to the general procedure, work-up and flash column chromatography (hexane/EtOAc: 10:1) gave product **6e** (71.2 mg, 0.17 mmol, 86%) as a yellow oil. <sup>1</sup>H NMR (400 MHz, CDCl<sub>3</sub>, 25 °C, TMS): δ = 7.22-7.27 (m, 2H), 7.14-7.18 (m, 1H), 7.09-7.11 (m, 2H), 6.90 (s, 2H), 6.76-6.79 (m, 1H), 6.23-6.25 (m, 1H), 5.35 (s, 1H), 5.06 (s, 1H), 4.86 (s, 1H), 2.51-2.59 (m, 2H), 1.36 (s, 18H), 1.16 (t, *J* = 7.5, 3H); <sup>13</sup>C NMR (100 MHz, CDCl<sub>3</sub>, 25 °C, TMS): δ = 152.0 (s), 151.6 (s), 145.4 (s), 137.1 (s), 135.4 (s), 134.6 (s), 130.4 (s), 129.6 (s), 129.4 (s), 128.1 (s), 127.8 (s), 126.0 (s), 125.9 (s), 114.8 (s), 56.2 (s), 34.4 (s), 30.4 (s), 23.1 (s), 14.2 (s). HRMS (ESI) *m/z*: calcd. for C<sub>29</sub>H<sub>37</sub>O<sub>2</sub> [M+H]<sup>+</sup>: 417.2789, found: 417.2783.

#### 2,6-Di-*tert*-butyl-4-((4-hydroxy-3-methoxyphenyl)(phenyl)methyl)phenol (**6f**)

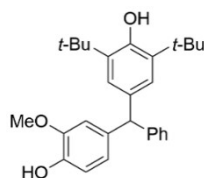

According to the general procedure, work-up and flash column chromatography (hexane/EtOAc: 5:1) gave product **6f** (73.7 mg, 0.18 mmol, 88%) as a yellow oil. <sup>1</sup>H NMR (400 MHz, CDCl<sub>3</sub>, 25 °C, TMS): δ = 7.24-7.28 (m, 2H), 7.16-7.20 (m, 1H), 7.10-7.11 (m, 2H), 6.91 (s, 2H), 6.81-6.83 (m, 1H), 6.64-6.65 (m, 1H), 6.56-6.59 (m, 1H), 5.50 (s, 1H), 5.36 (s, 1H), 5.08 (s, 1H), 3.77 (s, 3H), 1.36 (s, 18H); <sup>13</sup>C NMR (100 MHz, CDCl<sub>3</sub>, 25 °C, TMS): δ = 152.1 (s), 146.2 (s), 145.2 (s), 143.8 (s), 136.9 (s), 135.4 (s), 134.3 (s), 129.3 (s), 128.1 (s), 126.0 (s), 125.9 (s), 122.2 (s), 113.9 (s), 112.1 (s), 56.4 (s), 55.9 (s), 34.4 (s), 30.4 (s). HRMS (ESI) *m/z*: calcd. for C<sub>28</sub>H<sub>35</sub>O<sub>3</sub> [M+H]<sup>+</sup>: 419.2581, found: 419.2575.

#### 5-((3,5-Di-*tert*-butyl-4-hydroxyphenyl)(phenyl)methyl)-[1,1'-biphenyl]-2-ol (**6g**)

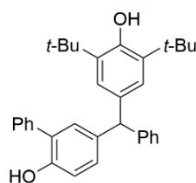

According to the general procedure, work-up and flash column chromatography (hexane/EtOAc: 5:1) gave product **6g** (76.3 mg, 0.16 mmol, 82%) as a yellow oil. <sup>1</sup>H NMR (400 MHz, CDCl<sub>3</sub>, 25 °C, TMS): δ = 7.40-7.49 (m, 4H), 7.34-7.37 (m, 1H), 7.25-7.28 (m, 2H), 7.13-7.19 (m, 3H), 6.97-7.03 (m, 2H), 6.93 (m, 2H), 6.87-6.89 (m, 1H), 5.40 (s, 1H), 5.09 (s, 1H), 5.06 (s, 1H), 1.36 (s, 18H); <sup>13</sup>C NMR (100 MHz, CDCl<sub>3</sub>, 25 °C, TMS): δ = 152.1 (s), 150.6 (s), 145.1 (s), 137.3 (s), 135.5 (s), 134.3 (s), 131.1 (s), 130.1 (s), 129.3 (s), 129.2 (s), 129.1 (s), 128.4 (s), 128.2 (s), 127.8 (s), 127.7 (s), 126.0 (s), 125.9 (s), 115.5 (s), 56.1 (s), 34.4 (s), 30.4 (s). HRMS (ESI) *m/z*: calcd. for C<sub>33</sub>H<sub>37</sub>O<sub>2</sub> [M+H]<sup>+</sup>: 465.2789, found: 465.2782.

### 2,6-Di-*tert*-butyl-4-((4-hydroxy-3-isopropylphenyl)(phenyl)methyl)phenol (6h)

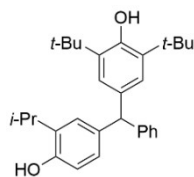

According to the general procedure, work-up and flash column chromatography (hexane/EtOAc: 10:1) gave product **6h** (75.9 mg, 0.18 mmol, 88%) as a yellow oil. <sup>1</sup>H NMR (400 MHz, CDCl<sub>3</sub>, 25 °C, TMS): δ = 7.24-7.27 (m, 2H), 7.15-7.19 (m, 1H), 7.09-7.11 (m, 2H), 6.95-6.96 (m, 1H), 6.90 (s, 2H), 6.75-6.78 (m, 1H), 6.62-6.64 (m, 1H), 5.36 (s, 1H), 5.06 (s, 1H), 4.71 (s, 1H), 3.10-3.21 (m, 1H), 1.35 (s, 18H), 1.17 (d, *J* = 6.9, 6H); <sup>13</sup>C NMR (100 MHz, CDCl<sub>3</sub>, 25 °C, TMS): δ = 152.0 (s), 150.9 (s), 145.5 (s), 137.1 (s), 135.3 (s), 134.6 (s), 133.9 (s), 129.3 (s), 128.1 (s), 127.6 (s), 127.5 (s), 126.0 (s), 125.9 (s), 114.9 (s), 56.2 (s), 34.4 (s), 30.4 (s), 27.1 (s), 22.6 (s). HRMS (ESI) *m/z*: calcd. for C<sub>30</sub>H<sub>39</sub>O<sub>2</sub> [M+H]<sup>+</sup>: 431.2945, found: 431.2940.

### 2,6-Di-*tert*-butyl-4-((3-(*tert*-butyl)-4-hydroxyphenyl)(phenyl)methyl)phenol (6i)

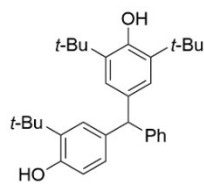

According to the general procedure, work-up and flash column chromatography (hexane/EtOAc: 5:1) gave product **6i** (77.4 mg, 0.17 mmol, 87%) as a yellow oil. <sup>1</sup>H NMR (400 MHz, CDCl<sub>3</sub>, 25 °C, TMS): δ = 7.23-7.27 (m, 2H), 7.15-7.18 (m, 1H), 7.10-7.11 (m, 2H), 7.02-7.03 (m, 1H), 6.91 (s, 2H), 6.76-6.79 (m, 1H), 6.54-6.56 (m, 1H), 5.34 (s, 1H), 5.06 (s, 1H), 4.74 (s, 1H), 1.36 (s, 18H), 1.33 (s, 9H); <sup>13</sup>C NMR (100 MHz, CDCl<sub>3</sub>, 25 °C, TMS): δ = 152.4 (s), 152.0 (s), 145.6 (s), 136.5 (s), 135.5 (s), 135.3 (s), 134.6 (s), 129.3 (s), 128.3 (s), 128.1 (s), 127.7 (s), 126.0 (s), 125.8 (s), 116.2 (s), 56.3 (s), 34.6 (s), 34.4 (s), 30.4 (s), 29.6 (s). HRMS (ESI) *m/z*: calcd. for C<sub>31</sub>H<sub>41</sub>O<sub>2</sub> [M+H]<sup>+</sup>: 445.3102, found: 445.3097.

### 2,6-Di-*tert*-butyl-4-((4-hydroxy-3,5-dimethylphenyl)(phenyl)methyl)phenol (6j)

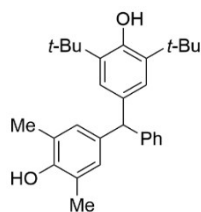

According to the general procedure, work-up and flash column chromatography (hexane/EtOAc: 5:1) gave product **6j** (68.4 mg, 0.16 mmol, 82%) as a yellow oil. <sup>1</sup>H NMR (400 MHz, CDCl<sub>3</sub>, 25 °C, TMS): δ = 7.23-7.29 (m, 2H), 7.14-7.18 (m, 1H), 7.09-7.11 (m, 2H), 6.89-6.91 (m, 2H), 6.73 (s, 2H), 5.30 (s, 1H), 5.05 (s, 1H), 4.48 (s, 1H), 2.17 (s, 6H), 1.36 (s, 18H); <sup>13</sup>C NMR (100 MHz, CDCl<sub>3</sub>, 25 °C, TMS): δ = 152.0 (s), 150.4 (s), 145.4 (s), 136.4 (s), 135.4 (s), 134.6 (s), 129.5 (s), 129.3 (s), 128.1 (s), 126.0 (s), 125.8 (s), 122.6 (s), 56.2 (s), 34.4 (s), 30.4 (s), 16.0 (s). HRMS (ESI) *m/z*: calcd. for C<sub>29</sub>H<sub>37</sub>O<sub>2</sub> [M+H]<sup>+</sup>: 417.2789, found: 417.2784.

### 2,6-Di-*tert*-butyl-4-((4-hydroxy-3,5-diisopropylphenyl)(phenyl)methyl)phenol (6k)

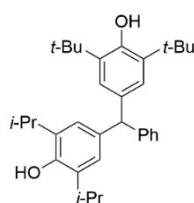

According to the general procedure, work-up and flash column chromatography (hexane/EtOAc: 5:1) gave product **6k** (74.7 mg, 0.16 mmol, 79%) as a yellow oil. <sup>1</sup>H NMR (400 MHz, CDCl<sub>3</sub>, 25 °C, TMS): δ = 7.23-7.26 (m, 2H), 7.10-7.17 (m, 3H), 6.92 (s, 2H), 6.80 (s, 2H), 5.34 (s, 1H), 5.05 (s, 1H), 4.65 (s, 1H), 3.05-3.16 (m, 2H), 1.36 (s, 18H), 1.17 (d, *J* = 6.9 Hz, 12H); <sup>13</sup>C NMR (100 MHz, CDCl<sub>3</sub>, 25 °C, TMS): δ = 151.9 (s), 148.1 (s), 136.4 (s), 135.3 (s), 134.8 (s), 133.1 (s), 129.3 (s), 128.0 (s), 126.0 (s), 125.8 (s), 124.6 (s), 56.6 (s), 34.4 (s), 30.4 (s), 27.3 (s), 22.8 (s). HRMS (ESI) *m/z*: calcd. for C<sub>33</sub>H<sub>45</sub>O<sub>2</sub> [M+H]<sup>+</sup>: 473.3415, found: 473.3410.



#### 2,6-Di-*tert*-butyl-4-((4-hydroxy-3,5-dimethoxyphenyl)(phenyl)methyl)phenol (**6l**)

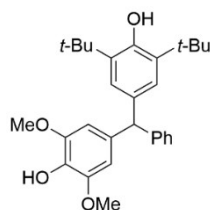

According to the general procedure, work-up and flash column chromatography (hexane/EtOAc: 5:1) gave product **6l** (46.7 mg, 0.41 mmol, 52%) as a yellow oil.  $^1\text{H}$  NMR (400 MHz,  $\text{CDCl}_3$ , 25  $^\circ\text{C}$ , TMS):  $\delta$  = 7.25-7.29 (m, 2H), 7.17-7.20 (m, 1H), 7.09-7.11 (m, 2H), 6.92 (s, 2H), 6.34 (s, 2H), 5.39 (s, 1H), 5.35 (s, 1H), 5.08 (s, 1H), 3.76 (s, 6H), 1.36 (s, 18H);  $^{13}\text{C}$  NMR (100 MHz,  $\text{CDCl}_3$ , 25  $^\circ\text{C}$ , TMS):  $\delta$  = 152.1 (s), 146.8 (s), 145.1 (s), 135.9 (s), 135.5 (s), 134.1 (s), 132.9 (s), 129.3 (s), 128.1 (s), 126.0 (s), 125.9 (s), 106.4 (s), 56.8 (s), 56.2 (s), 34.4 (s), 30.4 (s). HRMS (ESI)  $m/z$ : calcd. for  $\text{C}_{29}\text{H}_{37}\text{O}_4$   $[\text{M}+\text{H}]^+$ : 449.2687, found: 449.2681.

#### 4-((3,5-Di-*tert*-butyl-4-hydroxyphenyl)(phenyl)methyl)-5-isopropyl-2-methylphenol (**6m**)

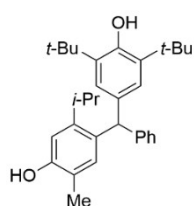

According to the general procedure, work-up and flash column chromatography (hexane/EtOAc: 5:1) gave product **6m** (73.9 mg, 0.17 mmol, 83%) as a yellow oil.  $^1\text{H}$  NMR (400 MHz,  $\text{CDCl}_3$ , 25  $^\circ\text{C}$ , TMS):  $\delta$  = 7.22-7.26 (m, 2H), 7.14-7.18 (m, 1H), 7.06-7.07 (m, 2H), 6.82 (s, 2H), 6.79 (s, 1H), 6.55 (s, 1H), 5.62 (s, 1H), 5.03 (s, 1H), 4.58 (s, 1H), 3.09-3.19 (m, 1H), 2.10 (s, 3H), 1.34 (s, 18H), 1.03 (dd,  $J$  = 8.7, 6.8 Hz, 6H);  $^{13}\text{C}$  NMR (100 MHz,  $\text{CDCl}_3$ , 25  $^\circ\text{C}$ , TMS):  $\delta$  = 152.2 (s), 151.9 (s), 146.3 (s), 145.3 (s), 135.3 (s), 134.7 (s), 133.8 (s), 132.3 (s), 129.6 (s), 128.0 (s), 126.2 (s), 125.8 (s), 120.1 (s), 112.1 (s), 51.8 (s), 34.3 (s), 30.4 (s), 28.4 (s), 24.0 (s), 15.5 (s). HRMS (ESI)  $m/z$ : calcd. for  $\text{C}_{31}\text{H}_{41}\text{O}_2$   $[\text{M}+\text{H}]^+$ : 445.3102, found: 445.3098.

#### 2,6-Di-*tert*-butyl-4-((3-fluoro-4-hydroxyphenyl)(phenyl)methyl)phenol (**6n**)

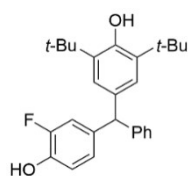

According to the general procedure, work-up and flash column chromatography (hexane/EtOAc: 5:1) gave product **6n** (70.0 mg, 0.17 mmol, 86%) as a yellow oil.  $^1\text{H}$  NMR (400 MHz,  $\text{CDCl}_3$ , 25  $^\circ\text{C}$ , TMS):  $\delta$  = 7.26-7.29 (m, 2H), 7.18-7.21 (m, 1H), 7.08-7.10 (m, 2H), 6.87-6.92 (m, 3H), 6.76-6.83 (m, 2H), 5.36 (s, 1H), 5.18 (s, 1H), 5.09 (s, 1H), 1.36 (s, 18H);  $^{13}\text{C}$  NMR (100 MHz,  $\text{CDCl}_3$ , 25  $^\circ\text{C}$ , TMS):  $\delta$  = 152.2 (s), 150.8 (d,  $J(\text{C},\text{F})$  = 235.6 Hz), 144.4 (s), 141.6 (d,  $J(\text{C},\text{F})$  = 8.1 Hz), 138.1 (d,  $J(\text{C},\text{F})$  = 5.1 Hz), 135.6 (s), 133.8 (s), 129.3 (s), 128.2 (s), 126.2 (s), 125.9 (s), 125.6 (d,  $J(\text{C},\text{F})$  = 3.3 Hz), 116.7 (d,  $J(\text{C},\text{F})$  = 2.0 Hz), 116.4 (d,  $J(\text{C},\text{F})$  = 18.5 Hz), 55.9 (s), 34.4 (s), 30.3 (s);  $^{19}\text{F}$  NMR (376 MHz,  $\text{CDCl}_3$ , 25  $^\circ\text{C}$ , TMS):  $\delta$  = -141.0 (s). HRMS (ESI)  $m/z$ : calcd. for  $\text{C}_{27}\text{H}_{32}\text{FO}_2$   $[\text{M}+\text{H}]^+$ : 407.2381, found: 407.2373.

#### 4-((2-Bromo-4-hydroxyphenyl)(phenyl)methyl)-2,6-di-*tert*-butylphenol (**6o**)

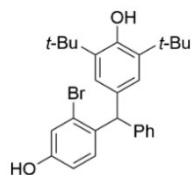

According to the general procedure, work-up and flash column chromatography (hexane/EtOAc: 5:1) gave product **6o** (82.2 mg, 0.18 mmol, 88%) as a yellow oil.  $^1\text{H}$  NMR (400 MHz,  $\text{CDCl}_3$ , 25  $^\circ\text{C}$ , TMS):  $\delta$  = 7.25-7.28 (m, 2H), 7.17-7.21 (m, 1H), 7.05-7.10 (m, 3H), 6.80-6.83 (m, 3H), 6.68-6.71 (m, 1H), 5.75 (s, 1H), 5.08 (s, 1H), 4.87 (s, 1H), 1.35 (s, 18H);  $^{13}\text{C}$  NMR (100 MHz,  $\text{CDCl}_3$ , 25  $^\circ\text{C}$ , TMS):  $\delta$  = 154.3 (s), 152.14 (s), 136.5 (s), 135.5 (s), 133.3 (s), 131.8 (s), 130.8 (s), 129.5 (s), 128.1 (s), 126.2 (s), 126.1 (s), 125.5 (s), 124.0 (s), 119.7 (s), 118.8 (s), 114.4 (s), 114.2 (s), 55.0 (s), 34.3 (s), 30.3 (s). HRMS (ESI)  $m/z$ : calcd. for  $\text{C}_{27}\text{H}_{32}\text{BrO}_2$   $[\text{M}+\text{H}]^+$ : 467.1581, found: 467.1576.

### 2,6-Di-*tert*-butyl-4-((4-hydroxy-2-iodophenyl)(phenyl)methyl)phenol (**6p**)

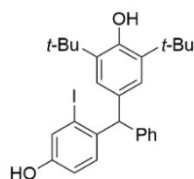

According to the general procedure, work-up and flash column chromatography (hexane/EtOAc: 5:1) gave product **6p** (89.6 mg, 0.17 mmol, 87%) as a yellow oil. <sup>1</sup>H NMR (400 MHz, CDCl<sub>3</sub>, 25 °C, TMS): δ = 7.36-7.37 (m, 1H), 7.18-7.28 (m, 3H), 7.05-7.07 (m, 2H), 6.73-6.83 (m, 4H), 5.63 (s, 1H), 5.08 (s, 1H), 4.73 (s, 1H), 1.35 (s, 18H); <sup>13</sup>C NMR (100 MHz, CDCl<sub>3</sub>, 25 °C, TMS): δ = 154.1 (s), 152.1 (s), 143.6 (s), 139.7 (s), 135.5 (s), 133.5 (s), 130.9 (s), 129.6 (s), 128.1 (s), 126.3 (s), 126.1 (s), 115.2 (s), 114.9 (s), 102.2 (s), 59.6 (s), 34.3 (s), 30.3 (s). HRMS (ESI) *m/z*: calcd. for C<sub>27</sub>H<sub>32</sub>IO<sub>2</sub> [M+H]<sup>+</sup>: 515.1442, found: 515.1437.

### 3-Bromo-4-((3,5-di-*tert*-butyl-4-hydroxyphenyl)(phenyl)methyl)-2-fluorophenol (**6q**)

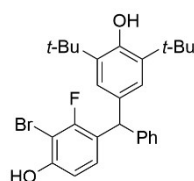

According to the general procedure, work-up and flash column chromatography (hexane/EtOAc: 5:1) gave product **6q** (72.8 mg, 0.15 mmol, 75%) as a yellow oil. <sup>1</sup>H NMR (400 MHz, CDCl<sub>3</sub>, 25 °C, TMS): δ = 7.24-7.29 (m, 2H), 7.16-7.22 (m, 1H), 7.07-7.09 (m, 2H), 6.87 (s, 2H), 6.79-6.83 (m, 1H), 6.71-6.76 (m, 1H), 5.66 (s, 1H), 5.53 (s, 1H), 5.11 (s, 1H), 1.36 (s, 18H); <sup>13</sup>C NMR (100 MHz, CDCl<sub>3</sub>, 25 °C, TMS): δ = 156.8 (d, *J*(C,F) = 246.0 Hz), 152.3 (s), 152.0 (s), 143.1 (s), 135.6 (s), 132.4 (s), 130.0 (d, *J*(C,F) = 5.5 Hz), 129.1 (s), 128.3 (s), 126.4 (s), 125.9 (s), 125.1 (d, *J*(C,F) = 15.6 Hz), 110.7 (d, *J*(C,F) = 3.4 Hz), 98.3 (d, *J*(C,F) = 24.1 Hz), 49.0 (s), 34.4 (s), 30.3 (s); <sup>19</sup>F NMR (376 MHz, CDCl<sub>3</sub>, 25 °C, TMS): δ = -108.1 (s). HRMS (ESI) *m/z*: calcd. for C<sub>27</sub>H<sub>31</sub>BrFO<sub>2</sub> [M+H]<sup>+</sup>: 485.1486, found: 485.1480.

### 2,5-Dibromo-4-((3,5-di-*tert*-butyl-4-hydroxyphenyl)(phenyl)methyl)phenol (**6r**)

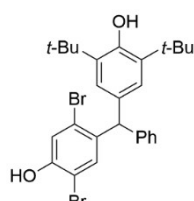

According to the general procedure, work-up and flash column chromatography (hexane/EtOAc: 5:1) gave product **6r** (86.4 mg, 0.16 mmol, 79%) as a yellow oil. <sup>1</sup>H NMR (400 MHz, CDCl<sub>3</sub>, 25 °C, TMS): δ = 7.17-7.31 (m, 4H), 7.03-7.07 (m, 3H), 6.82 (s, 2H), 5.71 (s, 1H), 5.44 (s, 1H), 5.12 (s, 1H), 1.36 (s, 18H); <sup>13</sup>C NMR (100 MHz, CDCl<sub>3</sub>, 25 °C, TMS): δ = 152.4 (s), 151.1 (s), 142.9 (s), 138.0 (s), 135.6 (s), 133.5 (s), 132.6 (s), 129.4 (s), 128.3 (s), 126.4 (s), 126.1 (s), 125.0 (s), 120.2 (s), 109.1 (s), 55.1 (s), 34.4 (s), 30.3 (s). HRMS (ESI) *m/z*: calcd. for C<sub>27</sub>H<sub>31</sub>Br<sub>2</sub>O<sub>2</sub> [M+H]<sup>+</sup>: 547.0665, found: 547.0661.

### 4-((3,5-Di-*tert*-butyl-4-hydroxyphenyl)(phenyl)methyl)-2-fluoro-5-methylphenol (**6s**)

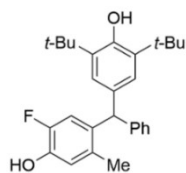

According to the general procedure, work-up and flash column chromatography (hexane/EtOAc: 5:1) gave product **6s** (69.2 mg, 0.16 mmol, 82%) as a yellow solid. mp: 137.8-138.2 °C. <sup>1</sup>H NMR (400 MHz, CDCl<sub>3</sub>, 25 °C, TMS): δ = 7.23-7.27 (m, 2H), 7.16-7.20 (m, 1H), 7.03-7.04 (m, 2H), 6.77-6.80 (m, 3H), 6.51-6.54 (m, 1H), 5.44 (s, 1H), 5.08 (s, 1H), 5.01 (s, 1H), 2.11 (s, 3H), 1.35 (s, 18H); <sup>13</sup>C NMR (100 MHz, CDCl<sub>3</sub>, 25 °C, TMS): δ = 152.2 (s), 149.1 (d, *J*(C,F) = 232.5 Hz), 143.8 (s), 141.1 (d, *J*(C,F) = 14.4 Hz), 136.3 (d, *J*(C,F) = 4.8 Hz), 135.6 (s), 133.5 (s), 133.1 (d, *J*(C,F) = 3.5 Hz), 129.4 (s), 128.2 (s), 126.2 (s), 126.1 (s), 118.8 (d, *J*(C,F) = 1.5 Hz), 116.5 (d, *J*(C,F) = 19.0 Hz), 52.9 (s), 34.4 (s), 30.4 (s), 19.4 (s); <sup>19</sup>F NMR (376 MHz, CDCl<sub>3</sub>, 25 °C, TMS): δ = -144.8 (s). HRMS (ESI) *m/z*: calcd. for C<sub>28</sub>H<sub>34</sub>FO<sub>2</sub> [M+H]<sup>+</sup>: 421.2538, found: 421.2531.

#### 5-Bromo-4-((3,5-di-*tert*-butyl-4-hydroxyphenyl)(phenyl)methyl)-2-methoxyphenol (**6t**)

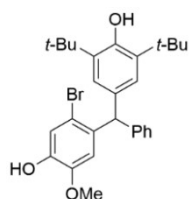

According to the general procedure, work-up and flash column chromatography (hexane/EtOAc: 5:1) gave product **6t** (82.5 mg, 0.17 mmol, 83%) as a yellow oil. <sup>1</sup>H NMR (400 MHz, CDCl<sub>3</sub>, 25 °C, TMS): δ = 7.25-7.28 (m, 2H), 7.17-7.21 (m, 1H), 7.13 (s, 1H), 7.06-7.08 (m, 2H), 6.89 (s, 2H), 6.45 (s, 1H), 5.74 (s, 1H), 5.51 (s, 1H), 5.10 (s, 1H), 3.64 (s, 3H), 1.36 (s, 18H); <sup>13</sup>C NMR (100 MHz, CDCl<sub>3</sub>, 25 °C, TMS): δ = 152.2 (s), 145.7 (s), 144.5 (s), 143.7 (s), 135.6 (s), 133.5 (s), 133.3 (s), 129.3 (s), 128.2 (s), 126.2 (s), 126.1 (s), 118.6 (s), 115.9 (s), 113.3 (s), 55.9 (s), 55.4 (s), 34.4 (s), 30.4 (s). HRMS (ESI) *m/z*: calcd. for C<sub>28</sub>H<sub>34</sub>BrO<sub>3</sub> [M+H]<sup>+</sup>: 497.1686, found: 497.1681.

#### 2-((3,5-Di-*tert*-butyl-4-hydroxyphenyl)(phenyl)methyl)naphthalen-1-ol (**6u**)

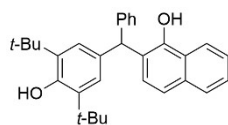

According to the general procedure, work-up and flash column chromatography (hexane/EtOAc: 10:1) gave product **6u** (44.8 mg, 0.10 mmol, 51%) as a colorless oil. <sup>1</sup>H NMR (400 MHz, CDCl<sub>3</sub>, 25 °C, TMS): δ = 8.20-8.22 (m, 1H), 7.97-7.99 (m, 1H), 7.38-7.45 (m, 2H), 7.22-7.25 (m, 2H), 7.10-7.18 (m, 3H), 6.88 (m, 2H), 6.74-6.76 (m, 1H), 6.68-6.70 (m, 1H), 6.08 (s, 1H), 5.26 (s, 1H), 5.06 (s, 1H), 1.33 (s, 18H); <sup>13</sup>C NMR (100 MHz, CDCl<sub>3</sub>, 25 °C, TMS): δ = 152.1 (s), 150.2 (s), 144.8 (s), 135.5 (s), 134.3 (s), 133.5 (s), 133.1 (s), 129.5 (s), 128.2 (s), 127.4 (s), 126.5 (s), 126.4 (s), 126.0 (s), 124.8 (s), 124.7 (s), 124.5 (s), 122.1 (s), 107.9 (s), 52.7 (s), 34.4 (s), 30.4 (s). HRMS (ESI) *m/z*: calcd. for C<sub>31</sub>H<sub>35</sub>O<sub>2</sub> [M+H]<sup>+</sup>: 439.2632, found: 439.2628.

#### 1-((3,5-Di-*tert*-butyl-4-hydroxyphenyl)(phenyl)methyl)naphthalen-2-ol (**6v**)

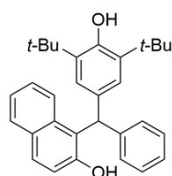

According to the general procedure, work-up and flash column chromatography (hexane/EtOAc: 10:1) gave product **6v** (56.2 mg, 0.13 mmol, 64%) as a colorless oil. <sup>1</sup>H NMR (400 MHz, CDCl<sub>3</sub>, 25 °C, TMS): δ = 8.01-8.04 (m, 1H), 7.77-7.79 (m, 1H), 7.71-7.73 (m, 1H), 7.40-7.44 (m, 1H), 7.29-7.33 (m, 3H), 7.22-7.27 (m, 3H), 7.06-7.08 (m, 1H), 7.01 (s, 2H), 6.29 (s, 1H), 5.40 (s, 1H), 5.20 (s, 1H), 1.32 (s, 18H); <sup>13</sup>C NMR (100 MHz, CDCl<sub>3</sub>, 25 °C, TMS): δ = 153.2 (s), 153.1 (s), 142.1 (s), 136.8 (s), 133.5 (s), 131.8 (s), 129.6 (s), 129.5 (s), 129.0 (s), 128.9 (s), 128.7 (s), 126.9 (s), 126.7 (s), 125.7 (s), 123.1 (s), 122.9 (s), 120.3 (s), 120.0 (s), 48.6 (s), 34.5 (s), 30.2 (s). HRMS (ESI) *m/z*: calcd. for C<sub>31</sub>H<sub>35</sub>O<sub>2</sub> [M+H]<sup>+</sup>: 439.2632, found: 439.2625.

#### (8*R*,9*S*,13*S*,14*S*,17*R*)-2-((3,5-Di-*tert*-butyl-4-hydroxyphenyl)(phenyl)methyl)-17-ethynyl-13-methyl-7,8,9,11,12,13,14,15,16,17-decahydro-6*H*-cyclopenta[*a*]phenanthrene-3,17-diol (**6w**)

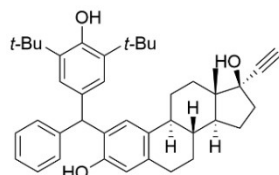

According to the general procedure, work-up and flash column chromatography (hexane/EtOAc: 2:1) gave product **6w** (77.9 mg, 0.13 mmol, 66%) as a yellow oil. <sup>1</sup>H NMR (400 MHz, CDCl<sub>3</sub>, 25 °C, TMS): δ = 7.28-7.31 (m, 2H), 7.15-7.24 (m, 3H), 6.93-6.97 (m, 2H), 6.74-6.75 (m, 1H), 6.53 (s, 1H), 5.46-5.53 (s, 1H), 5.10-5.11 (s, 1H), 4.52-4.54 (s, 1H), 2.76-2.82 (m, 2H), 2.56-2.57 (m, 1H), 2.28-2.35 (m, 1H), 2.10-2.19 (m, 1H), 1.97-2.04 (m, 2H), 1.73-1.90 (m, 3H), 1.60-1.70 (m, 2H), 1.43 (s, 1H), 1.36-1.37 (s, 18H), 0.85-0.90 (m, 5H); <sup>13</sup>C NMR (100 MHz, CDCl<sub>3</sub>, 25 °C, TMS): δ = 152.5 (s), 152.4 (s), 151.5 (s), 151.4 (s), 143.4 (s), 143.3 (s), 136.3 (s), 136.2 (s), 135.9 (s), 135.8 (s), 132.7 (s), 132.6 (s), 132.2 (s), 132.1 (s), 129.2 (s), 129.1 (s),

128.5 (s), 128.1 (s), 127.8 (s), 127.7 (s), 127.5 (s), 126.5 (s), 126.0 (s), 116.2 (s), 116.1 (s), 87.6 (s), 77.9 (s), 74.0 (s), 51.8 (s), 51.3 (s), 49.5 (s), 47.2 (s), 47.1 (s), 43.6 (s), 43.5 (s), 39.4 (s), 39.0 (s), 34.4 (s), 32.7 (s), 30.3 (s), 30.2 (s), 29.2 (s), 27.3 (s), 27.2 (s), 26.9 (s), 26.4 (s), 26.3 (s), 22.8 (s), 12.8 (s), 12.7 (s). HRMS (ESI)  $m/z$ : calcd. for  $C_{41}H_{51}O_3$   $[M+H]^+$ : 591.3833, found: 591.3828.

**(8*R*,9*S*,13*S*,14*S*)-2-((3,5-Di-*tert*-butyl-4-hydroxyphenyl)(phenyl)methyl)-3-hydroxy-13-methyl-6,7,8,9,11,12,13,14,15,16-decahydro-17*H*-cyclopenta[*a*]phenanthren-17-one (6x)**

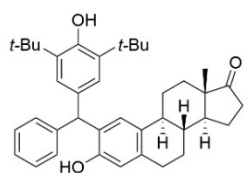

According to the general procedure, work-up and flash column chromatography (hexane/EtOAc: 2:1) gave product **6x** (99.4 mg, 0.18 mmol, 88%) as a yellow oil.  $^1H$  NMR (400 MHz,  $CDCl_3$ , 25 °C, TMS):  $\delta$  = 7.14-7.31 (m, 5H), 6.93-6.97 (m, 2H), 6.75-6.76 (m, 1H), 6.54 (s, 1H), 5.48-5.54 (s, 1H), 5.11-5.12 (s, 1H), 4.76-4.80 (s, 1H), 2.82-2.86 (m, 2H), 2.44-2.51 (m, 1H), 1.95-2.18 (m, 4H), 1.82-1.86 (m, 1H), 1.52-1.63 (m, 2H), 1.35-1.36 (s, 18H), 0.78-0.97 (m, 6H);  $^{13}C$  NMR (100 MHz,  $CDCl_3$ , 25 °C, TMS):  $\delta$  = 152.5 (s), 152.4 (s), 151.7 (s), 151.6 (s), 143.4 (s), 143.3 (s), 136.0 (s), 135.9 (s), 135.8 (s), 135.7 (s), 132.7 (s), 132.5 (s), 131.7 (s), 131.5 (s), 129.2 (s), 129.0 (s), 128.5 (s), 128.3 (s), 128.0 (s), 127.6 (s), 127.5 (s), 126.5 (s), 126.0 (s), 125.9 (s), 116.3 (s), 116.2 (s), 51.7 (s), 51.2 (s), 50.4 (s), 48.1 (s), 48.0 (s), 44.1 (s), 44.0 (s), 38.4 (s), 38.3 (s), 35.9 (s), 34.4 (s), 31.5 (s), 30.4 (s), 30.3 (s), 29.1 (s), 29.0 (s), 27.0 (s), 26.6 (s), 26.5 (s), 25.9 (s), 25.8 (s), 21.6 (s), 13.9 (s), 13.8 (s). HRMS (ESI)  $m/z$ : calcd. for  $C_{39}H_{49}O_3$   $[M+H]^+$ : 565.3677, found: 565.3671.

**2,6-Di-*tert*-butyl-4-((2-hydroxy-4-isopropylphenyl)(phenyl)methyl)phenol (6ae)**

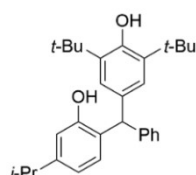

According to the general procedure, work-up and flash column chromatography (hexane/EtOAc: 10:1) gave product **6ae** (69.8 mg, 0.16 mmol, 81%) as a yellow oil.  $^1H$  NMR (400 MHz,  $CDCl_3$ , 25 °C, TMS):  $\delta$  = 7.28-7.31 (m, 2H), 7.19-7.25 (m, 1H), 7.13-7.17 (m, 2H), 6.93 (m, 2H), 6.67-6.73 (m, 3H), 5.50 (s, 1H), 5.12 (s, 1H), 4.63 (s, 1H), 2.78-2.88 (m, 3H), 1.35 (s, 18H), 1.22 (d,  $J$  = 6.9, 6H);  $^{13}C$  NMR (100 MHz,  $CDCl_3$ , 25 °C, TMS):  $\delta$  = 153.4 (s), 152.5 (s), 149.0 (s), 143.2 (s), 135.9 (s), 132.4 (s), 130.1 (s), 129.3 (s), 128.5 (s), 128.1 (s), 126.6 (s), 126.0 (s), 118.7 (s), 114.3 (s), 51.2 (s), 34.4 (s), 33.6 (s), 30.4 (s), 24.0 (s). HRMS (ESI)  $m/z$ : calcd. for  $C_{30}H_{39}O_2$   $[M+H]^+$ : 431.2945, found: 431.2940.

**2,6-Di-*tert*-butyl-4-((4-hydroxyphenyl)(*p*-tolyl)methyl)phenol (7a)**

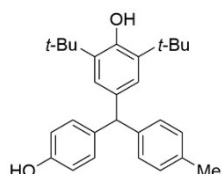

According to the general procedure, work-up and flash column chromatography (hexane/EtOAc: 10:1) gave product **7a** (73.3 mg, 0.18 mmol, 91%) as a yellow oil.  $^1H$  NMR (400 MHz,  $CDCl_3$ , 25 °C, TMS):  $\delta$  = 7.05-7.07 (m, 2H), 6.95-6.99 (m, 4H), 6.89 (s, 2H), 6.70-6.73 (m, 2H), 5.33 (s, 1H), 5.05 (s, 1H), 4.79 (s, 1H), 2.31 (s, 3H), 1.35 (s, 18H);  $^{13}C$  NMR (100 MHz,  $CDCl_3$ , 25 °C, TMS):  $\delta$  = 153.7 (s), 152.0 (s), 142.1 (s), 137.5 (s), 135.4 (s), 135.3 (s), 134.6 (s), 130.5 (s), 129.2 (s), 128.8 (s), 125.9 (s), 114.9 (s), 55.7 (s), 34.4 (s), 30.4 (s), 21.0 (s). HRMS (ESI)  $m/z$ : calcd. for  $C_{28}H_{35}O_2$   $[M+H]^+$ : 403.2632, found: 403.2625.

#### 2,6-Di-*tert*-butyl-4-((4-hydroxyphenyl)(*o*-tolyl)methyl)phenol (7b)

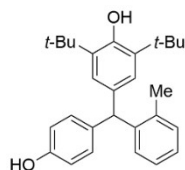

According to the general procedure, work-up and flash column chromatography (hexane/EtOAc: 10:1) gave product **7b** (71.7 mg, 0.18 mmol, 89%) as a yellow solid. mp: 156.5-156.7 °C. <sup>1</sup>H NMR (400 MHz, CDCl<sub>3</sub>, 25 °C, TMS): δ = 7.06-7.14 (m, 3H), 6.90-6.92 (m, 2H), 6.80-6.82 (m, 3H), 6.70-6.74 (m, 2H), 5.49 (s, 1H), 5.05 (s, 1H), 4.76 (s, 1H), 2.21 (s, 3H), 1.34 (s, 18H); <sup>13</sup>C NMR (100 MHz, CDCl<sub>3</sub>, 25 °C, TMS): δ = 153.6 (s), 152.0 (s), 143.5 (s), 136.5 (s), 136.4 (s), 135.4 (s), 134.0 (s), 130.6 (s), 130.2 (s), 129.2 (s), 126.2 (s), 126.0 (s), 125.6 (s), 115.0 (s), 52.6 (s), 34.3 (s), 30.4 (s), 20.0 (s). HRMS (ESI) *m/z*: calcd. for C<sub>28</sub>H<sub>35</sub>O<sub>2</sub> [M+H]<sup>+</sup>: 403.2632, found: 403.2627.

#### 2,6-Di-*tert*-butyl-4-((4-ethylphenyl)(4-hydroxyphenyl)methyl)phenol (7c)

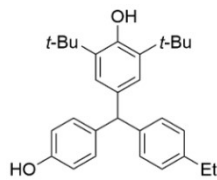

According to the general procedure, work-up and flash column chromatography (hexane/EtOAc: 10:1) gave product **7c** (73.4 mg, 0.18 mmol, 88%) as a yellow oil. <sup>1</sup>H NMR (400 MHz, CDCl<sub>3</sub>, 25 °C, TMS): δ = 7.08-7.10 (m, 2H), 6.92-7.02 (m, 4H), 6.90 (s, 2H), 6.71-6.73 (m, 2H), 5.33 (s, 1H), 5.05 (s, 1H), 4.86 (s, 1H), 2.58-2.64 (m, 2H), 1.35 (s, 18H), 1.20 (d, *J* = 7.6, 3H); <sup>13</sup>C NMR (100 MHz, CDCl<sub>3</sub>, 25 °C, TMS): δ = 153.6 (s), 152.0 (s), 142.3 (s), 141.8 (s), 137.6 (s), 135.4 (s), 134.6 (s), 130.5 (s), 129.2 (s), 127.6 (s), 126.0 (s), 114.9 (s), 55.7 (s), 34.4 (s), 30.4 (s), 28.4 (s), 15.6 (s). HRMS (ESI) *m/z*: calcd. for C<sub>29</sub>H<sub>37</sub>O<sub>2</sub> [M+H]<sup>+</sup>: 417.2789, found: 417.2783.

#### 2,6-Di-*tert*-butyl-4-((4-(*tert*-butyl)phenyl)(4-hydroxyphenyl)methyl)phenol (7d)

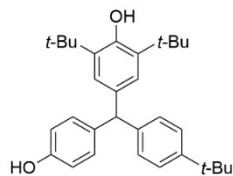

According to the general procedure, work-up and flash column chromatography (hexane/EtOAc: 10:1) gave product **7d** (80.1 mg, 0.18 mmol, 90%) as a yellow solid. mp: 160.8-161.1 °C. <sup>1</sup>H NMR (400 MHz, CDCl<sub>3</sub>, 25 °C, TMS): δ = 7.26-7.28 (m, 2H), 6.97-7.03 (m, 4H), 6.90 (s, 2H), 6.71-6.75 (m, 2H), 5.33 (s, 1H), 5.06 (s, 1H), 4.72 (s, 1H), 1.36 (s, 18H), 1.30 (s, 9H); <sup>13</sup>C NMR (100 MHz, CDCl<sub>3</sub>, 25 °C, TMS): δ = 153.7 (s), 152.0 (s), 148.7 (s), 142.0 (s), 137.5 (s), 135.3 (s), 134.6 (s), 130.5 (s), 128.8 (s), 126.0 (s), 125.0 (s), 114.9 (s), 55.6 (s), 34.4 (s), 34.3 (s), 31.4 (s), 30.3 (s). HRMS (ESI) *m/z*: calcd. for C<sub>31</sub>H<sub>41</sub>O<sub>2</sub> [M+H]<sup>+</sup>: 445.3102, found: 445.3096.

#### 2,6-Di-*tert*-butyl-4-((4-hydroxyphenyl)(3-methoxyphenyl)methyl)phenol (7e)

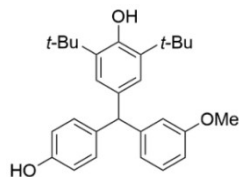

According to the general procedure, work-up and flash column chromatography (hexane/EtOAc: 10:1) gave product **7e** (73.7 mg, 0.18 mmol, 88%) as a yellow oil. <sup>1</sup>H NMR (400 MHz, CDCl<sub>3</sub>, 25 °C, TMS): δ = 7.15-7.19 (m, 1H), 6.95-9.97 (m, 2H), 6.89-6.90 (m, 2H), 6.67-6.74 (m, 5H), 5.33 (s, 1H), 5.12 (s, 1H), 5.07 (s, 1H), 3.72 (s, 3H), 1.35 (s, 18H); <sup>13</sup>C NMR (100 MHz, CDCl<sub>3</sub>, 25 °C, TMS): δ = 159.4 (s), 153.8 (s), 152.1 (s), 146.9 (s), 137.0 (s), 135.5 (s), 134.3 (s), 130.5 (s), 129.1 (s), 126.0 (s), 122.1 (s), 115.4 (s), 115.0 (s), 111.2 (s), 56.0 (s), 55.2 (s), 34.4 (s), 30.4 (s). HRMS (ESI) *m/z*: calcd. for C<sub>28</sub>H<sub>35</sub>O<sub>3</sub> [M+H]<sup>+</sup>: 419.2581, found: 419.2575.

### 2,6-Di-*tert*-butyl-4-((4-hydroxyphenyl)(4-isopropoxyphenyl)methyl)phenol (7f)

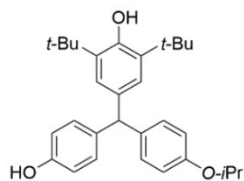

According to the general procedure, work-up and flash column chromatography (hexane/EtOAc: 5:1) gave product **7f** (76.9 mg, 0.17 mmol, 86%) as a yellow oil. <sup>1</sup>H NMR (400 MHz, CDCl<sub>3</sub>, 25 °C, TMS): δ = 6.95-6.99 (m, 4H), 6.88 (s, 2H), 7.78-7.80 (m, 2H), 6.72-6.74 (m, 2H), 5.31 (s, 1H), 5.05 (s, 1H), 4.76 (s, 1H), 4.46-4.55 (m, 1H), 1.35 (s, 18H), 1.31 (d, *J* = 6.0, 6H); <sup>13</sup>C NMR (100 MHz, CDCl<sub>3</sub>, 25 °C, TMS): δ = 171.3 (s), 156.0 (s), 153.9 (s), 151.9 (s), 137.2 (s), 135.4 (s), 134.9 (s), 130.4 (s), 130.2 (s), 125.9 (s), 115.6 (s), 114.9 (s), 60.5 (s), 34.3 (s), 30.3 (s), 22.1 (s), 21.1 (s). HRMS (ESI) *m/z*: calcd. for C<sub>30</sub>H<sub>39</sub>O<sub>3</sub> [M+H]<sup>+</sup>: 447.2894, found: 447.2890.

### 2,6-Di-*tert*-butyl-4-((2-hydroxyphenyl)(4-hydroxyphenyl)methyl)phenol (7h)

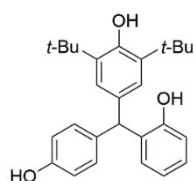

According to the general procedure, work-up and flash column chromatography (hexane/EtOAc: 5:1) gave product **7h** (64.8 mg, 0.16 mmol, 80%) as a yellow oil. <sup>1</sup>H NMR (400 MHz, DMSO-*d*<sub>6</sub>, 25 °C, TMS): δ = 9.16 (s, 2H), 6.96-7.00 (m, 2H), 6.72-6.82 (m, 4H), 6.67-6.69 (m, 4H), 5.95 (s, 1H), 1.29 (s, 18H); <sup>13</sup>C NMR (100 MHz, DMSO-*d*<sub>6</sub>, 25 °C, TMS): δ = 159.8 (s), 159.7 (s), 156.8 (s), 143.7 (s), 143.6 (s), 139.7 (s), 136.3 (s), 134.6 (s), 134.5 (s), 131.8 (s), 130.4 (s), 123.5 (s), 123.4 (s), 120.1 (s), 47.5 (s), 39.6 (s), 35.7 (s). HRMS (ESI) *m/z*: calcd. for C<sub>27</sub>H<sub>33</sub>O<sub>3</sub> [M+H]<sup>+</sup>: 405.2425, found: 405.2420.

### 2,6-Di-*tert*-butyl-4-((4-hydroxy-3-methoxyphenyl)(4-hydroxyphenyl)methyl)phenol (7i)

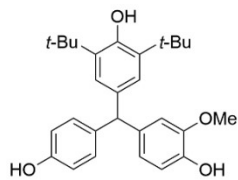

According to the general procedure, work-up and flash column chromatography (hexane/EtOAc: 5:1) gave product **7i** (68.73 mg, 0.16 mmol, 79%) as a yellow oil. <sup>1</sup>H NMR (400 MHz, CDCl<sub>3</sub>, 25 °C, TMS): δ = 6.95-6.97 (m, 2H), 6.89 (s, 2H), 6.80-6.82 (m, 2H), 6.71-6.74 (m, 2H), 6.62-6.63 (m, 1H), 6.55-6.58 (m, 1H), 5.49 (s, 1H), 5.29 (s, 1H), 5.06 (s, 1H), 4.76 (s, 1H), 3.76 (s, 3H), 1.36 (s, 18H); <sup>13</sup>C NMR (100 MHz, CDCl<sub>3</sub>, 25 °C, TMS): δ = 153.7 (s), 152.0 (s), 146.2 (s), 143.7 (s), 137.6 (s), 137.2 (s), 135.4 (s), 134.6 (s), 130.4 (s), 125.9 (s), 122.1 (s), 114.9 (s), 113.9 (s), 112.1 (s), 55.9 (s), 55.6 (s), 34.4 (s), 30.4 (s). HRMS (ESI) *m/z*: calcd. for C<sub>28</sub>H<sub>35</sub>O<sub>4</sub> [M+H]<sup>+</sup>: 435.2530, found: 435.2523.

### 2,6-Di-*tert*-butyl-4-((2,5-dimethoxyphenyl)(4-hydroxyphenyl)methyl)phenol (7j)

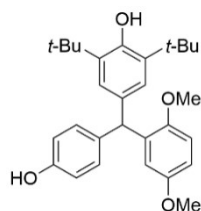

According to the general procedure, work-up and flash column chromatography (hexane/EtOAc: 5:1) gave product **7j** (71.82 mg, 0.16 mmol, 80%) as a yellow oil. <sup>1</sup>H NMR (400 MHz, CDCl<sub>3</sub>, 25 °C, TMS): δ = 6.94-6.96 (m, 2H), 6.88-6.91 (m, 2H), 6.78-6.84 (m, 2H), 6.78-6.72 (m, 2H), 6.47-6.48 (m, 1H), 5.71 (s, 1H), 5.03 (s, 1H), 4.74 (s, 1H), 3.67 (s, 3H), 3.64 (s, 3H), 1.35 (s, 18H); <sup>13</sup>C NMR (100 MHz, CDCl<sub>3</sub>, 25 °C, TMS): δ = 153.5 (s), 153.4 (s), 151.9 (s), 151.6 (s), 136.8 (s), 135.4 (s), 135.3 (s), 134.1 (s), 130.4 (s), 126.1 (s), 117.0 (s), 114.8 (s), 112.0 (s), 111.0 (s), 56.5 (s), 55.6 (s), 48.8 (s), 34.3 (s), 30.4 (s). HRMS (ESI) *m/z*: calcd. for C<sub>29</sub>H<sub>37</sub>O<sub>4</sub> [M+H]<sup>+</sup>: 449.2687, found: 449.2681.

### 2,6-Di-*tert*-butyl-4-((4-hydroxyphenyl)(3-nitrophenyl)methyl)phenol (**7k**)

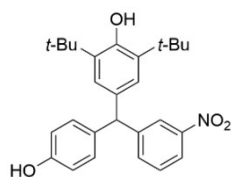

According to the general procedure, work-up and flash column chromatography (hexane/EtOAc: 5:1) gave product **7k** (71.2 mg, 0.16 mmol, 82%) as a yellow oil.  $^1\text{H}$  NMR (400 MHz,  $\text{CDCl}_3$ , 25  $^\circ\text{C}$ , TMS):  $\delta$  = 8.00-8.07 (m, 2H), 7.41-7.46 (m, 2H), 6.94-6.98 (m, 2H), 6.56 (s, 2H), 6.75-6.79 (m, 2H), 5.46 (s, 1H), 5.13 (s, 1H), 4.85 (s, 1H), 1.36 (s, 18H);  $^{13}\text{C}$  NMR (100 MHz,  $\text{CDCl}_3$ , 25  $^\circ\text{C}$ , TMS):  $\delta$  = 154.2 (s), 152.5 (s), 148.3 (s), 147.5 (s), 135.9 (s), 135.6 (s), 135.4 (s), 133.0 (s), 130.4 (s), 129.0 (s), 125.8 (s), 124.1 (s), 121.3 (s), 115.4 (s), 55.7 (s), 34.4 (s), 30.3 (s). HRMS (ESI)  $m/z$ : calcd. for  $\text{C}_{27}\text{H}_{32}\text{NO}_4$   $[\text{M}+\text{H}]^+$ : 434.2326, found: 434.2321.

### 2,6-Di-*tert*-butyl-4-((4-hydroxyphenyl)(4-(trifluoromethyl)phenyl)methyl)phenol (**7l**)

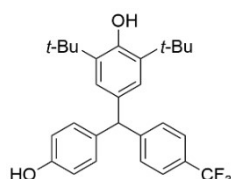

According to the general procedure, work-up and flash column chromatography (hexane/EtOAc: 5:1) gave product **7l** (76.8 mg, 0.17 mmol, 84%) as a yellow solid. mp: 112.3-112.5  $^\circ\text{C}$ .  $^1\text{H}$  NMR (400 MHz,  $\text{CDCl}_3$ , 25  $^\circ\text{C}$ , TMS):  $\delta$  = 7.50-7.53 (m, 2H), 7.20-7.26 (m, 2H), 6.93-6.96 (m, 2H), 6.86 (s, 2H), 6.73-6.77 (m, 2H), 5.42 (s, 1H), 5.11 (s, 1H), 4.76 (s, 1H), 1.36 (s, 18H);  $^{13}\text{C}$  NMR (100 MHz,  $\text{CDCl}_3$ , 25  $^\circ\text{C}$ , TMS):  $\delta$  = 154.0 (s), 152.3 (s), 149.3 (s), 136.3 (s), 135.8 (s), 132.0 (d,  $J(\text{C},\text{F})$  = 297.7 Hz), 130.5 (s), 129.7 (s), 129.6 (s), 125.9 (s), 125.1 (q,  $J(\text{C},\text{F})$  = 3.7 Hz), 120.8 (s), 115.2 (s), 55.8 (s), 34.4 (s), 30.3 (s).  $^{19}\text{F}$  NMR (376 MHz,  $\text{CDCl}_3$ , 25  $^\circ\text{C}$ , TMS):  $\delta$  = -62.3 (s). HRMS (ESI)  $m/z$ : calcd. for  $\text{C}_{28}\text{H}_{32}\text{F}_3\text{O}_2$   $[\text{M}+\text{H}]^+$ : 457.2349, found: 457.2345.

### 2,6-Di-*tert*-butyl-4-((3-fluorophenyl)(4-hydroxyphenyl)methyl)phenol (**7m**)

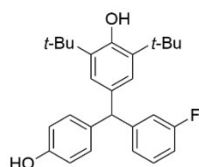

According to the general procedure, work-up and flash column chromatography (hexane/EtOAc: 5:1) gave product **7m** (70.3 mg, 0.17 mmol, 86%) as a yellow oil.  $^1\text{H}$  NMR (400 MHz,  $\text{CDCl}_3$ , 25  $^\circ\text{C}$ , TMS):  $\delta$  = 7.19-7.25 (m, 1H), 6.94-6.98 (m, 2H), 6.84-6.91 (m, 4H), 6.73-6.82 (m, 3H), 5.36 (s, 1H), 5.10 (s, 1H), 4.82 (s, 1H), 1.36 (s, 18H);  $^{13}\text{C}$  NMR (100 MHz,  $\text{CDCl}_3$ , 25  $^\circ\text{C}$ , TMS):  $\delta$  = 162.9 (d,  $J(\text{C},\text{F})$  = 243.7 Hz), 153.9 (s), 152.2 (s), 147.9 (s), 136.5 (s), 135.6 (s), 133.8 (s), 130.5 (s), 129.45 (d,  $J(\text{C},\text{F})$  = 8.2 Hz), 125.9 (s), 125.0 (s), 116.2 (d,  $J(\text{C},\text{F})$  = 21.4 Hz), 115.1 (s), 112.9 (d,  $J(\text{C},\text{F})$  = 21.0 Hz), 55.7 (s), 34.4 (s), 30.3 (s);  $^{19}\text{F}$  NMR (376 MHz,  $\text{CDCl}_3$ , 25  $^\circ\text{C}$ , TMS):  $\delta$  = -113.7 (s). HRMS (ESI)  $m/z$ : calcd. for  $\text{C}_{27}\text{H}_{32}\text{FO}_2$   $[\text{M}+\text{H}]^+$ : 407.2381, found: 407.2373.

### 2,6-Di-*tert*-butyl-4-((2-fluorophenyl)(4-hydroxyphenyl)methyl)phenol (**7n**)

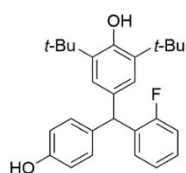

According to the general procedure, work-up and flash column chromatography (hexane/EtOAc: 5:1) gave product **7n** (65.9 mg, 0.16 mmol, 81%) as a yellow oil.  $^1\text{H}$  NMR (400 MHz,  $\text{CDCl}_3$ , 25  $^\circ\text{C}$ , TMS):  $\delta$  = 7.15-7.21 (m, 1H), 6.92-7.05 (m, 5H), 6.86-6.88 (m, 2H), 6.73-6.75 (m, 2H), 5.67 (s, 1H), 5.08 (s, 1H), 4.74 (s, 1H), 1.35 (s, 18H);  $^{13}\text{C}$  NMR (100 MHz,  $\text{CDCl}_3$ , 25  $^\circ\text{C}$ , TMS):  $\delta$  = 160.7 (d,  $J(\text{C},\text{F})$  = 244.8 Hz), 153.8 (s), 152.2 (s), 135.9 (s), 135.5 (s), 133.1 (s), 132.2 (d,  $J(\text{C},\text{F})$  = 14.3 Hz), 130.7 (d,  $J(\text{C},\text{F})$  = 4.0 Hz), 130.3 (s), 127.8 (d,  $J(\text{C},\text{F})$  = 8.3 Hz), 125.9 (s), 123.7 (d,  $J(\text{C},\text{F})$  = 3.5 Hz), 115.3 (s), 115.1 (d,  $J(\text{C},\text{F})$  = 9.2 Hz), 48.4 (s), 34.4 (s), 30.3 (s);  $^{19}\text{F}$  NMR (376 MHz,  $\text{CDCl}_3$ , 25  $^\circ\text{C}$ , TMS):  $\delta$  = -116.7 (s). HRMS (ESI)  $m/z$ : calcd. for  $\text{C}_{27}\text{H}_{32}\text{FO}_2$   $[\text{M}+\text{H}]^+$ : 407.2381, found: 407.2376.

#### 2,6-Di-*tert*-butyl-4-((4-fluorophenyl)(4-hydroxyphenyl)methyl)phenol (**7o**)

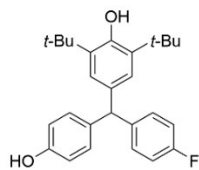

According to the general procedure, work-up and flash column chromatography (hexane/EtOAc: 5:1) gave product **7o** (69.2 mg, 0.17 mmol, 85%) as a yellow solid. mp: 162.3-162.7 °C. <sup>1</sup>H NMR (400 MHz, CDCl<sub>3</sub>, 25 °C, TMS): δ = 7.15-7.21 (m, 1H), 6.92-7.05 (m, 5H), 6.86-6.88 (m, 2H), 6.73-6.75 (m, 2H), 5.67 (s, 1H), 5.08 (s, 1H), 4.74 (s, 1H), 1.35 (s, 18H); <sup>13</sup>C NMR (100 MHz, CDCl<sub>3</sub>, 25 °C, TMS): δ = 161.3 (d, *J*(C,F) = 242.8 Hz), 153.8 (s), 152.1 (s), 140.9 (s), 137.0 (s), 135.5 (s), 134.3 (s), 130.71 (d, *J*(C,F) = 7.8 Hz), 130.5 (s), 125.6 (s), 115.0 (d, *J*(C,F) = 8.0 Hz), 114.8 (s), 55.2 (s), 34.4 (s), 30.3 (s); <sup>19</sup>F NMR (376 MHz, CDCl<sub>3</sub>, 25 °C, TMS): δ = -117.5 (s). HRMS (ESI) *m/z*: calcd. for C<sub>27</sub>H<sub>32</sub>FO<sub>2</sub> [M+H]<sup>+</sup>: 407.2381, found: 407.2375.

#### 4-((3-Bromophenyl)(4-hydroxyphenyl)methyl)-2,6-di-*tert*-butylphenol (**7p**)

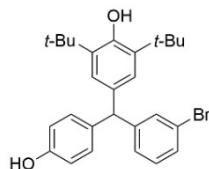

According to the general procedure, work-up and flash column chromatography (hexane/EtOAc: 5:1) gave product **7p** (80.2 mg, 0.17 mmol, 86%) as a yellow oil. <sup>1</sup>H NMR (400 MHz, CDCl<sub>3</sub>, 25 °C, TMS): δ = 7.31-7.33 (m, 1H), 7.26-7.27 (m, 1H), 7.11-7.15 (m, 1H), 7.01-7.03 (m, 1H), 6.94-6.96 (m, 2H), 6.86 (s, 2H), 6.73-6.77 (m, 2H), 5.33 (s, 1H), 5.10 (s, 1H), 4.71 (s, 1H), 1.36 (s, 18H); <sup>13</sup>C NMR (100 MHz, CDCl<sub>3</sub>, 25 °C, TMS): δ = 153.9 (s), 152.3 (s), 136.4 (s), 135.6 (s), 133.6 (s), 132.4 (s), 130.7 (s), 129.7 (s), 129.2 (s), 128.0 (s), 125.9 (s), 122.4 (s), 115.1 (s), 100.0 (s), 55.7 (s), 34.4 (s), 30.3 (s). HRMS (ESI) *m/z*: calcd. for C<sub>27</sub>H<sub>32</sub>BrO<sub>2</sub> [M+H]<sup>+</sup>: 467.1581, found: 467.1577.

#### 4-((2-Bromophenyl)(4-hydroxyphenyl)methyl)-2,6-di-*tert*-butylphenol (**7q**)

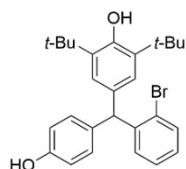

According to the general procedure, work-up and flash column chromatography (hexane/EtOAc: 5:1) gave product **7q** (75.7 mg, 0.16 mmol, 81%) as a yellow oil. <sup>1</sup>H NMR (400 MHz, CDCl<sub>3</sub>, 25 °C, TMS): δ = 7.53-7.55 (m, 1H), 7.18-7.22 (m, 1H), 7.03-7.07 (m, 1H), 6.92-6.97 (m, 3H), 6.84 (s, 2H), 6.72-6.75 (m, 2H), 5.76 (s, 1H), 5.08 (s, 1H), 4.84 (s, 1H), 1.35 (s, 18H); <sup>13</sup>C NMR (100 MHz, CDCl<sub>3</sub>, 25 °C, TMS): δ = 153.8 (s), 152.2 (s), 144.4 (s), 135.6 (s), 135.5 (s), 133.3 (s), 133.0 (s), 131.1 (s), 130.7 (s), 127.7 (s), 127.1 (s), 126.2 (s), 125.5 (s), 115.0 (s), 55.0 (s), 34.4 (s), 30.4 (s). HRMS (ESI) *m/z*: calcd. for C<sub>27</sub>H<sub>32</sub>BrO<sub>2</sub> [M+H]<sup>+</sup>: 467.1581, found: 467.1573.

#### 4-((4-Bromophenyl)(4-hydroxyphenyl)methyl)-2,6-di-*tert*-butylphenol (**7r**)

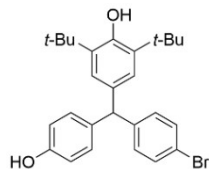

According to the general procedure, work-up and flash column chromatography (hexane/EtOAc: 5:1) gave product **7r** (80.2 mg, 0.17 mmol, 86%) as a yellow oil. <sup>1</sup>H NMR (400 MHz, CDCl<sub>3</sub>, 25 °C, TMS): δ = 7.36-7.39 (m, 2H), 6.93-6.98 (m, 4H), 6.85 (s, 2H), 6.72-6.76 (m, 2H), 5.32 (s, 1H), 5.08 (s, 1H), 4.83 (s, 1H), 1.35 (s, 18H); <sup>13</sup>C NMR (100 MHz, CDCl<sub>3</sub>, 25 °C, TMS): δ = 153.9 (s), 152.2 (s), 144.3 (s), 136.6 (s), 135.6 (s), 133.9 (s), 131.2 (s), 131.1 (s), 130.5 (s), 129.7 (s), 125.8 (s), 120.8 (s), 119.9 (s), 115.1 (s), 55.4 (s), 34.4 (s), 30.3 (s). HRMS (ESI) *m/z*: calcd. for C<sub>27</sub>H<sub>32</sub>BrO<sub>2</sub> [M+H]<sup>+</sup>: 467.1581, found: 467.1575.



#### 4-((3,5-Di-*tert*-butyl-4-hydroxyphenyl)(4-hydroxyphenyl)methyl)benzonitrile (7s)

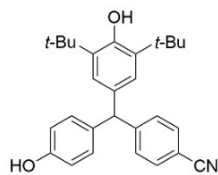

According to the general procedure, work-up and flash column chromatography (hexane/EtOAc: 5:1) gave product **7s** (63.8 mg, 0.15 mmol, 77%) as a yellow oil. <sup>1</sup>H NMR (400 MHz, CDCl<sub>3</sub>, 25 °C, TMS): δ = 7.55-7.57 (m, 2H), 7.20-7.22 (m, 2H), 6.92-6.94 (m, 2H), 6.83 (s, 2H), 6.75-6.78 (m, 2H), 5.41 (s, 1H), 5.13 (s, 1H), 4.95 (s, 1H), 1.35 (s, 18H); <sup>13</sup>C NMR (100 MHz, CDCl<sub>3</sub>, 25 °C, TMS): δ = 154.2 (s), 152.4 (s), 150.9 (s), 135.8 (s), 135.5 (s), 133.0 (s), 132.0 (s), 130.5 (s), 130.1 (s), 125.8 (s), 119.1 (s), 115.3 (s), 109.8 (s), 56.0 (s), 34.4 (s), 30.3 (s); HRMS (ESI) *m/z*: calcd. for C<sub>28</sub>H<sub>32</sub>NO<sub>2</sub> [M+H]<sup>+</sup>: 414.2428, found: 414.2424.

#### 3-((3,5-Di-*tert*-butyl-4-hydroxyphenyl)(4-hydroxyphenyl)methyl)benzonitrile (7t)

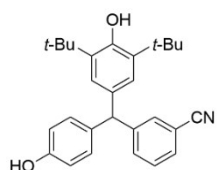

According to the general procedure, work-up and flash column chromatography (hexane/EtOAc: 5:1) gave product **7t** (65.4 mg, 0.16 mmol, 79%) as a yellow oil. <sup>1</sup>H NMR (400 MHz, CDCl<sub>3</sub>, 25 °C, TMS): δ = 7.48-7.50 (m, 1H), 7.36-7.39 (m, 3H), 6.92-6.94 (m, 2H), 6.76-6.82 (m, 2H), 5.39 (s, 1H), 5.13 (s, 1H), 4.83 (s, 1H), 1.36 (s, 18H); <sup>13</sup>C NMR (100 MHz, CDCl<sub>3</sub>, 25 °C, TMS): δ = 154.2 (s), 152.5 (s), 146.8 (s), 135.9 (s), 135.6 (s), 133.9 (s), 133.1 (s), 132.8 (s), 130.5 (s), 129.9 (s), 128.9 (s), 125.8 (s), 119.1 (s), 115.3 (s), 112.1 (s), 55.5 (s), 34.4 (s), 30.3 (s). HRMS (ESI) *m/z*: calcd. for C<sub>28</sub>H<sub>32</sub>NO<sub>2</sub> [M+H]<sup>+</sup>: 414.2428, found: 414.2421.

#### 2,6-Di-*tert*-butyl-4-((4-hydroxyphenyl)(thiophen-3-yl)methyl)phenol (7u)

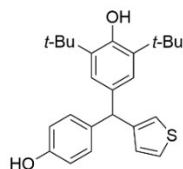

According to the general procedure, work-up and flash column chromatography (hexane/EtOAc: 5:1) gave product **7u** (64.8 mg, 0.16 mmol, 82%) as a yellow solid. mp: 121.8-122.1 °C. <sup>1</sup>H NMR (400 MHz, CDCl<sub>3</sub>, 25 °C, TMS): δ = 7.23-7.25 (m, 1H), 7.00-7.02 (m, 2H), 6.92-6.94 (m, 2H), 6.85-6.86 (m, 1H), 6.70-6.75 (m, 3H), 5.33 (s, 1H), 5.07 (s, 1H), 4.70 (s, 1H), 1.37 (s, 18H); <sup>13</sup>C NMR (100 MHz, CDCl<sub>3</sub>, 25 °C, TMS): δ = 153.8 (s), 152.2 (s), 146.2 (s), 137.1 (s), 135.5 (s), 134.5 (s), 130.1 (s), 128.9 (s), 125.5 (s), 125.2 (s), 122.3 (s), 115.0 (s), 51.8 (s), 34.4 (s), 30.4 (s). HRMS (ESI) *m/z*: calcd. for C<sub>25</sub>H<sub>31</sub>O<sub>2</sub>S [M+H]<sup>+</sup>: 395.2040, found: 395.2035.

#### 2,6-Di-*tert*-butyl-4-((2,3-dihydrobenzofuran-6-yl)(4-hydroxyphenyl)methyl)phenol (7x)

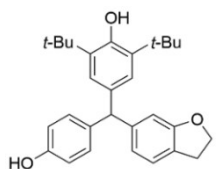

According to the general procedure, work-up and flash column chromatography (hexane/EtOAc: 5:1) gave product **7x** (73.3 mg, 0.17 mmol, 85%) as a yellow oil. <sup>1</sup>H NMR (400 MHz, CDCl<sub>3</sub>, 25 °C, TMS): δ = 6.93-6.97 (m, 3H), 6.89 (s, 2H), 6.80-6.83 (m, 1H), 6.71-6.75 (m, 2H), 6.67-6.69 (m, 1H), 5.43 (s, 1H), 5.06 (s, 1H), 4.79 (s, 1H), 4.54 (t, *J* = 8.7 Hz, 2H), 3.14 (t, *J* = 8.7 Hz, 2H), 1.36 (s, 18H); <sup>13</sup>C NMR (100 MHz, CDCl<sub>3</sub>, 25 °C, TMS): δ = 158.3 (s), 153.6 (s), 152.0 (s), 137.7 (s), 137.4 (s), 135.4 (s), 134.9 (s), 130.5 (s), 128.8 (s), 126.8 (s), 125.9 (s), 125.8 (s), 114.9 (s), 108.7 (s), 71.2 (s), 55.4 (s), 34.4 (s), 30.4 (s), 29.8 (s); HRMS (ESI) *m/z*: calcd. for C<sub>29</sub>H<sub>35</sub>O<sub>3</sub> [M+H]<sup>+</sup>: 431.2581, found: 431.2573.

#### 4-((3,5-Di-*tert*-butyl-4-hydroxyphenyl)(4-hydroxyphenyl)methyl)benzaldehyde (**7z**)

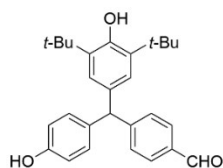

According to the general procedure, work-up and flash column chromatography (hexane/EtOAc: 5:1) gave product **7z** (55.2 mg, 0.13 mmol, 66%) as a yellow oil. <sup>1</sup>H NMR (400 MHz, CDCl<sub>3</sub>, 25 °C, TMS): δ = 9.98 (s, 1H), 7.78-7.80 (m, 2H), 7.26-7.29 (m, 2H), 6.94-6.96 (m, 2H), 6.86 (s, 2H), 6.75-6.78 (m, 2H), 5.45 (s, 1H), 5.12 (s, 1H), 5.02 (s, 1H), 1.35 (s, 18H); <sup>13</sup>C NMR (100 MHz, CDCl<sub>3</sub>, 25 °C, TMS): δ = 192.2 (s), 154.1 (s), 152.6 (s), 152.4 (s), 136.0 (s), 135.7 (s), 134.5 (s), 133.4 (s), 130.5 (s), 130.0 (s), 129.8 (s), 125.9 (s), 115.2 (s), 34.4 (s), 30.3 (s). HRMS (ESI) *m/z*: calcd. for C<sub>28</sub>H<sub>33</sub>O<sub>3</sub> [M+H]<sup>+</sup>: 417.2425, found: 417.2420.

#### 4-((4-Hydroxyphenyl)(phenyl)methyl)-2,6-dimethylphenol (**7ab**)

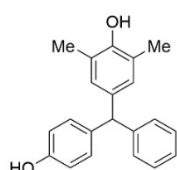

According to the general procedure, work-up and flash column chromatography (hexane/EtOAc: 5:1) gave product **7ab** (51.9 mg, 0.17 mmol, 85%) as a yellow solid. mp: 127.5-127.9 °C. <sup>1</sup>H NMR (400 MHz, CDCl<sub>3</sub>, 25 °C, TMS): δ = 7.25-7.29 (m, 2H), 7.17-7.21 (m, 1H), 7.09-7.10 (m, 2H), 6.94-6.97 (m, 2H), 6.70-6.75 (m, 4H), 5.35 (s, 1H), 4.80 (s, 1H), 4.53 (s, 1H), 2.17 (s, 6H); <sup>13</sup>C NMR (100 MHz, CDCl<sub>3</sub>, 25 °C, TMS): δ = 153.8 (s), 150.6 (s), 144.7 (s), 136.8 (s), 135.8 (s), 130.5 (s), 129.5 (s), 129.3 (s), 128.2 (s), 126.1 (s), 122.8 (s), 115.1 (s), 55.3 (s), 16.1 (s); HRMS (ESI) *m/z*: calcd. for C<sub>21</sub>H<sub>21</sub>O<sub>2</sub> [M+H]<sup>+</sup>: 305.1537, found: 305.1531.

#### 4-((4-Hydroxyphenyl)(phenyl)methyl)-2,6-diisopropylphenol (**7ac**)

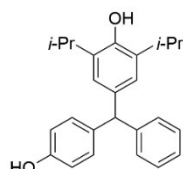

According to the general procedure, work-up and flash column chromatography (hexane/EtOAc: 5:1) gave product **7ac** (60.1 mg, 0.17 mmol, 83%) as a yellow oil. <sup>1</sup>H NMR (400 MHz, CDCl<sub>3</sub>, 25 °C, TMS): δ = 7.24-7.28 (m, 2H), 7.15-7.20 (m, 1H), 7.09-7.10 (m, 2H), 6.95-6.98 (m, 2H), 6.77 (s, 2H), 6.70-6.75 (m, 2H), 5.40 (s, 1H), 4.77 (s, 1H), 4.68 (s, 1H), 3.00-3.14 (m, 2H), 1.17 (d, *J* = 6.9 Hz, 12H); <sup>13</sup>C NMR (100 MHz, CDCl<sub>3</sub>, 25 °C, TMS): δ = 153.7 (s), 148.3 (s), 145.0 (s), 137.1 (s), 135.9 (s), 133.3 (s), 130.5 (s), 129.3 (s), 128.2 (s), 126.0 (s), 124.5 (s), 115.0 (s), 55.8 (s), 27.3 (s), 22.7 (s); HRMS (ESI) *m/z*: calcd. for C<sub>25</sub>H<sub>29</sub>O<sub>2</sub> [M+H]<sup>+</sup>: 361.2163, found: 361.2159.

#### 5'-((4-Hydroxyphenyl)(phenyl)methyl)-[1,1':3',1''-terphenyl]-2'-ol (**7ad**)

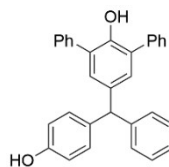

According to the general procedure, work-up and flash column chromatography (hexane/EtOAc: 5:1) gave product **7ad** (62.6 mg, 0.15 mmol, 73%) as a yellow oil. <sup>1</sup>H NMR (400 MHz, CDCl<sub>3</sub>, 25 °C, TMS): δ = 7.48-7.50 (m, 4H), 7.40-7.44 (m, 4H), 7.24-7.35 (m, 4H), 7.16-7.21 (m, 3H), 7.02-7.04 (m, 4H), 6.72-6.74 (m, 2H), 5.48 (s, 1H), 5.35 (s, 1H), 4.87 (s, 1H); <sup>13</sup>C NMR (100 MHz, CDCl<sub>3</sub>, 25 °C, TMS): δ = 153.9 (s), 147.7 (s), 144.4 (s), 137.7 (s), 136.5 (s), 136.4 (s), 130.80 (s), 130.54 (s), 129.4 (s), 129.3 (s), 128.83 (s), 128.5 (s), 128.4 (s), 127.6 (s), 126.23 (s), 115.2 (s), 55.45 (s). HRMS (ESI) *m/z*: calcd. for C<sub>31</sub>H<sub>25</sub>O<sub>2</sub> [M+H]<sup>+</sup>: 429.1850, found: 429.1846.

#### 4-((4-Aminophenyl)(phenyl)methyl)-2,6-di-*tert*-butylphenol (3a')

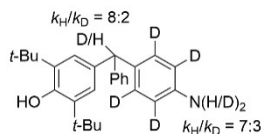

According to the general procedure, work-up and flash column chromatography (Hexane/EtOAc: 10:1) gave product **3a'** (68.9 mg, 0.16 mmol, 82%) as a yellow oil. <sup>1</sup>H NMR (400 MHz, Acetone-*d*<sub>6</sub>, 25 °C, TMS): δ = 7.11-7.17 (m, 2H), 6.99-7.07 (m, 3H), 6.85 (s, 2H), 5.76-5.81 (s, 1H), 5.35 (s, 0.8H), 4.35 (s, 1.4H), 1.22 (s, 18H); <sup>13</sup>C NMR (100 MHz, Acetone-*d*<sub>6</sub>, 25 °C, TMS): δ = 152.2 (s), 145.3 (s), 137.1 (s), 135.1 (s), 129.2 (s), 129.1 (s), 128.1 (s), 127.9 (s), 125.9 (s), 125.7 (s), 125.6 (s), 119.0 (s), 56.0 (s), 34.3 (s), 29.8 (s). HRMS (ESI) *m/z*: calcd. for C<sub>27</sub>H<sub>34</sub>N<sub>2</sub>O [M+H]<sup>+</sup>: 388.2635, found: 388.2629.

#### 2,6-Di-*tert*-butyl-4-((diphenylphosphaneyl)(phenyl)methyl)phenol (9a)

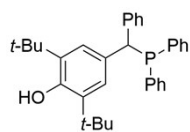

According to the general procedure, work-up and flash column chromatography (Hexane/EtOAc: 20:1) gave product **9a** (85.6 mg, 0.18 mmol, 89%) as a colorless oil. <sup>1</sup>H NMR (400 MHz, CDCl<sub>3</sub>, 25 °C, TMS): δ = 7.62-7.68 (m, 2H), 7.14-7.51 (m, 13H), 6.94-6.95 (m, 2H), 5.06 (s, 1H), 4.89 (d, *J* = 17.5 Hz, 1H), 1.29 (s, 18H); <sup>13</sup>C NMR (100 MHz, CDCl<sub>3</sub>, 25 °C, TMS): δ = 152.9 (s), 138.1 (s), 135.3 (d, *J*(C,P) = 1.6 Hz), 133.2 (d, *J*(C,P) = 17.1 Hz), 133.0 (d, *J*(C,P) = 9.3 Hz), 131.7 (d, *J*(C,P) = 2.4 Hz), 130.9 (d, *J*(C,P) = 2.4 Hz), 130.8 (d, *J*(C,P) = 2.4 Hz), 130.0 (d, *J*(C,P) = 6.3 Hz), 129.8 (d, *J*(C,P) = 81.5 Hz), 129.3 (d, *J*(C,P) = 78.8 Hz), 129.1 (d, *J*(C,P) = 10.4 Hz), 128.4 (d, *J*(C,P) = 9.9 Hz), 128.1 (d, *J*(C,P) = 9.6 Hz), 127.0 (d, *J*(C,P) = 5.1 Hz), 126.9 (d, *J*(C,P) = 1.8 Hz), 51.2 (d, *J*(C,P) = 29.0 Hz), 34.3 (s), 30.2 (s). <sup>31</sup>P NMR (160 MHz, CDCl<sub>3</sub>, 25 °C, TMS): δ = 22.5. HRMS (ESI) *m/z*: calcd. for C<sub>33</sub>H<sub>38</sub>OP[M+H]<sup>+</sup>: 481.2655, found: 481.2651.

#### 2,6-Di-*tert*-butyl-4-((4-(diphenylphosphaneyl)phenyl)(phenyl)methylene)cyclohexa-2,5-dien-1-one (9b)

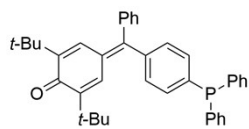

According to the general procedure, work-up and flash column chromatography (Hexane/EtOAc: 40:1) gave product **9b** (94.4 mg, 0.17 mmol, 85%) as a yellow oil. <sup>1</sup>H NMR (400 MHz, CDCl<sub>3</sub>, 25 °C, TMS): δ = 7.53-7.60 (m, 2H), 7.37-7.48 (m, 7H), 7.29-7.30 (m, 10H), 7.06 (s, 1H), 7.02 (s, 1H), 1.32 (d, *J* = 14.0 Hz, 18H); <sup>13</sup>C NMR (100 MHz, CDCl<sub>3</sub>, 25 °C, TMS): δ = 186.6 (s), 149.4 (s), 147.8 (s), 142.6 (s), 137.3 (d, *J*(C,P) = 10.9 Hz), 136.0 (s), 135.2 (s), 133.8 (d, *J*(C,P) = 19.5 Hz), 133.3 (d, *J*(C,P) = 9.6 Hz), 132.0 (s), 131.3 (d, *J*(C,P) = 2.3 Hz), 130.4 (s), 129.3 (d, *J*(C,P) = 57.7 Hz), 129.0 (d, *J*(C,P) = 25.3 Hz), 128.9 (d, *J*(C,P) = 4.3 Hz), 128.6 (d, *J*(C,P) = 6.9 Hz), 127.9 (s), 35.5 (s), 35.1 (s), 29.6 (s), 29.5 (s). <sup>31</sup>P NMR (160 MHz, CDCl<sub>3</sub>, 25 °C, TMS): δ = -5.37. HRMS (ESI) *m/z*: calcd. for C<sub>39</sub>H<sub>40</sub>OP[M+H]<sup>+</sup>: 555.2812, found: 555.2807.

#### 2,6-Di-*tert*-butyl-4-(phenyl(phenylamino)methyl)phenol (3a'')

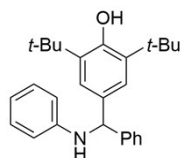

According to the general procedure, work-up and flash column chromatography (hexane/EtOAc: 40:1) gave product **3a''** (58.3 mg, 0.15 mmol, 75%) as a yellow oil. <sup>1</sup>H NMR (400 MHz, CDCl<sub>3</sub>, 25 °C, TMS): δ = 7.39-7.41 (m, 2H), 7.30-7.34 (m, 2H), 7.21-7.25 (m, 1H), 7.07-7.12 (m, 4H), 6.65-6.68 (m, 1H), 6.53-6.55 (m, 2H), 5.40 (s, 1H), 5.16 (s, 1H), 4.24 (s, 1H), 1.38 (s, 18H); <sup>13</sup>C NMR (100 MHz, CDCl<sub>3</sub>, 25 °C, TMS): δ = 153.1 (s), 147.7 (s), 143.1 (s), 136.0 (s), 134.1 (s), 129.1 (s), 128.6 (s), 127.1 (s), 126.9 (s), 124.6 (s), 117.3 (s), 113.4 (s), 63.2 (s), 34.4 (s), 30.3 (s).

# $^1\text{H}$ , $^{13}\text{C}$ , $^{31}\text{P}$ and $^{19}\text{F}$ NMR spectra

## 4-((4-Aminophenyl)(phenyl)methyl)-2,6-di-*tert*-butylphenol (3a)

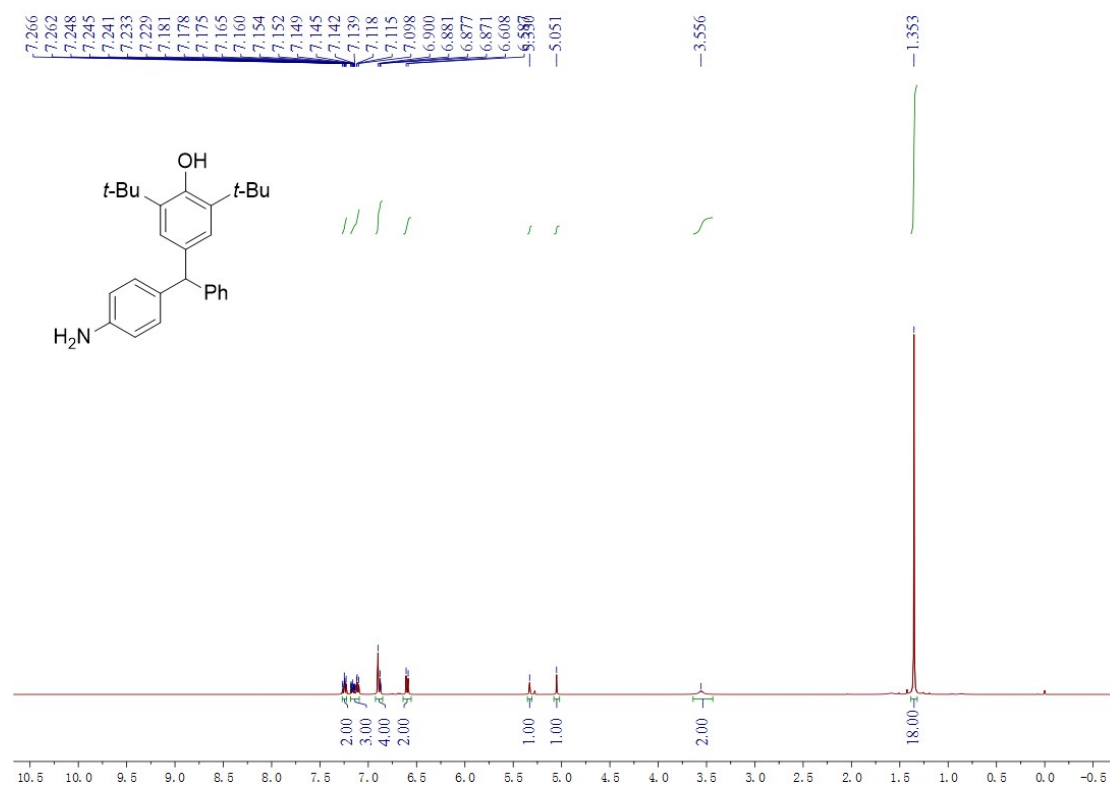

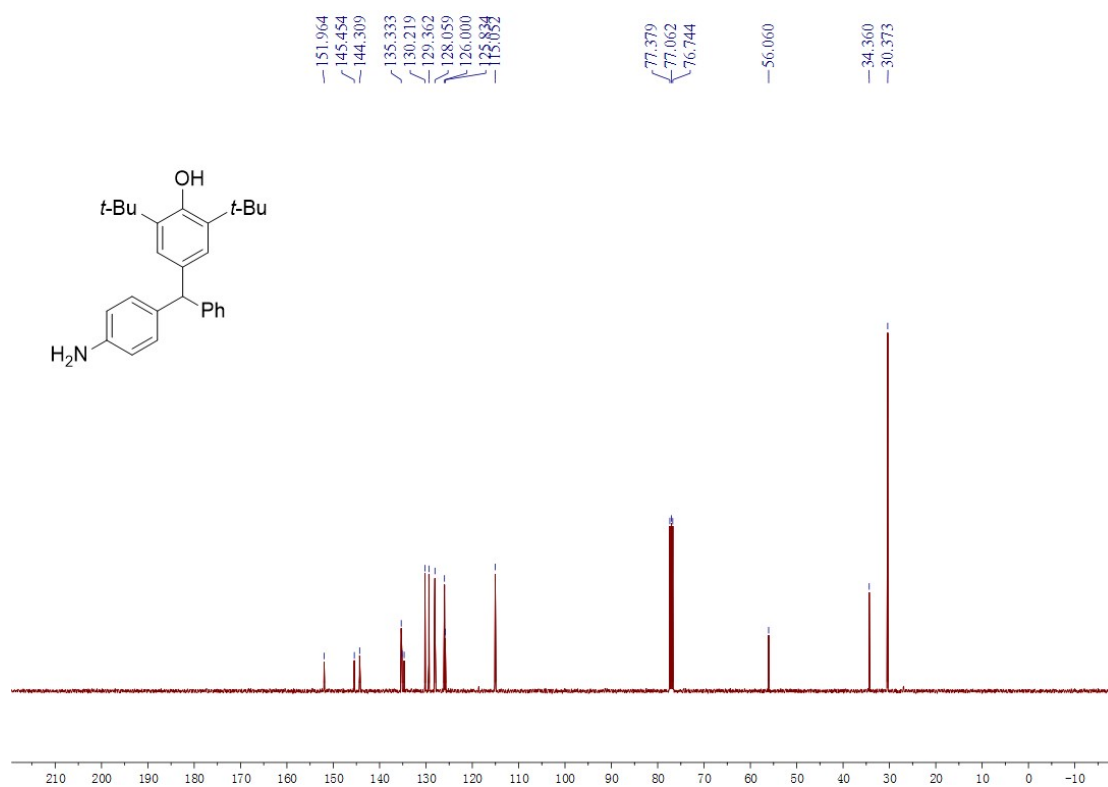

**4-((4-Amino-3-methylphenyl)(phenyl)methyl)-2,6-di-tert-butylphenol (3b)**

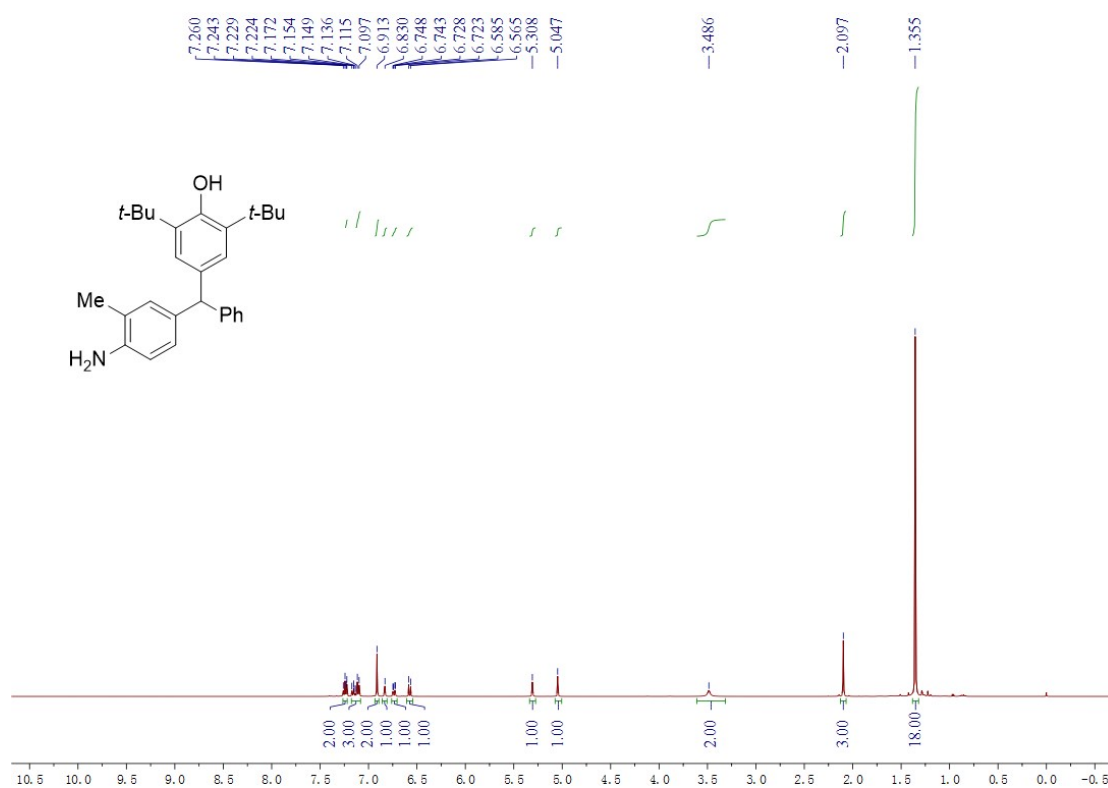

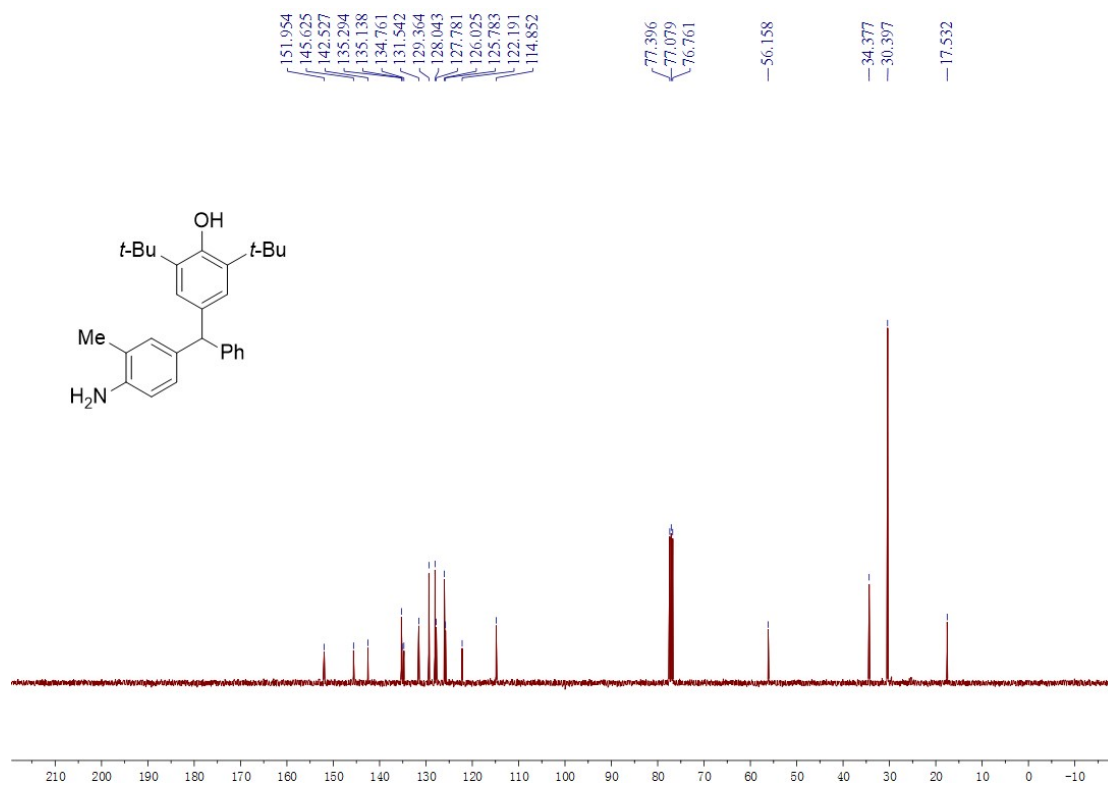

**4-((4-Amino-2-methylphenyl)(phenyl)methyl)-2,6-di-tert-butylphenol (3c)**

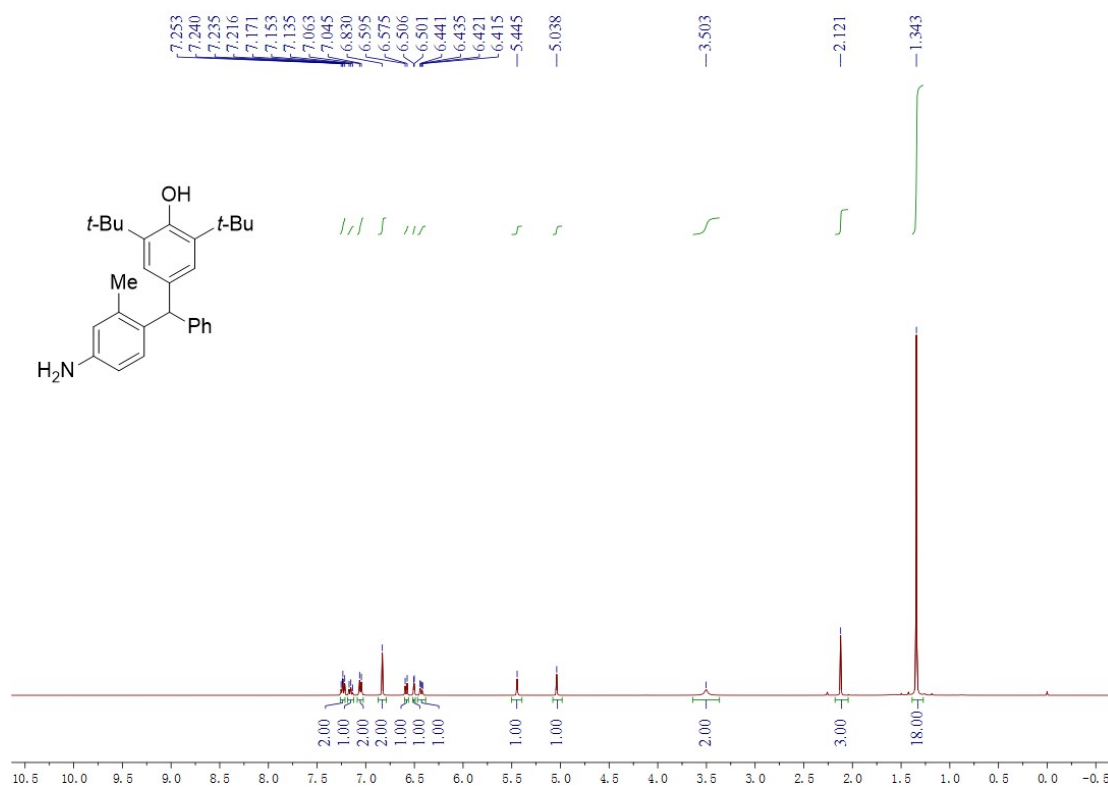

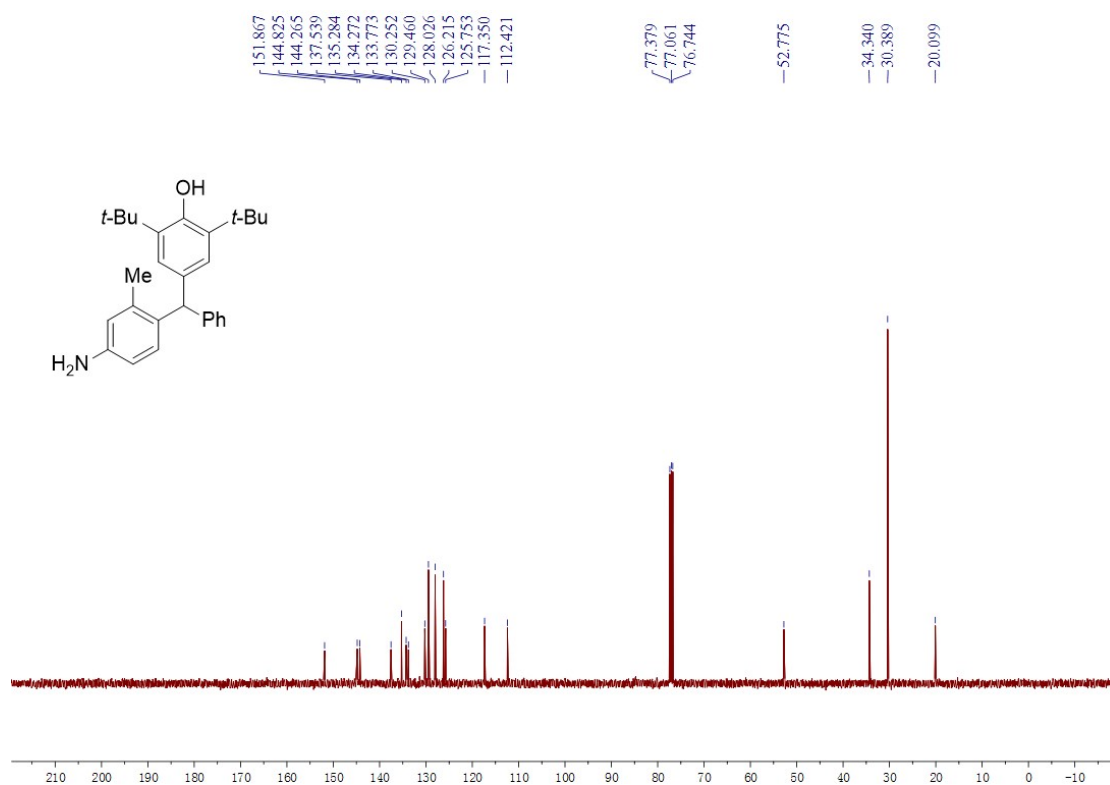

**4-((4-Amino-3-methoxyphenyl)(phenyl)methyl)-2,6-di-tert-butylphenol (3d)**

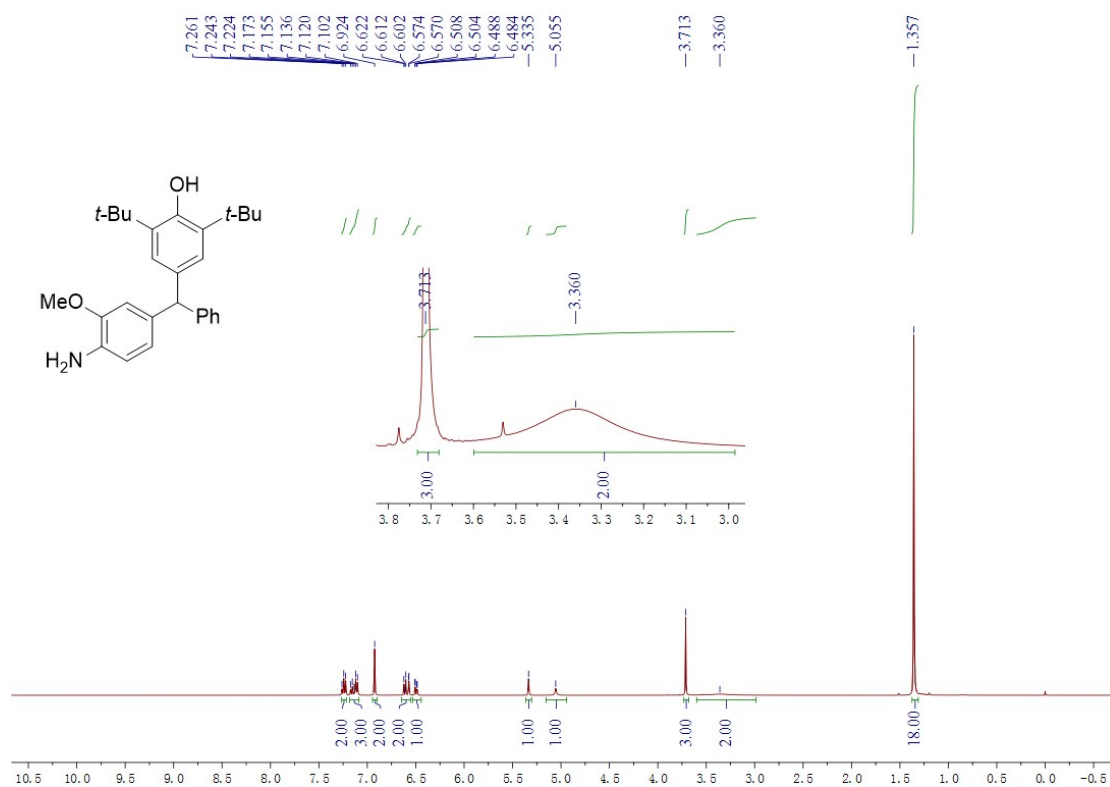

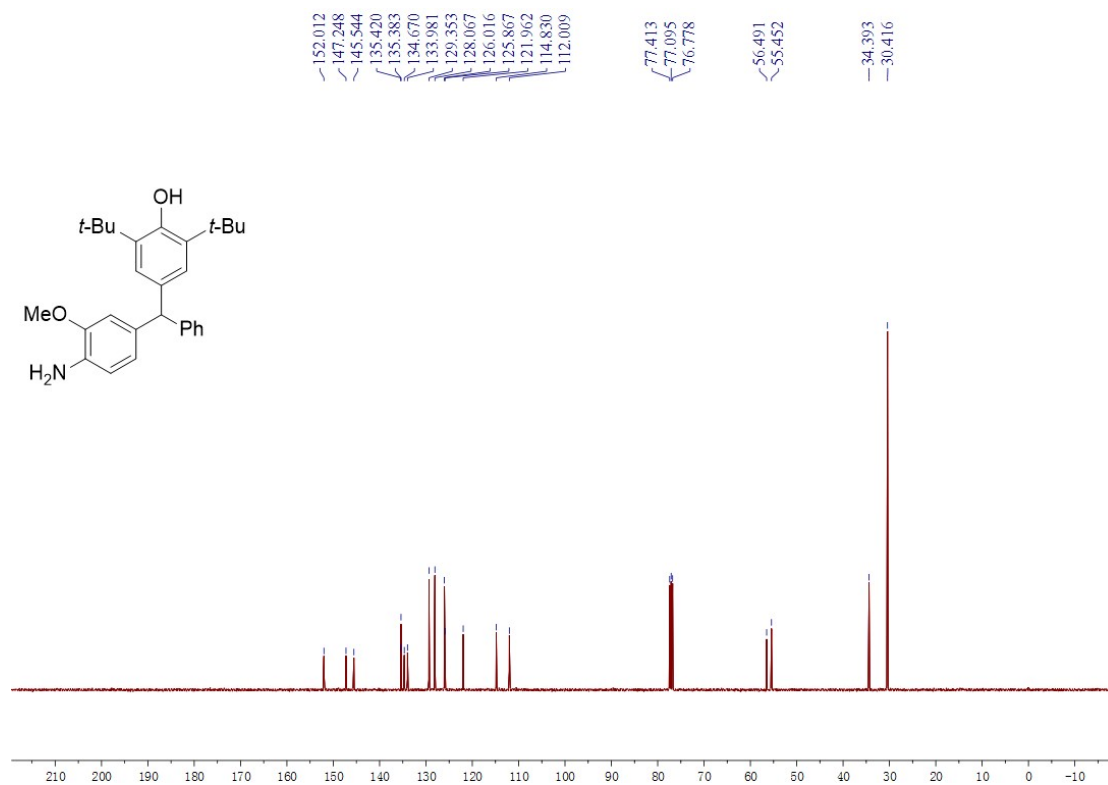

**4-((4-Amino-3-fluorophenyl)(phenyl)methyl)-2,6-di-tert-butylphenol (3e)**

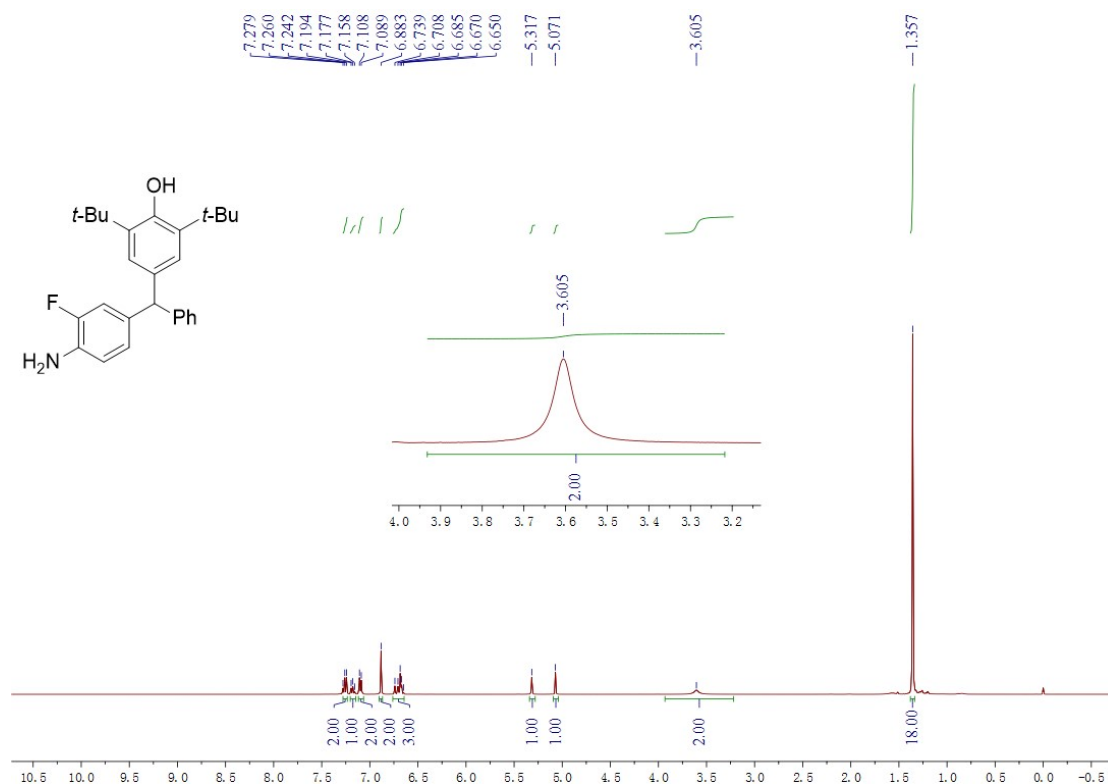



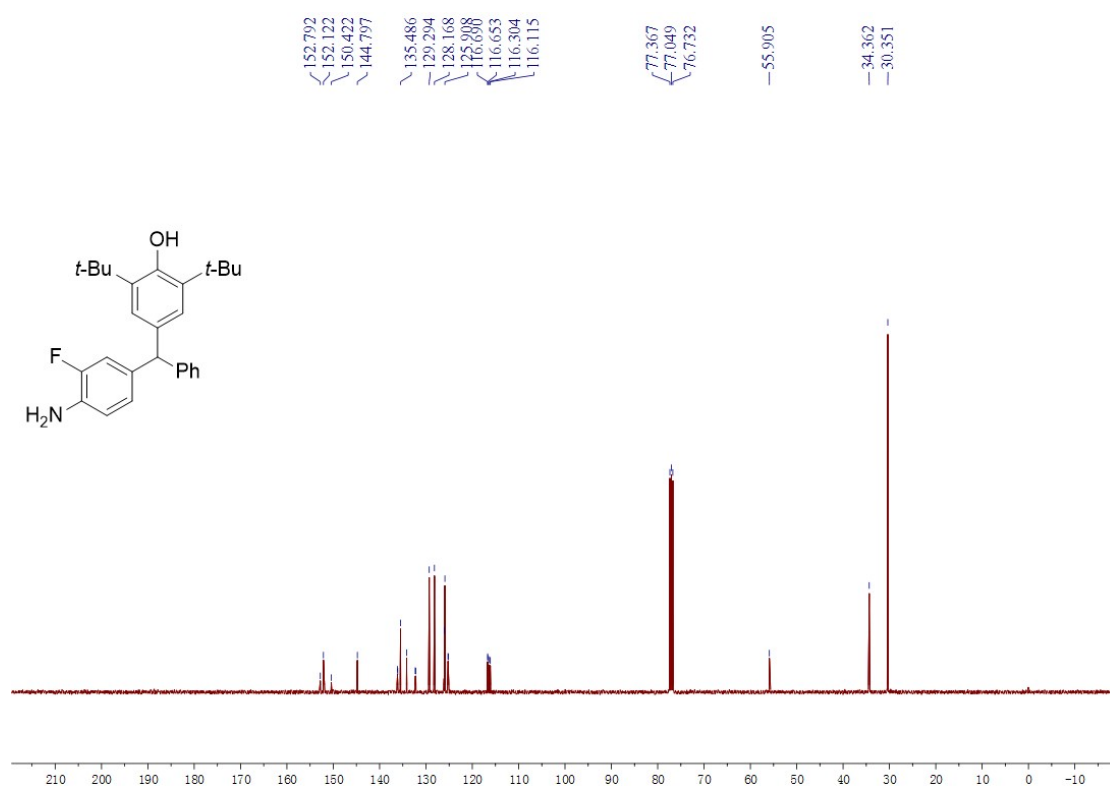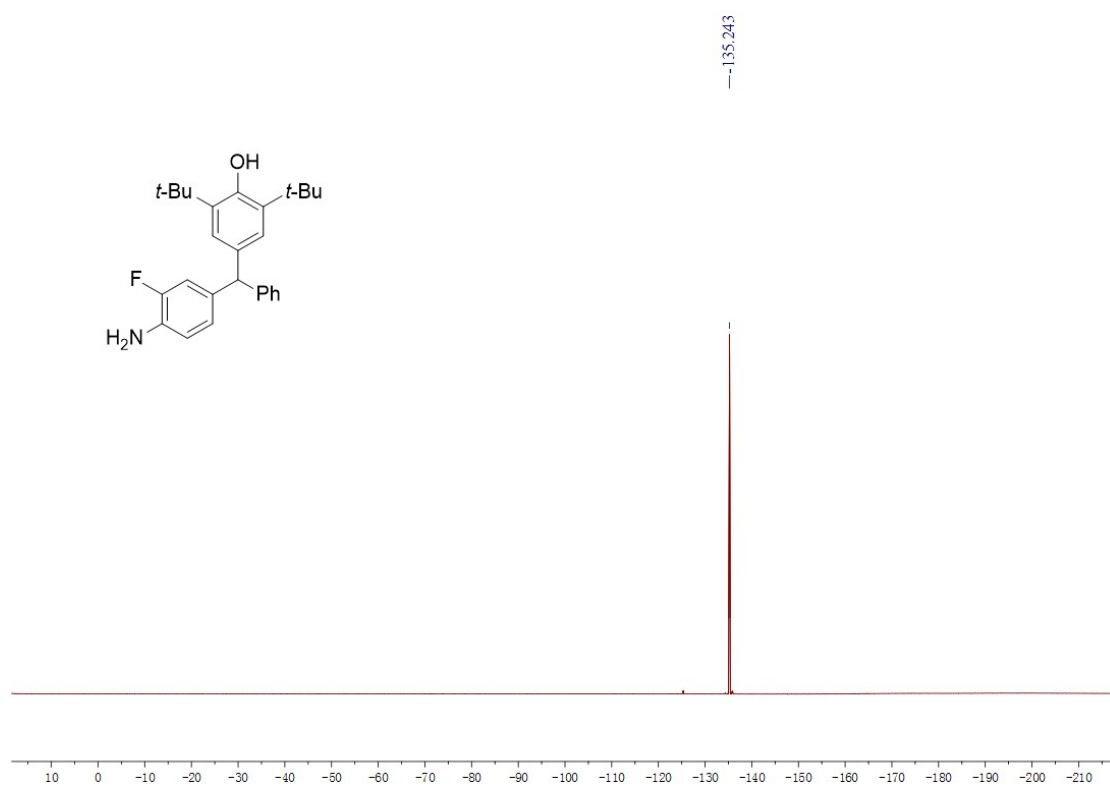

**4-((4-Amino-2-fluorophenyl)(phenyl)methyl)-2,6-di-tert-butylphenol (3f)**

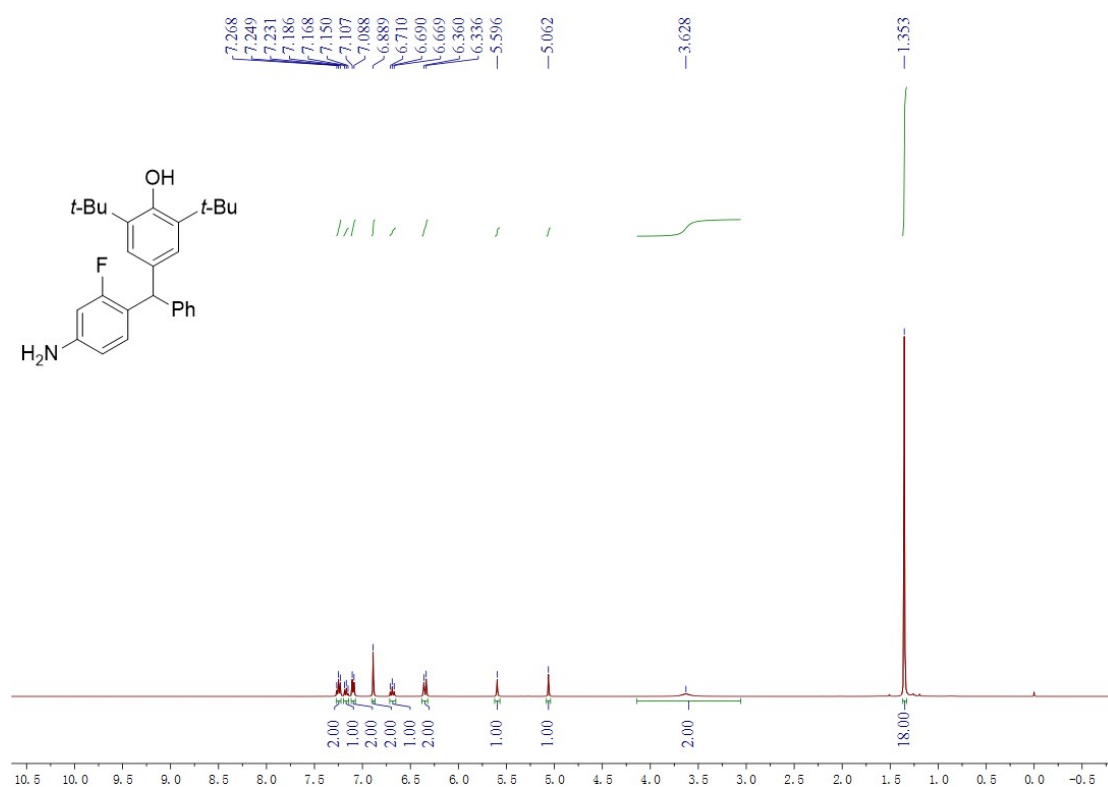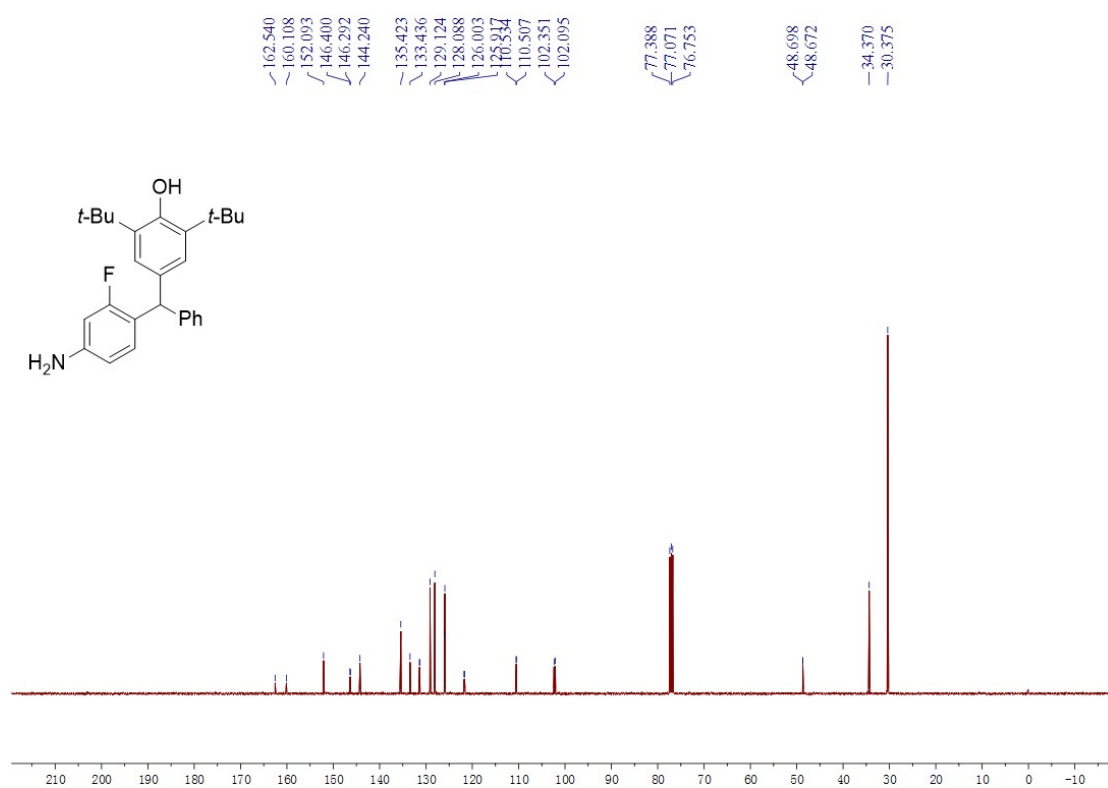

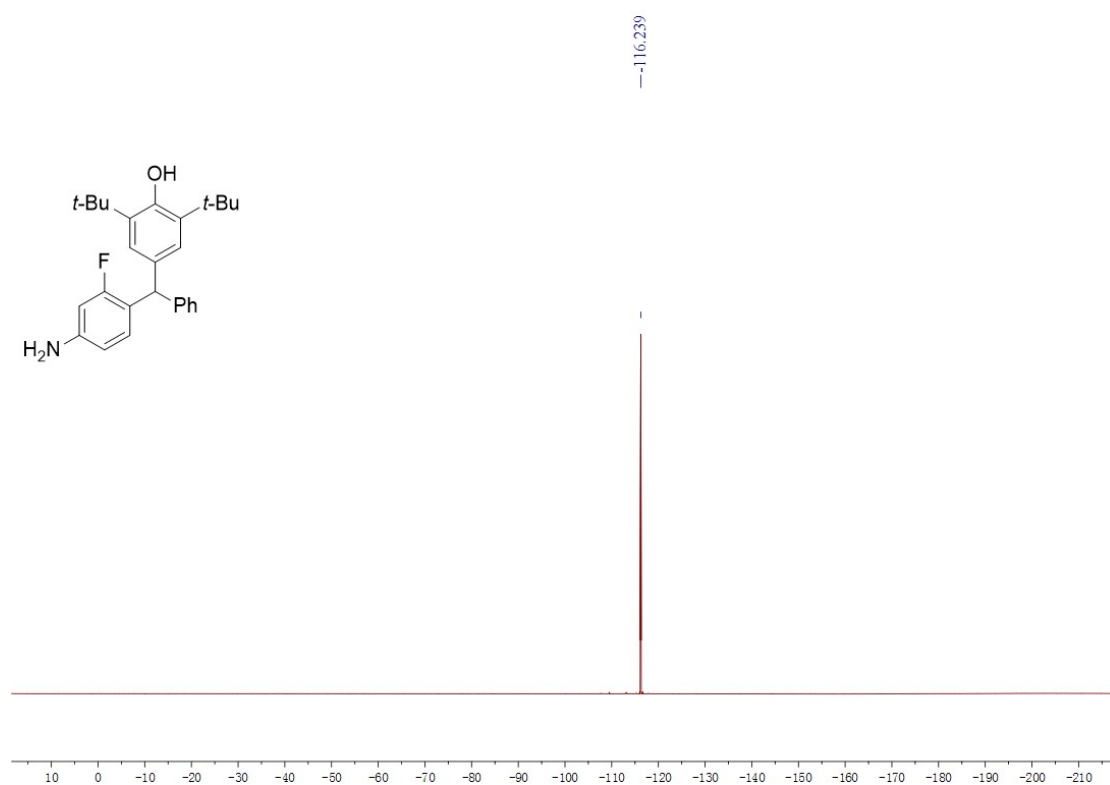

**4-((4-Amino-2-chlorophenyl)(phenyl)methyl)-2,6-di-tert-butylphenol (3g)**

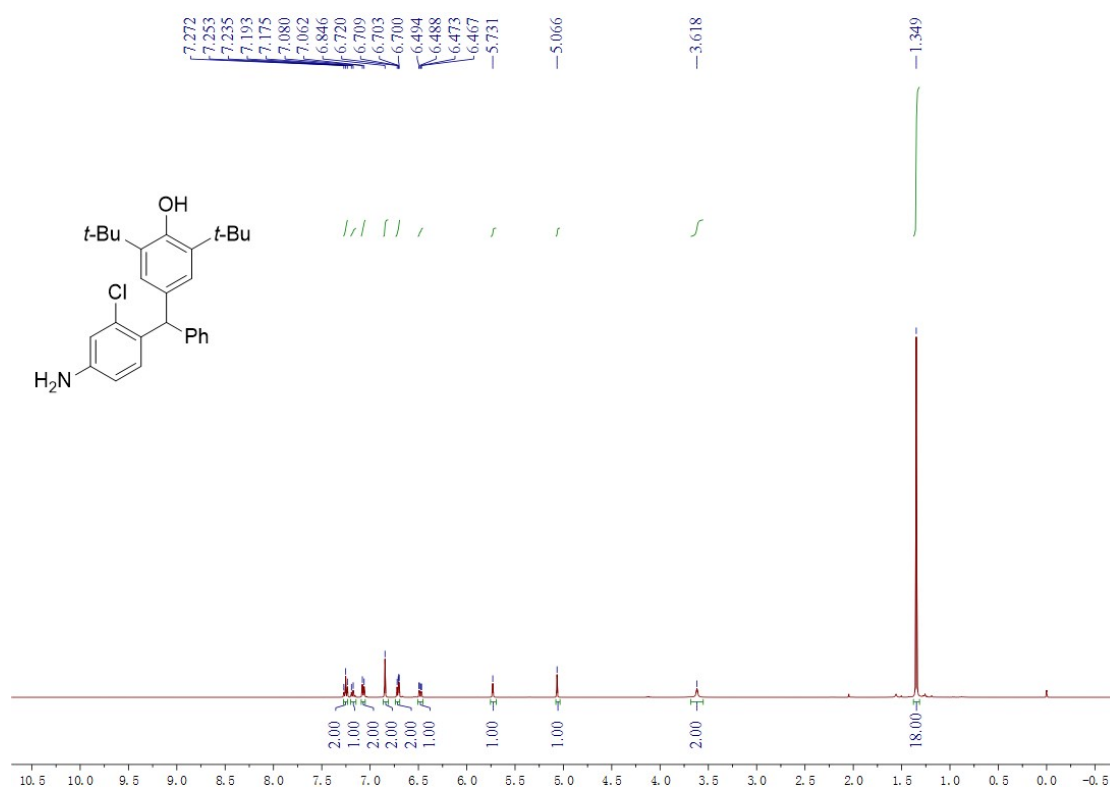

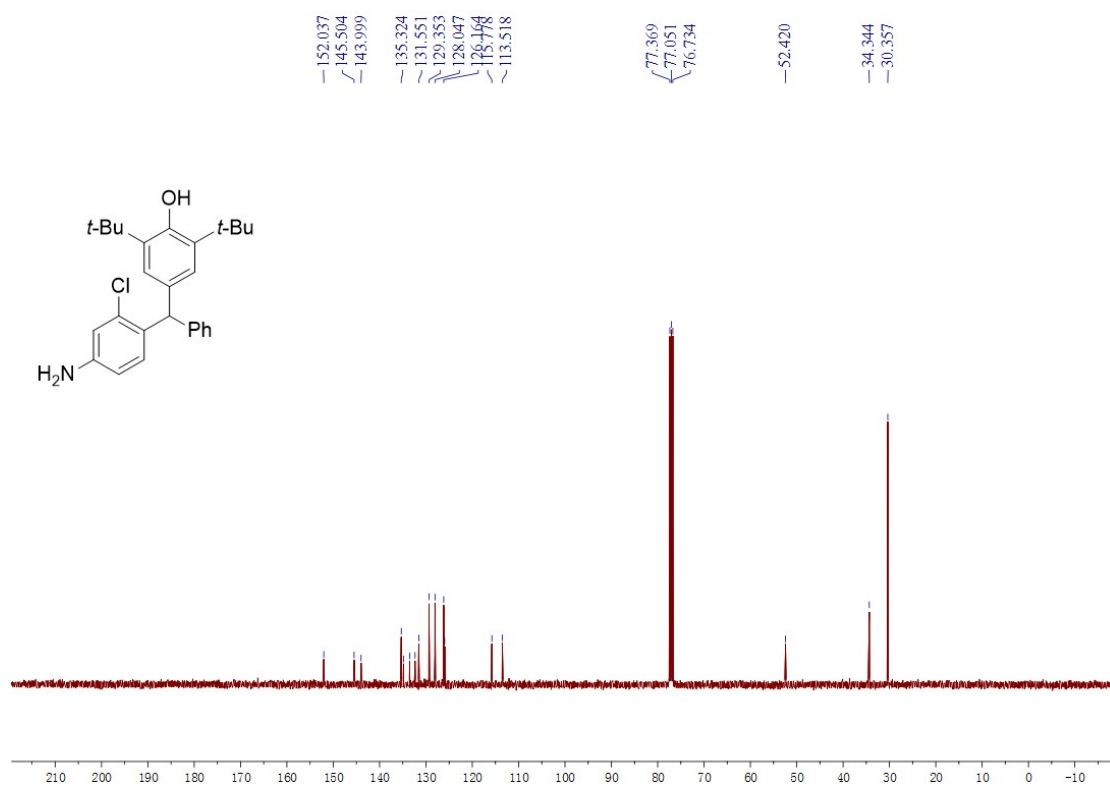

**4-((4-Amino-3-bromophenyl)(phenyl)methyl)-2,6-di-tert-butylphenol (3h)**

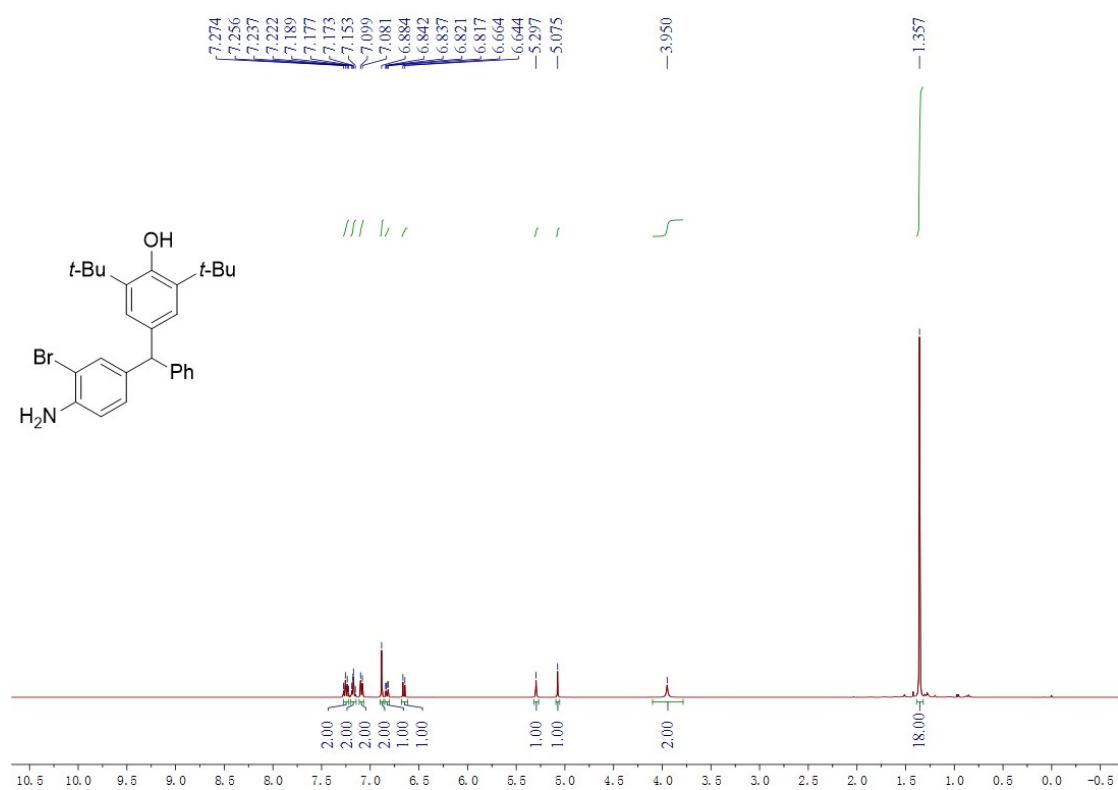

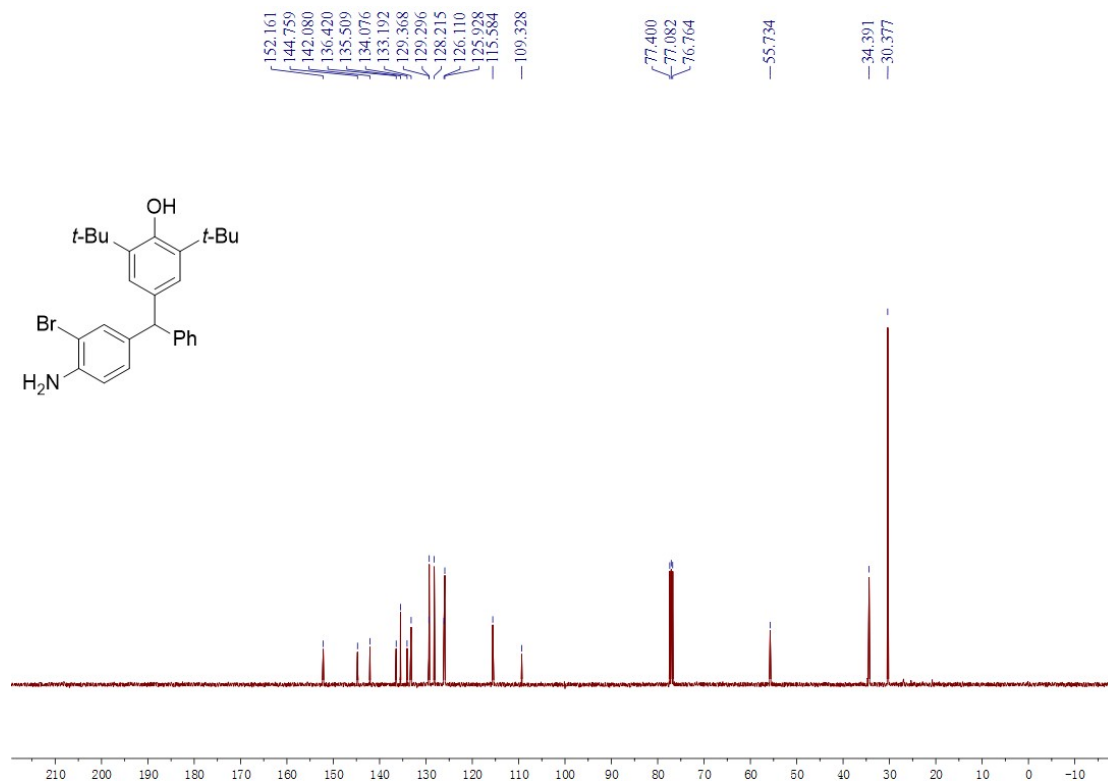

**4-((4-Amino-3-iodophenyl)(phenyl)methyl)-2,6-di-tert-butylphenol (3i)**

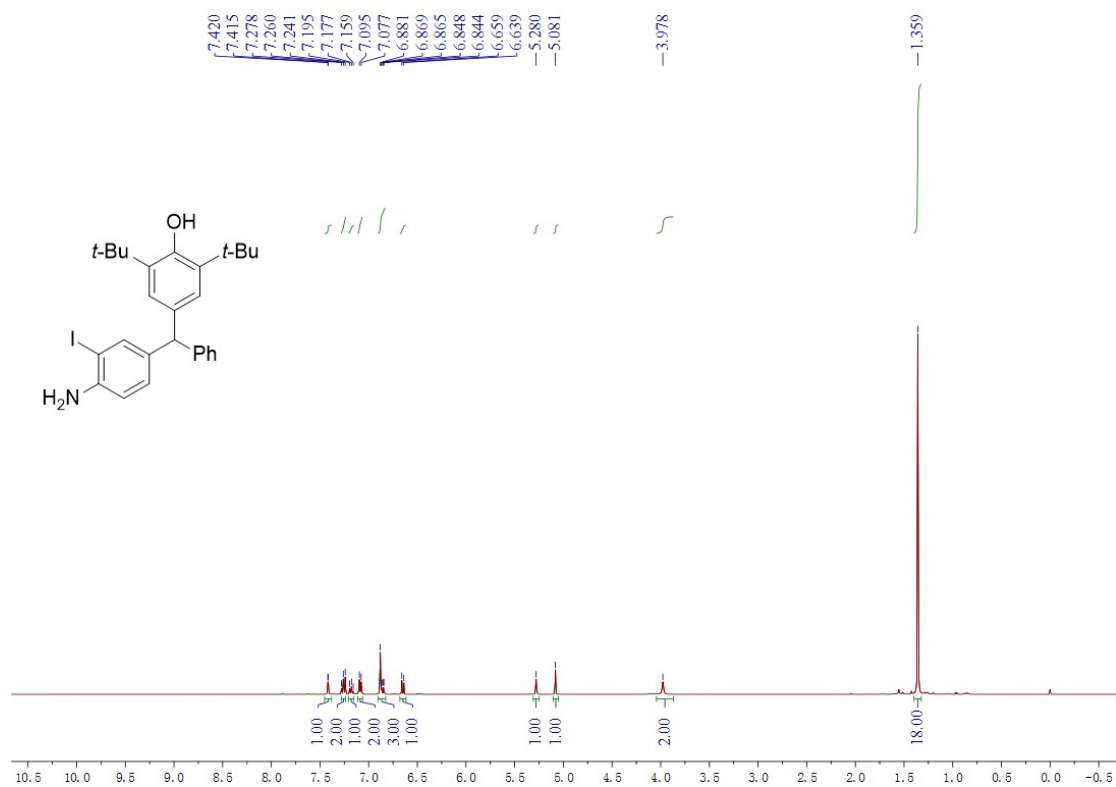

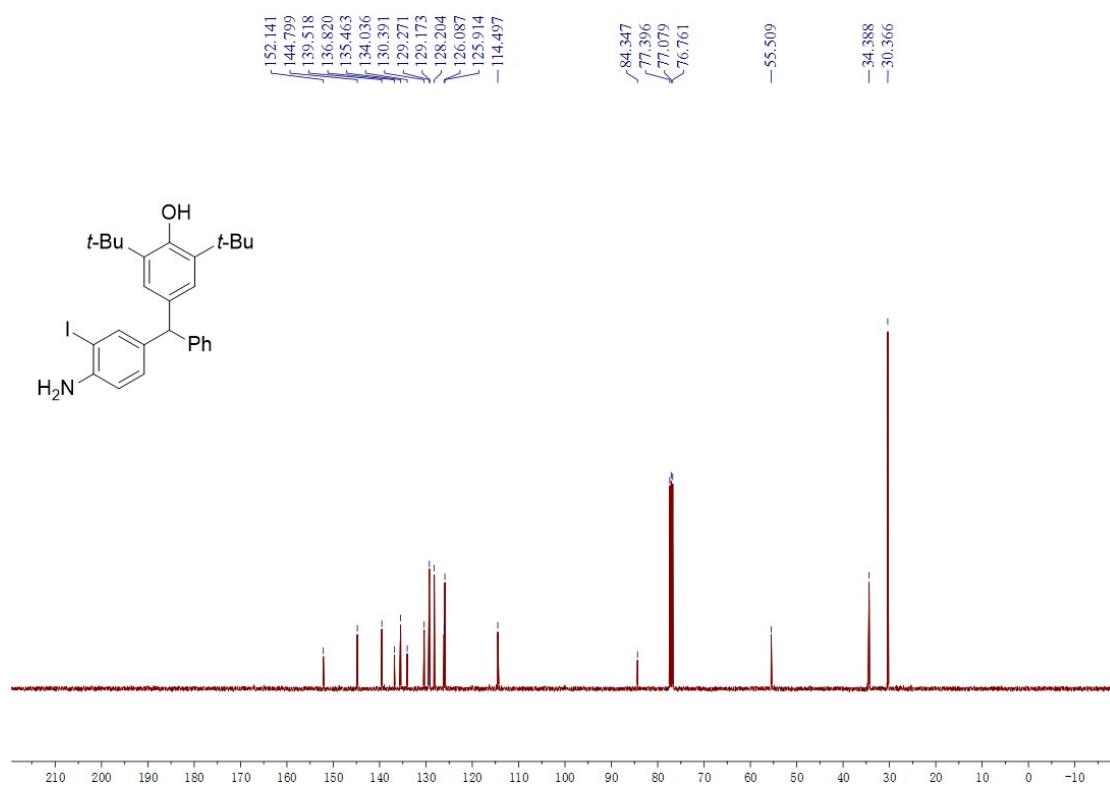

**4-((4-Amino-2-ethynylphenyl)(phenyl)methyl)-2,6-di-tert-butylphenol (3j)**

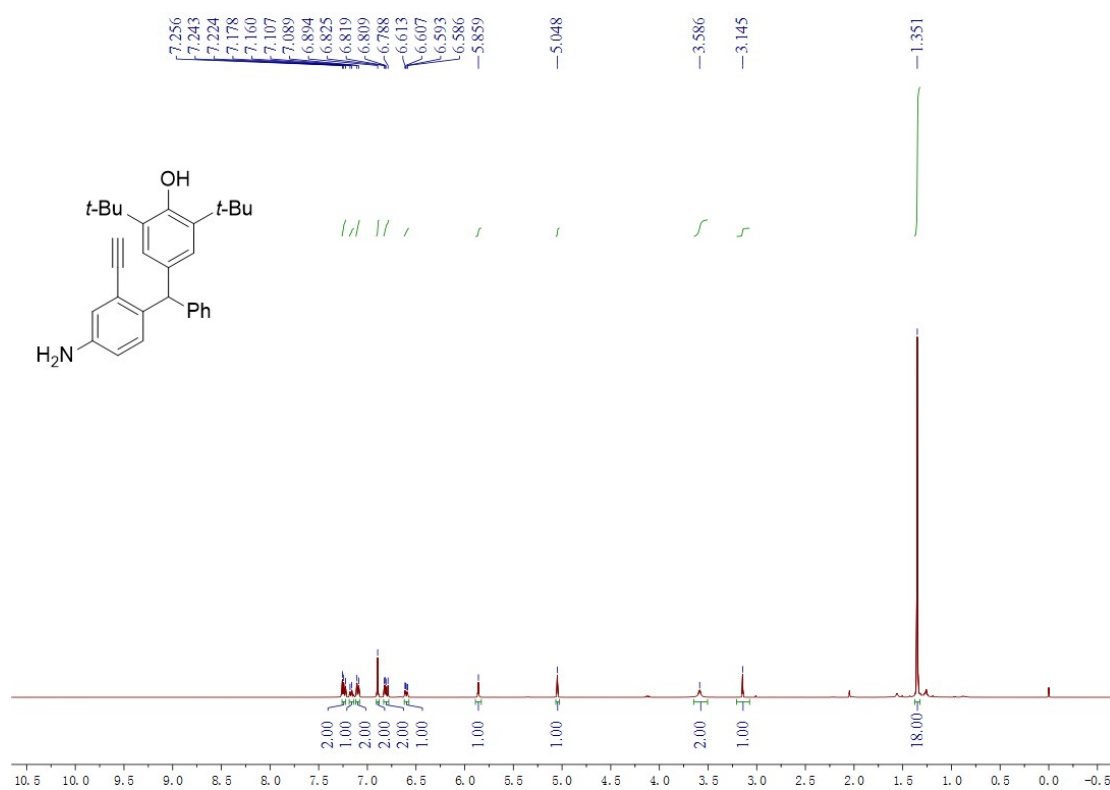

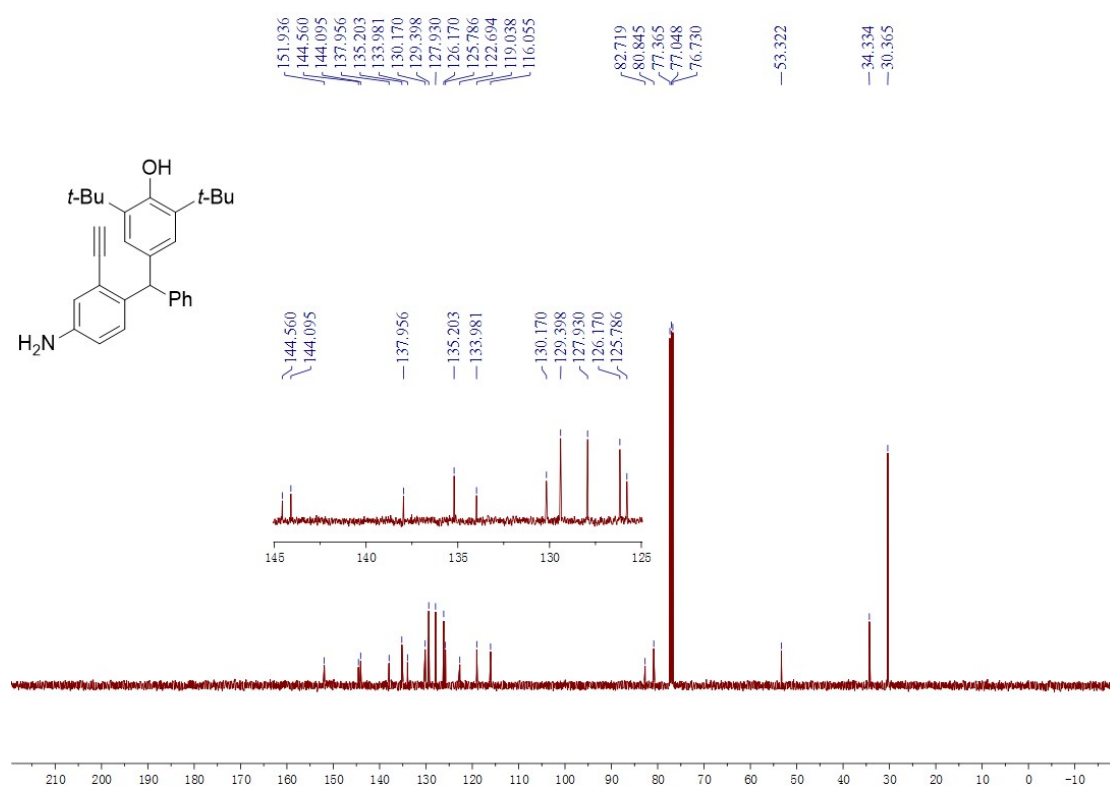

**4-((4-Amino-2,3-dimethylphenyl)(phenyl)methyl)-2,6-di-tert-butylphenol (3k)**

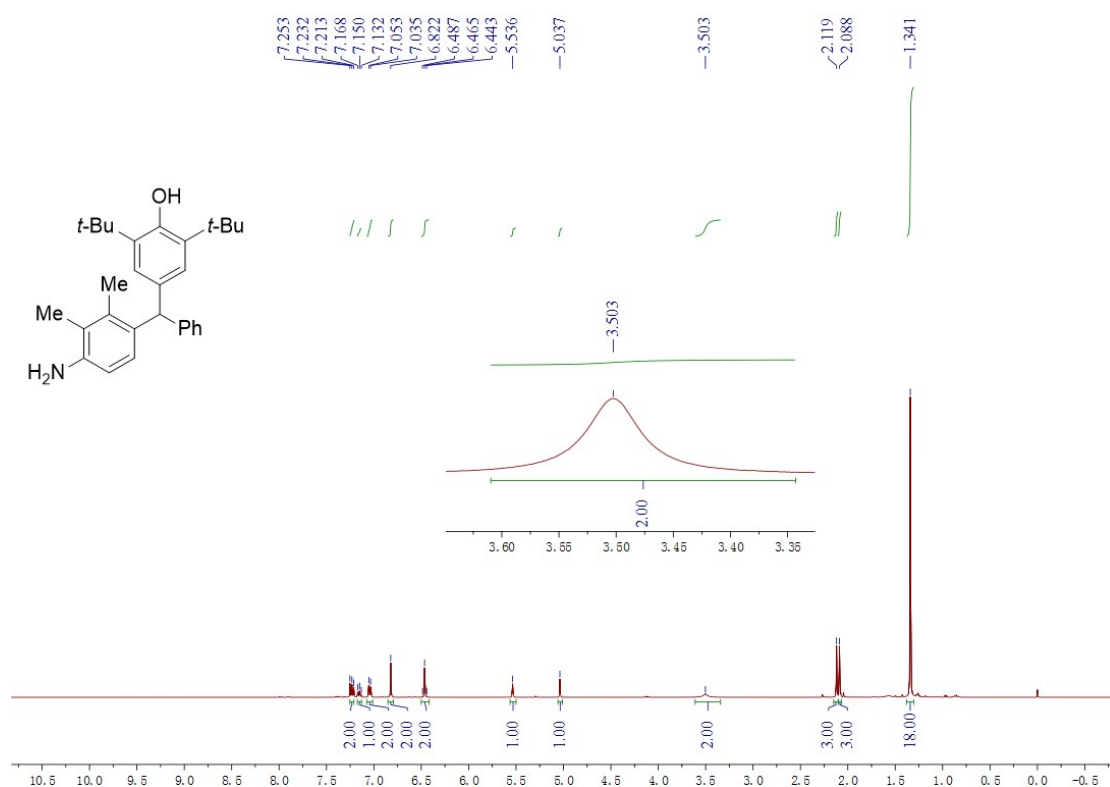

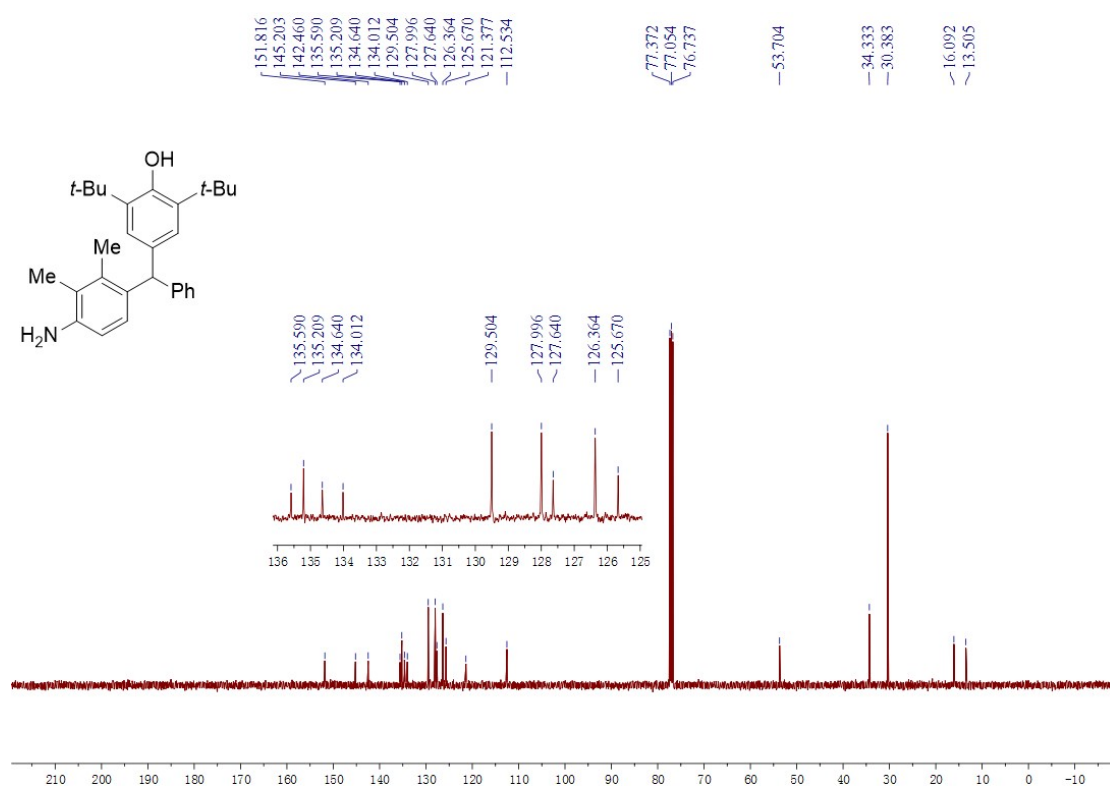

**4-((4-Amino-2,6-dimethylphenyl)(phenyl)methyl)-2,6-di-tert-butylphenol (3l)**

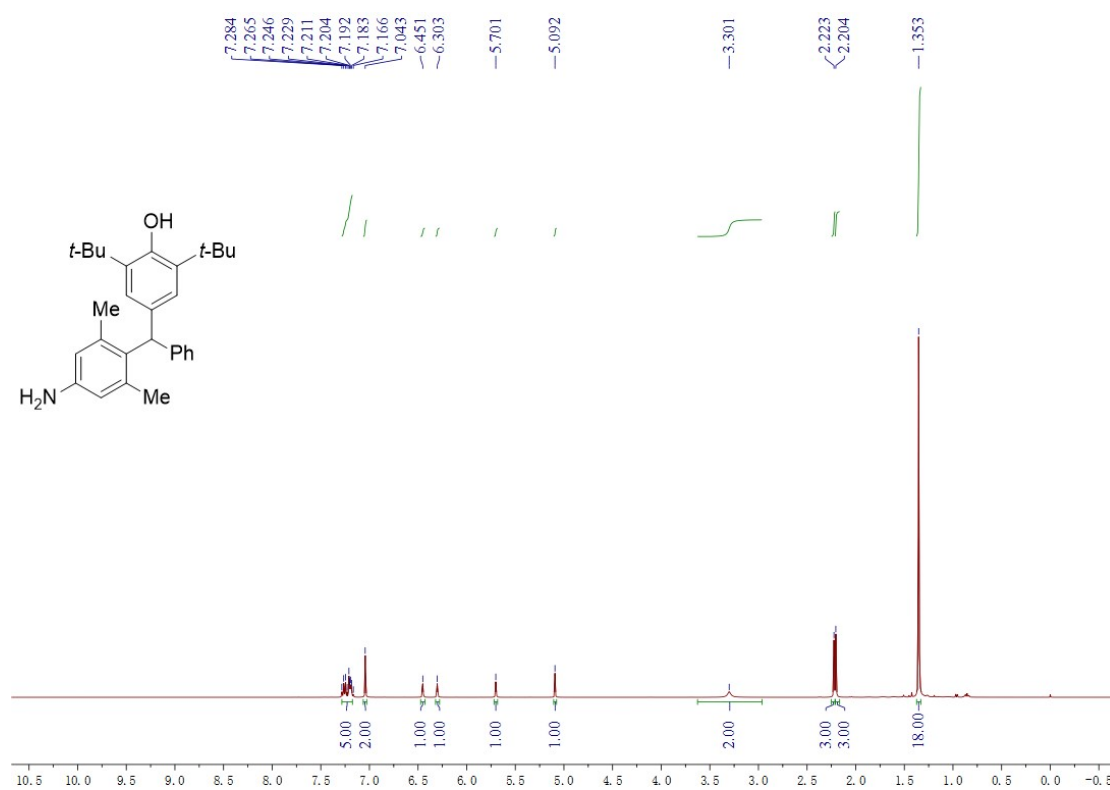



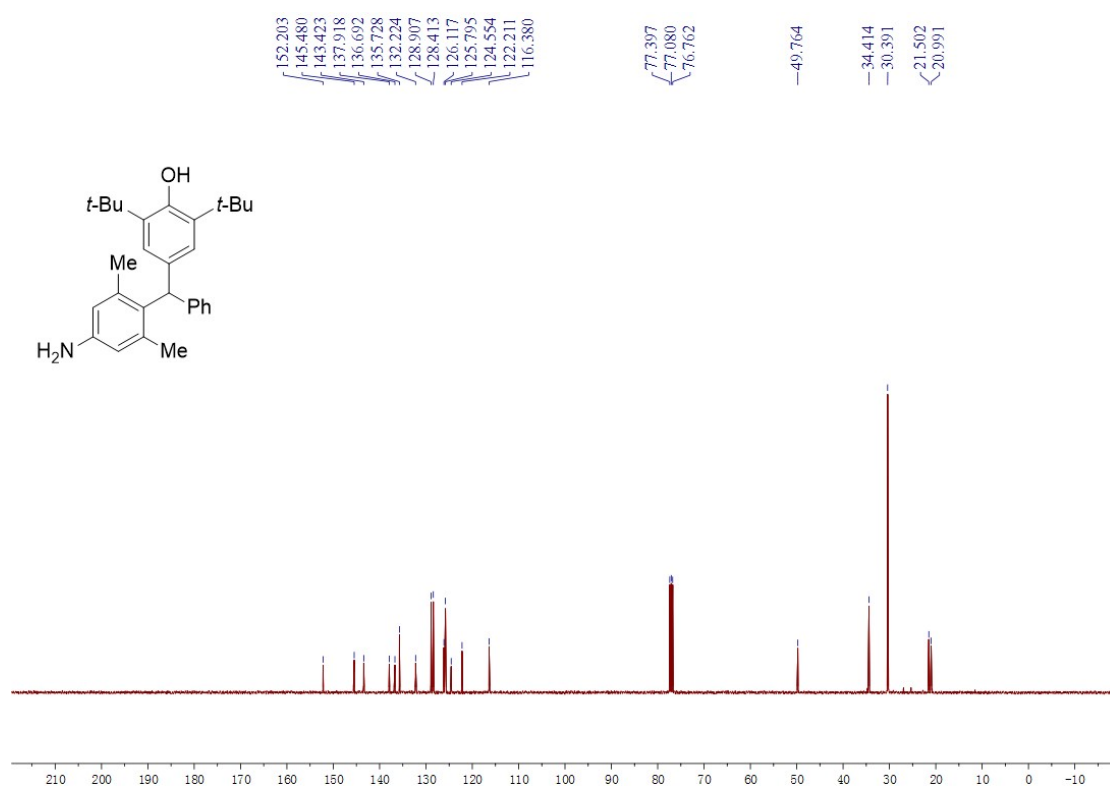

**4-((4-Amino-5-iodo-2-methylphenyl)(phenyl)methyl)-2,6-di-tert-butylphenol (3m)**

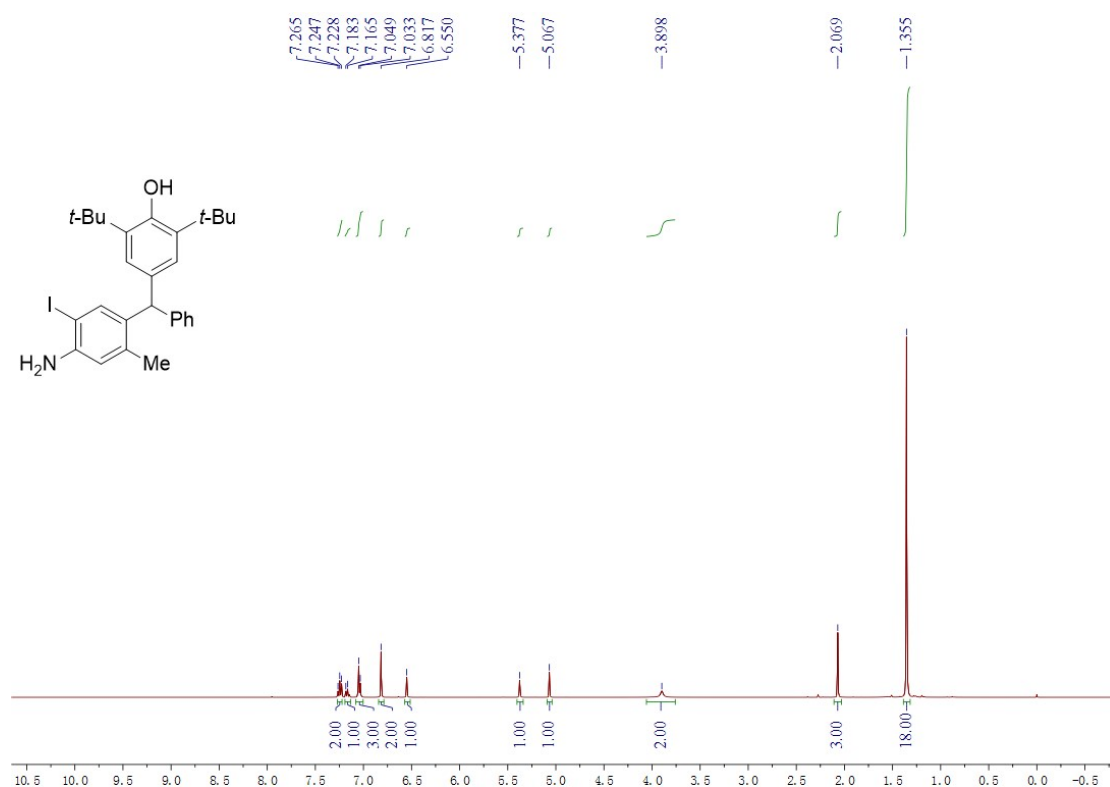

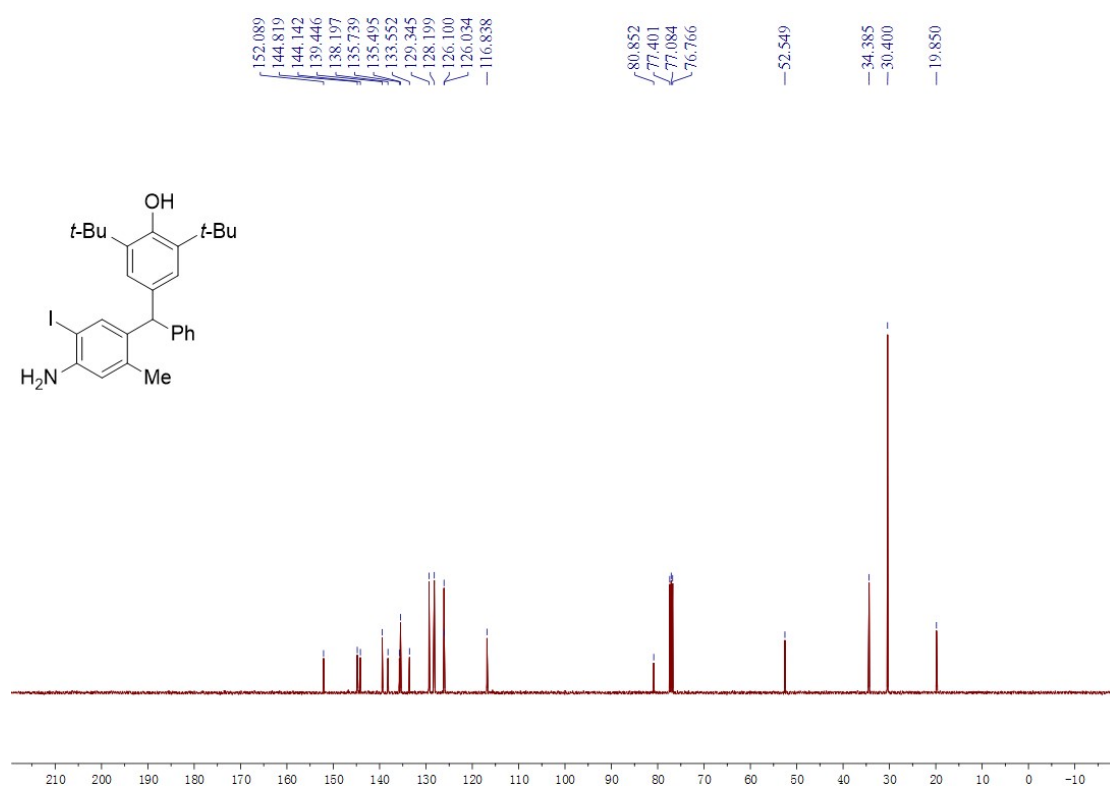

**2,6-Di-tert-butyl-4-((4-(dimethylamino)phenyl)(phenyl)methyl)phenol (3n)**

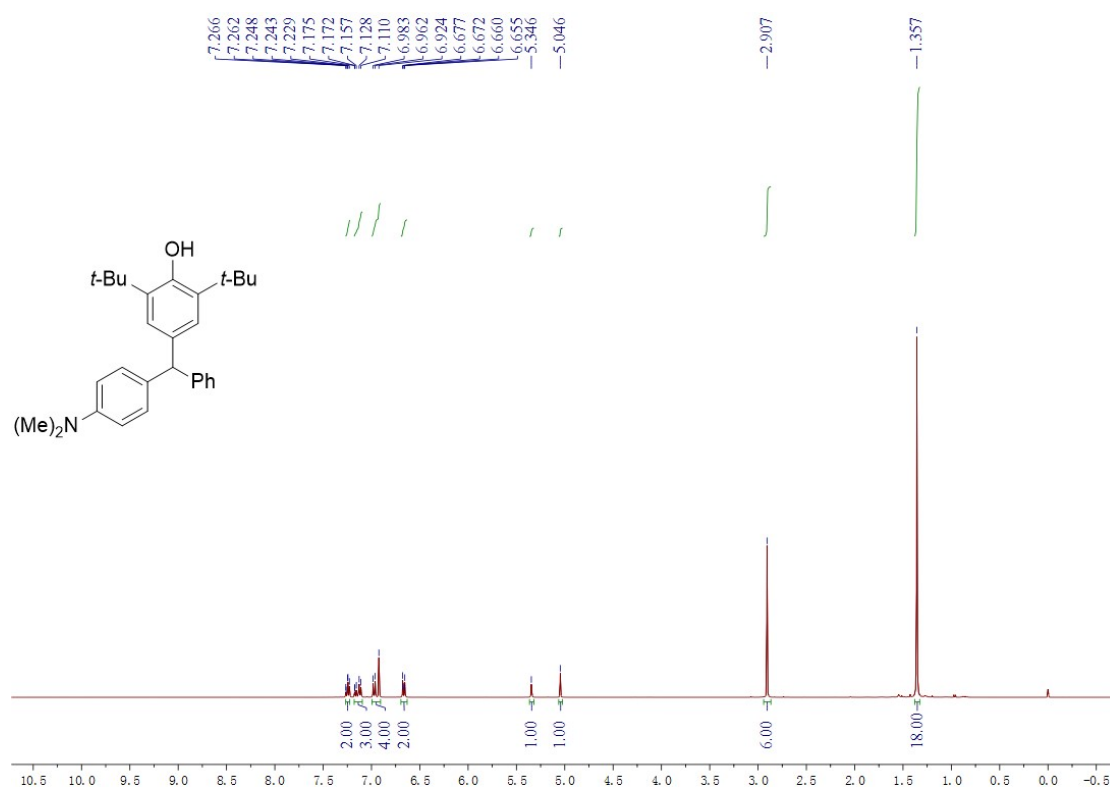

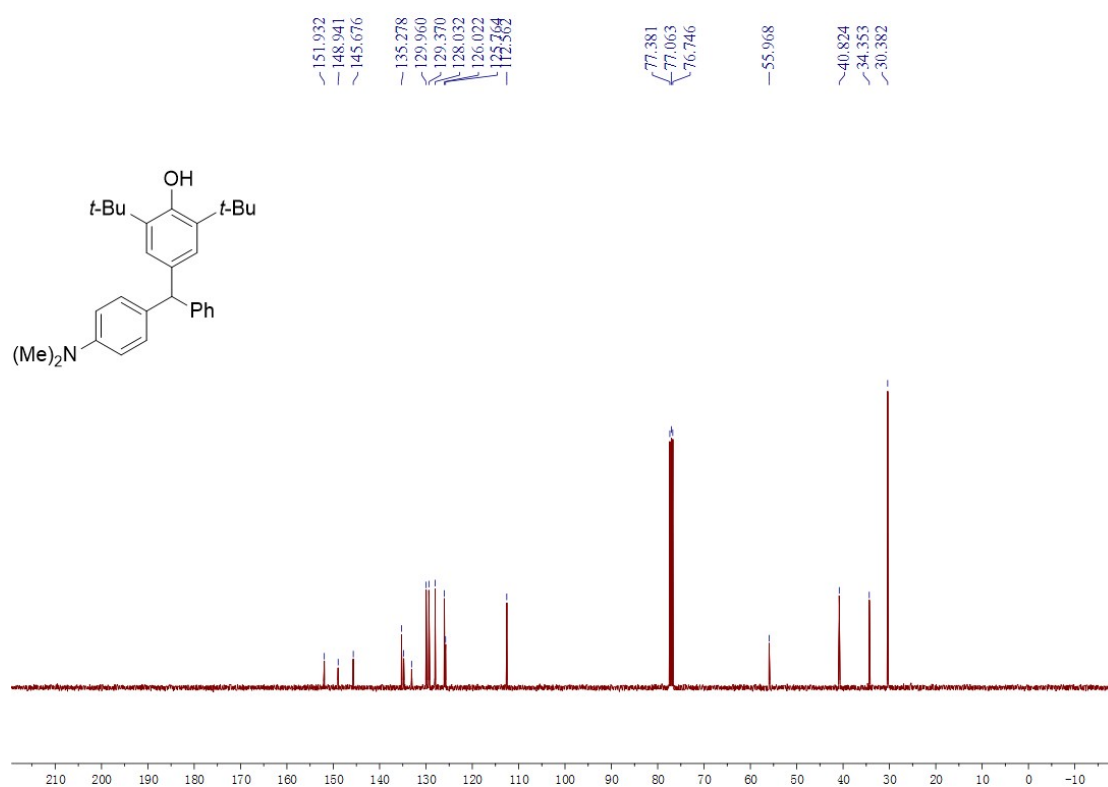

**2,6-Di-tert-butyl-4-((4-(dibenzylamino)phenyl)(phenyl)methyl)phenol (3o)**

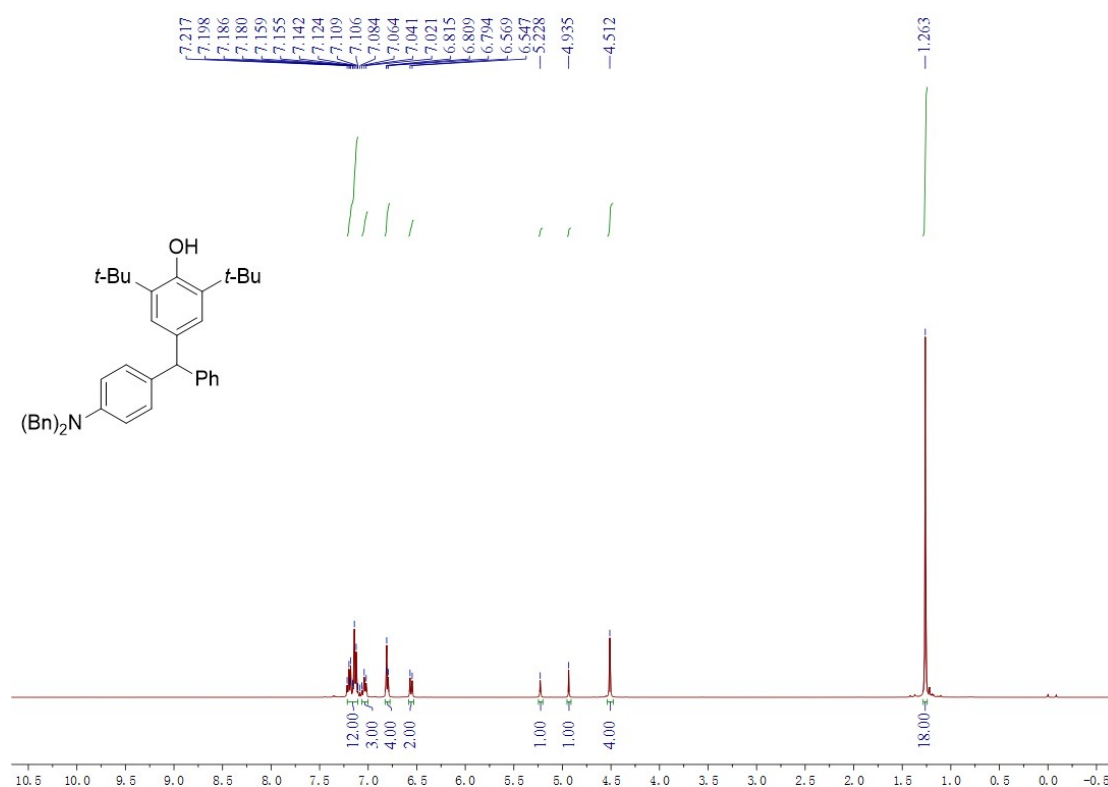

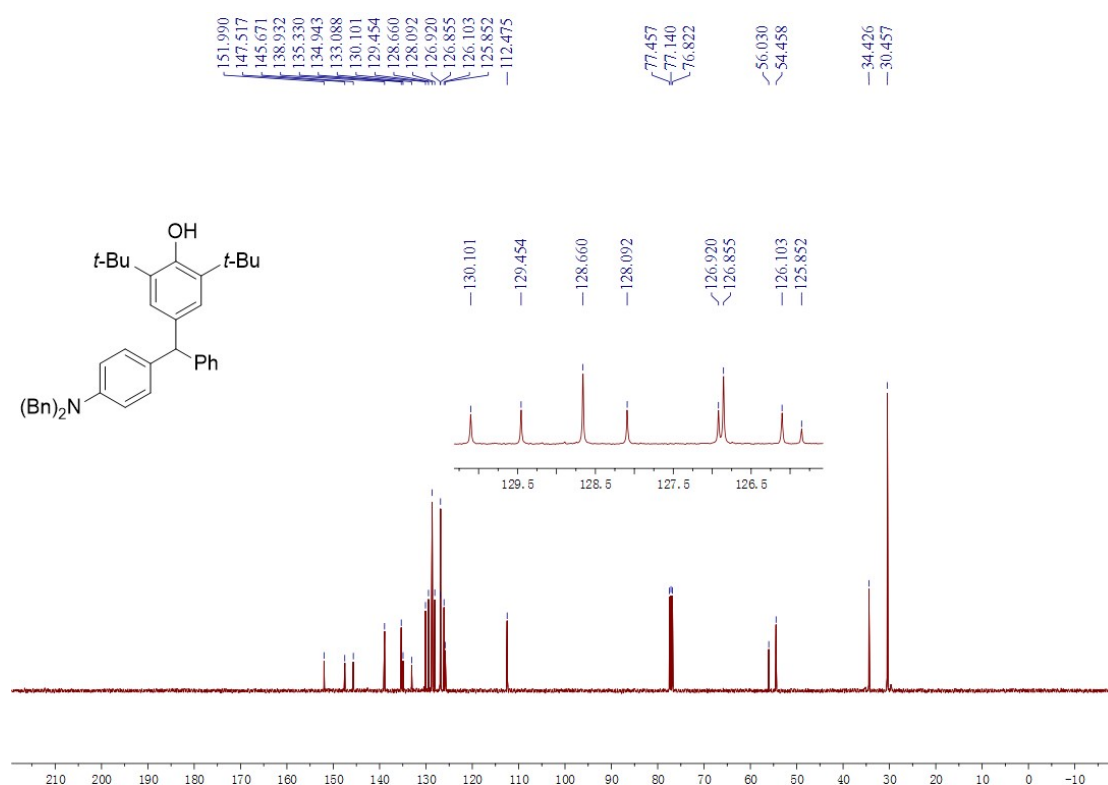

**2,6-Di-tert-butyl-4-((4-(diethylamino)-2-methylphenyl)(phenyl)methyl)phenol (3p)**

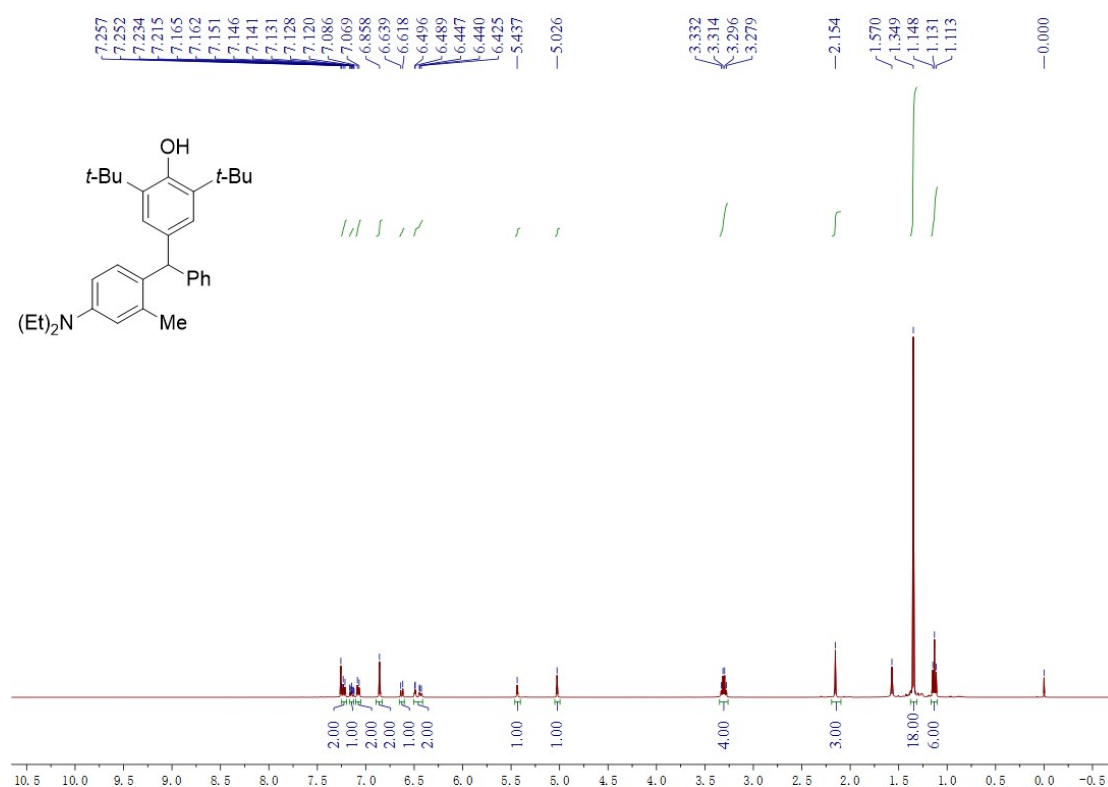

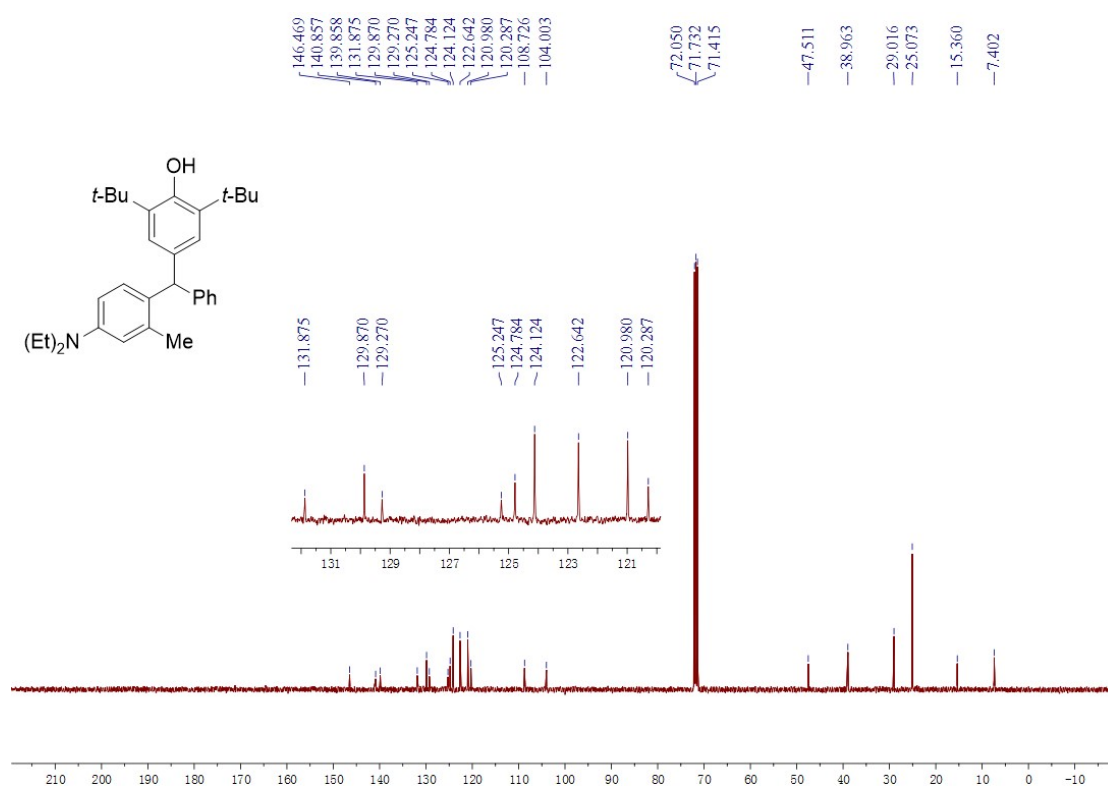

**2,6-Di-tert-butyl-4-((4-(dimethylamino)-2-methoxyphenyl)(phenyl)methyl)phenol (3q)**

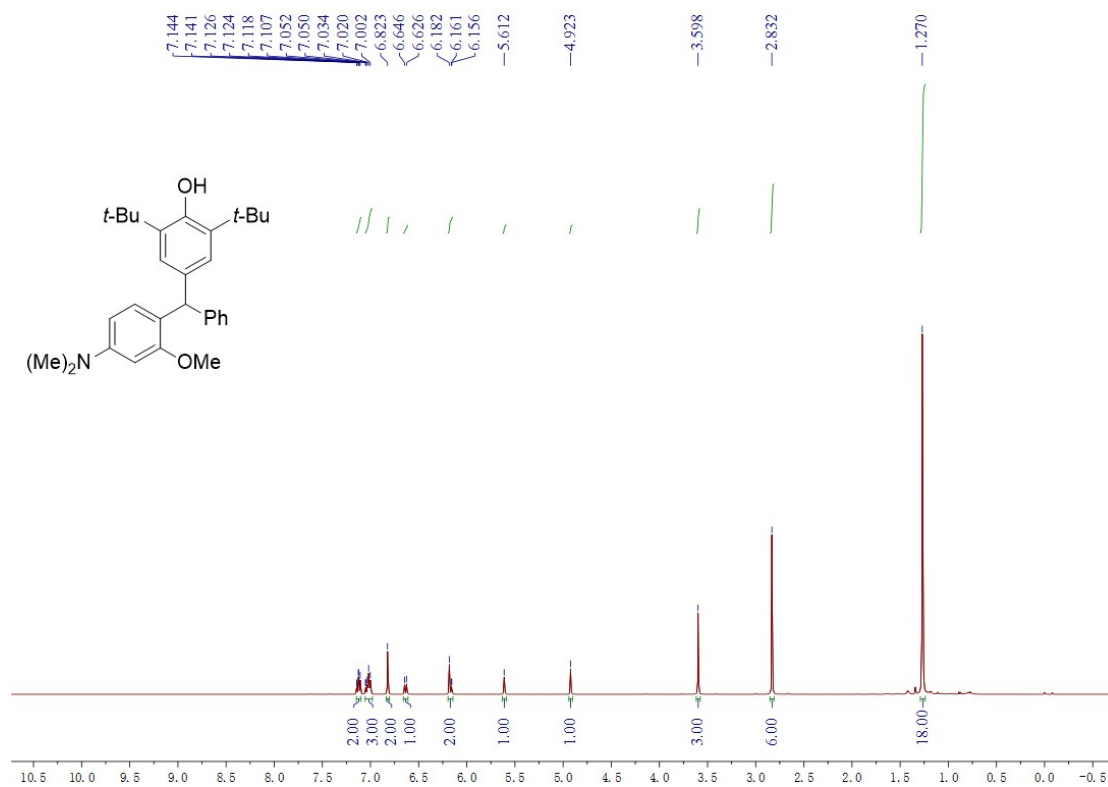

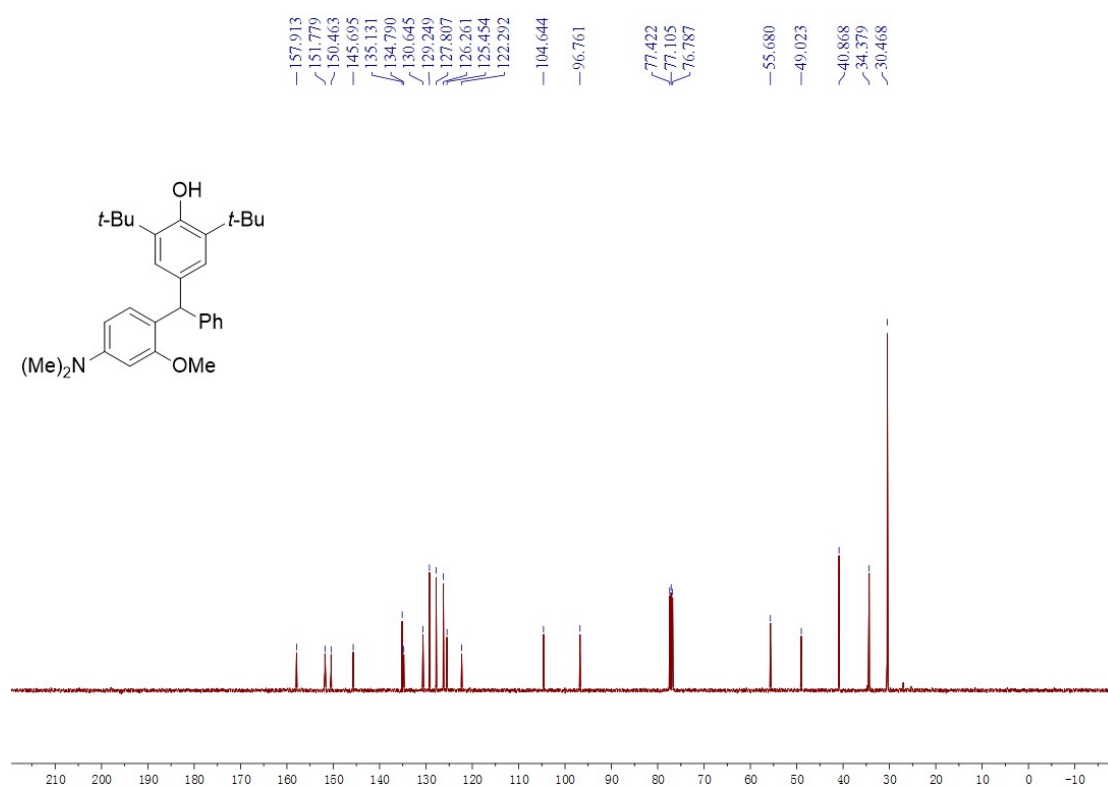

**2,6-Di-tert-butyl-4-((4-(methylamino)phenyl)(phenyl)methyl)phenol (3r)**

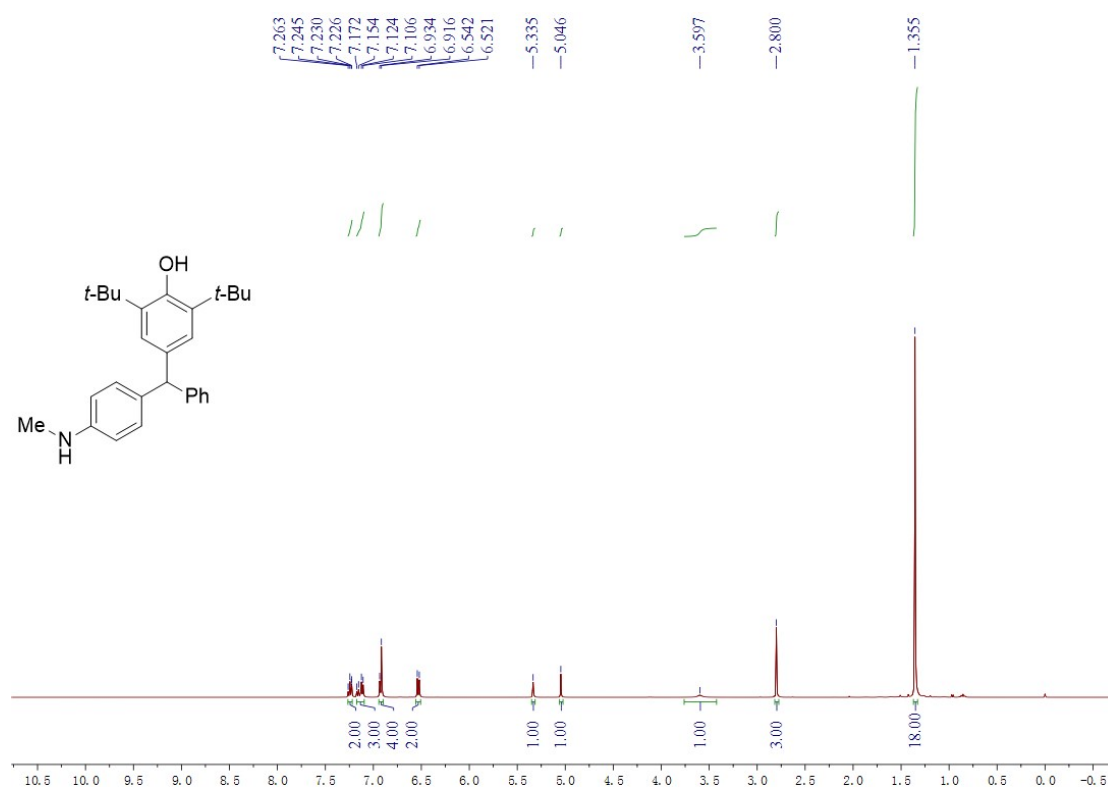

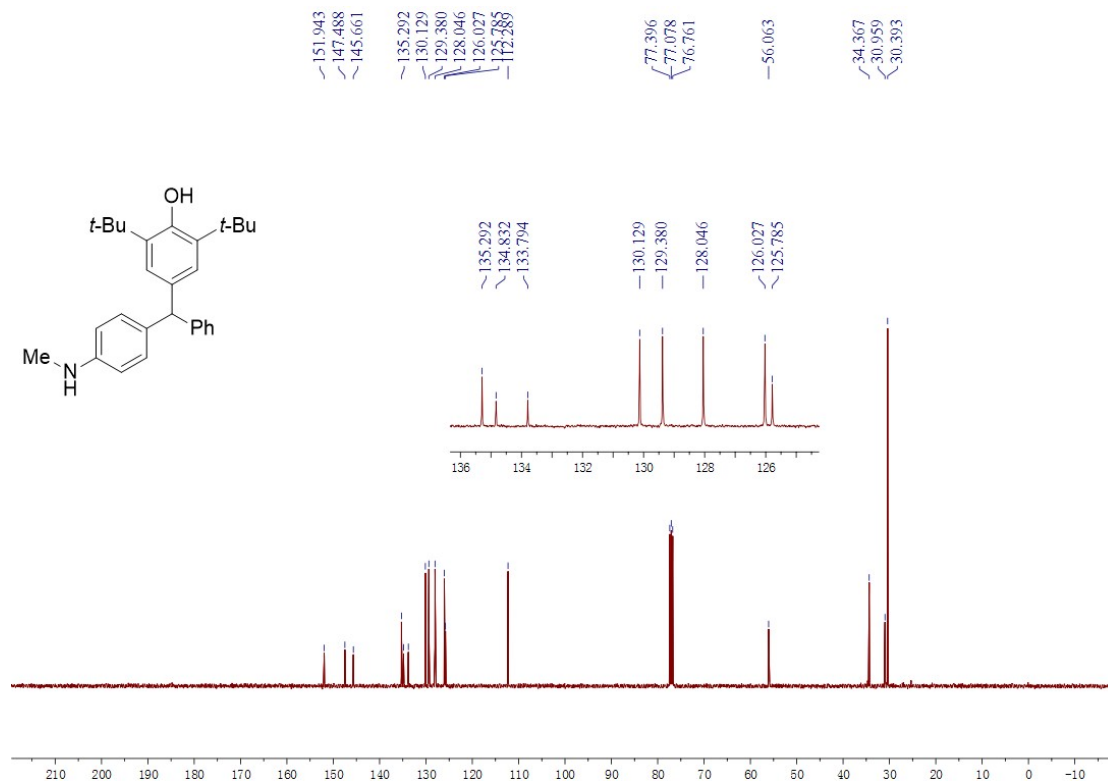

**2,6-Di-*tert*-butyl-4-((4-(ethylamino)phenyl)(phenyl)methyl)phenol (3s)**

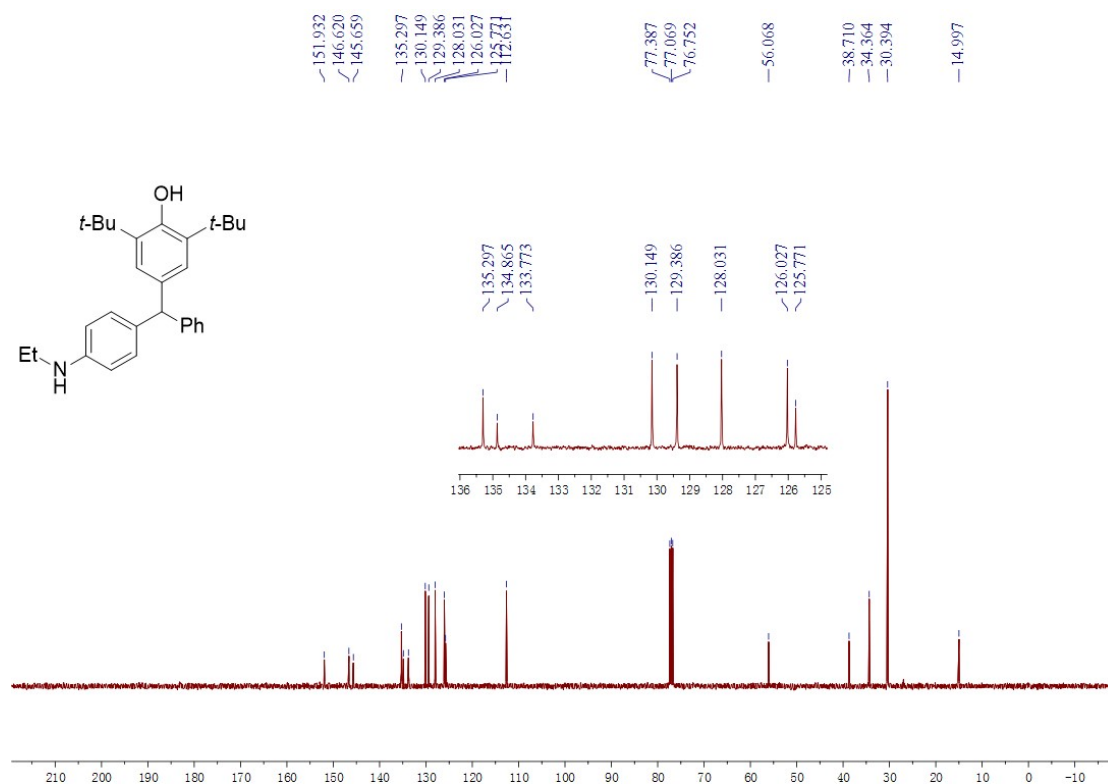

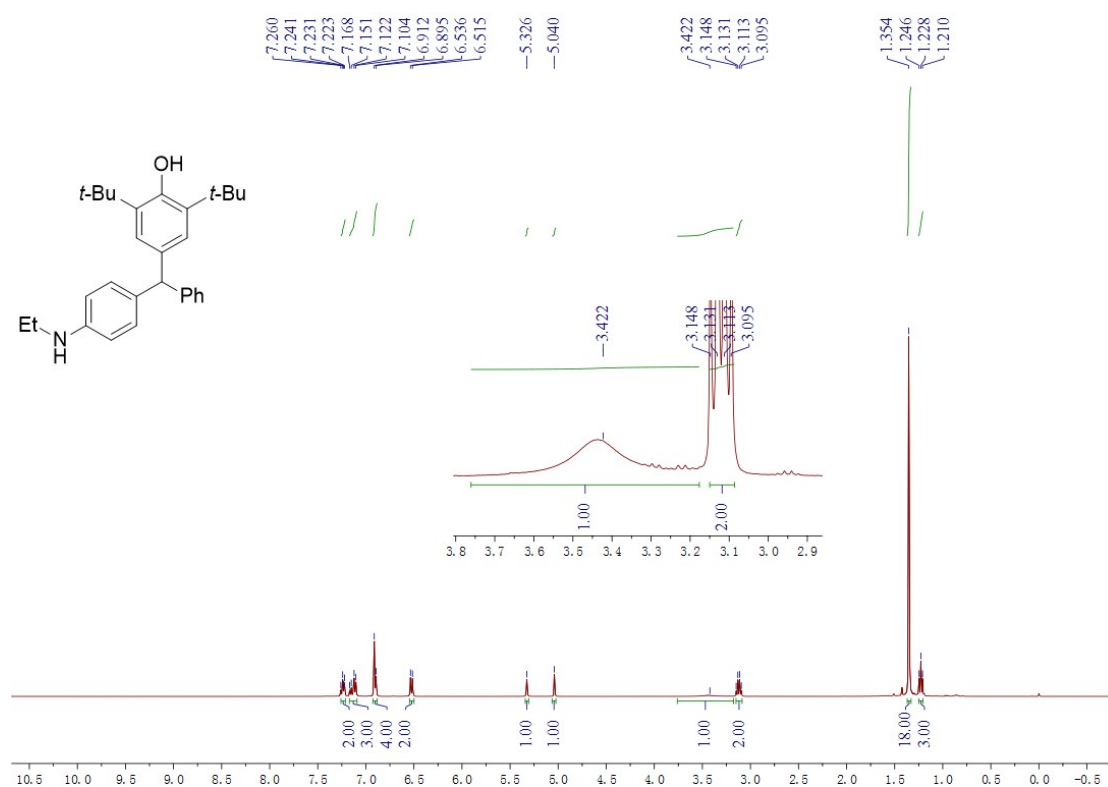

**2,6-Di-tert-butyl-4-((4-(naphthalen-2-ylamino)phenyl)(phenyl)methyl)phenol (3t)**

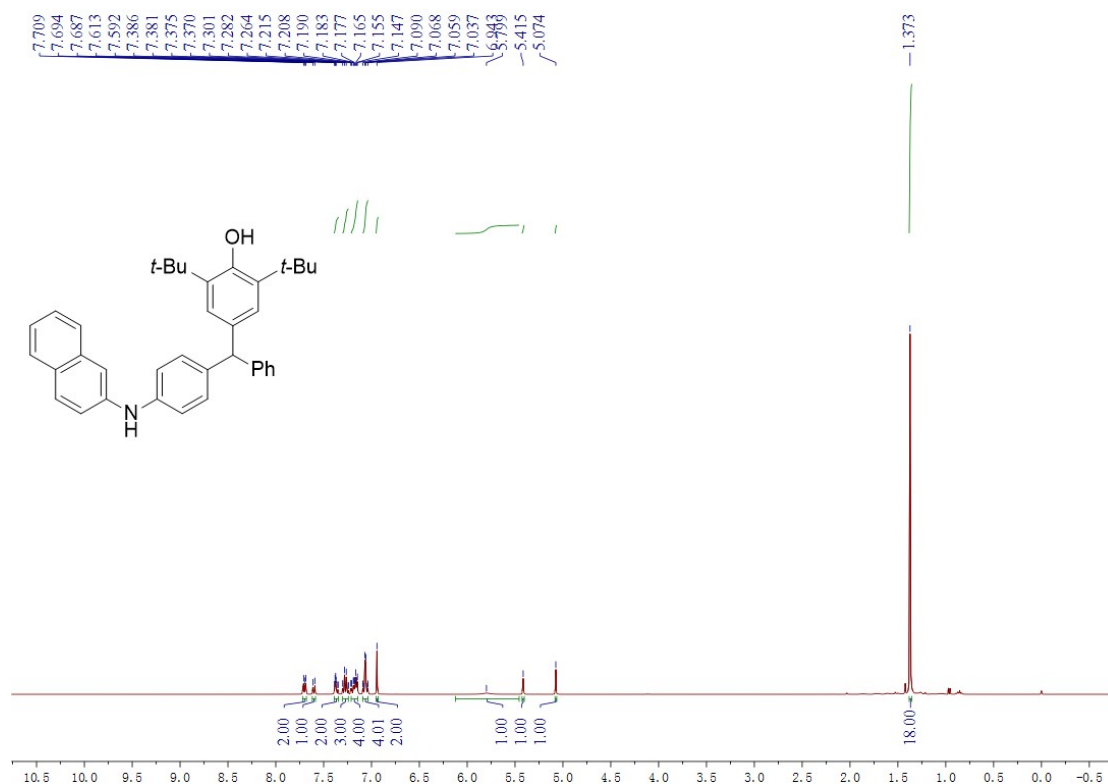



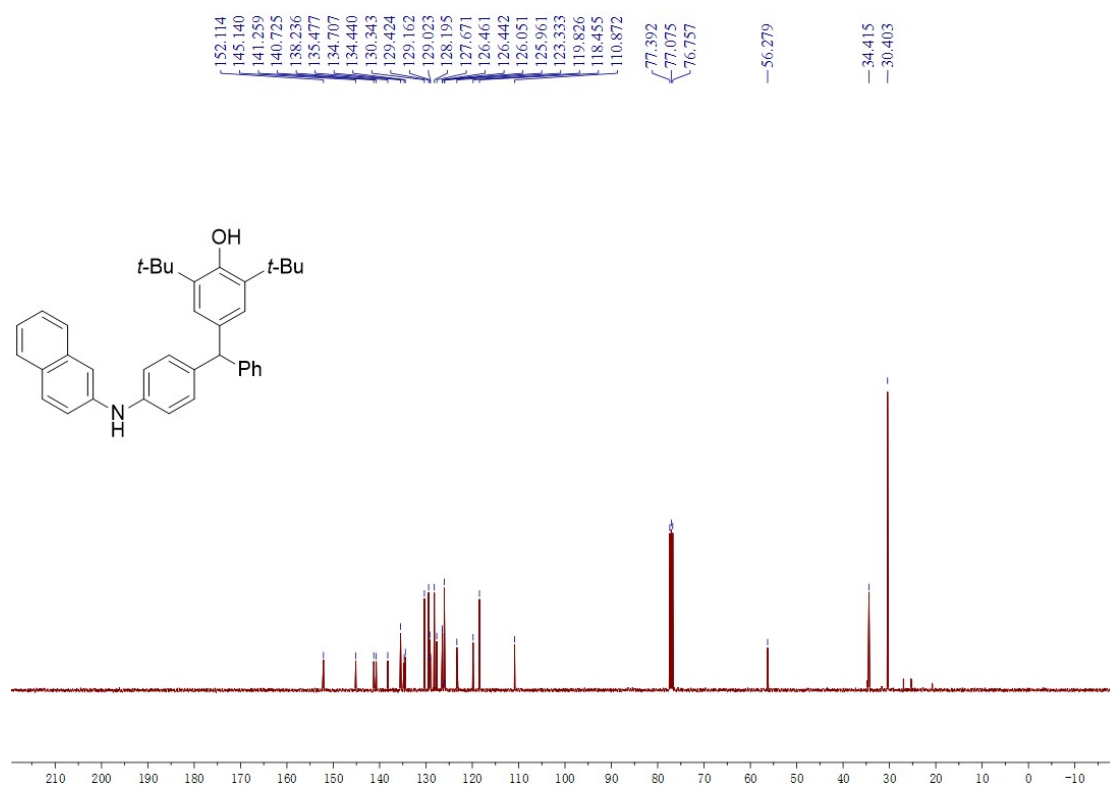

**2,6-Di-tert-butyl-4-((4-(diphenylamino)phenyl)(phenyl)methyl)phenol (3u)**

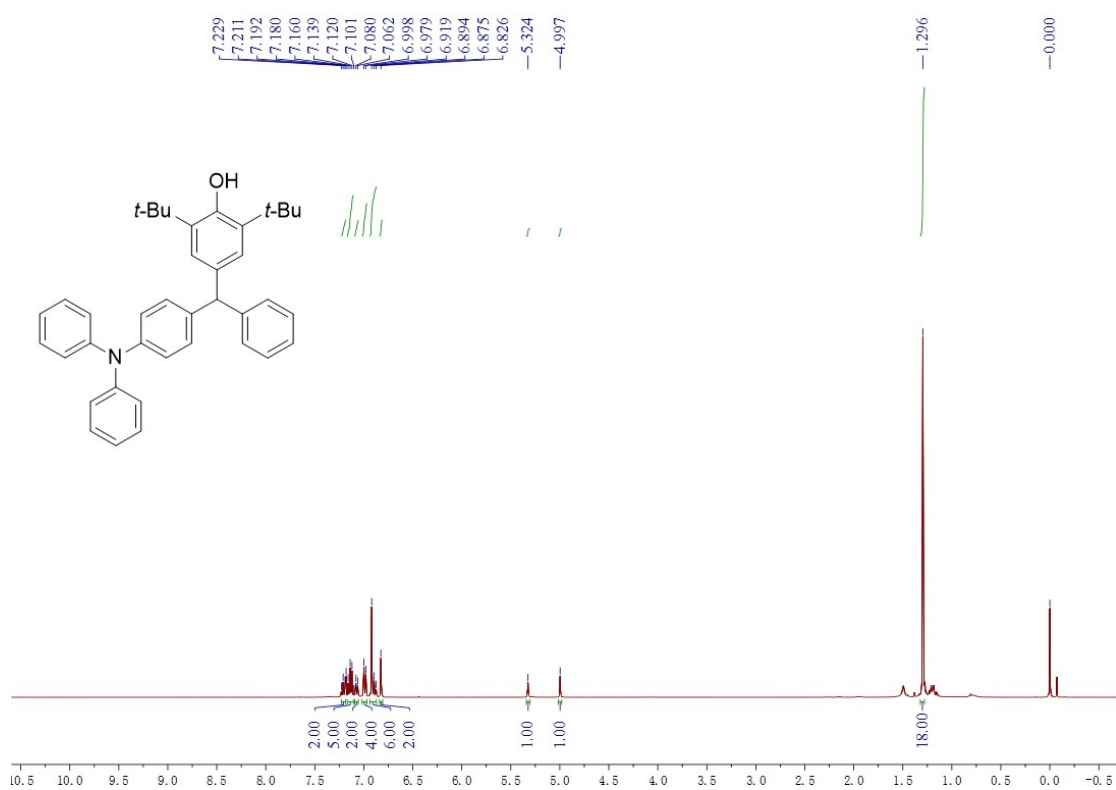

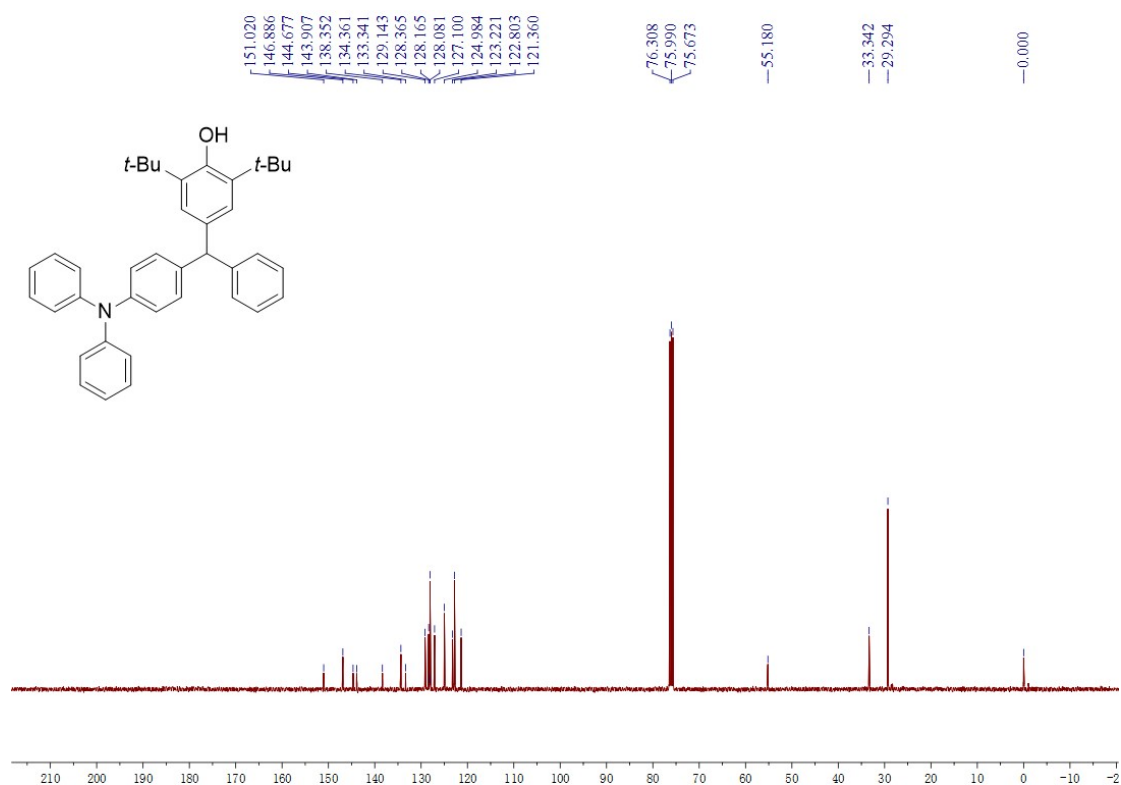

**4,4'-(((Phenylazanediy)bis(4,1-phenylene))bis(phenylmethylene))bis(2,6-di-tert-butylphenol) (3u')**

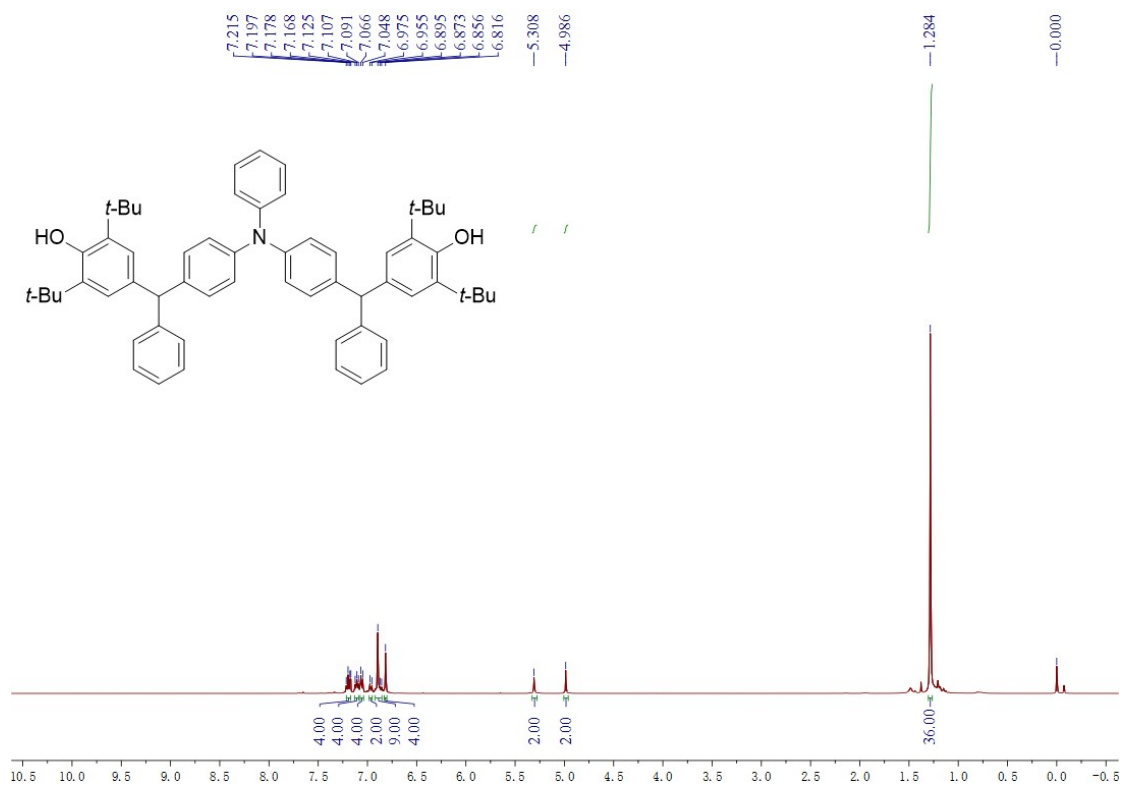

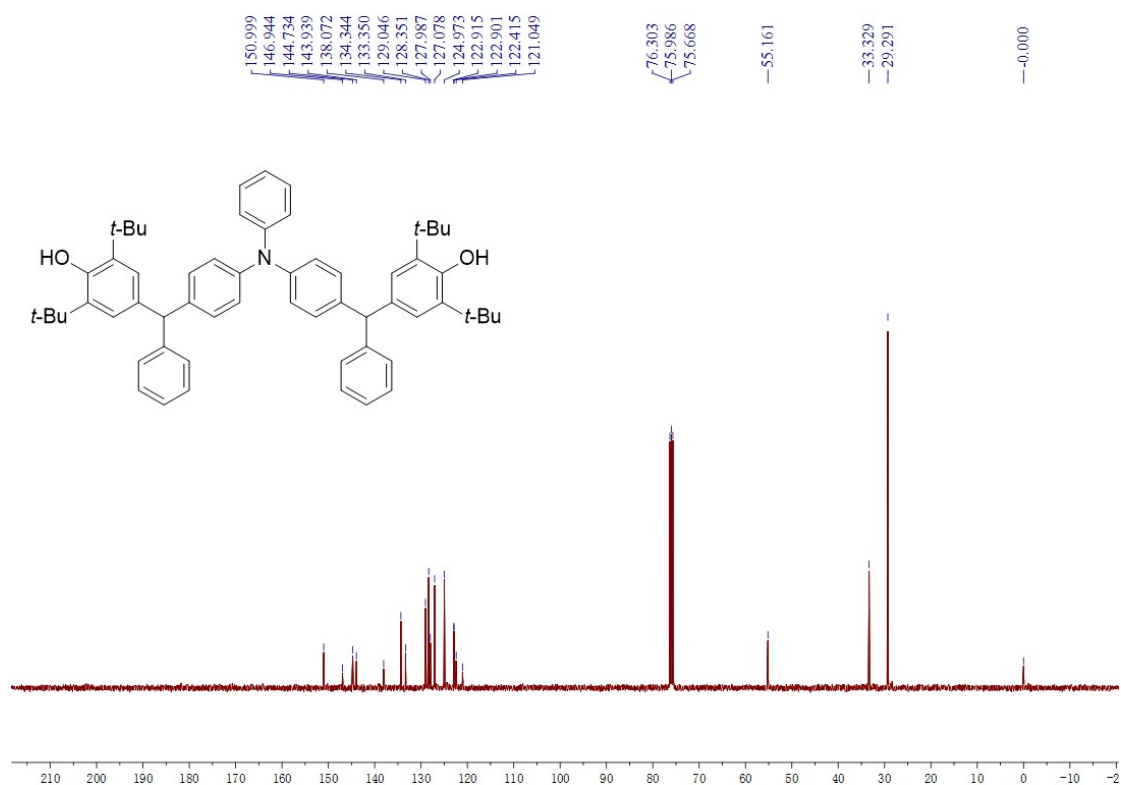

**4,4',4''-((Nitrilotris(benzene-4,1-diyl))tris(phenylmethylene))tris(2,6-di-tert-butylphenol) (3u'')**

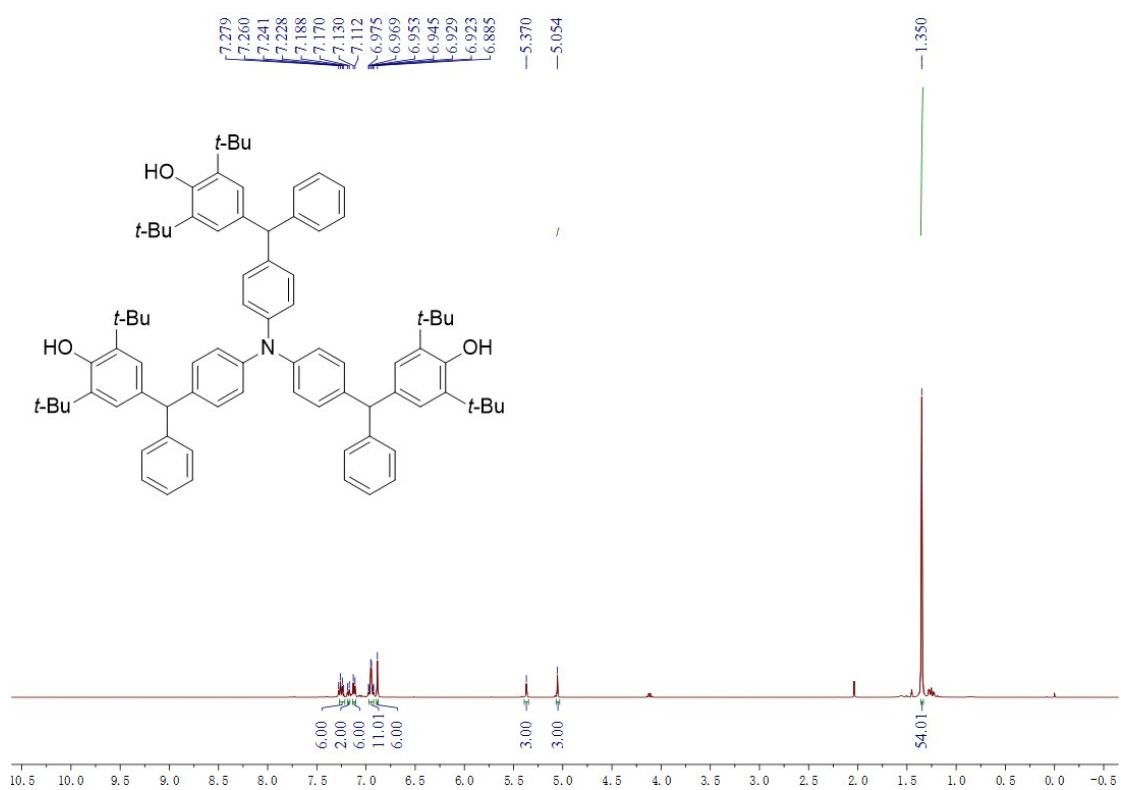

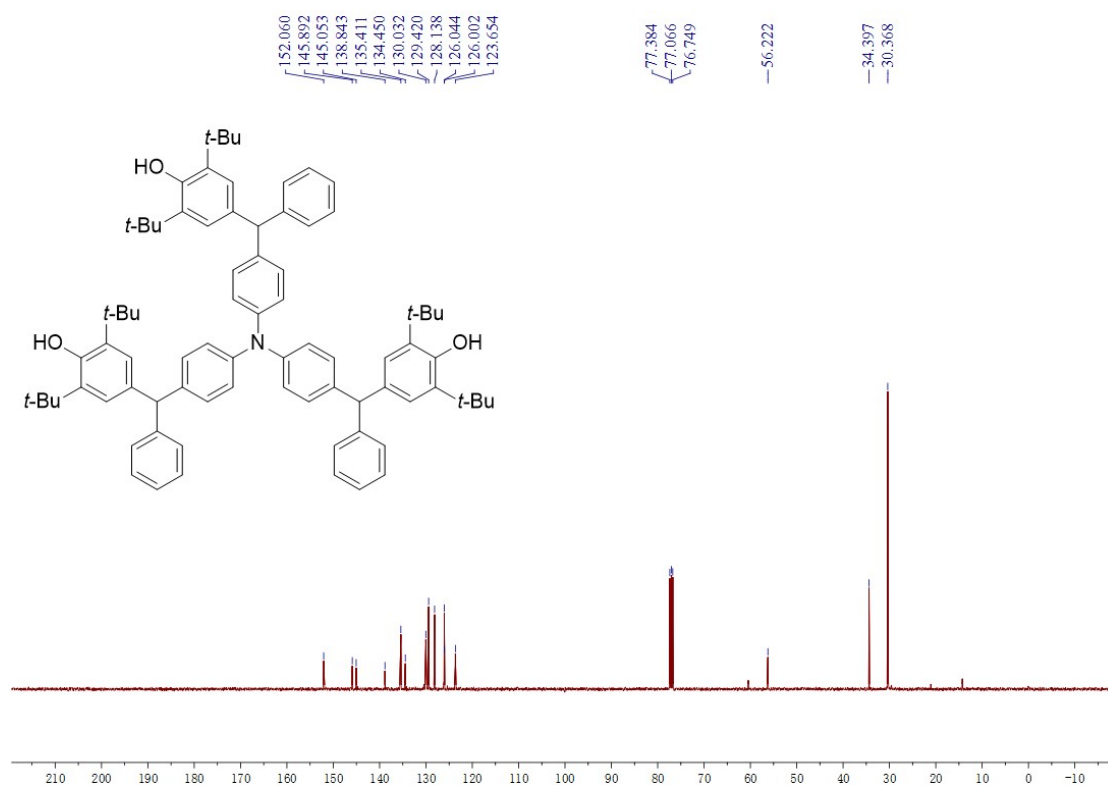

**2,6-Di-tert-butyl-4-(phenyl(4-(phenylamino)phenyl)methyl)phenol (3v)**

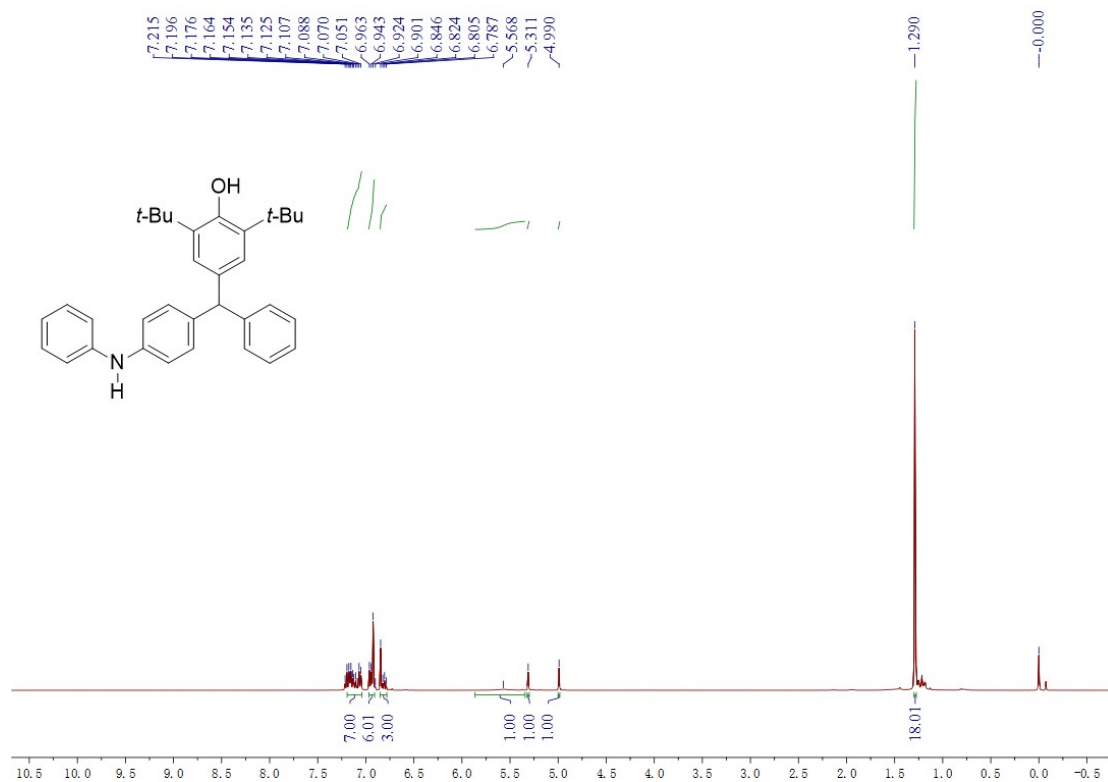

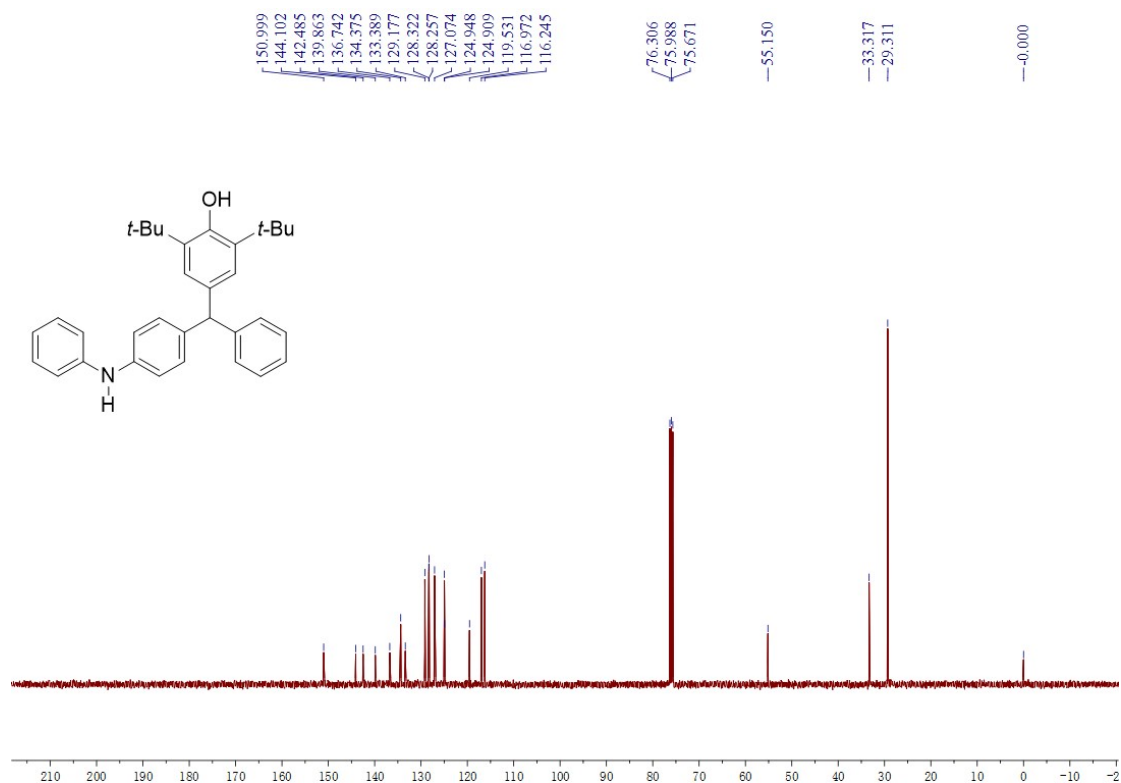

**4,4'-((Azanediylbis(4,1-phenylene))bis(phenylmethylene))bis(2,6-di-tert-butylphenol) (3v')**

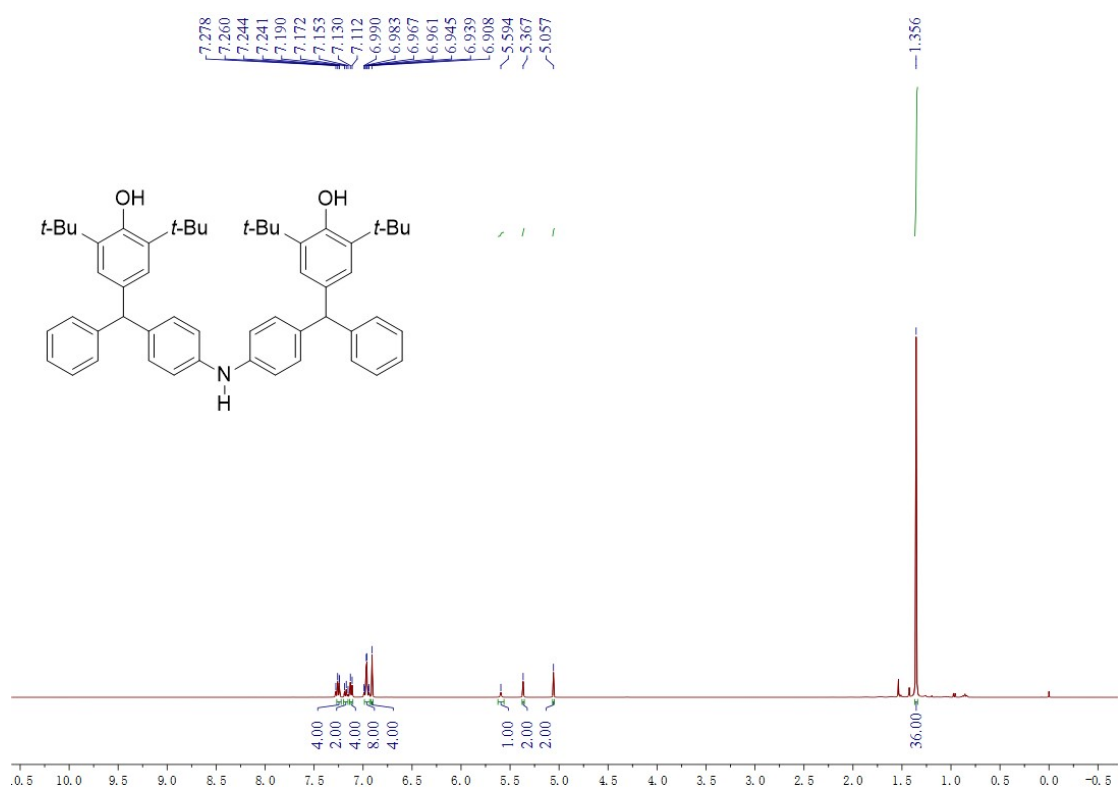

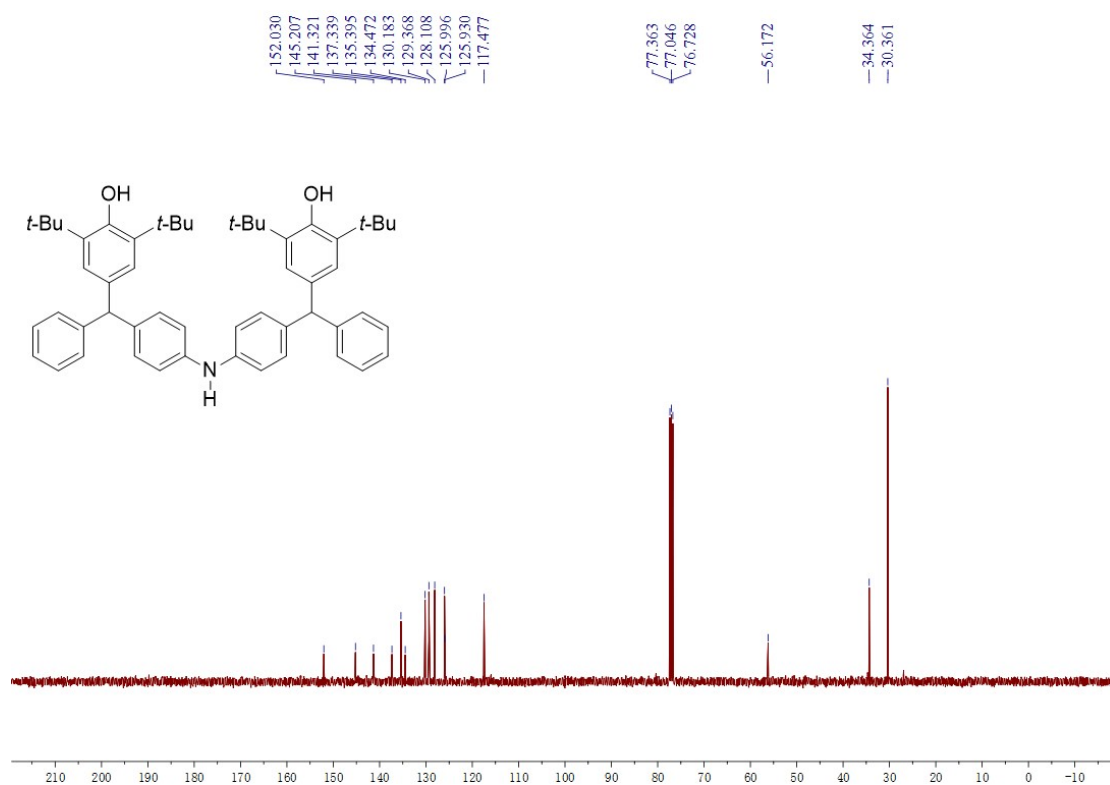

**4-((1-Aminonaphthalen-2-yl)(phenyl)methyl)-2,6-di-tert-butylphenol (3w)**

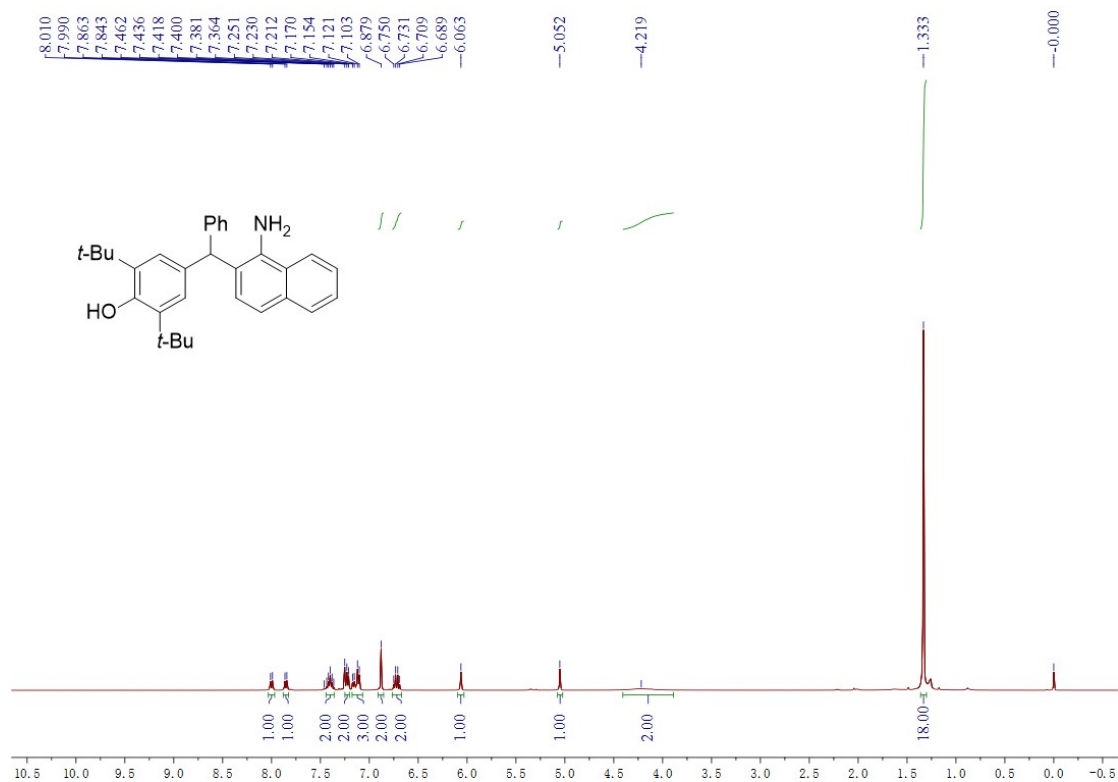

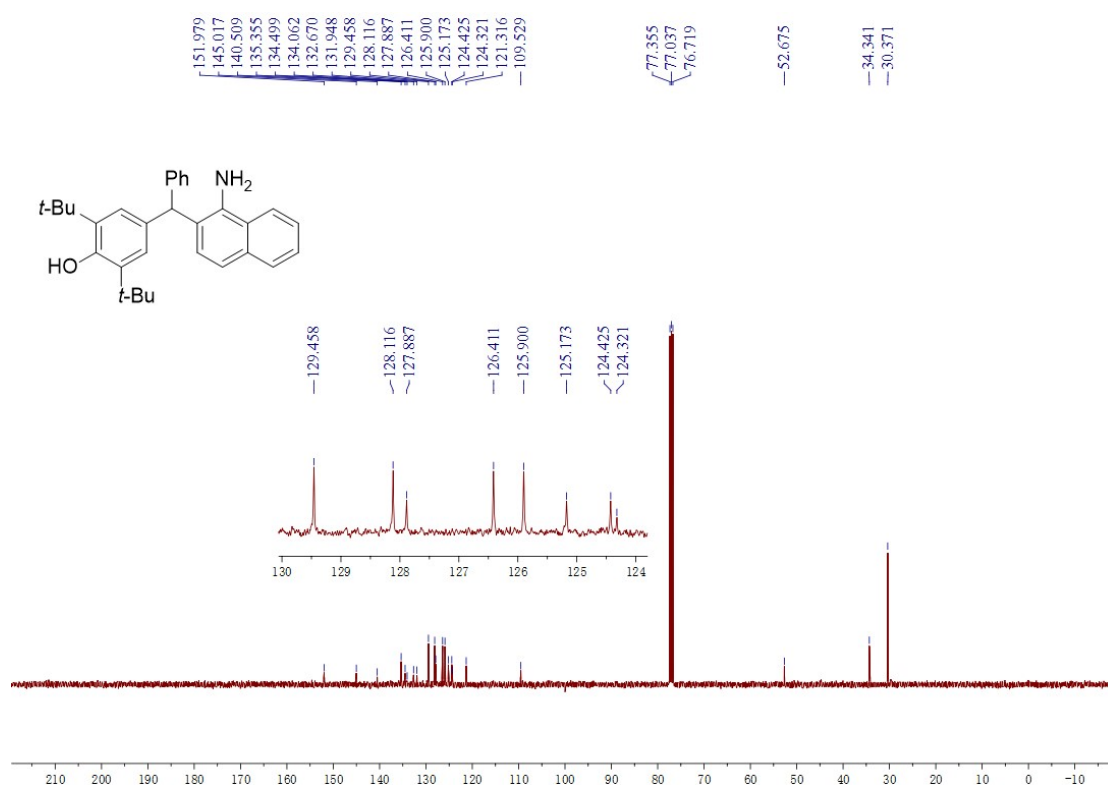

**4-((2-Aminonaphthalen-1-yl)(phenyl)methyl)-2,6-di-tert-butylphenol (3x)**

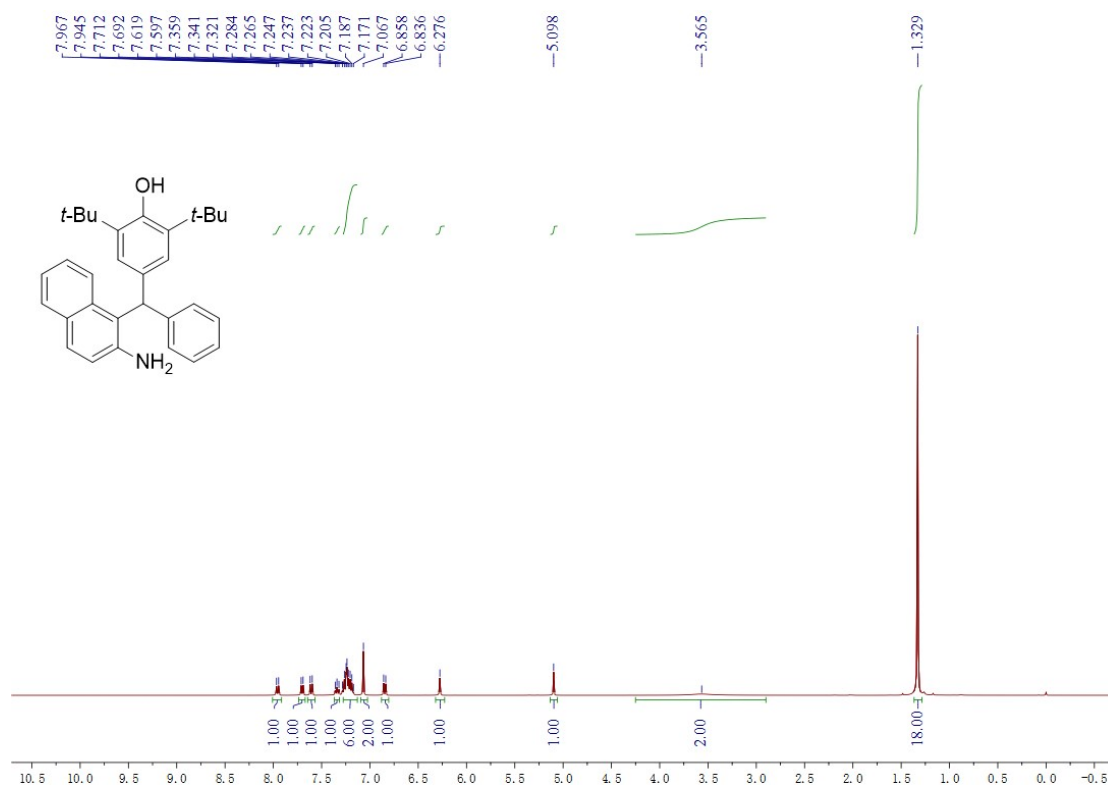

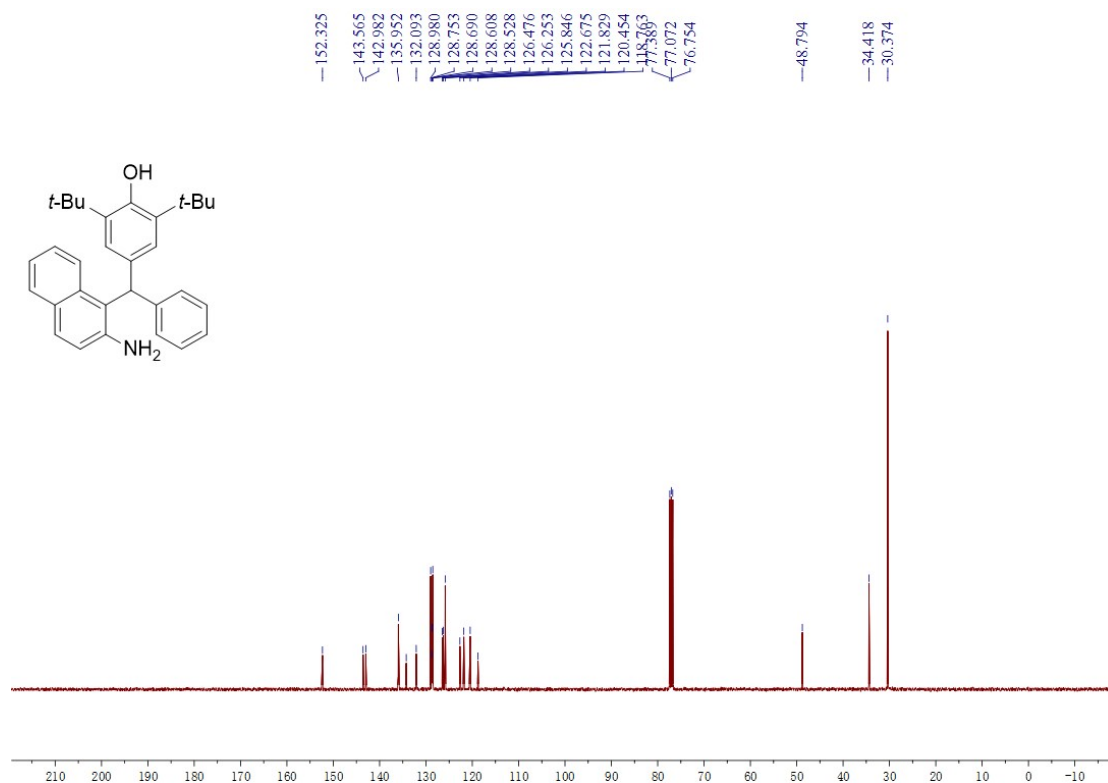

**4-((3,5-Di-tert-butyl-4-hydroxyphenyl)(phenyl)methyl)-1,5-dimethyl-2-phenyl-1,2-dihydro-3H-pyrazol-3-one (3y)**

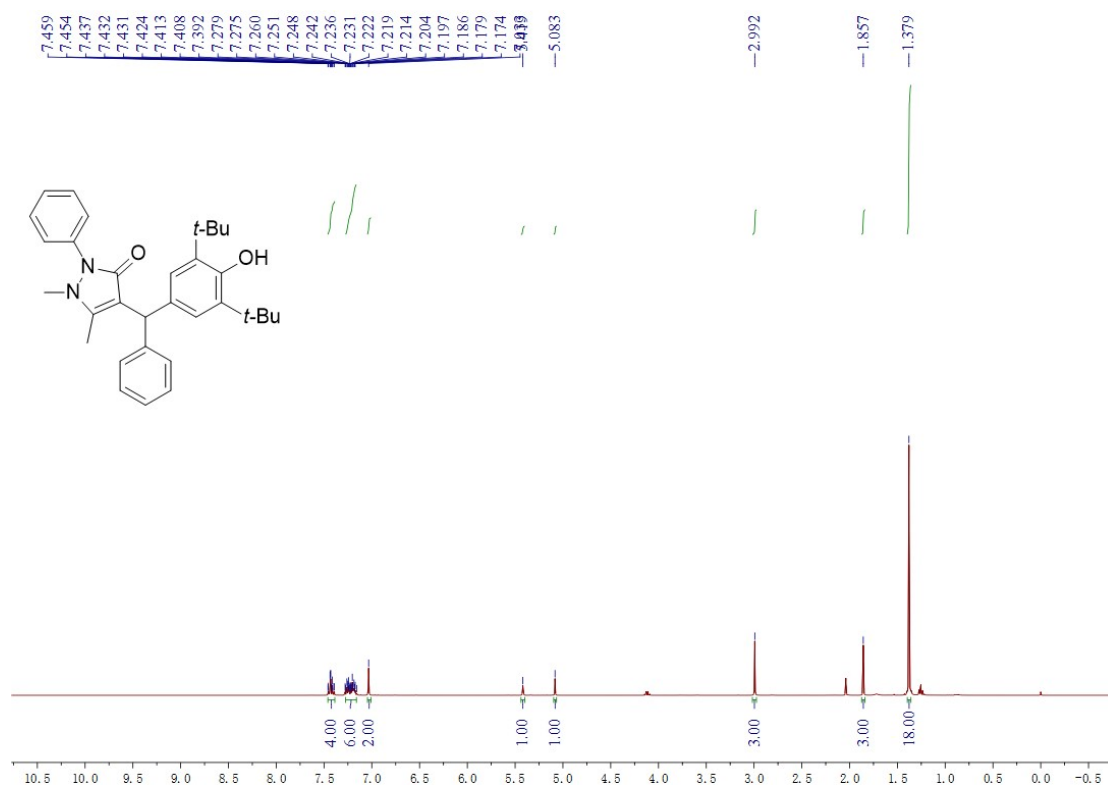



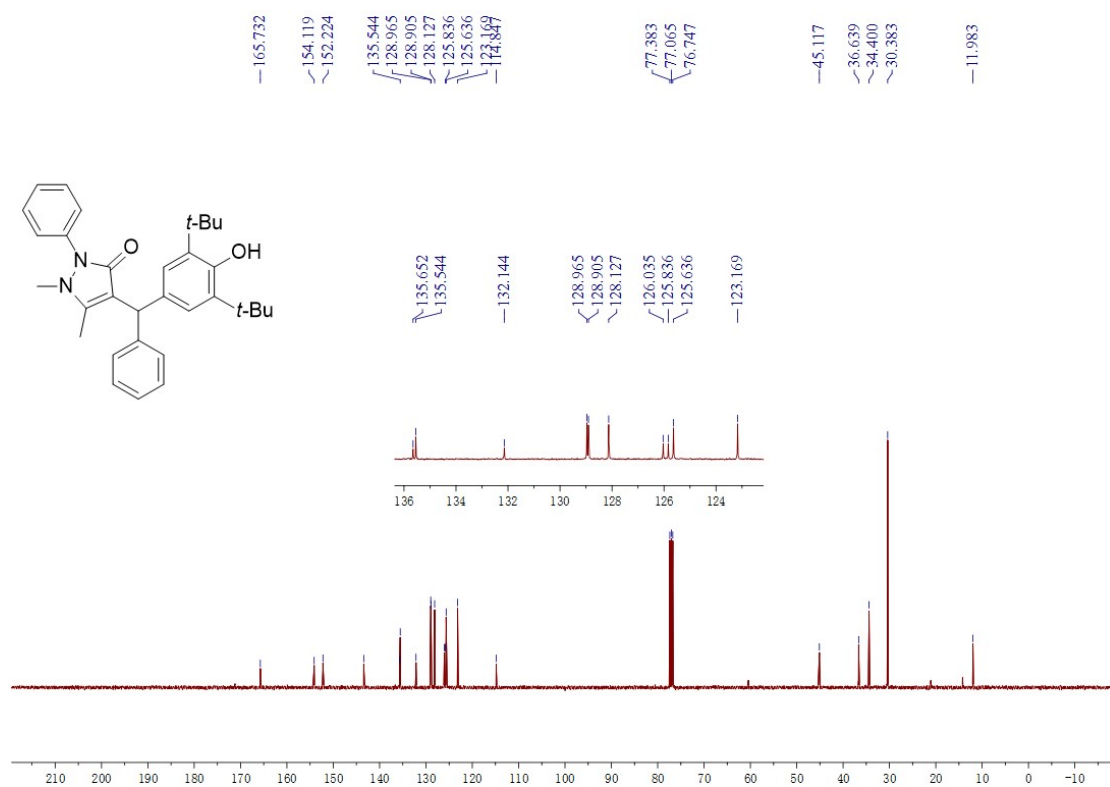

**4-((4-Amino-3-(trifluoromethyl)phenyl)(phenyl)methyl)-2,6-di-tert-butylphenol (3z)**

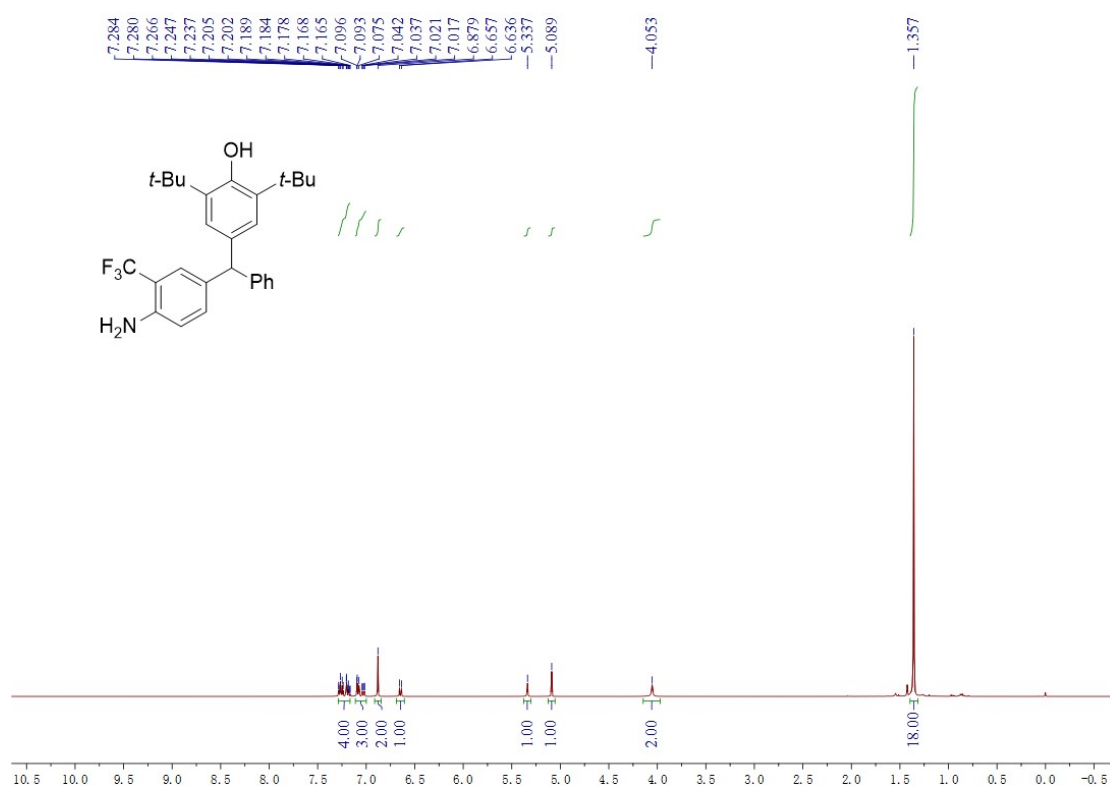

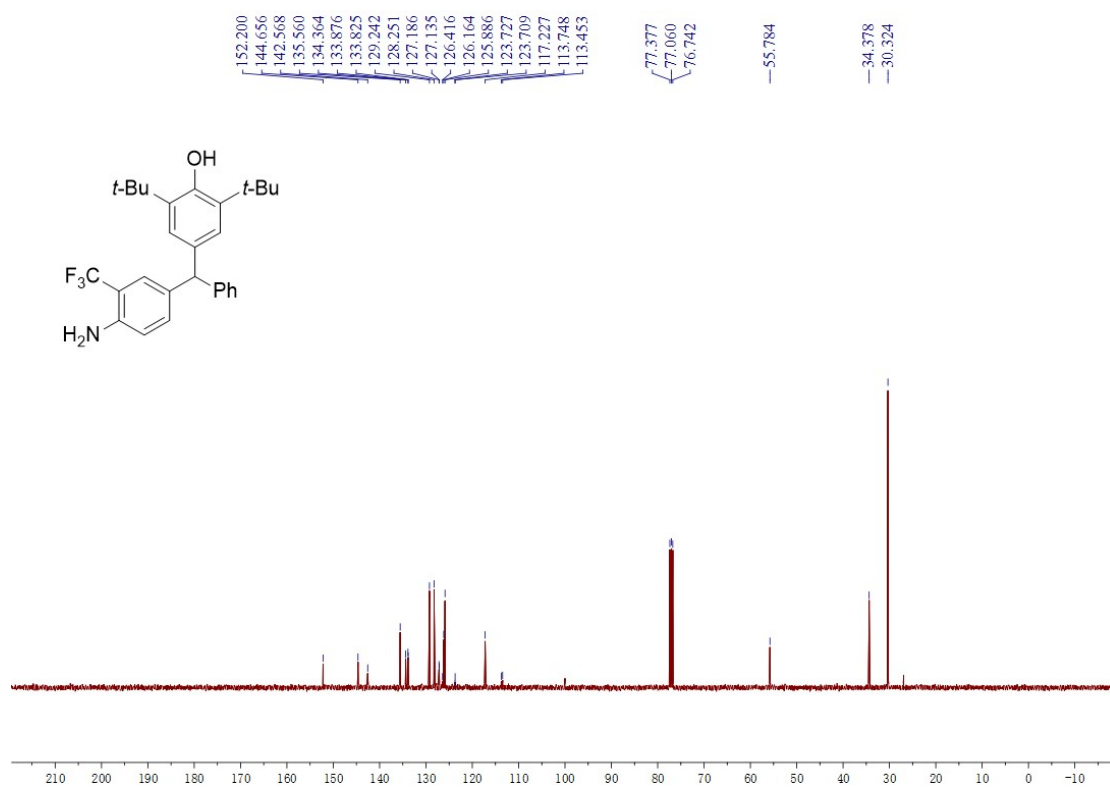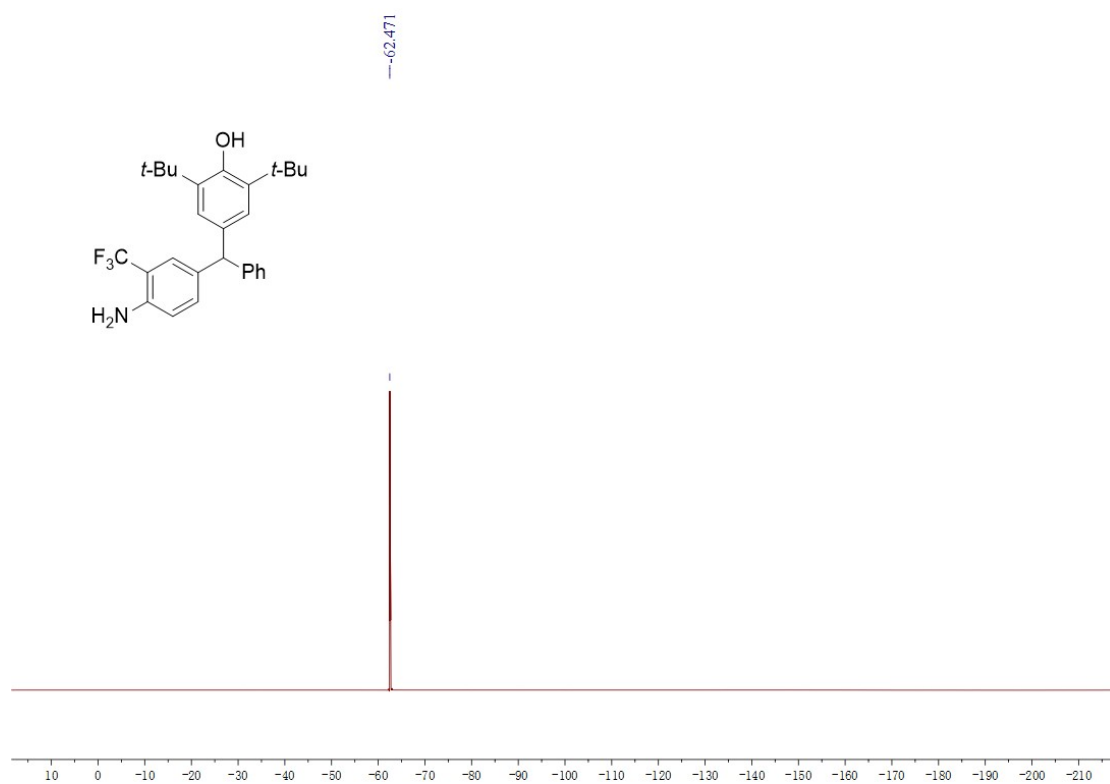

**2,6-Di-*tert*-butyl-4-(((2-nitrophenyl)amino)(phenyl)methyl)phenol (3aa')**

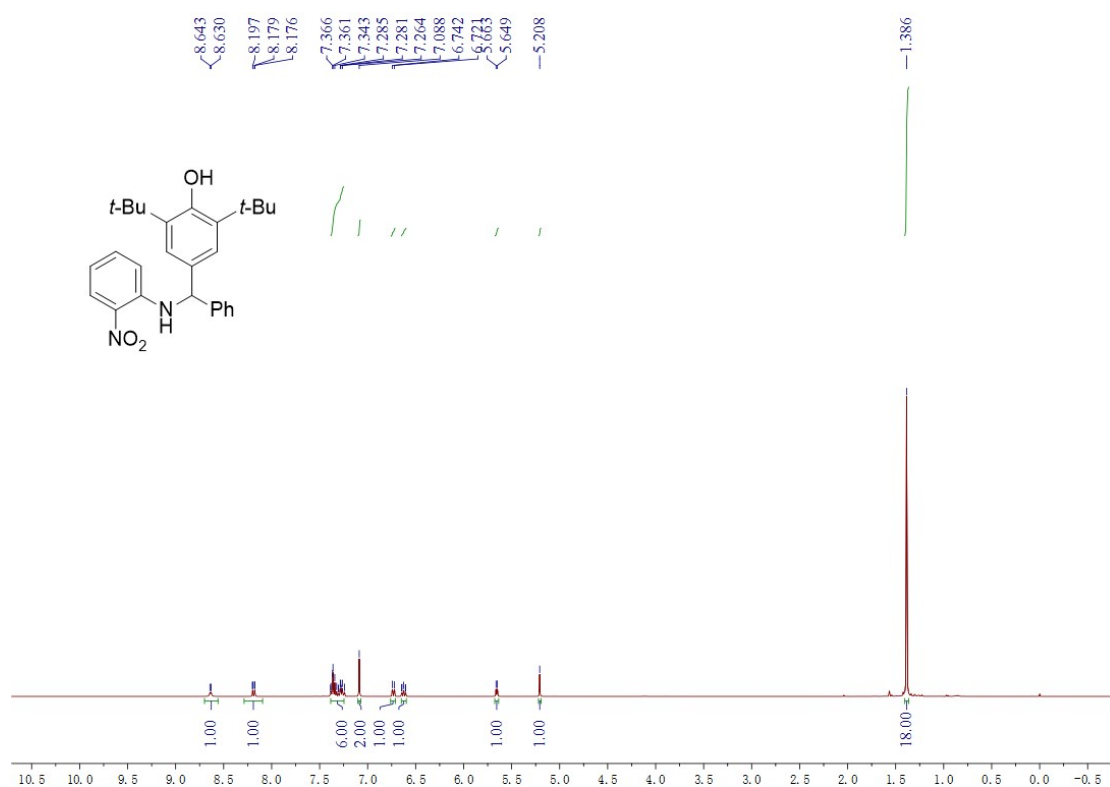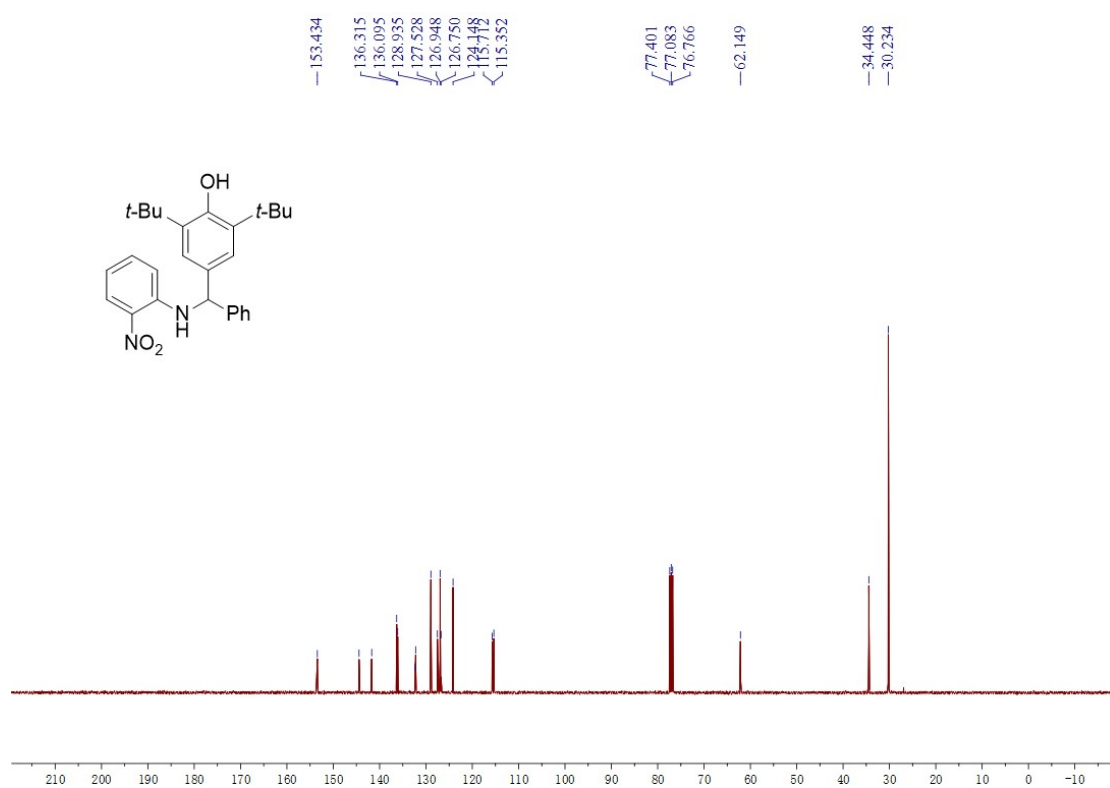

**2-(((3,5-Di-*tert*-butyl-4-hydroxyphenyl)(phenyl)methyl)amino)benzonitrile (3ab')**

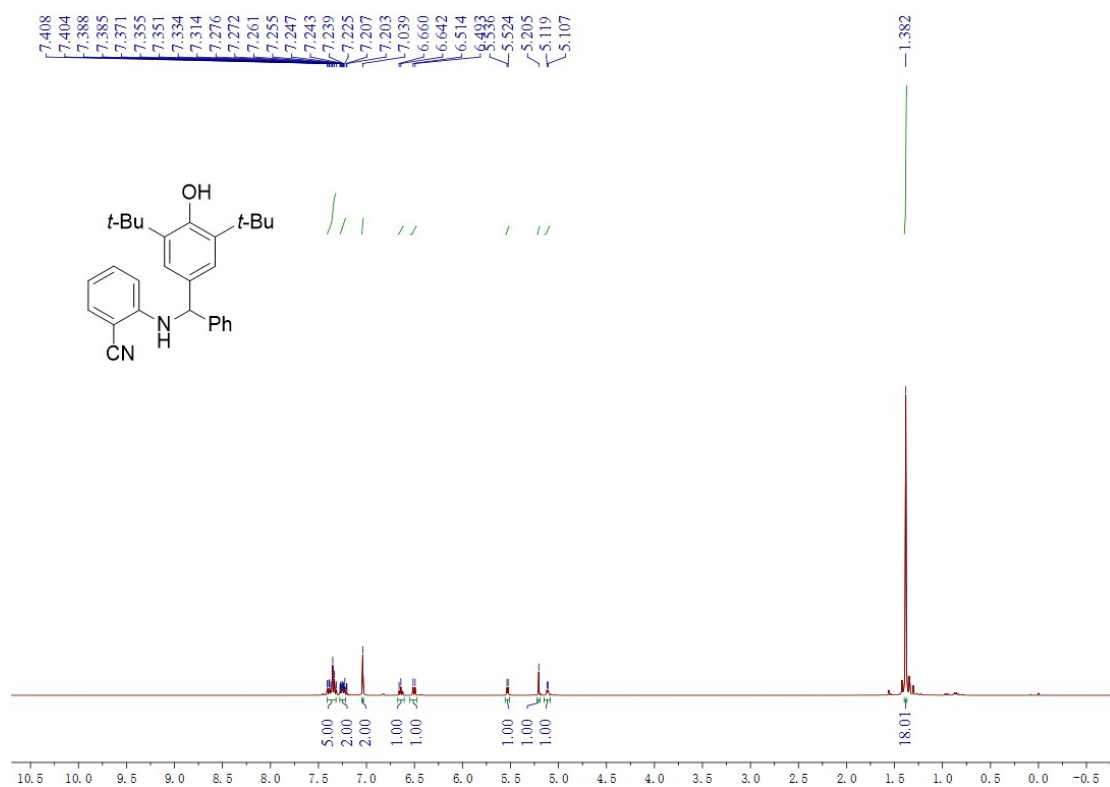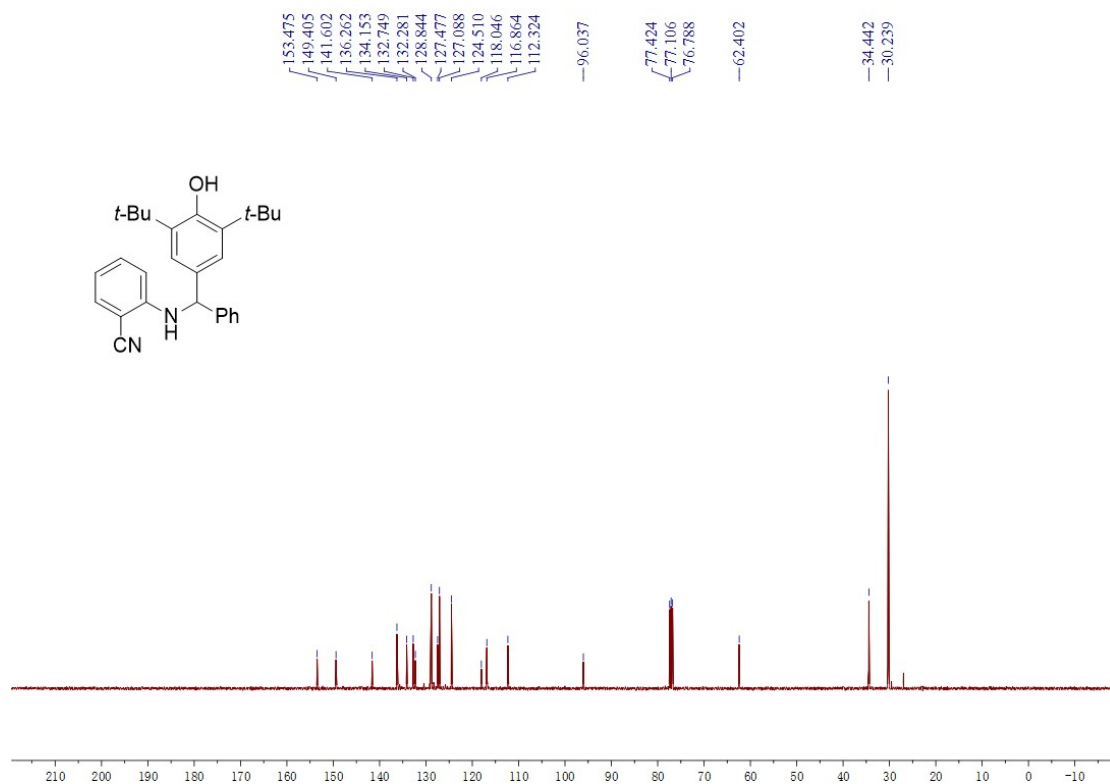

**2,6-Di-tert-butyl-4-(((3-nitrophenyl)amino)(phenyl)methyl)phenol (3ac')**

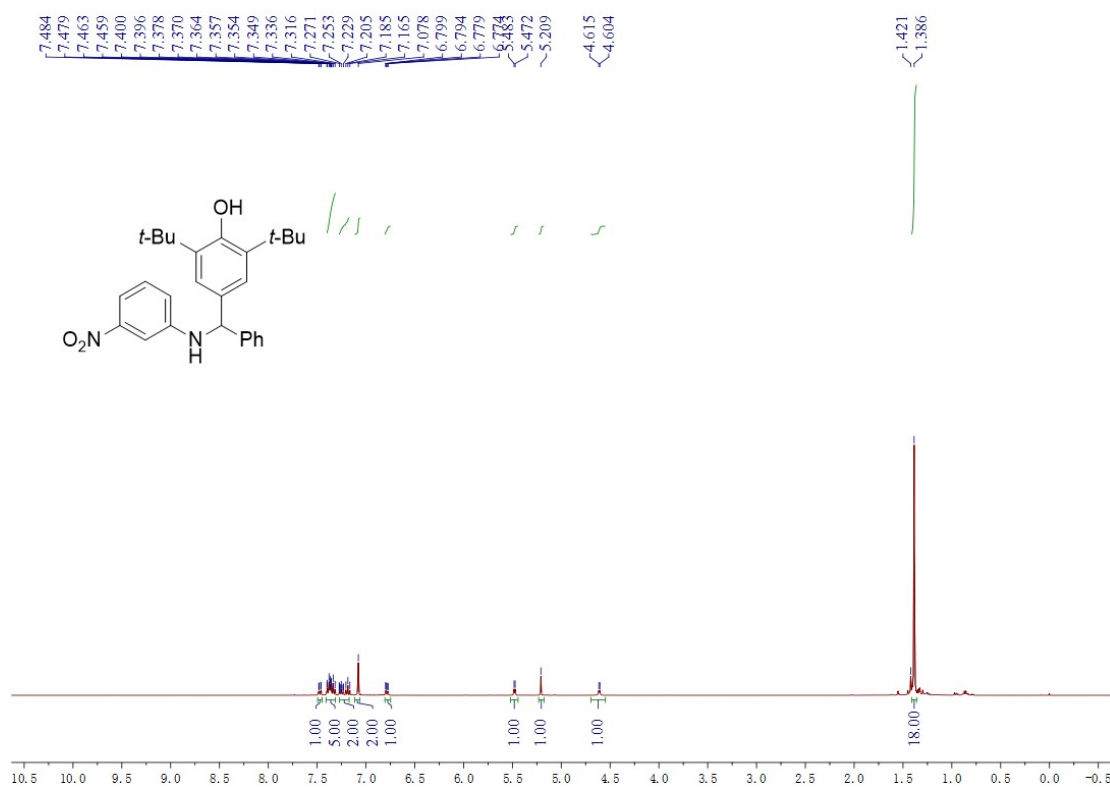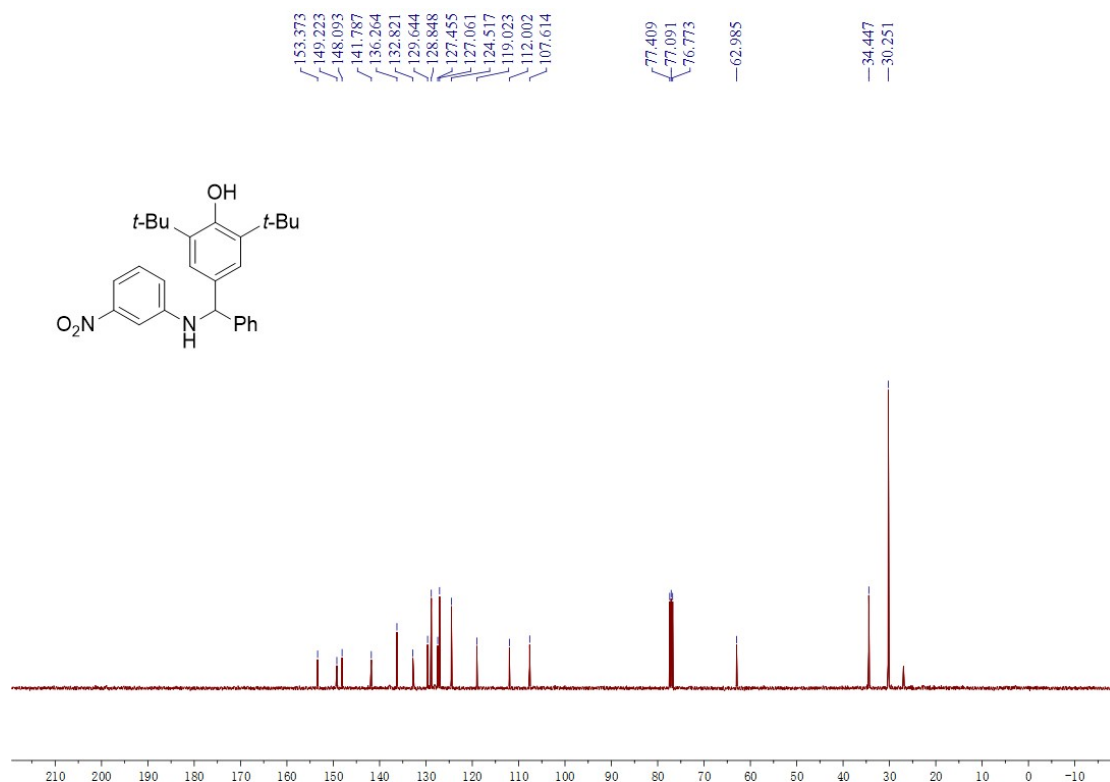

**2,6-Di-tert-butyl-4-(((4-fluoro-3-(trifluoromethyl)phenyl)amino)(phenyl)methyl)phenol (3ad')**

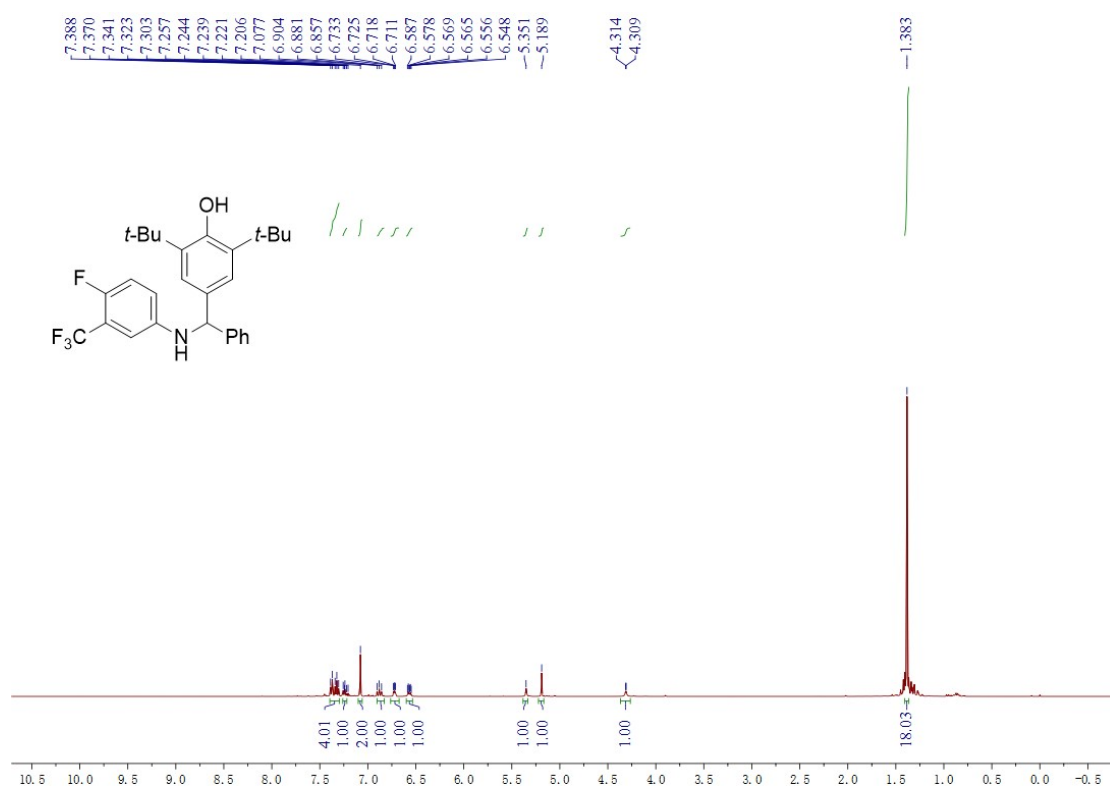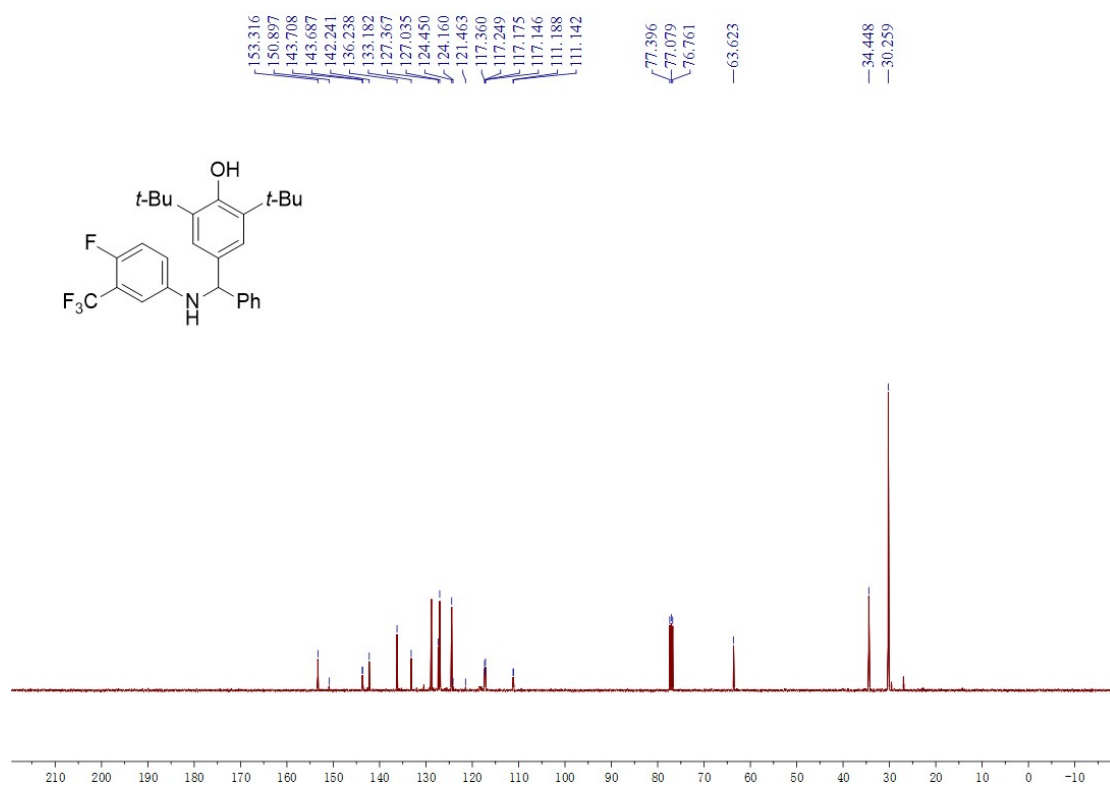

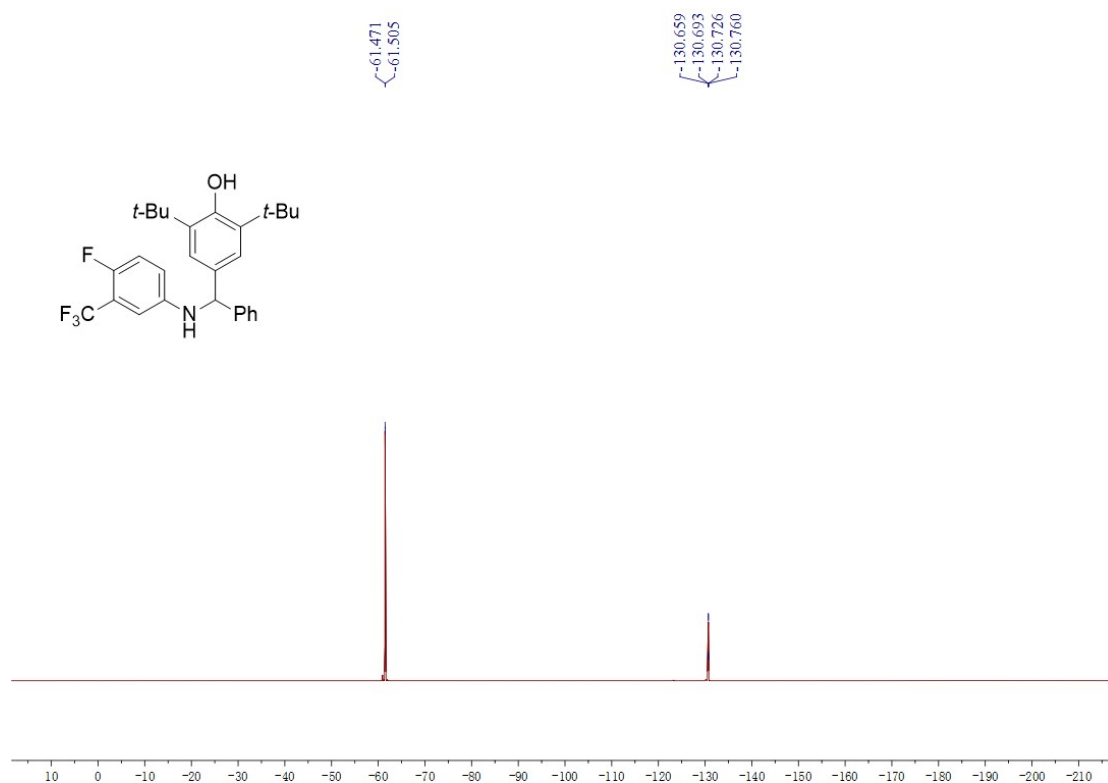

**4-(((4-Bromo-3-(trifluoromethyl)phenyl)amino)(phenyl)methyl)-2,6-di-tert-butylphenol (3ae')**

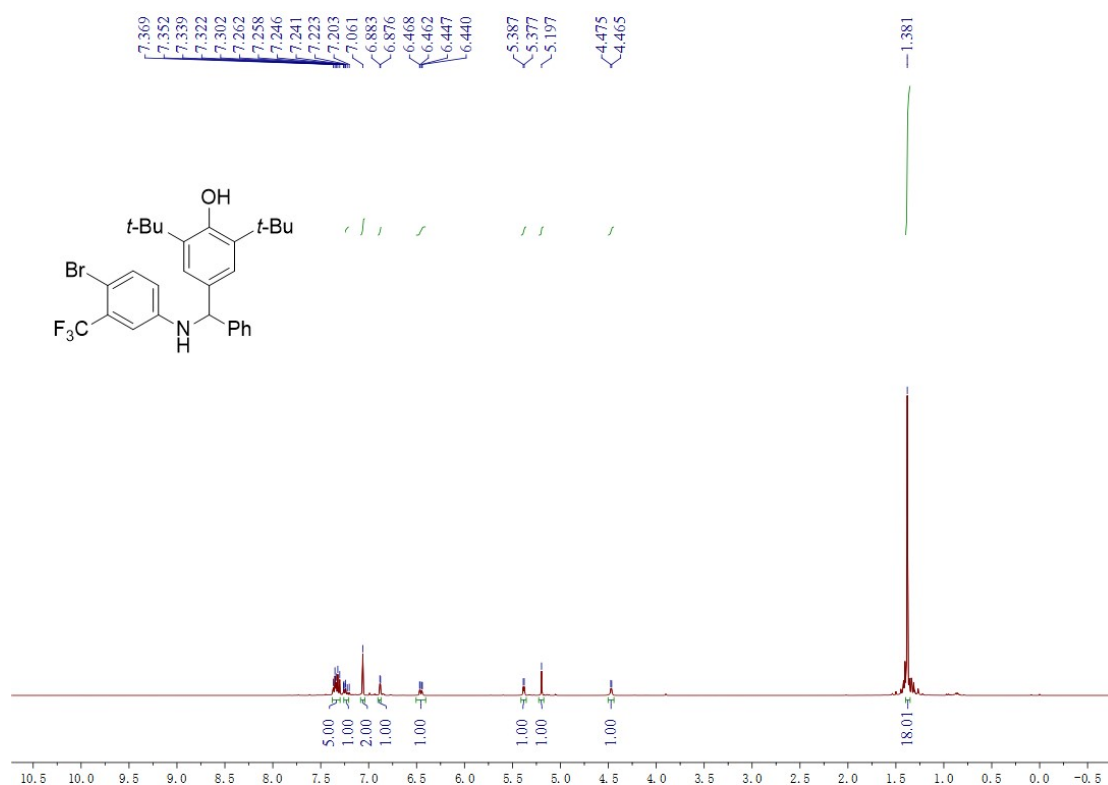

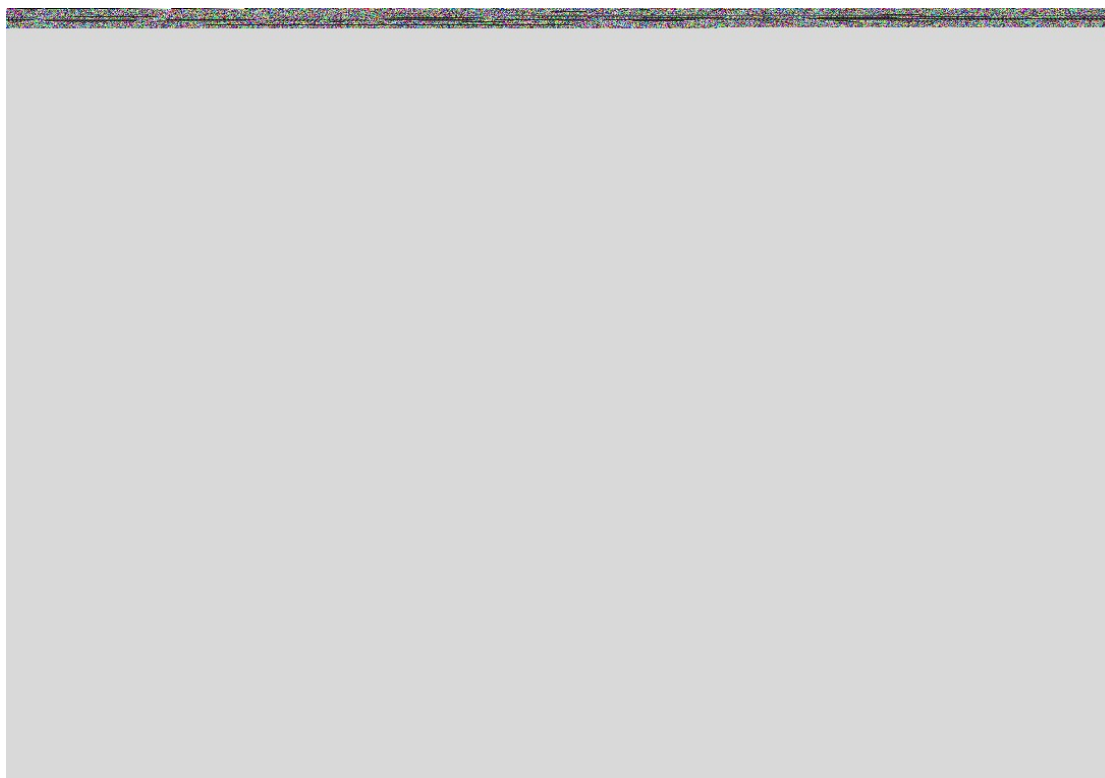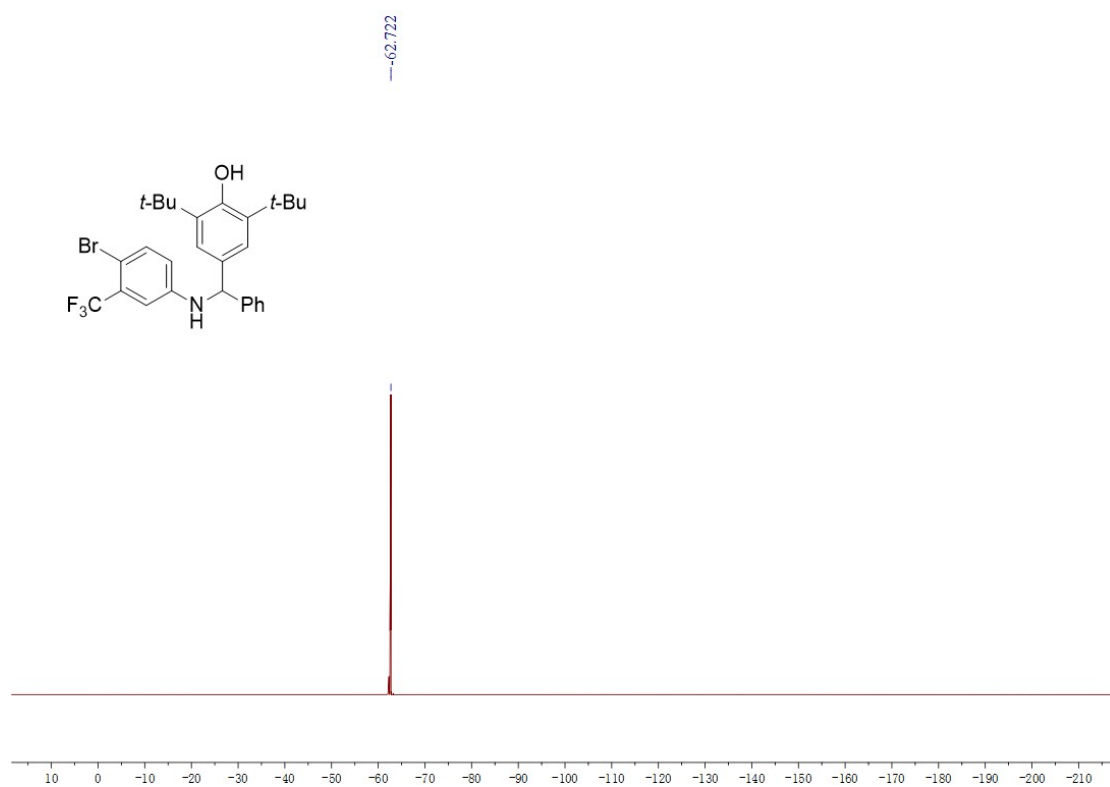

**2,6-Di-tert-butyl-4-(((2-chloro-4-(trifluoromethyl)phenyl)amino)(phenyl)methyl)ph-**



*enol (3af')*

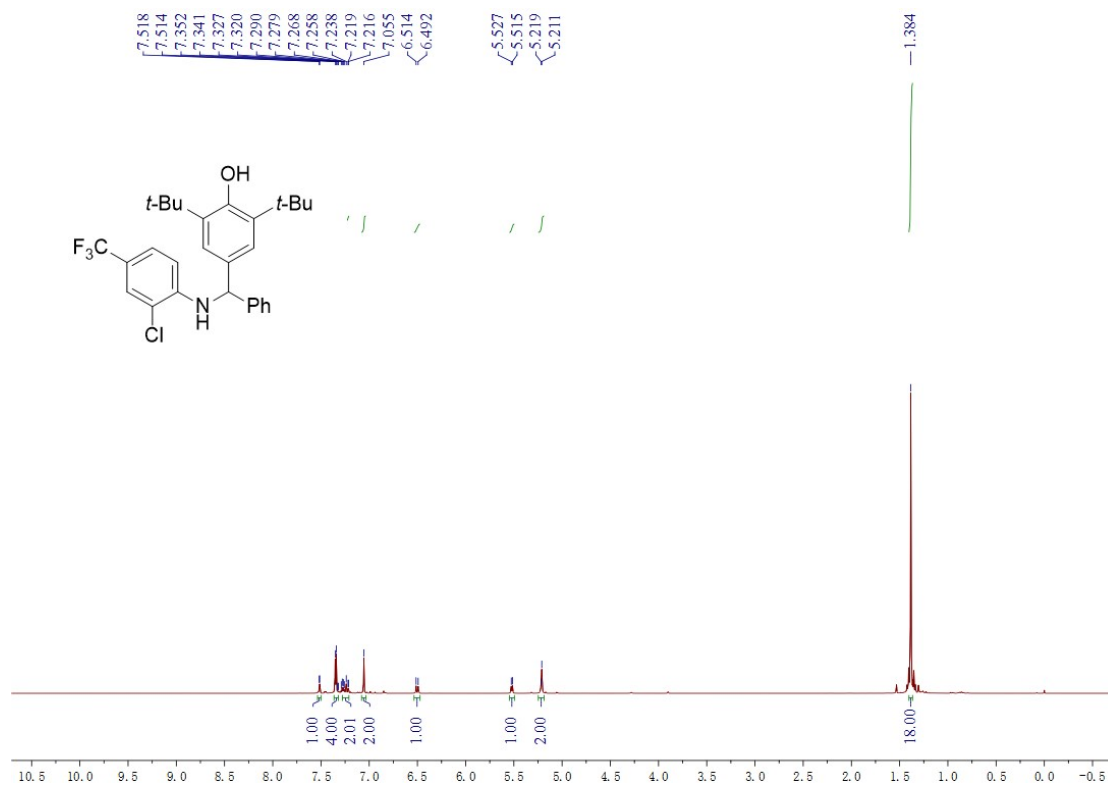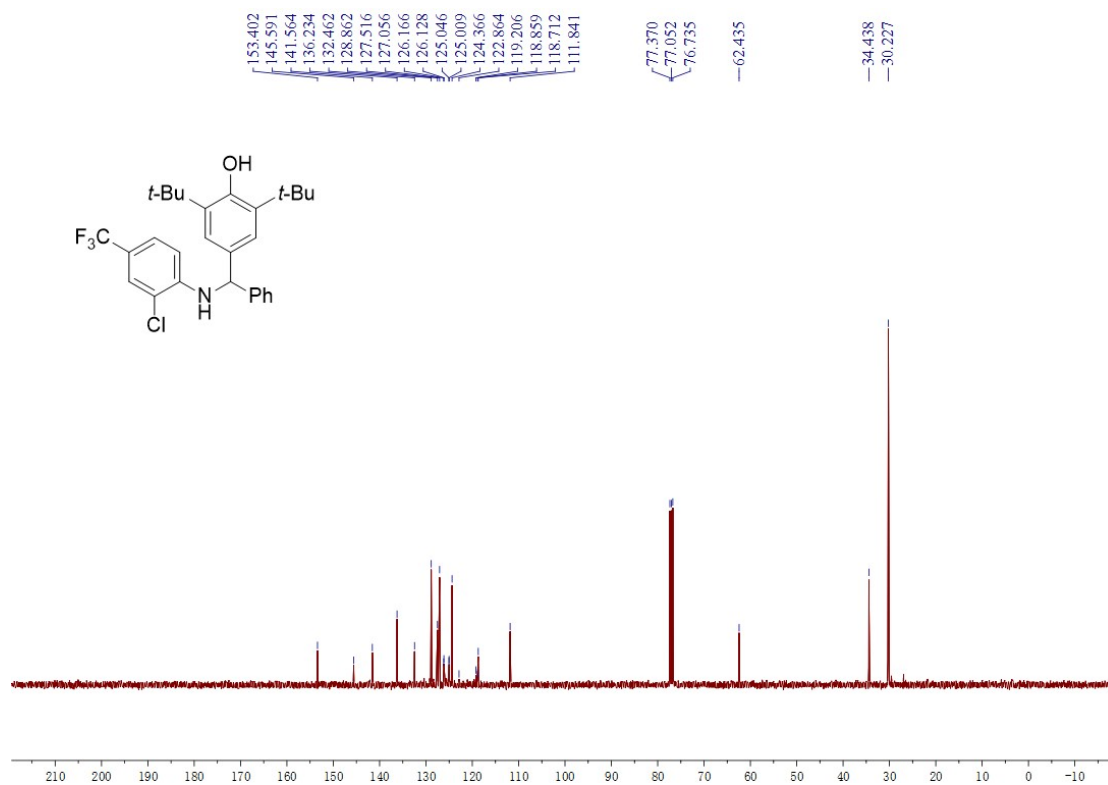

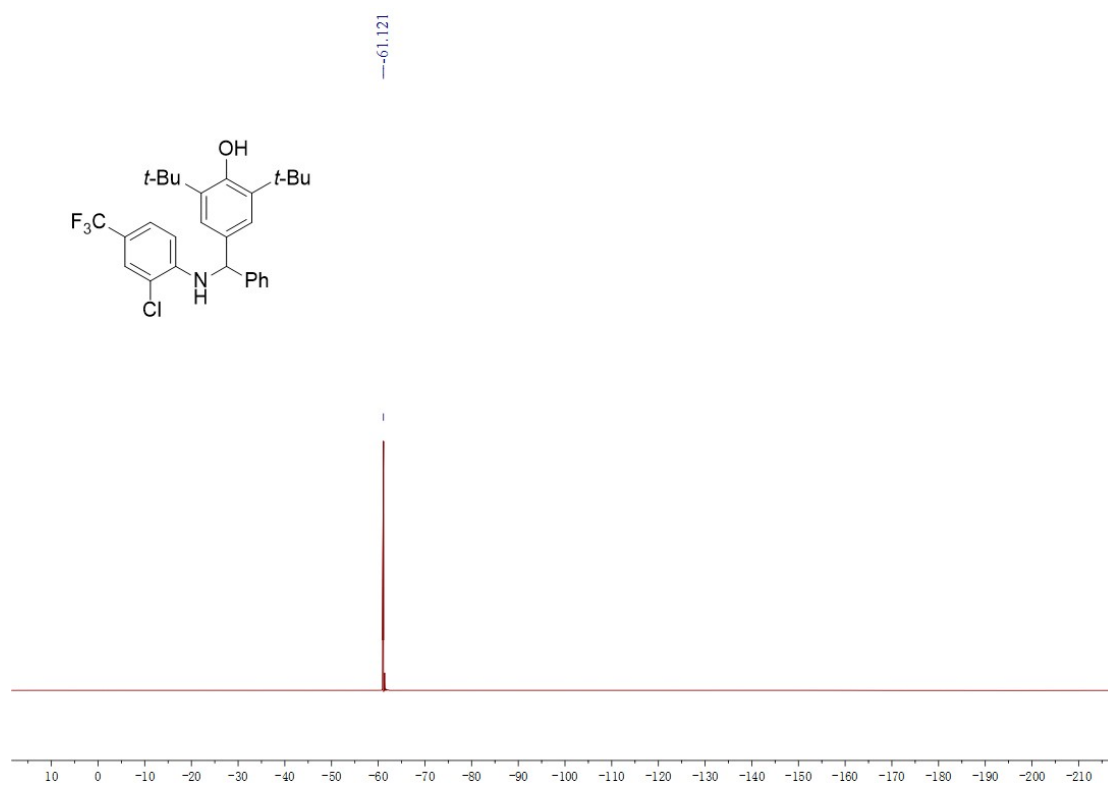

**4-((4-Aminophenyl)(p-tolyl)methyl)-2,6-di-tert-butylphenol (4a)**

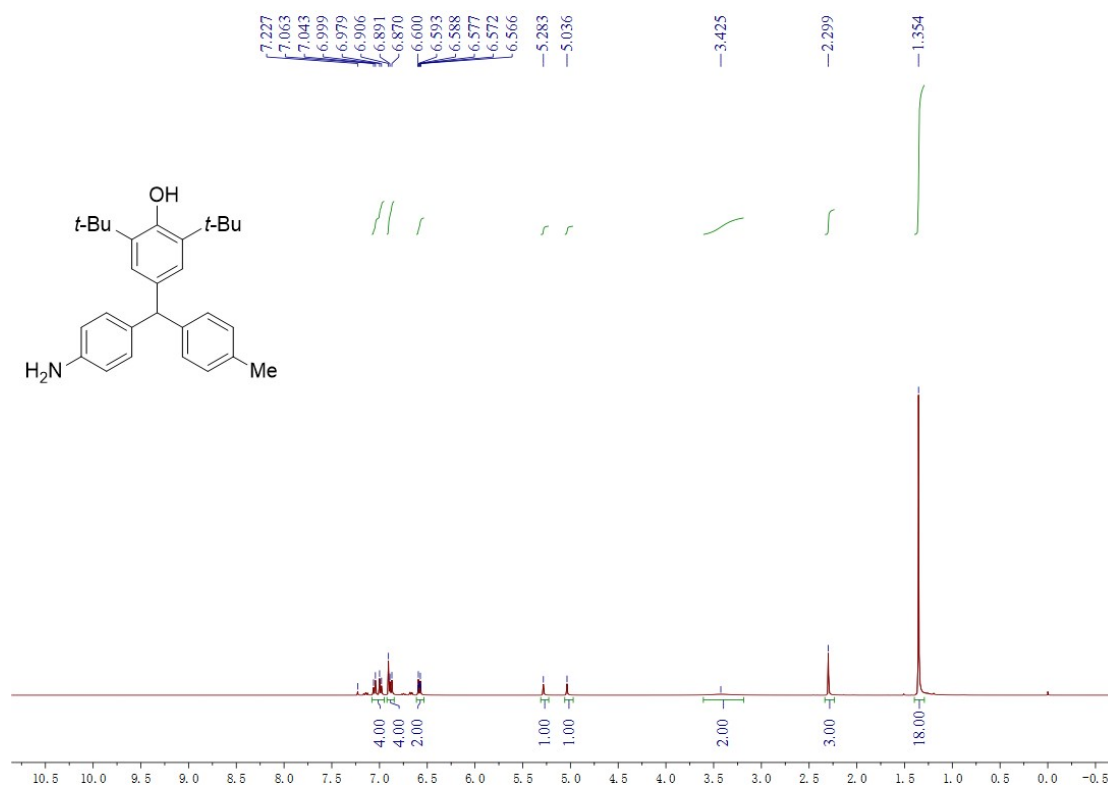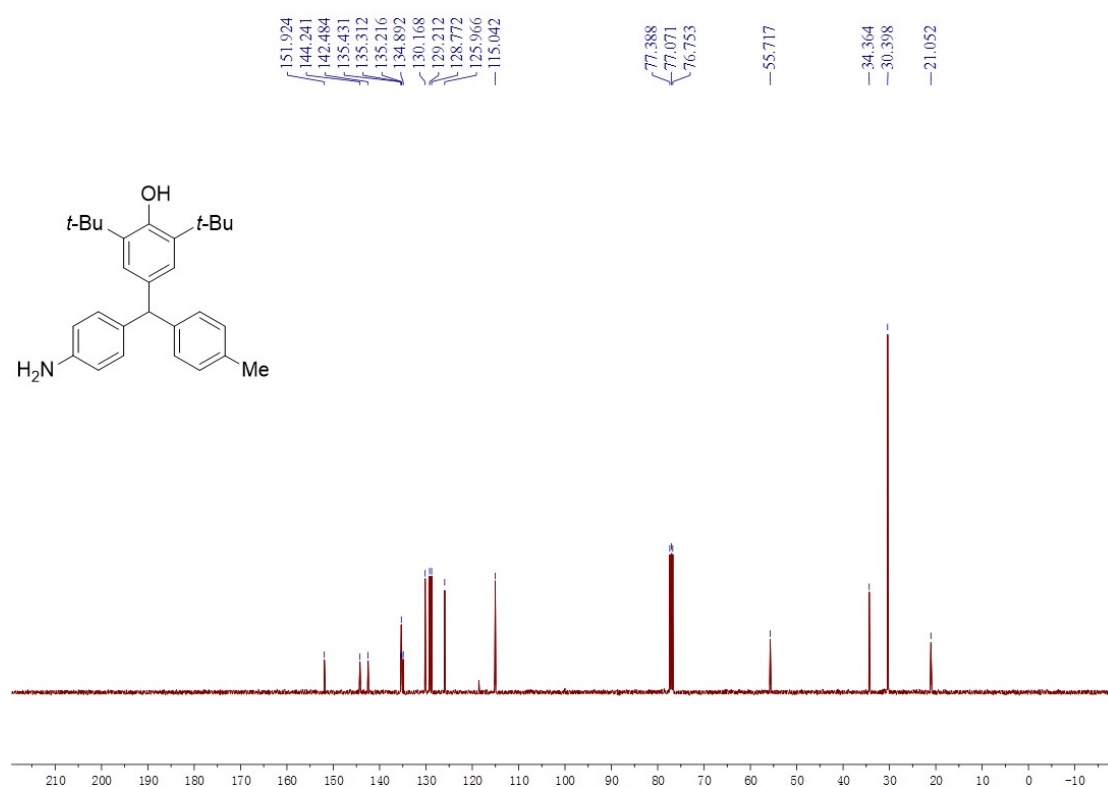

**4-((4-Aminophenyl)(o-tolyl)methyl)-2,6-di-tert-butylphenol (4b)**

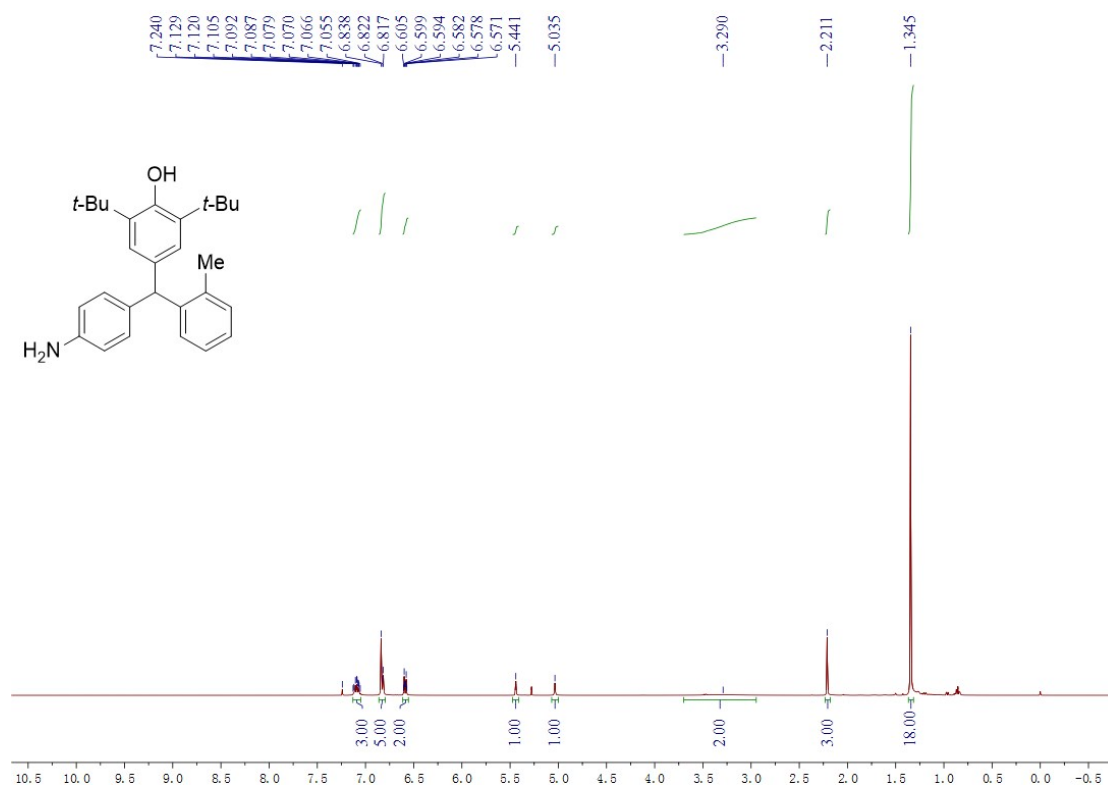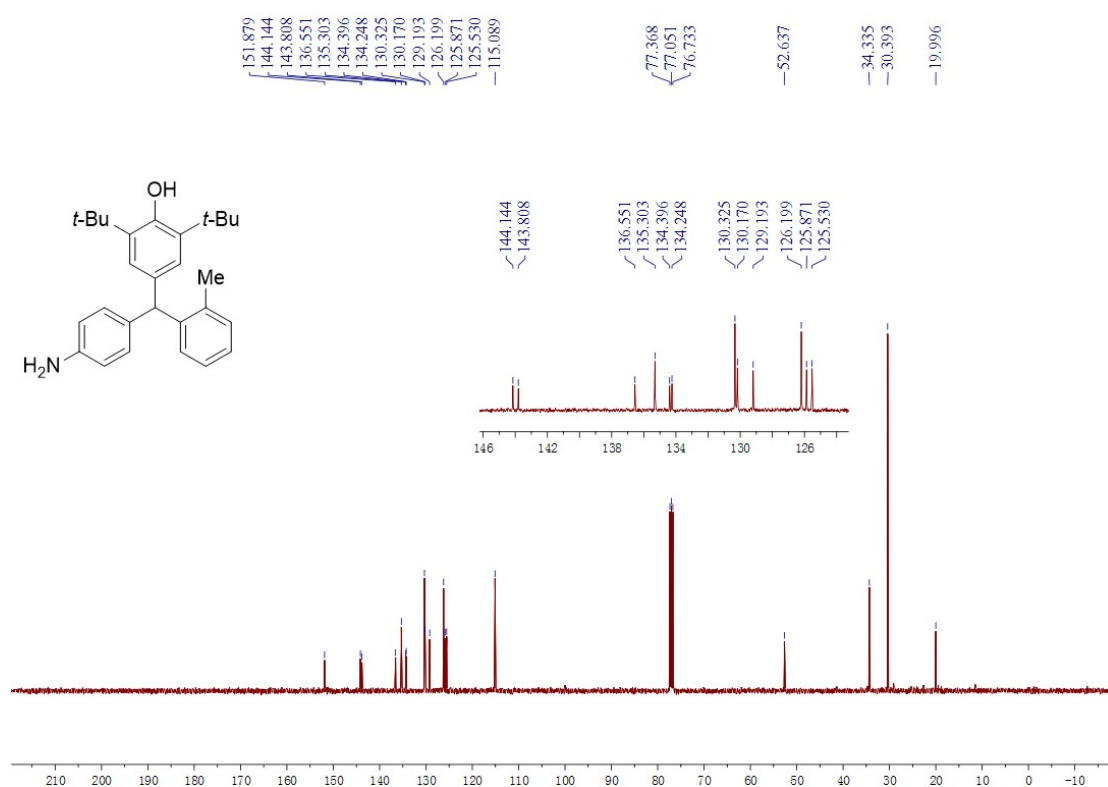

**4-((4-Aminophenyl)(4-ethylphenyl)methyl)-2,6-di-tert-butylphenol (4c)**

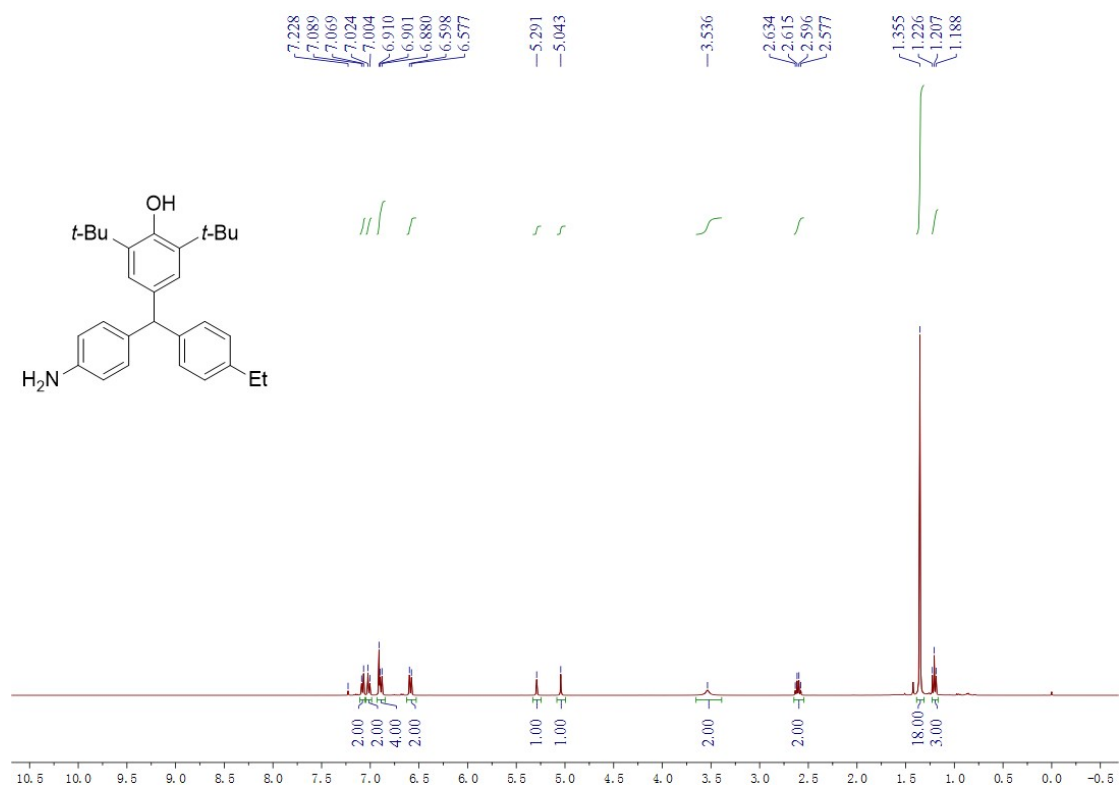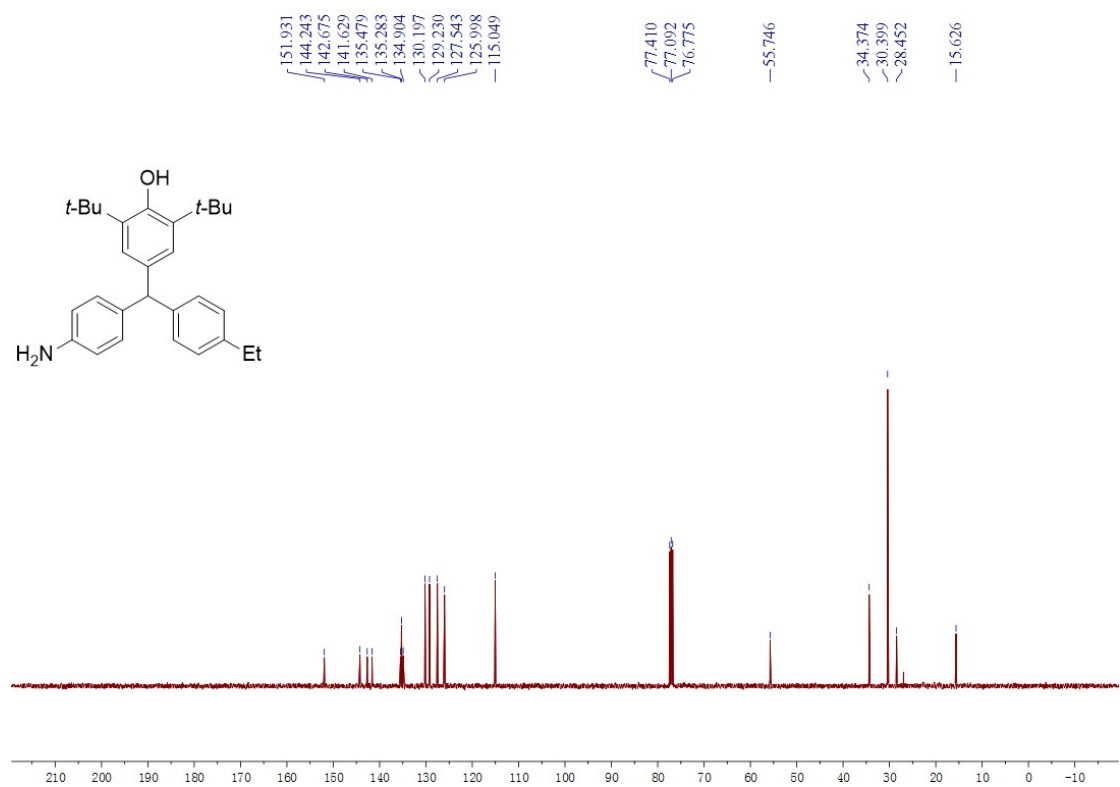

**4-((4-Aminophenyl)(4-(tert-butyl)phenyl)methyl)-2,6-di-tert-butylphenol (4d)**

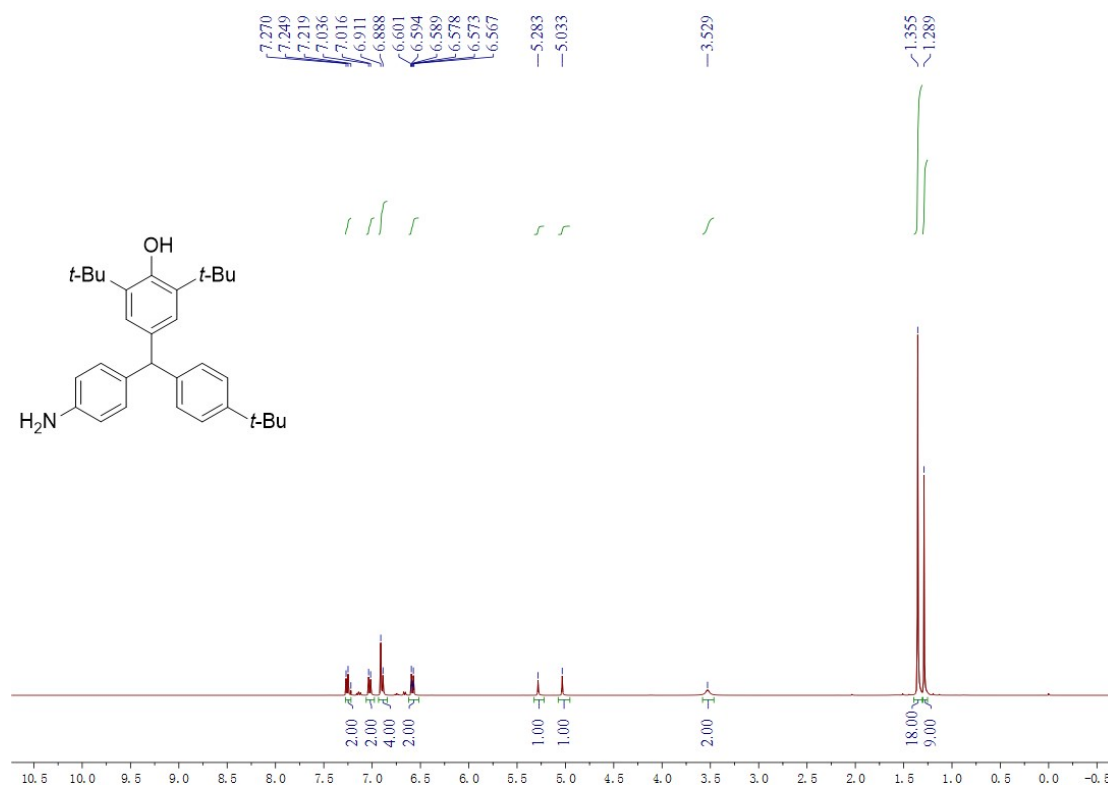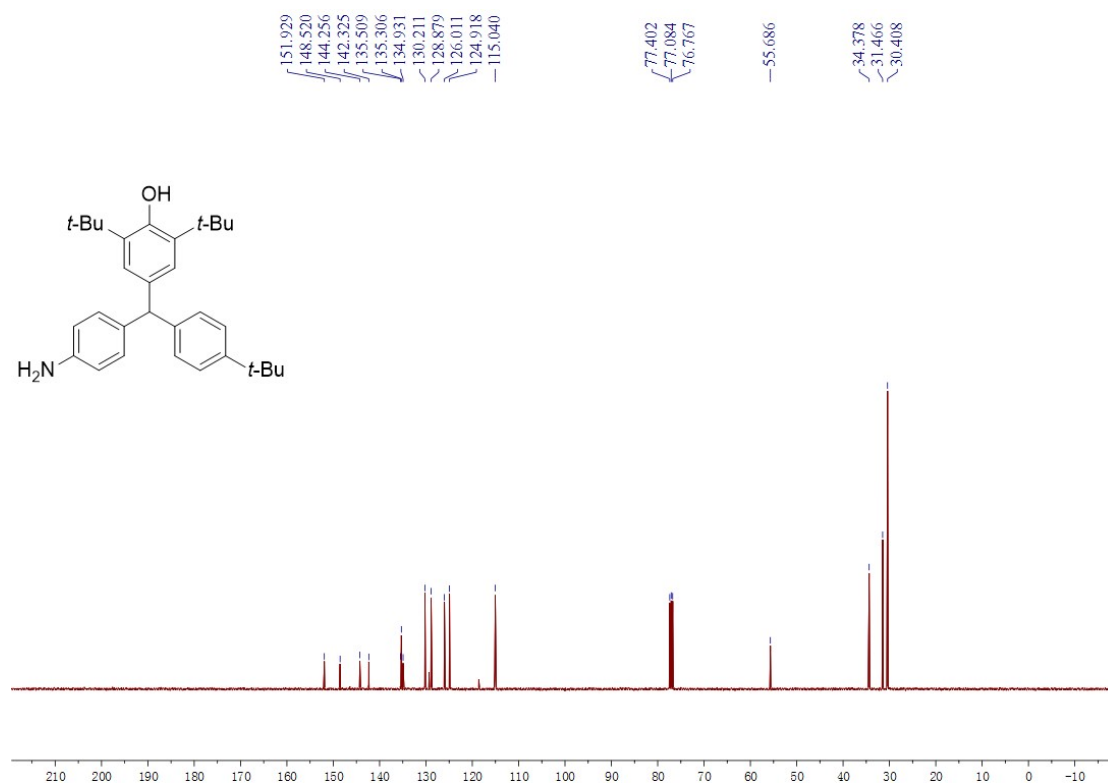

**4-((4-Aminophenyl)(3-methoxyphenyl)methyl)-2,6-di-tert-butylphenol (4e)**

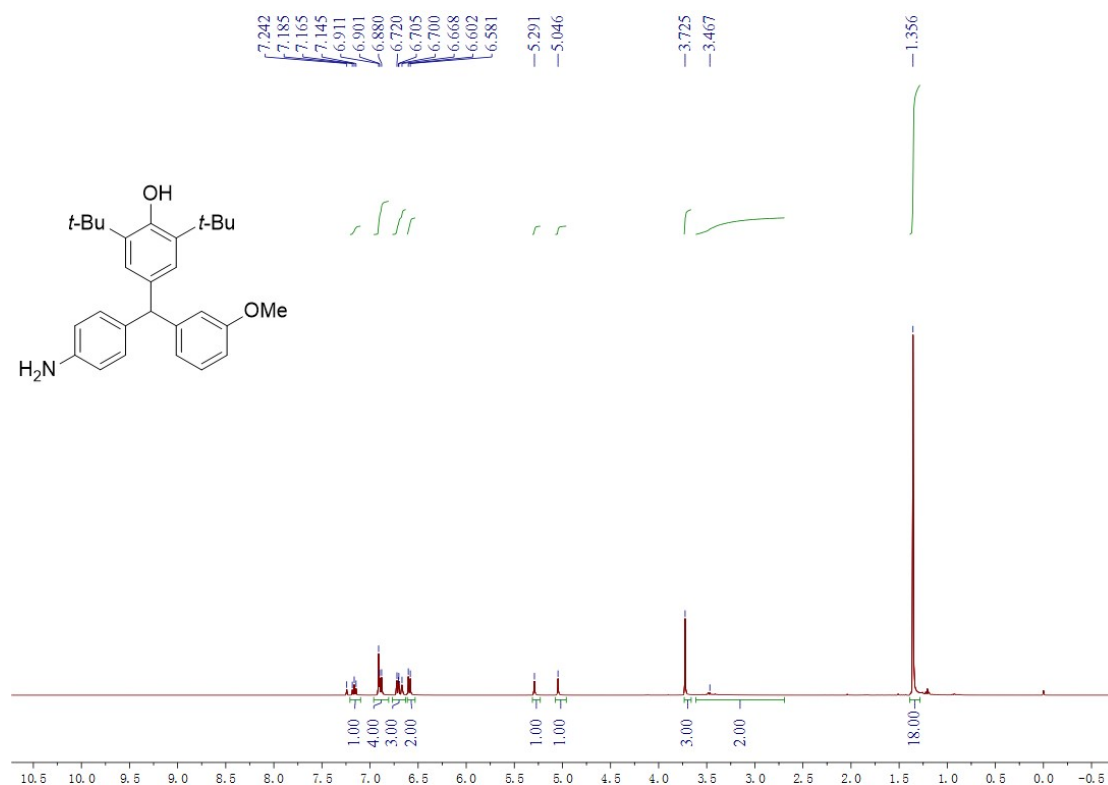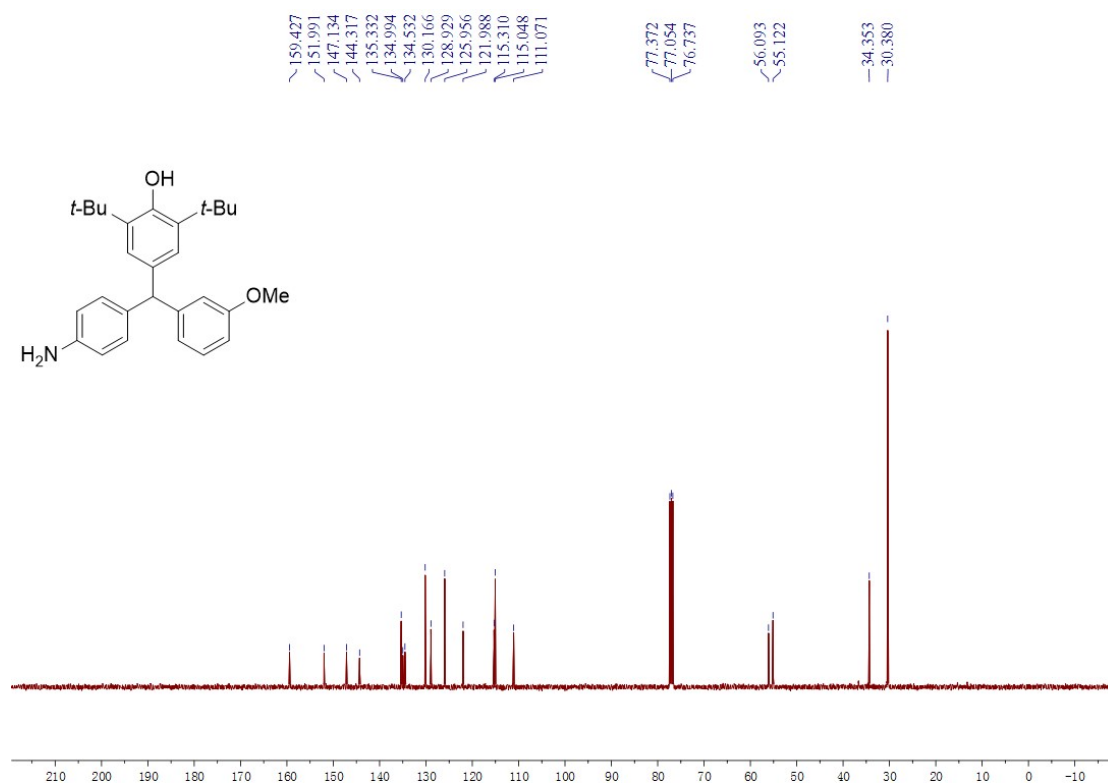

**4-((4-Aminophenyl)(4-isopropoxyphenyl)methyl)-2,6-di-tert-butylphenol (4f)**

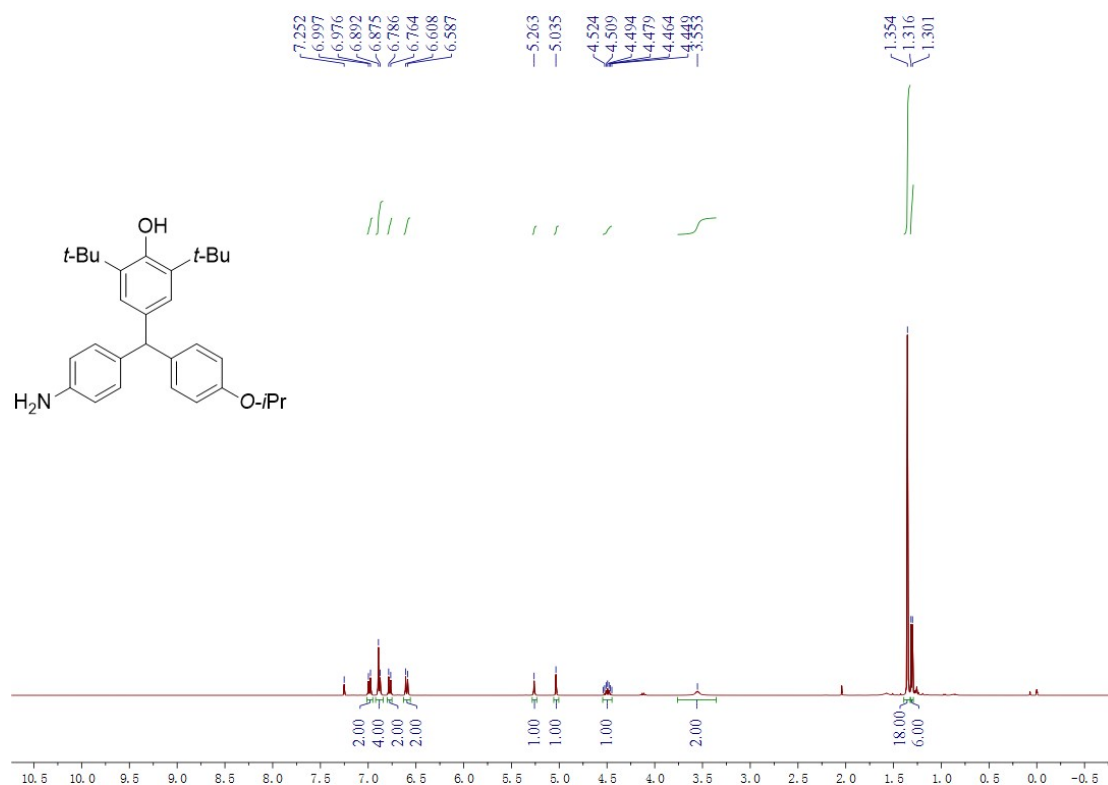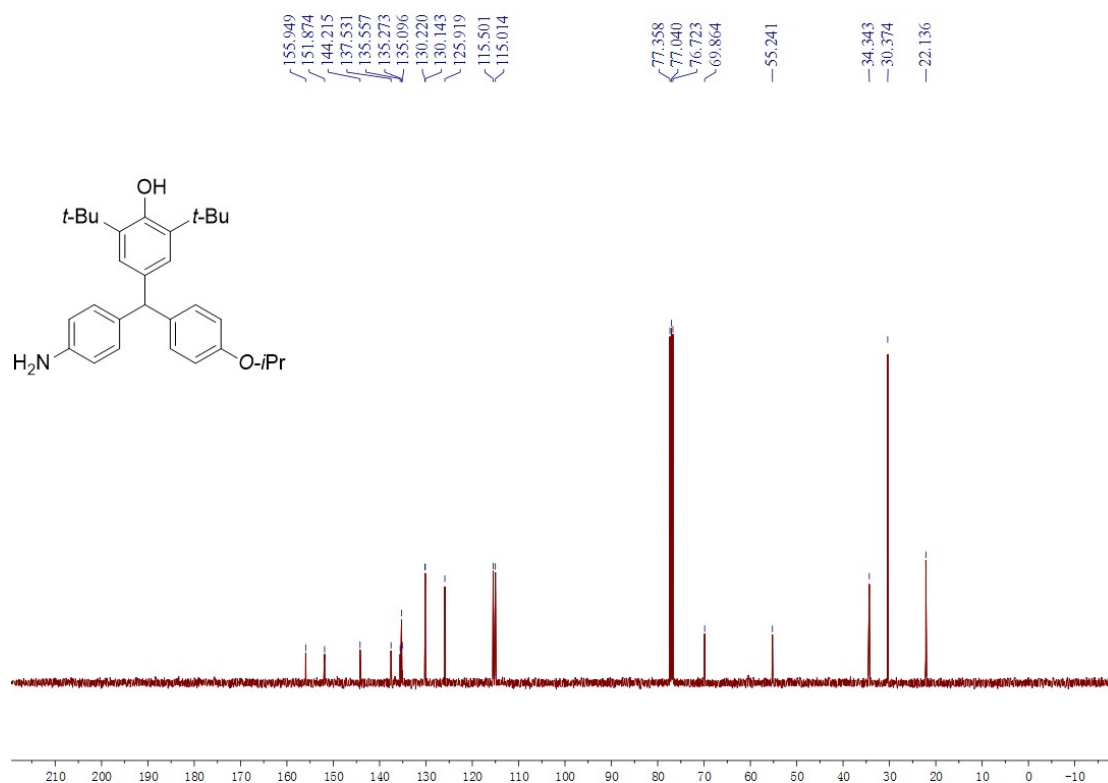



**4-((4-Aminophenyl)(4-(benzyloxy)phenyl)methyl)-2,6-di-tert-butylphenol (4g)**

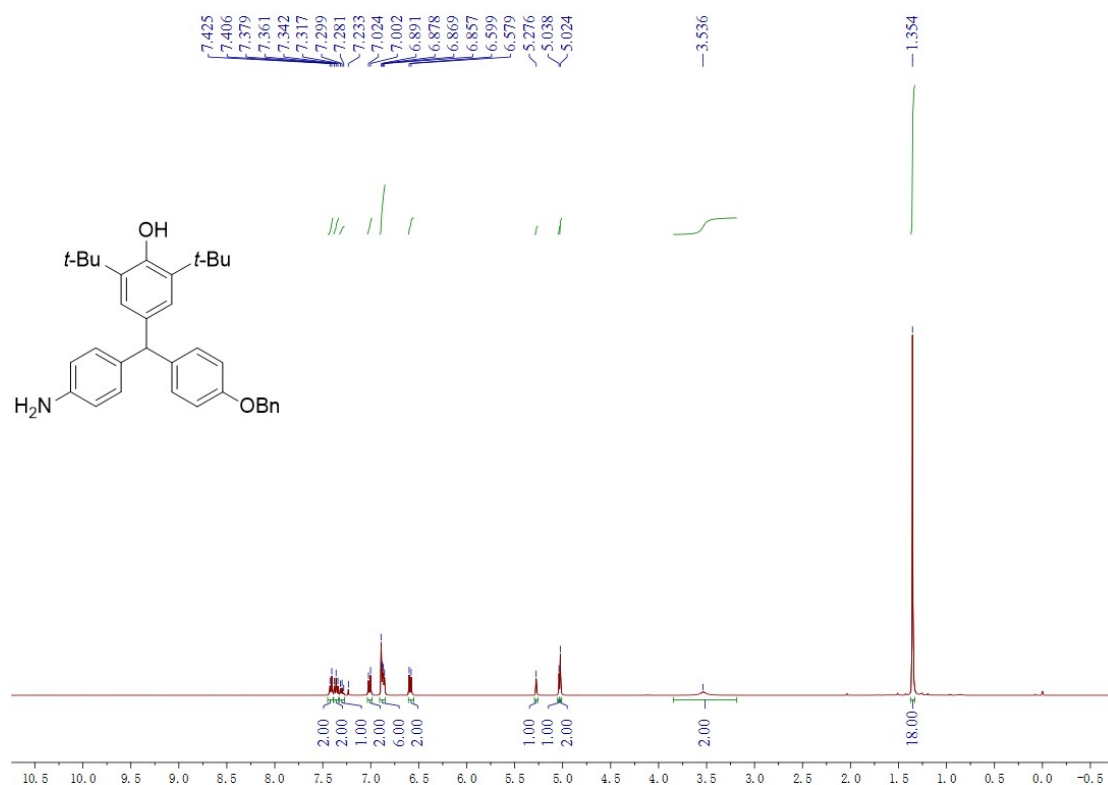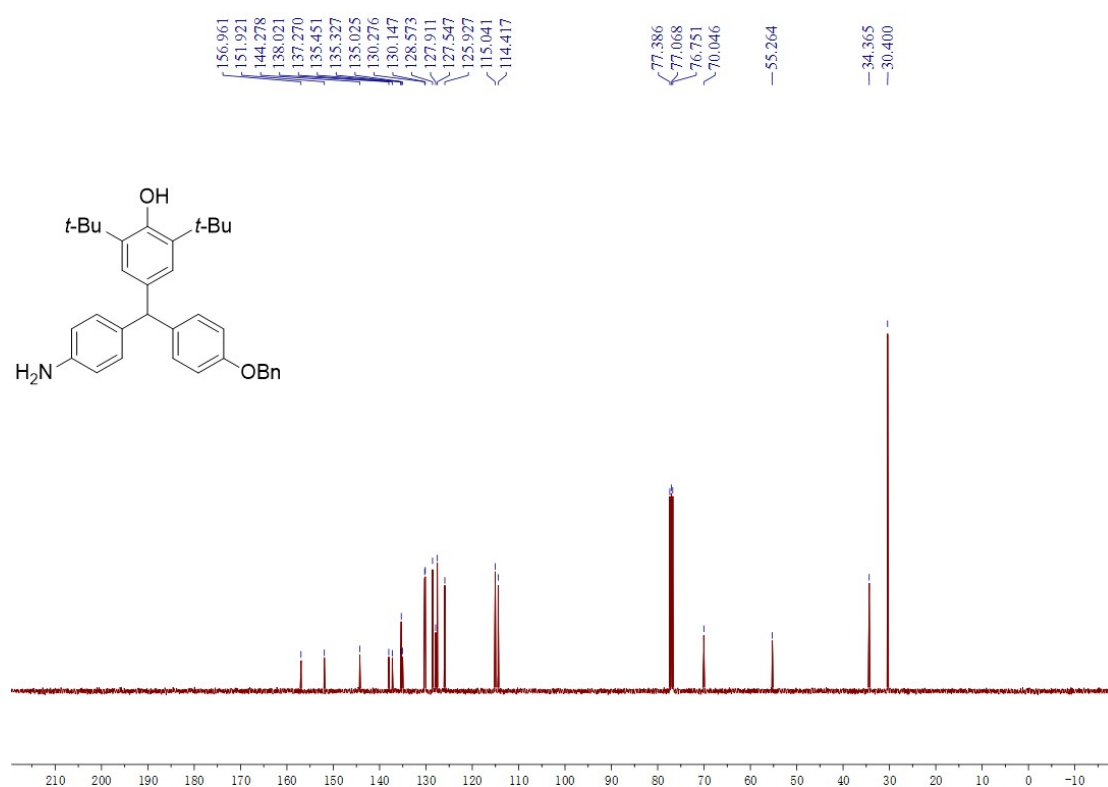

**4-((4-Aminophenyl)(2-hydroxyphenyl)methyl)-2,6-di-tert-butylphenol (4h)**

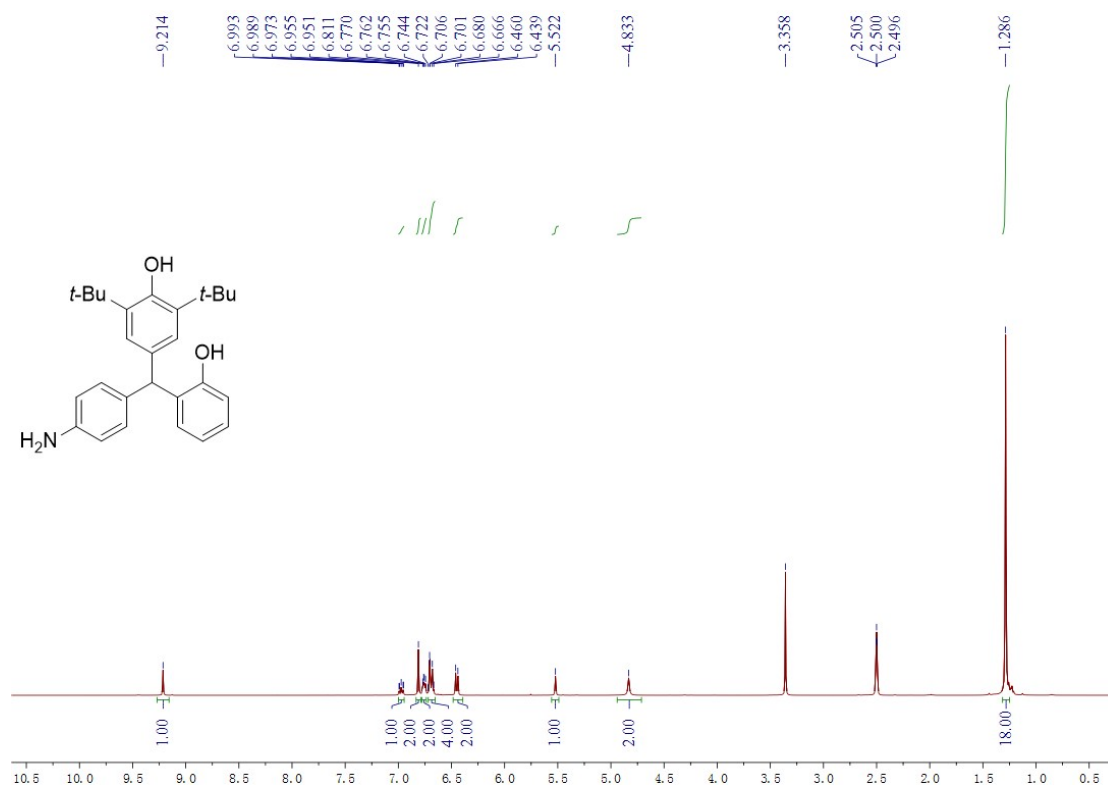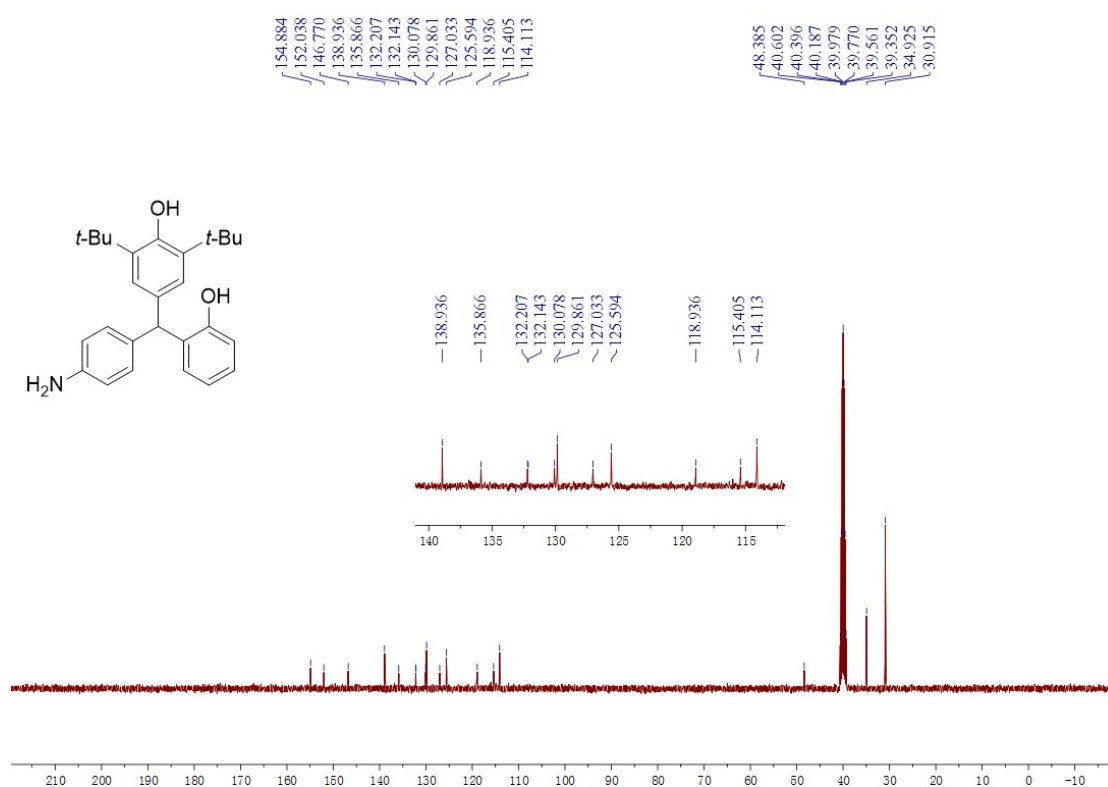

**4-((4-Aminophenyl)(4-hydroxy-3-methoxyphenyl)methyl)-2,6-di-tert-butylphenol (4i)**

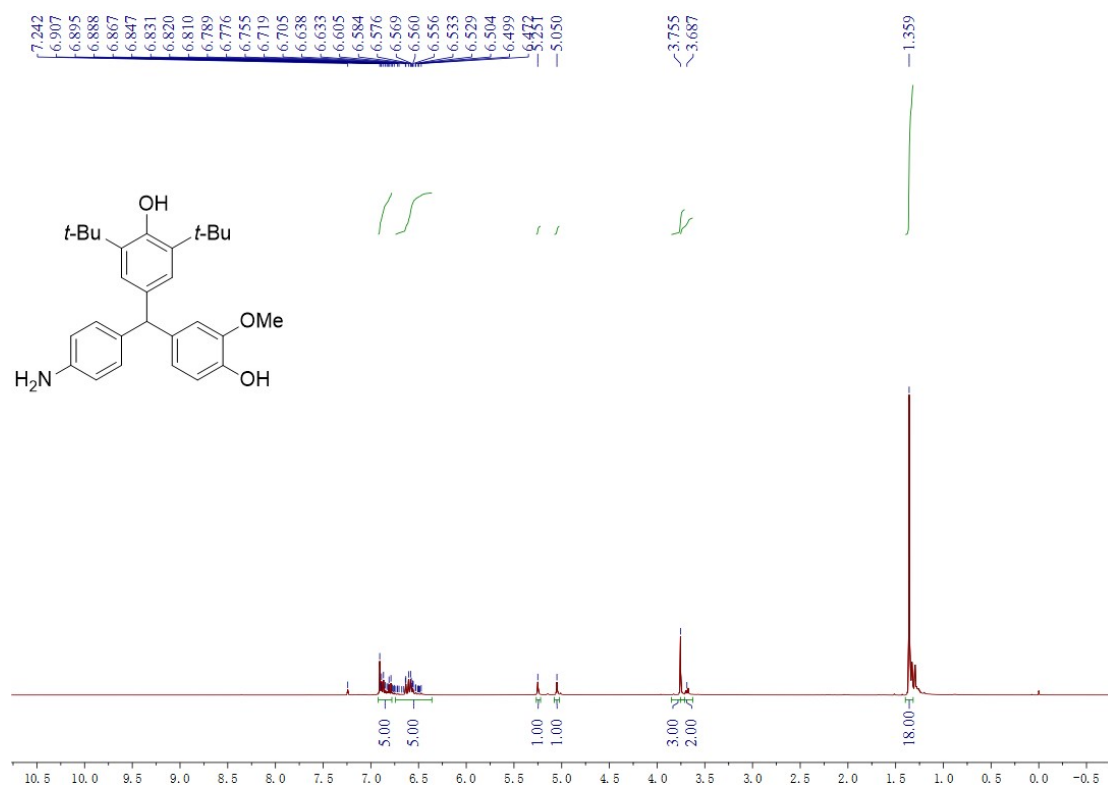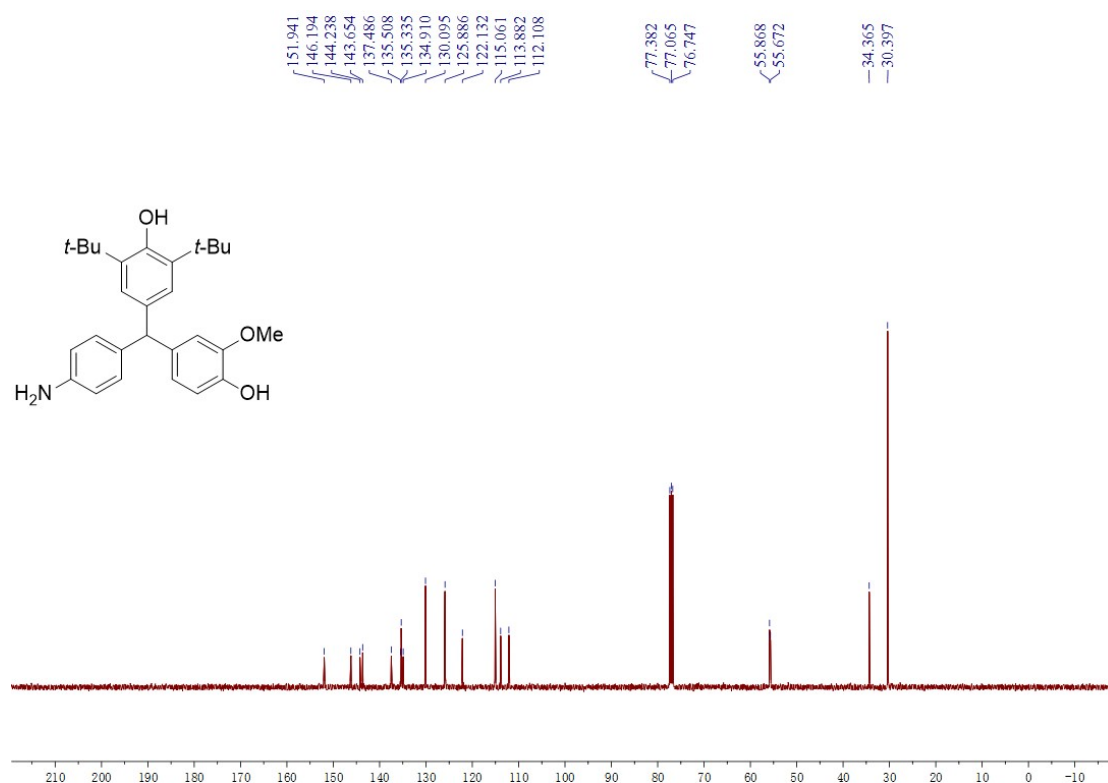

**4-((4-Aminophenyl)(2,5-dimethoxyphenyl)methyl)-2,6-di-tert-butylphenol (4j)**

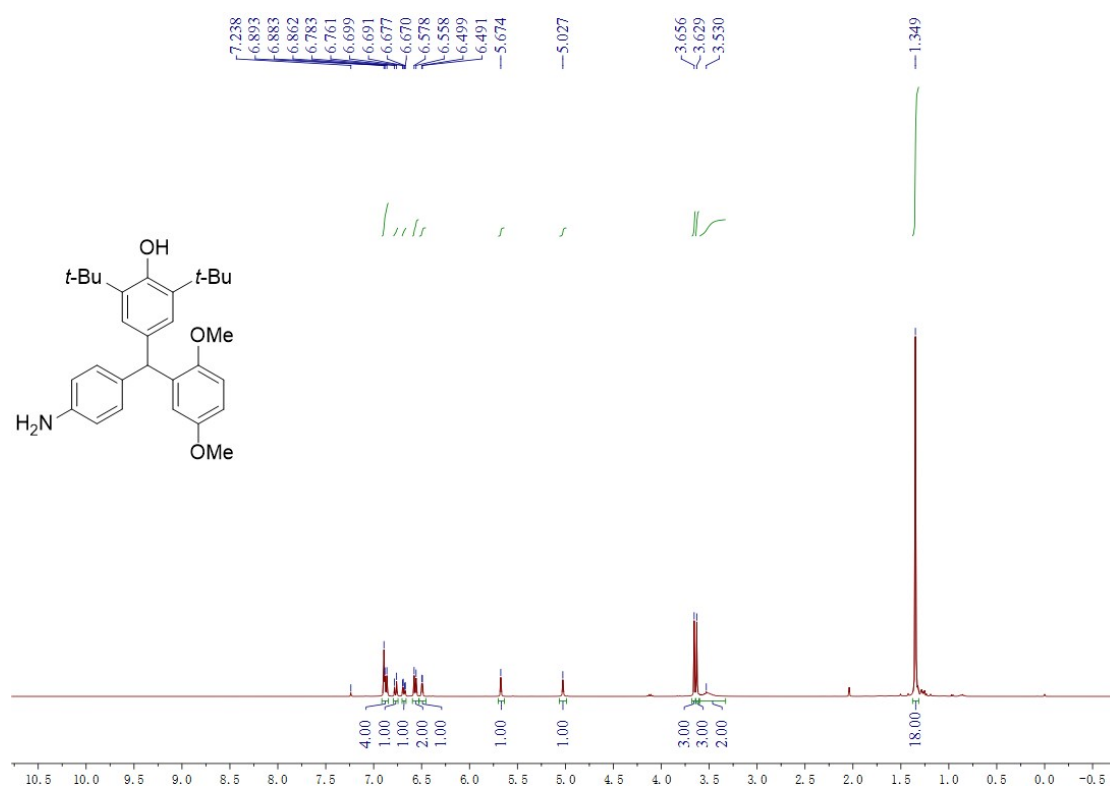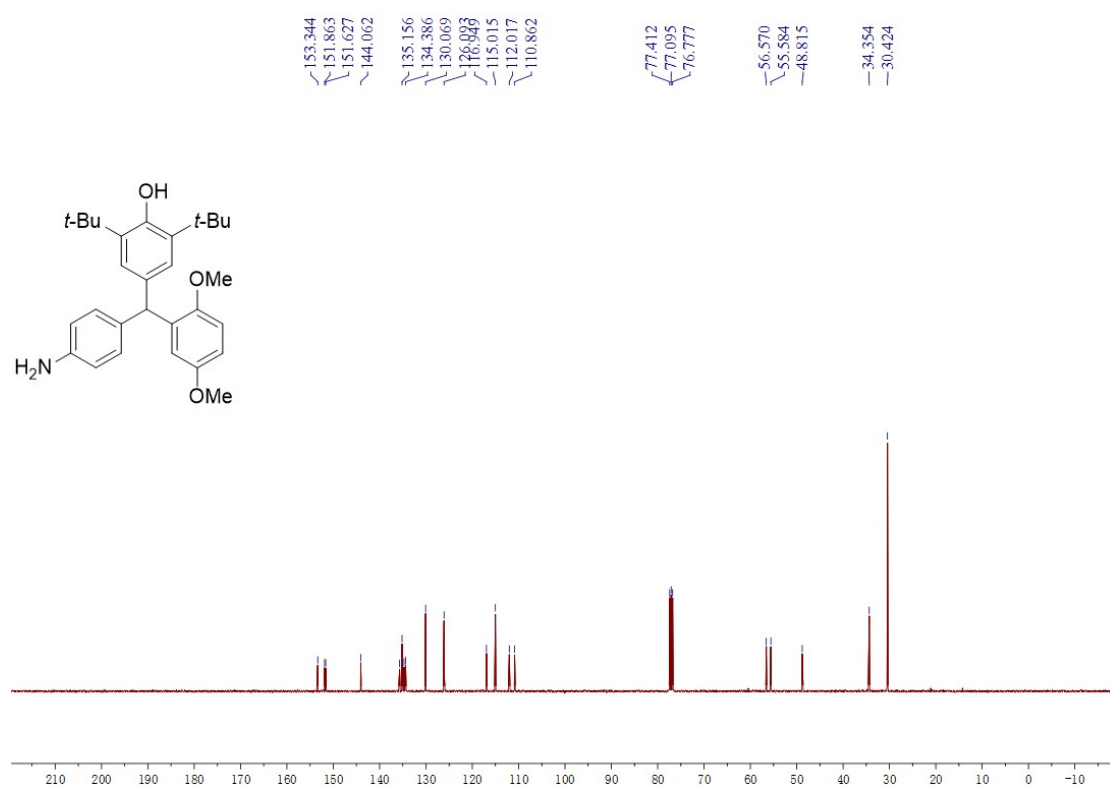

**4-((4-Aminophenyl)(3-nitrophenyl)methyl)-2,6-di-tert-butylphenol (4k)**

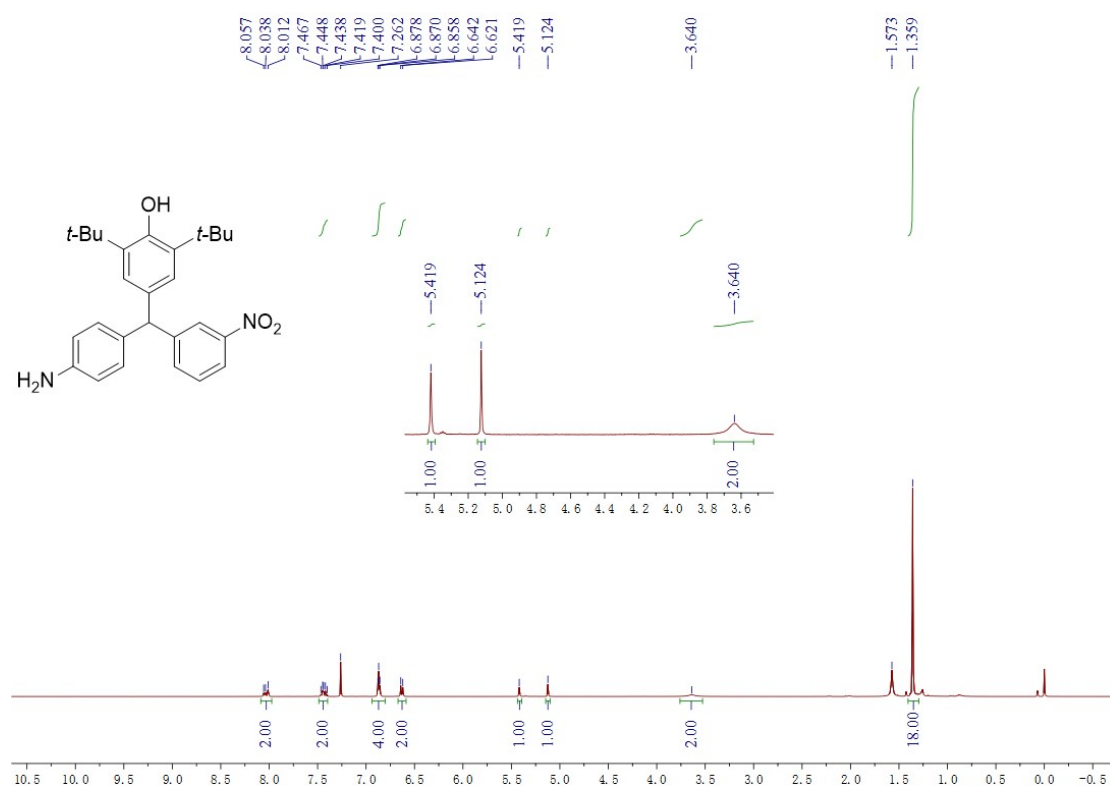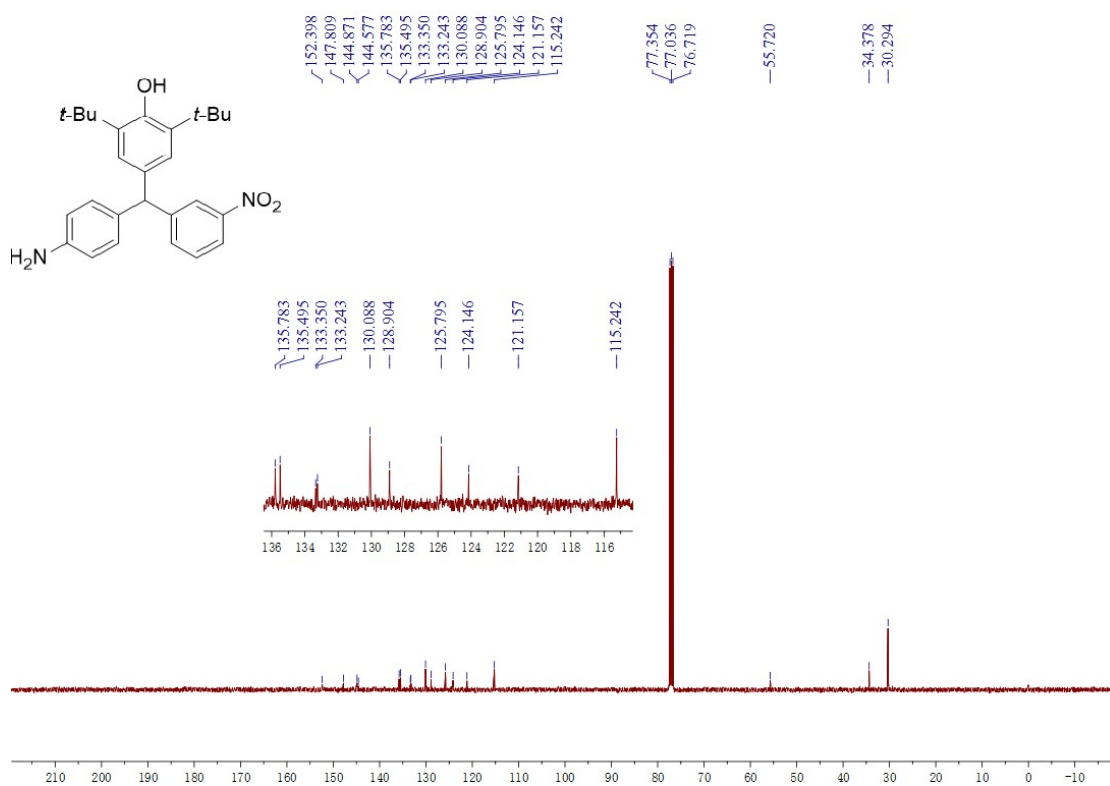

**4-((4-Aminophenyl)(4-(trifluoromethyl)phenyl)methyl)-2,6-di-tert-butylphenol (4l)**

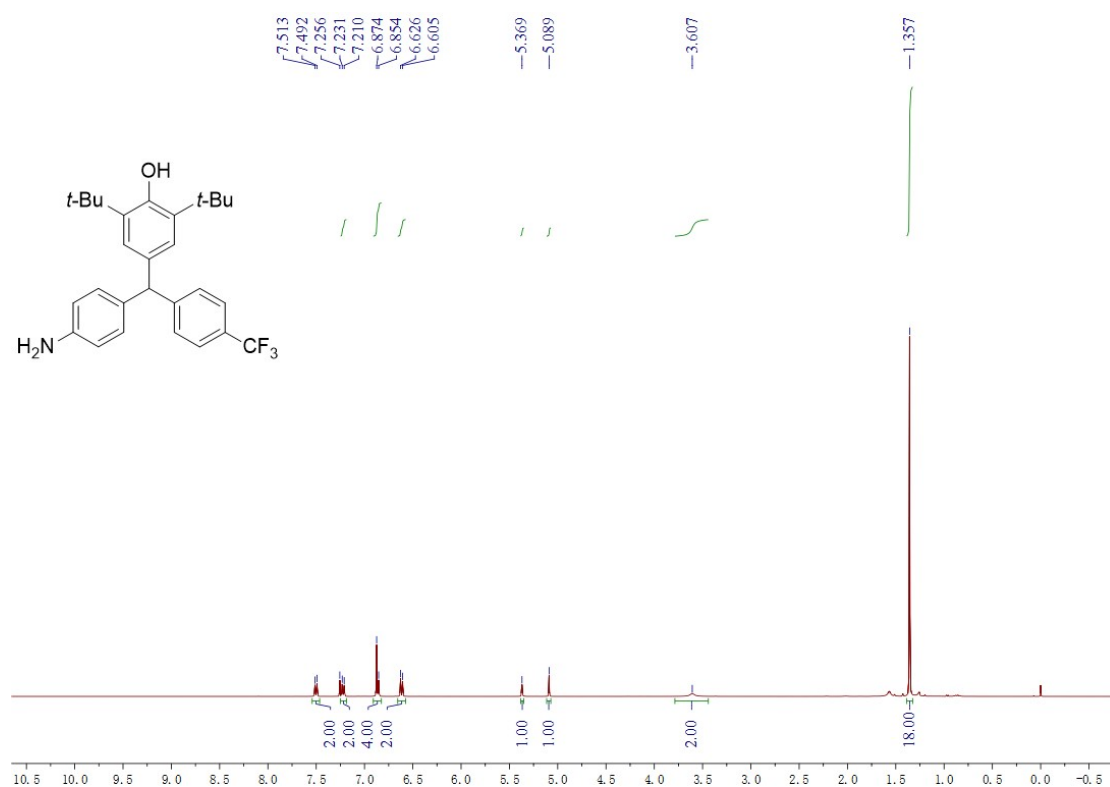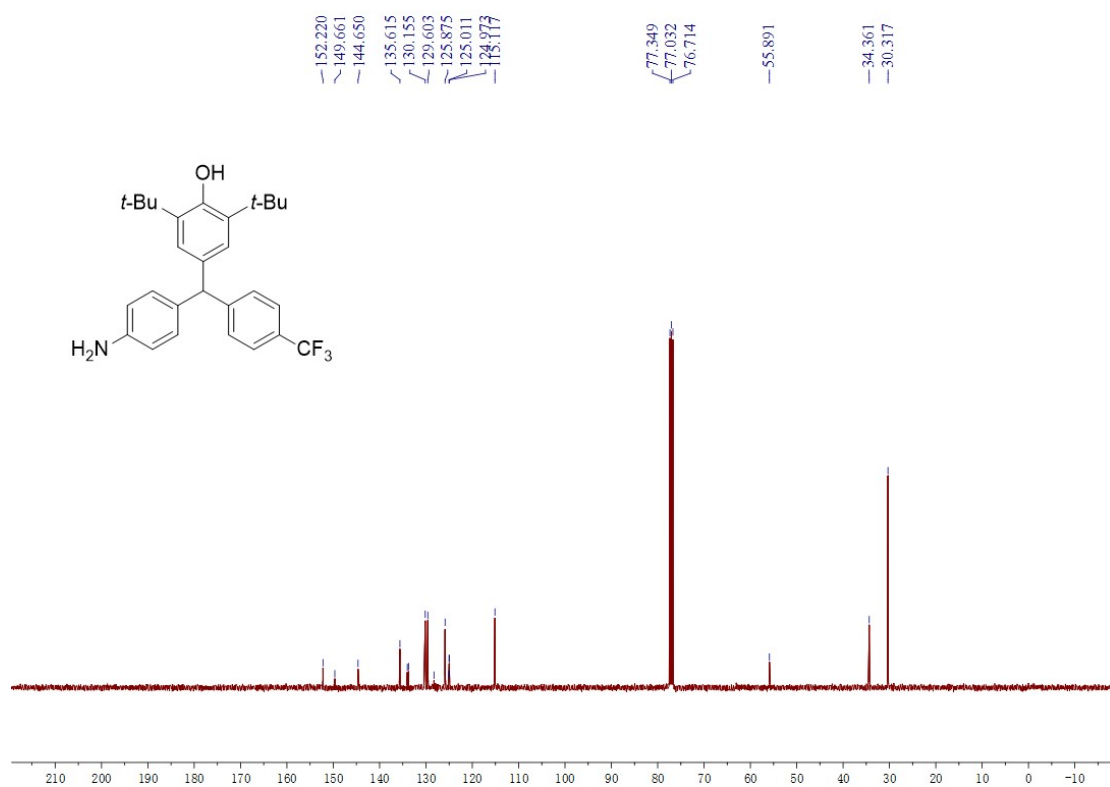

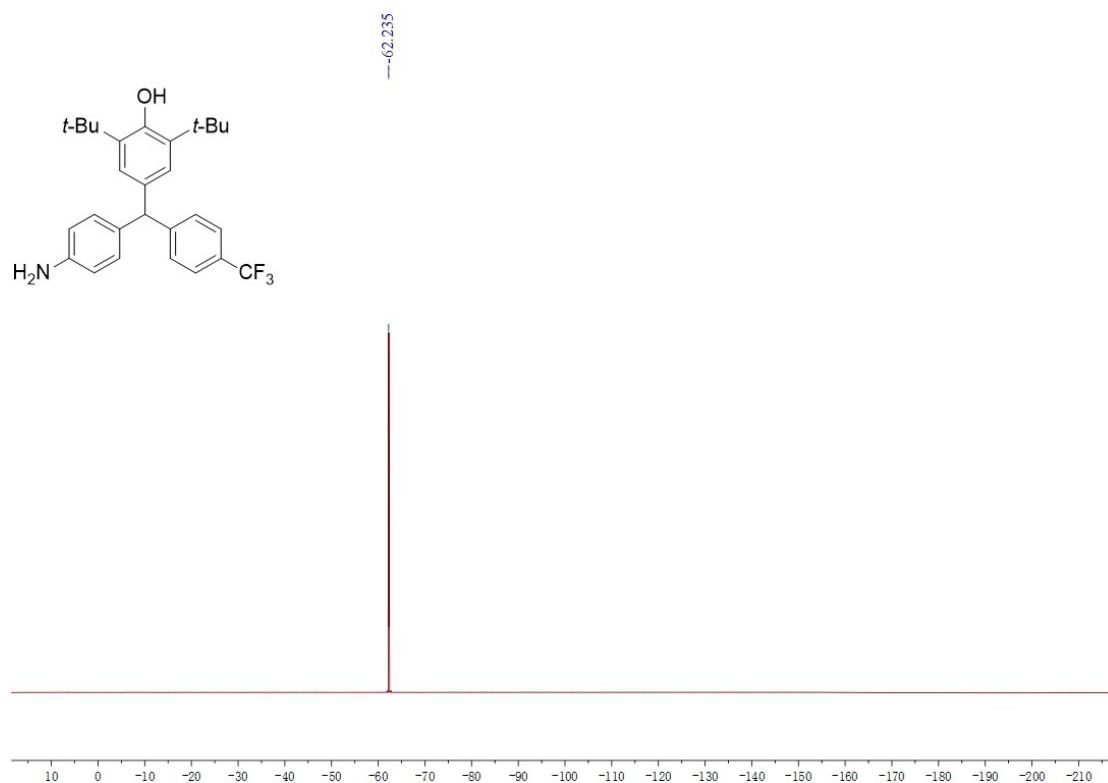

**4-((4-Aminophenyl)(3-fluorophenyl)methyl)-2,6-di-tert-butylphenol (4m)**

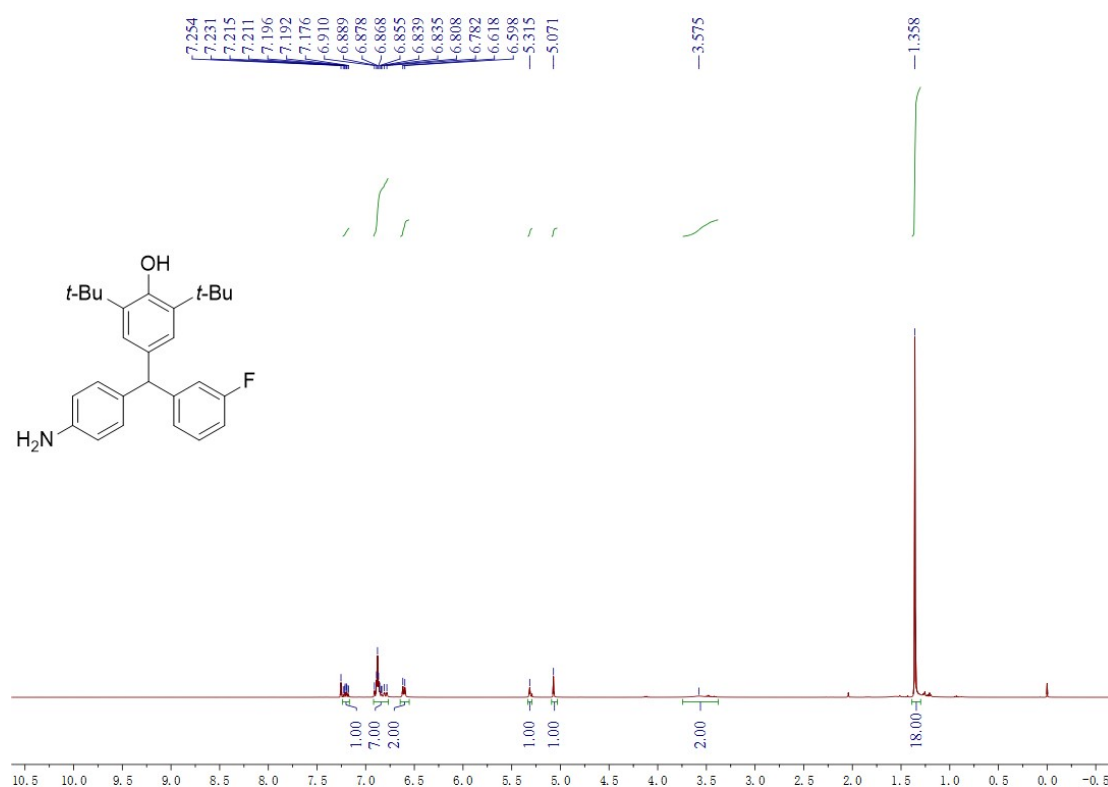

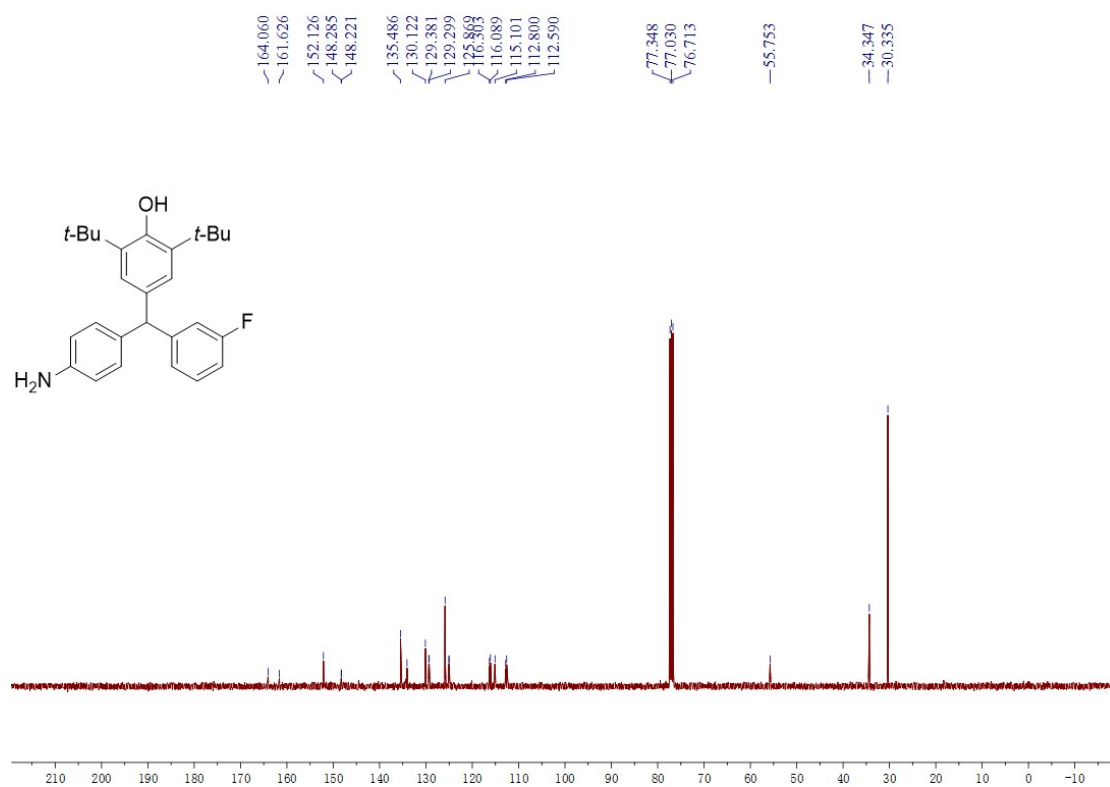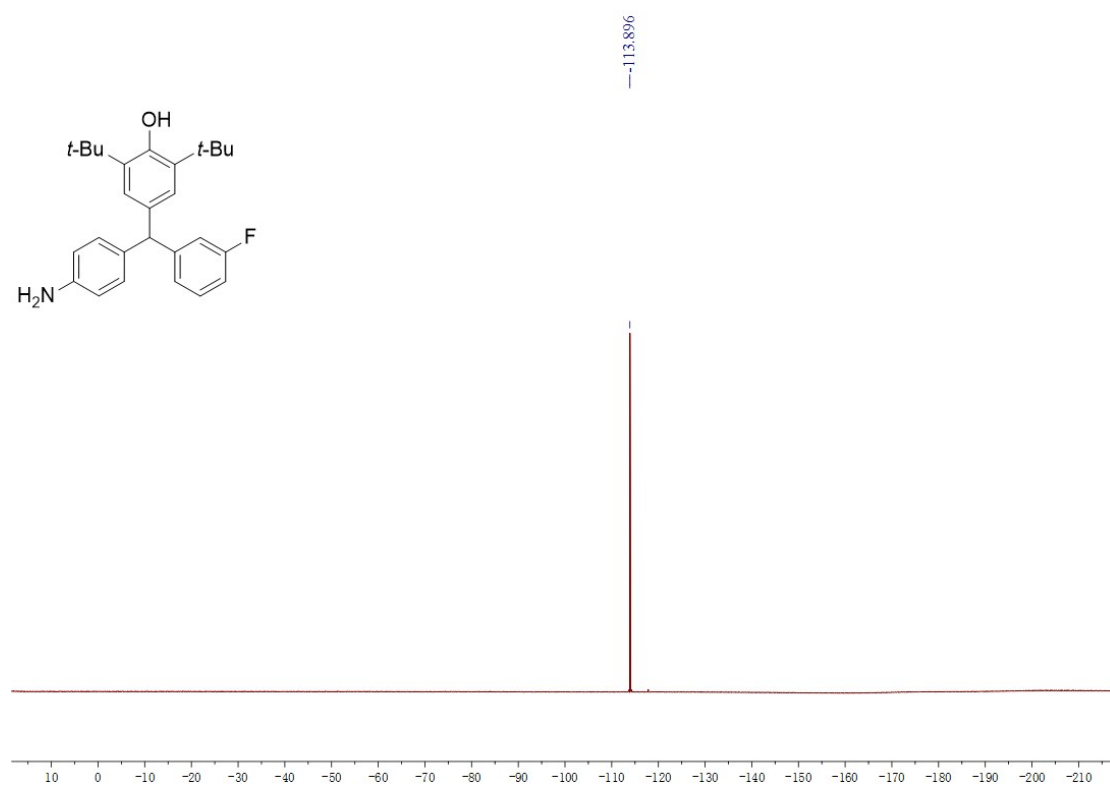

**4-((4-Aminophenyl)(2-fluorophenyl)methyl)-2,6-di-tert-butylphenol (4n)**



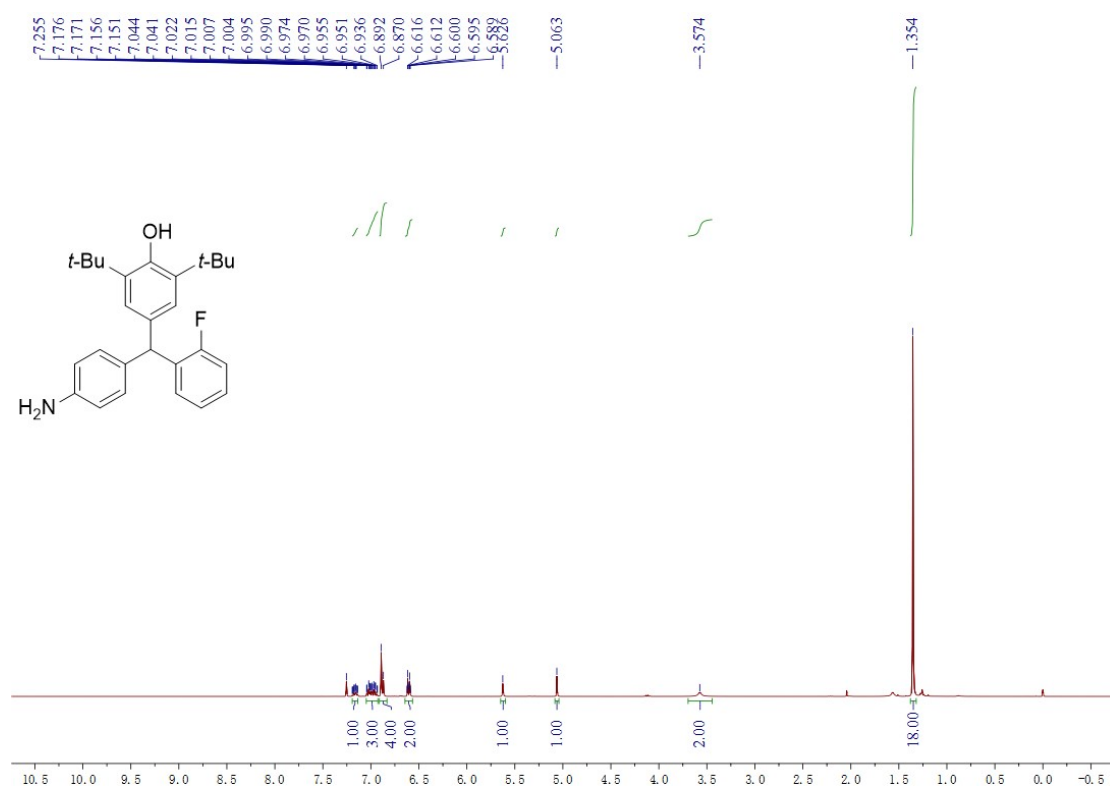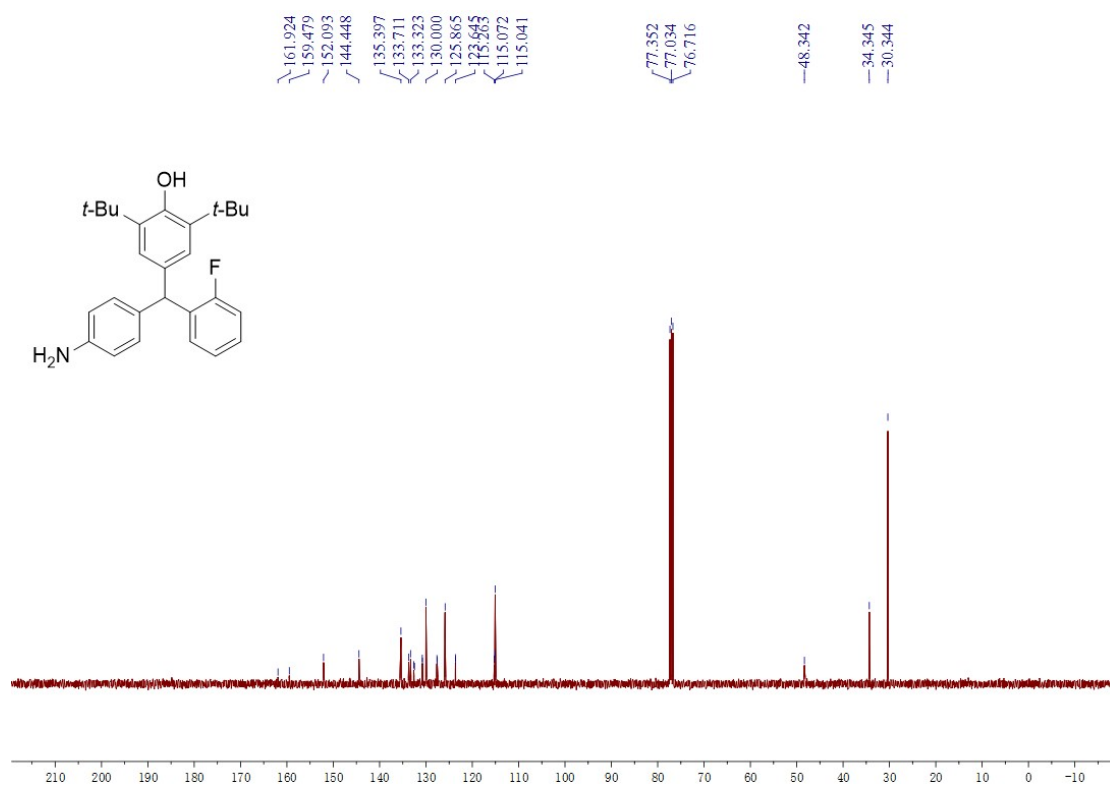

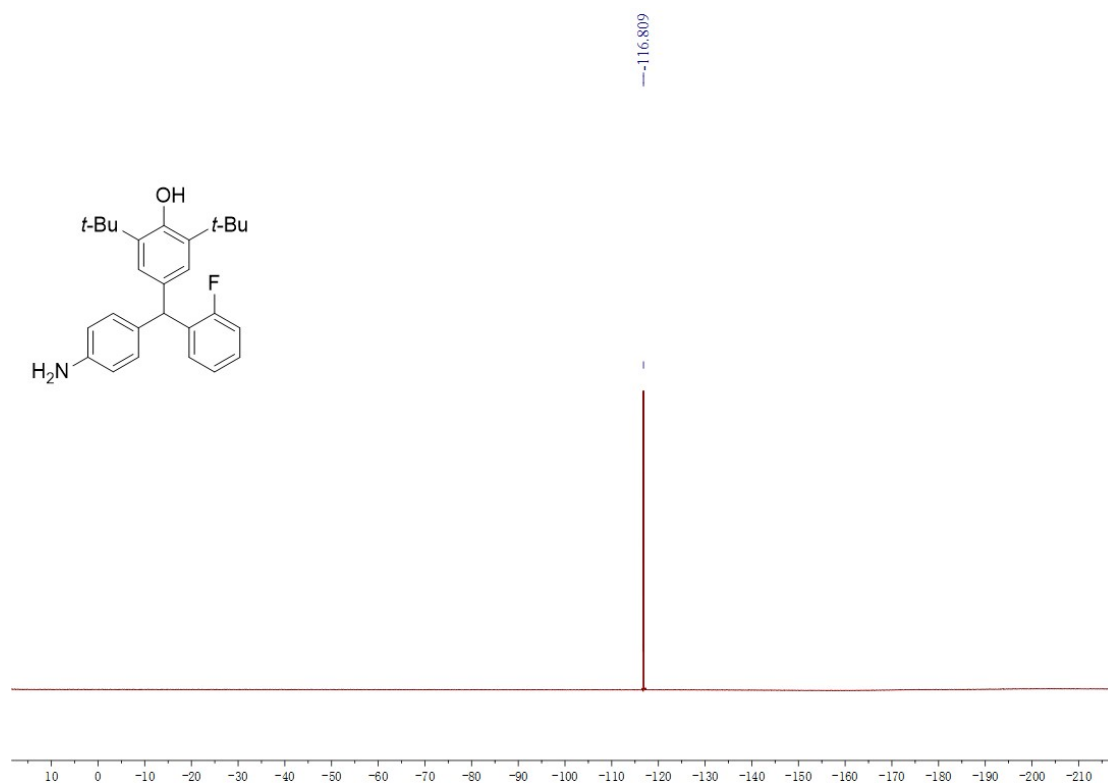

**4-((4-Aminophenyl)(4-fluorophenyl)methyl)-2,6-di-tert-butylphenol (4o)**

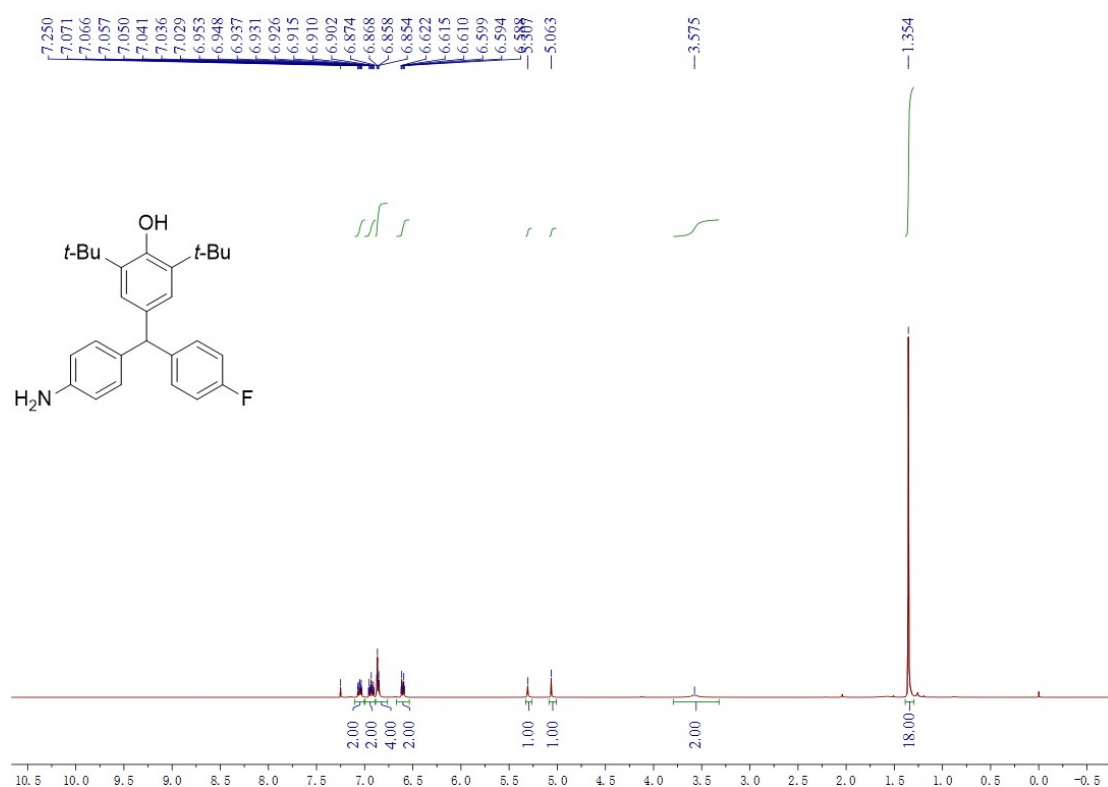

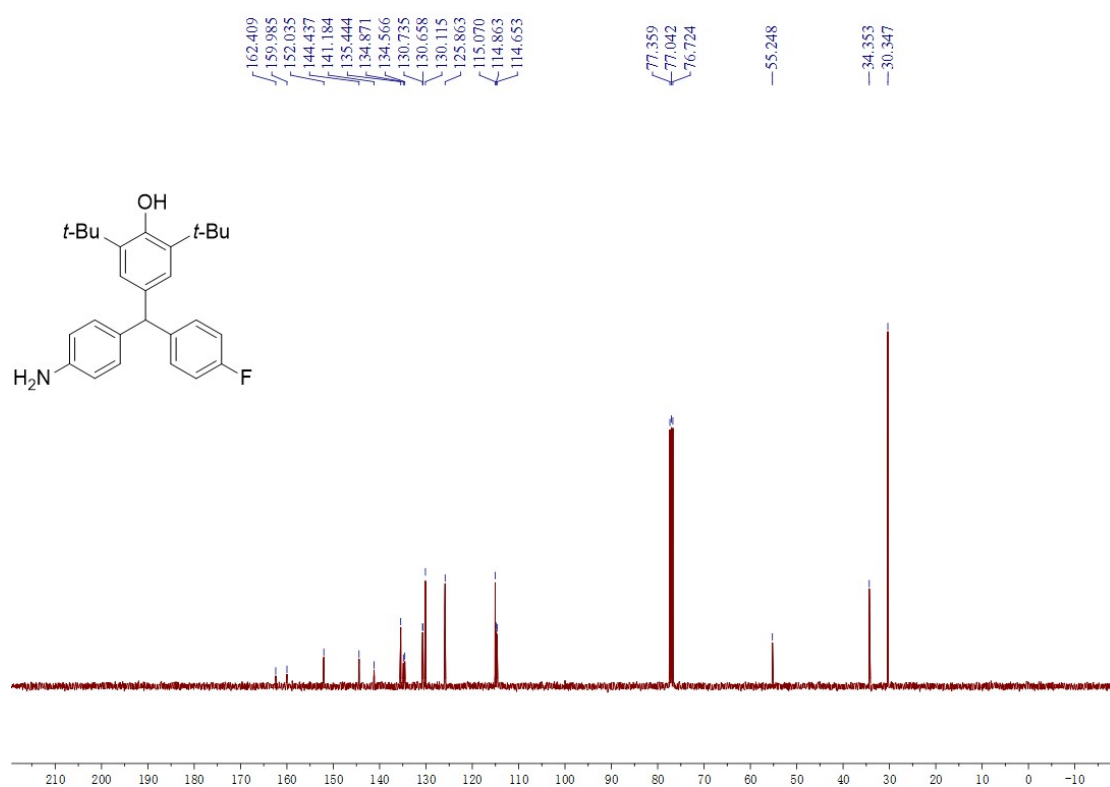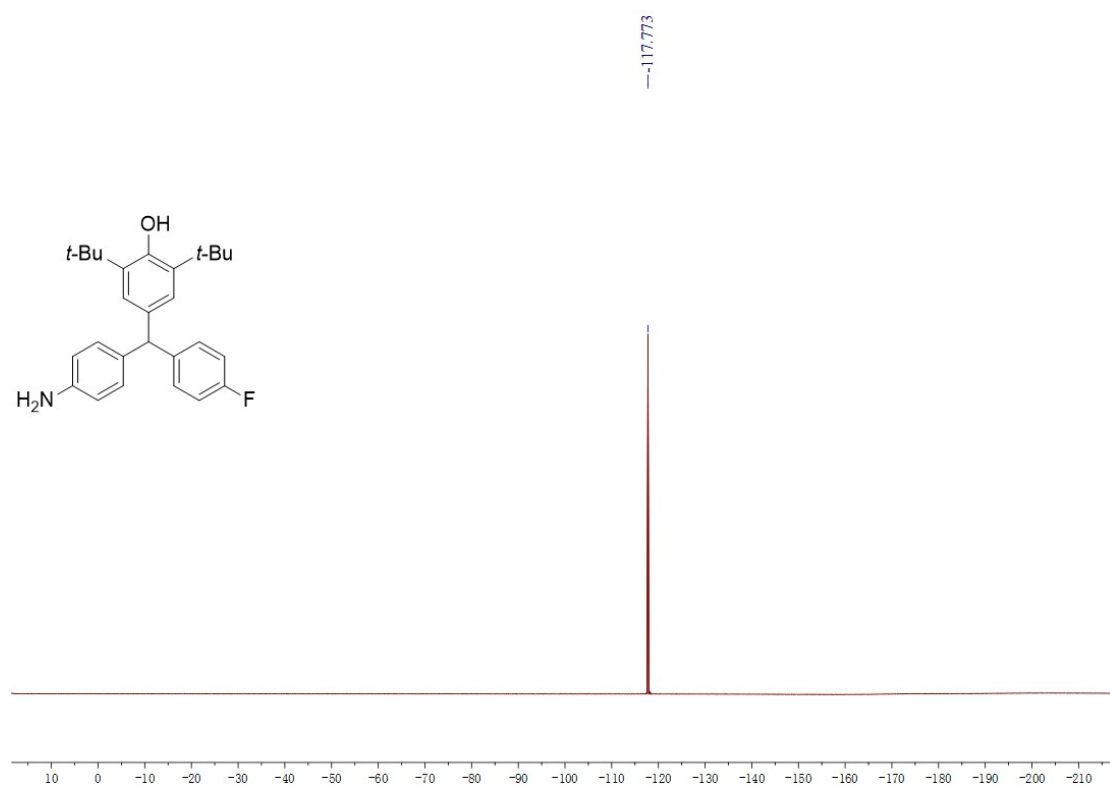

**4-((4-Aminophenyl)(3-bromophenyl)methyl)-2,6-di-tert-butylphenol (4p)**

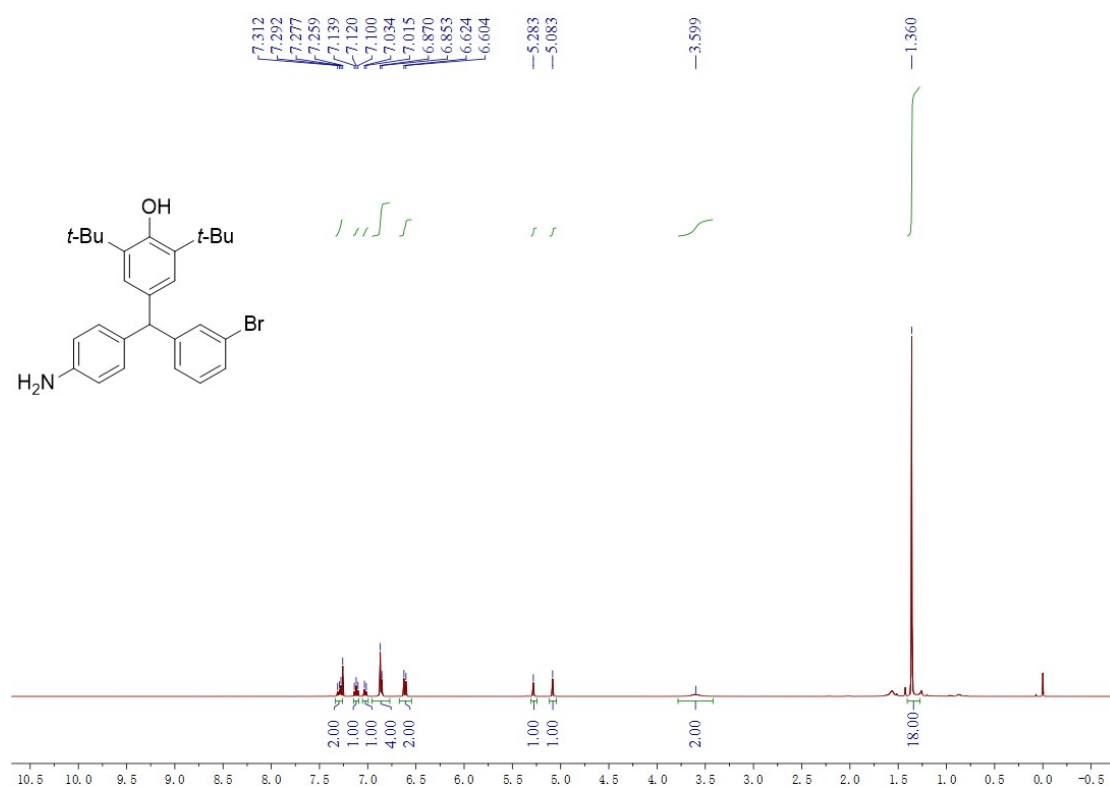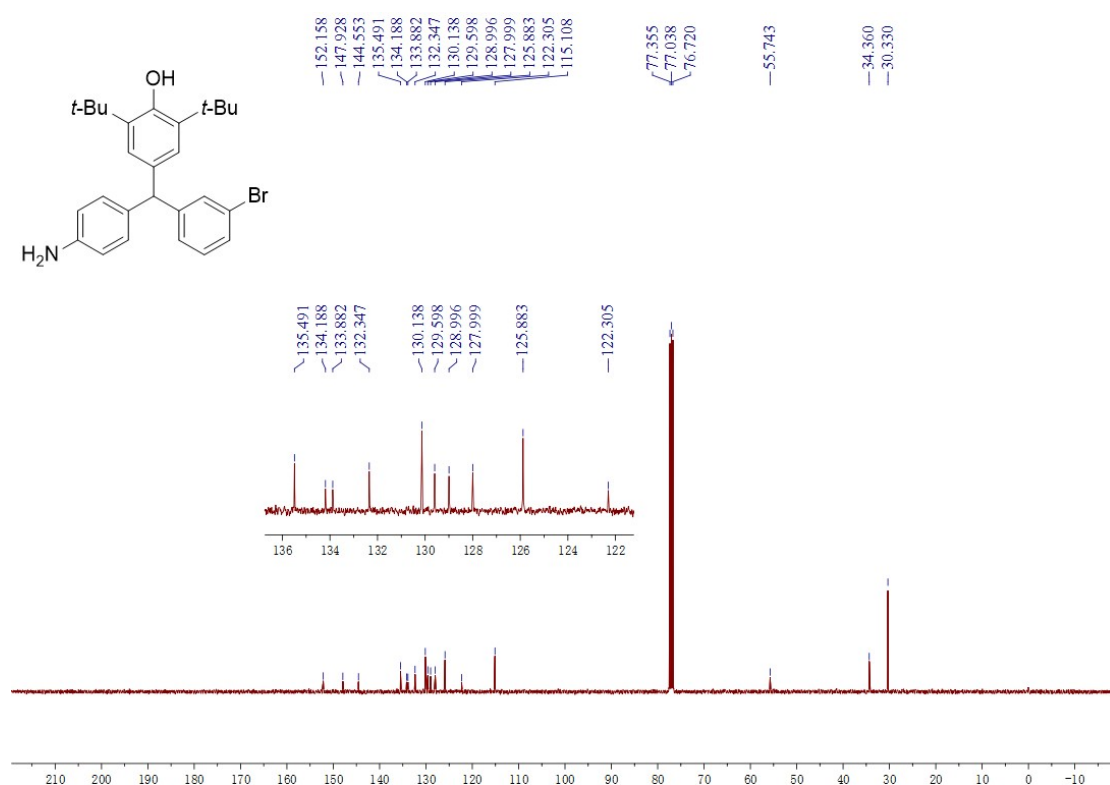

**4-((4-Aminophenyl)(2-bromophenyl)methyl)-2,6-di-tert-butylphenol (4q)**

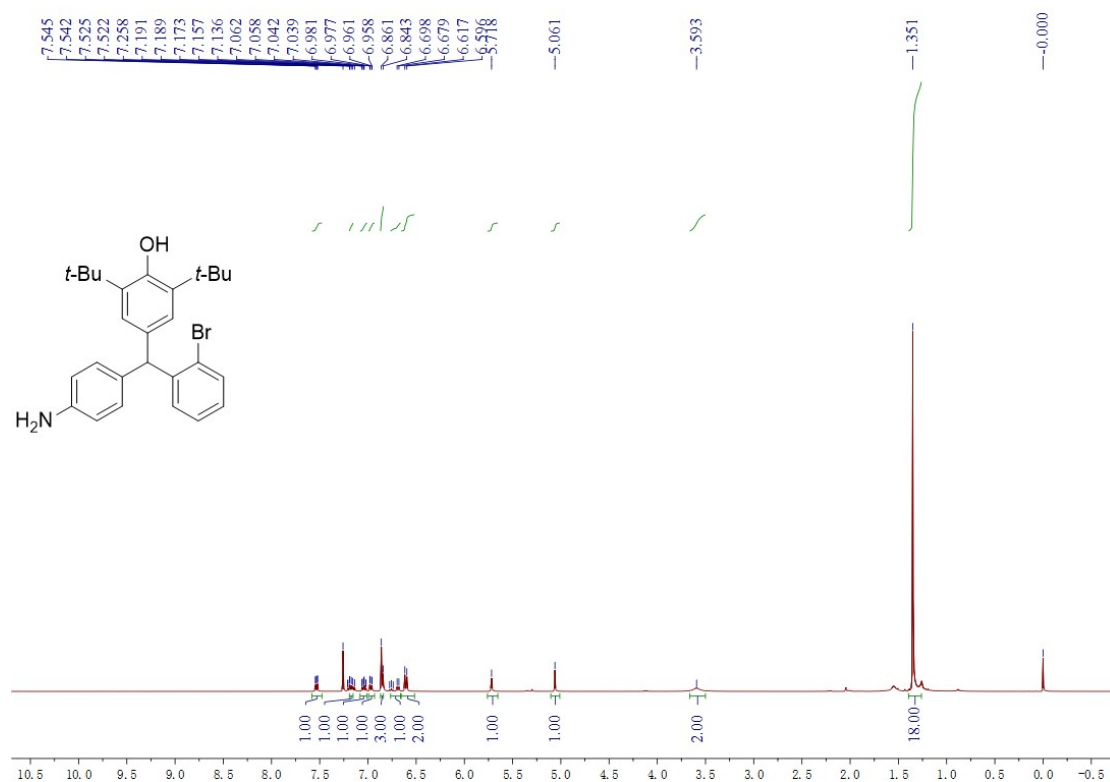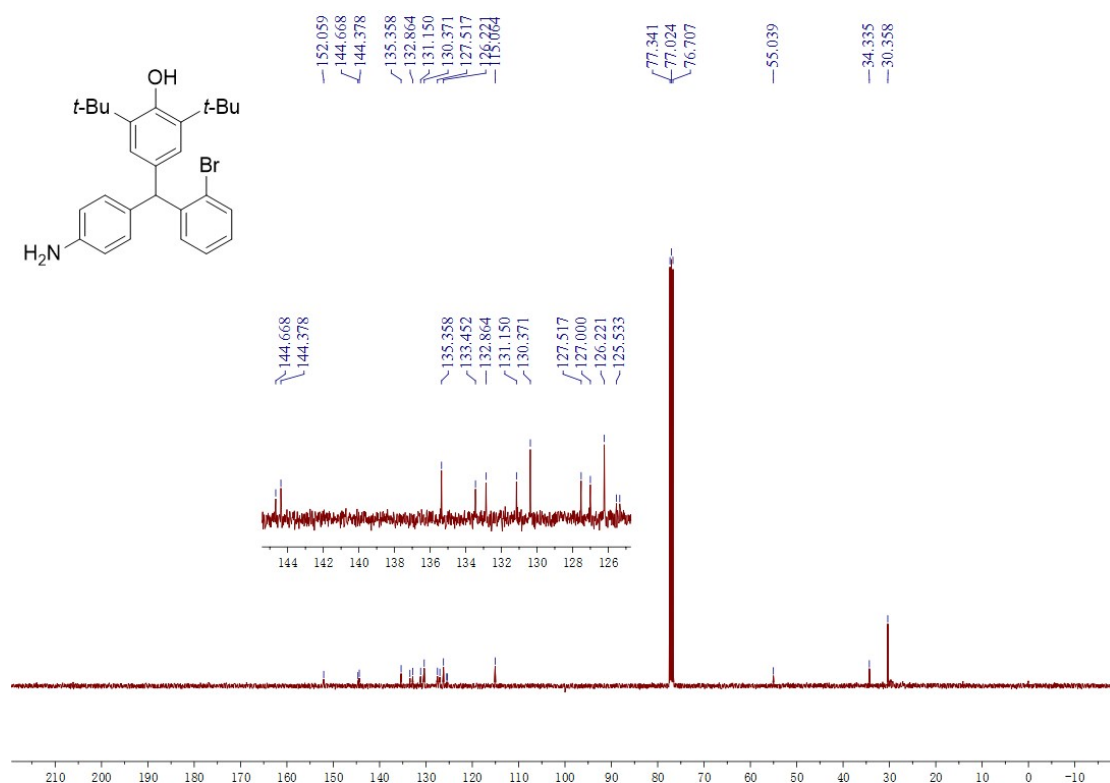

**4-((4-Aminophenyl)(4-bromophenyl)methyl)-2,6-di-tert-butylphenol (4r)**

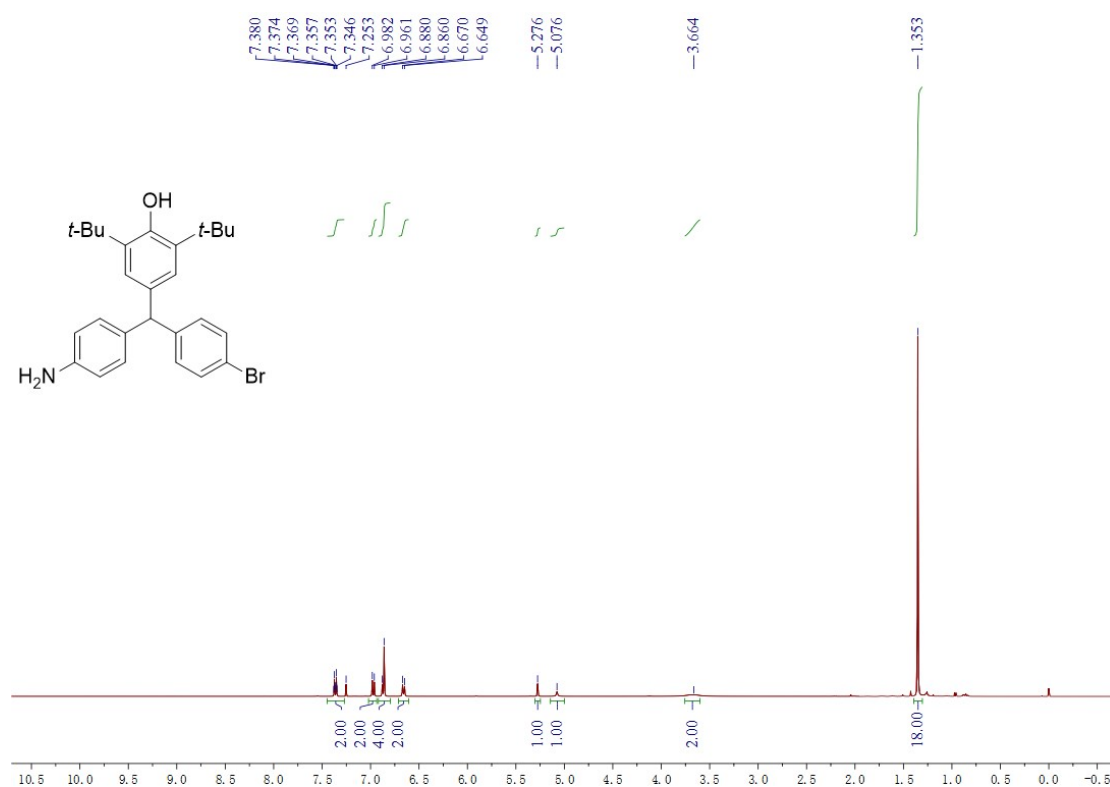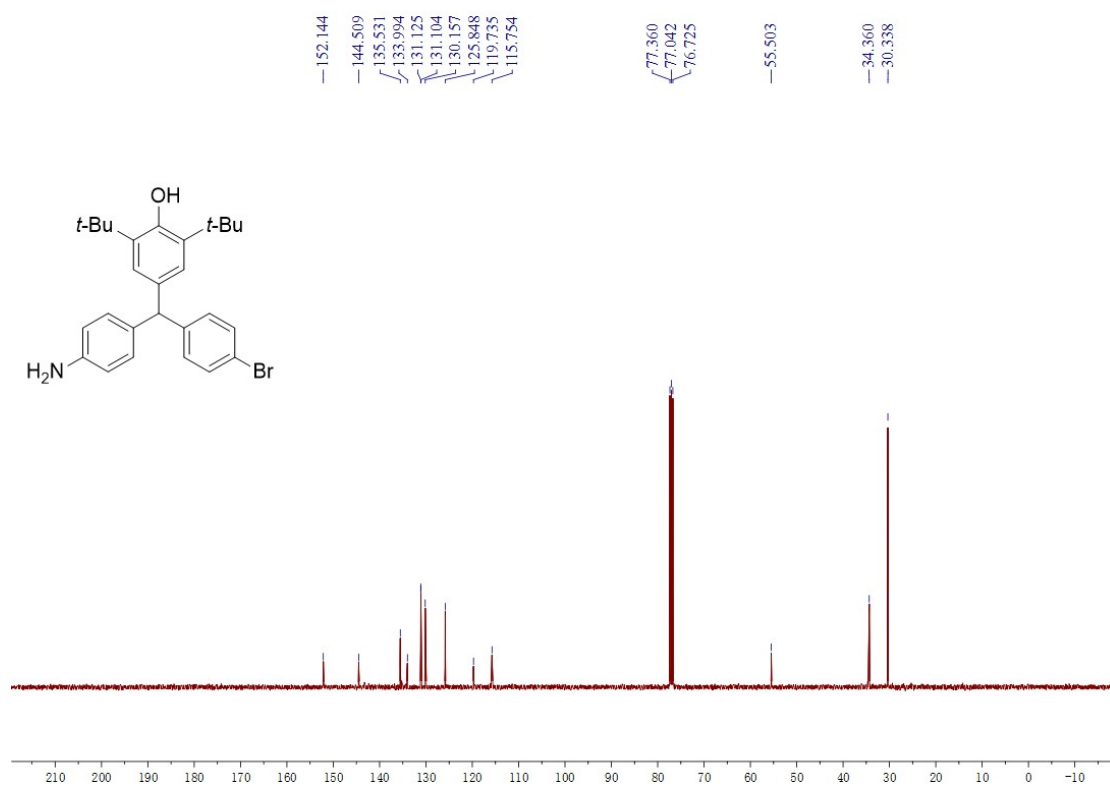

**4-((4-Aminophenyl)(3,5-di-tert-butyl-4-hydroxyphenyl)methyl)benzonitrile (4s)**

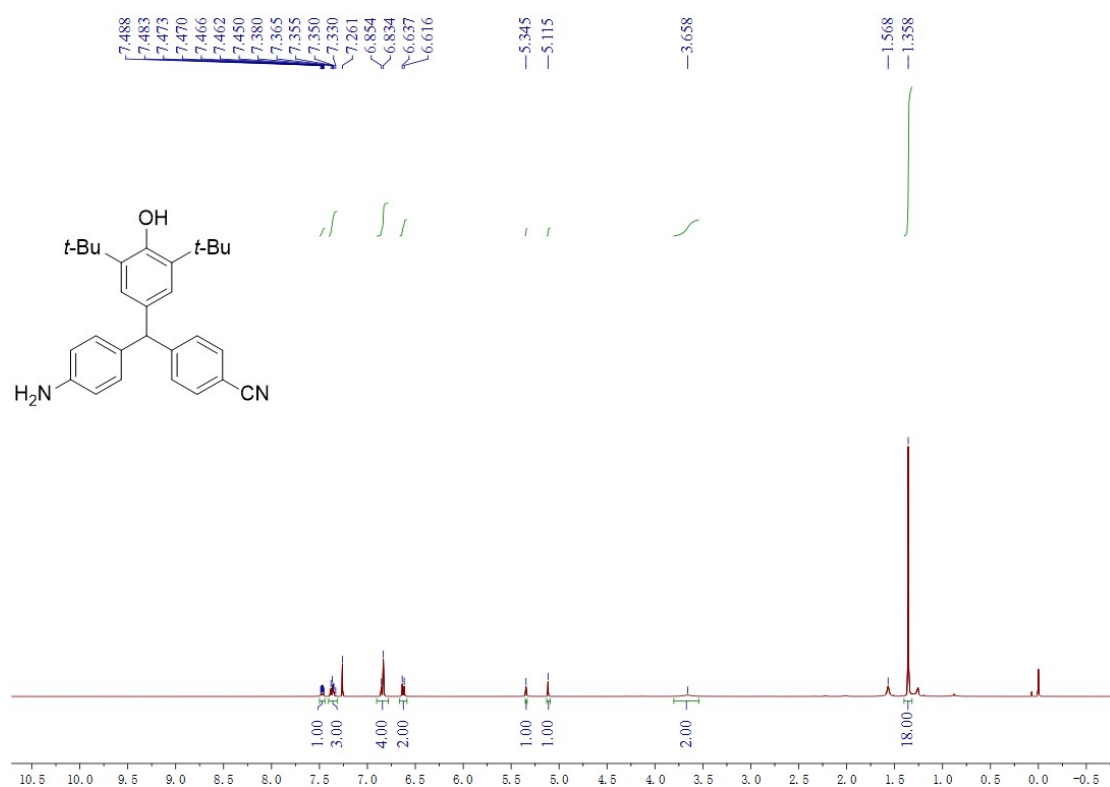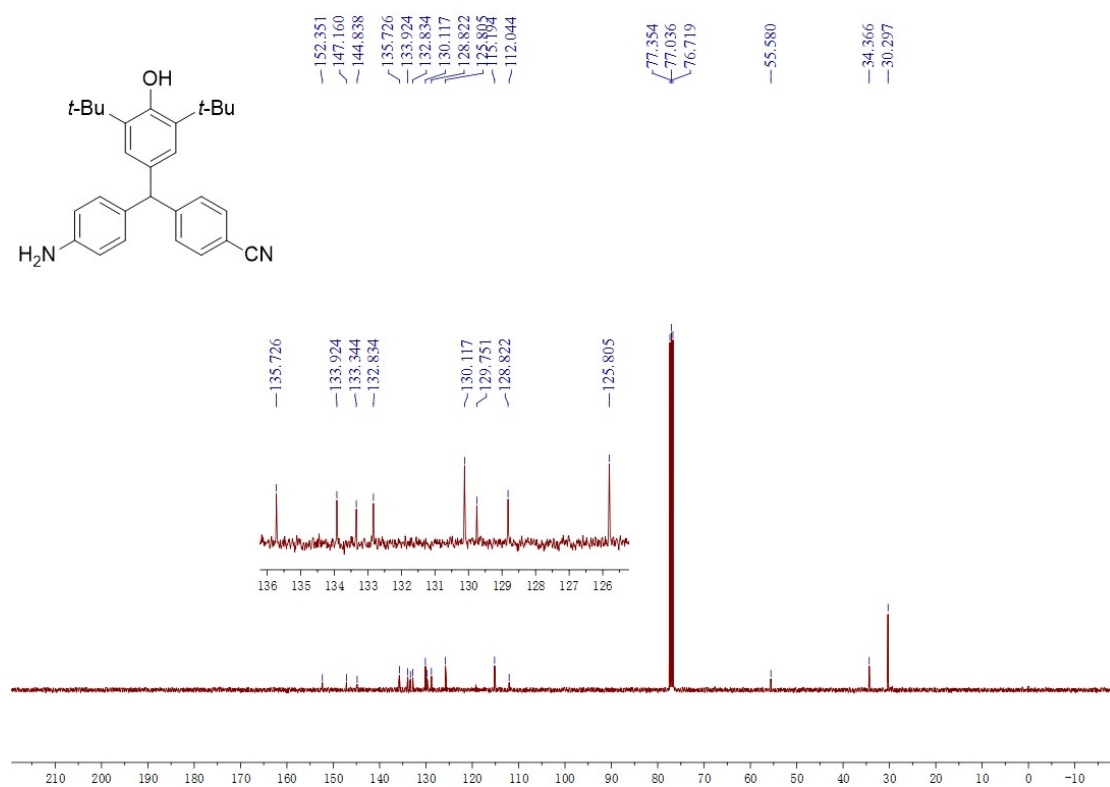

**3-((4-Aminophenyl)(3,5-di-tert-butyl-4-hydroxyphenyl)methyl)benzonitrile (4t)**

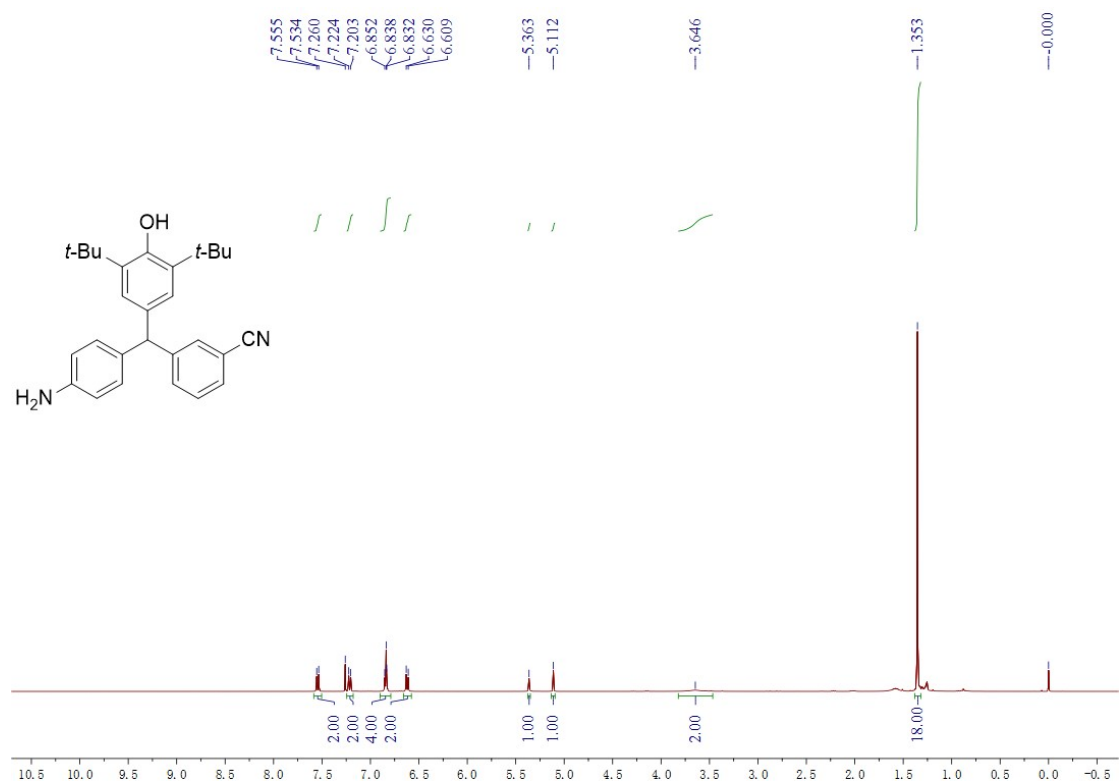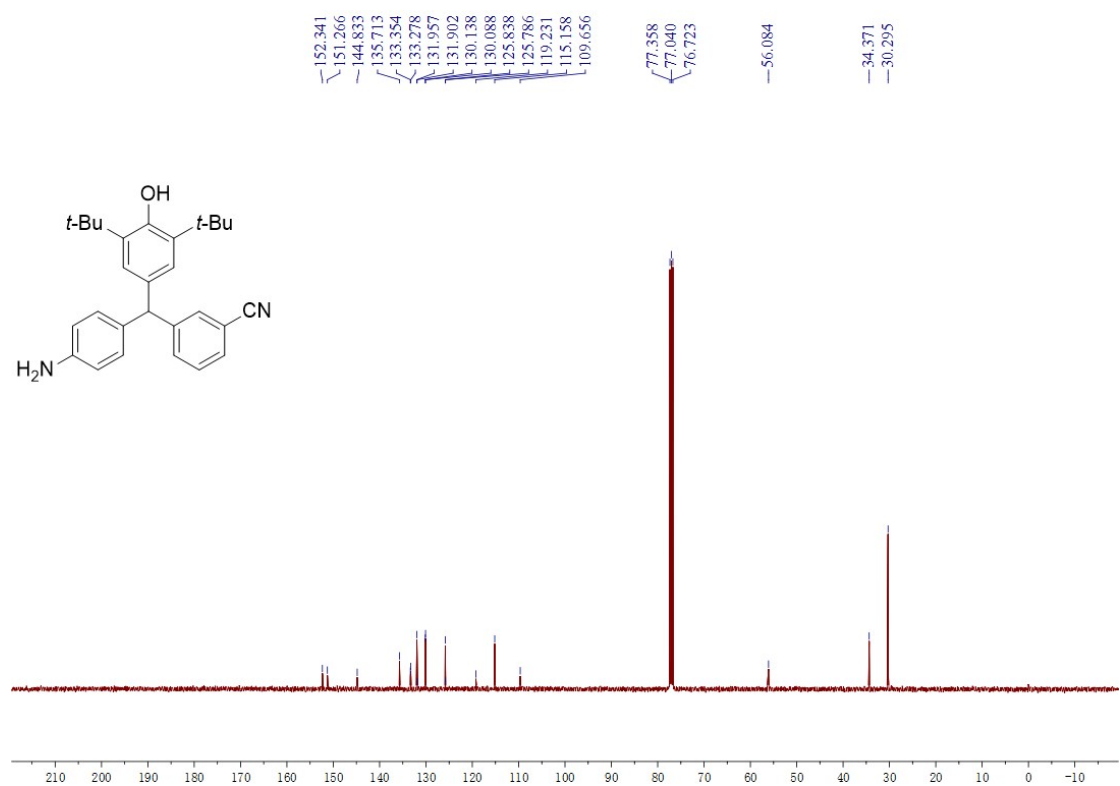

**4-((4-Aminophenyl)(thiophen-3-yl)methyl)-2,6-di-tert-butylphenol (4u)**



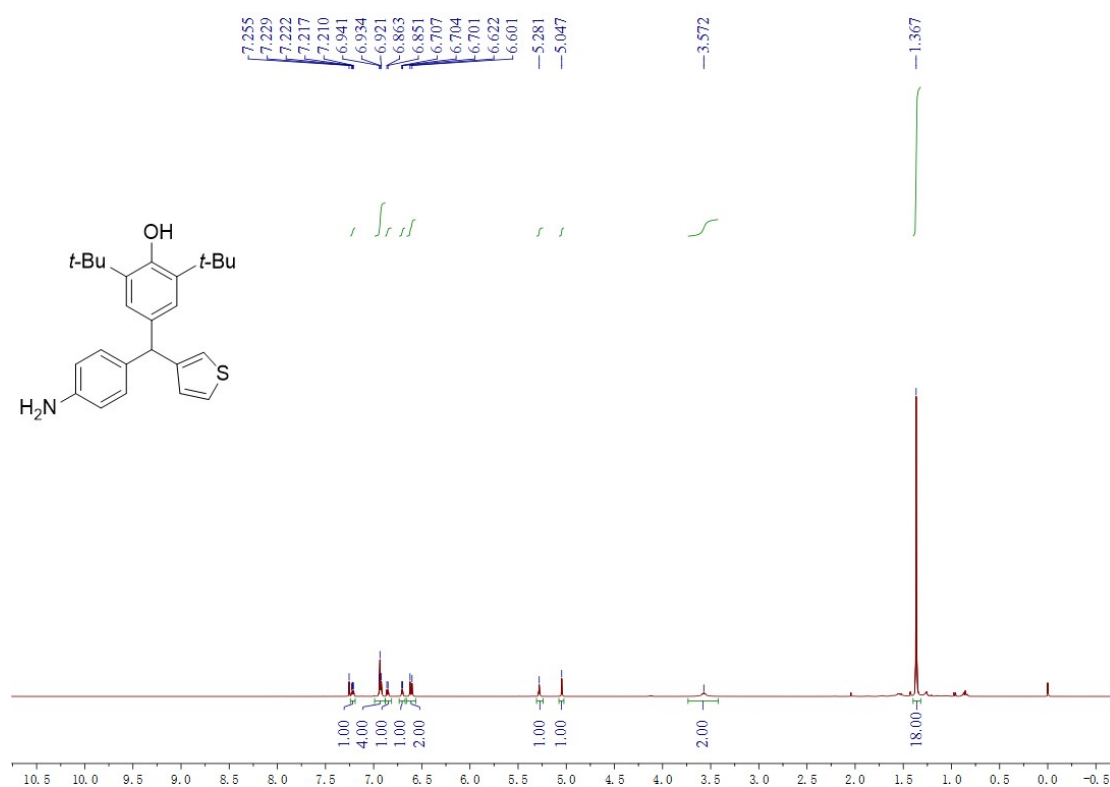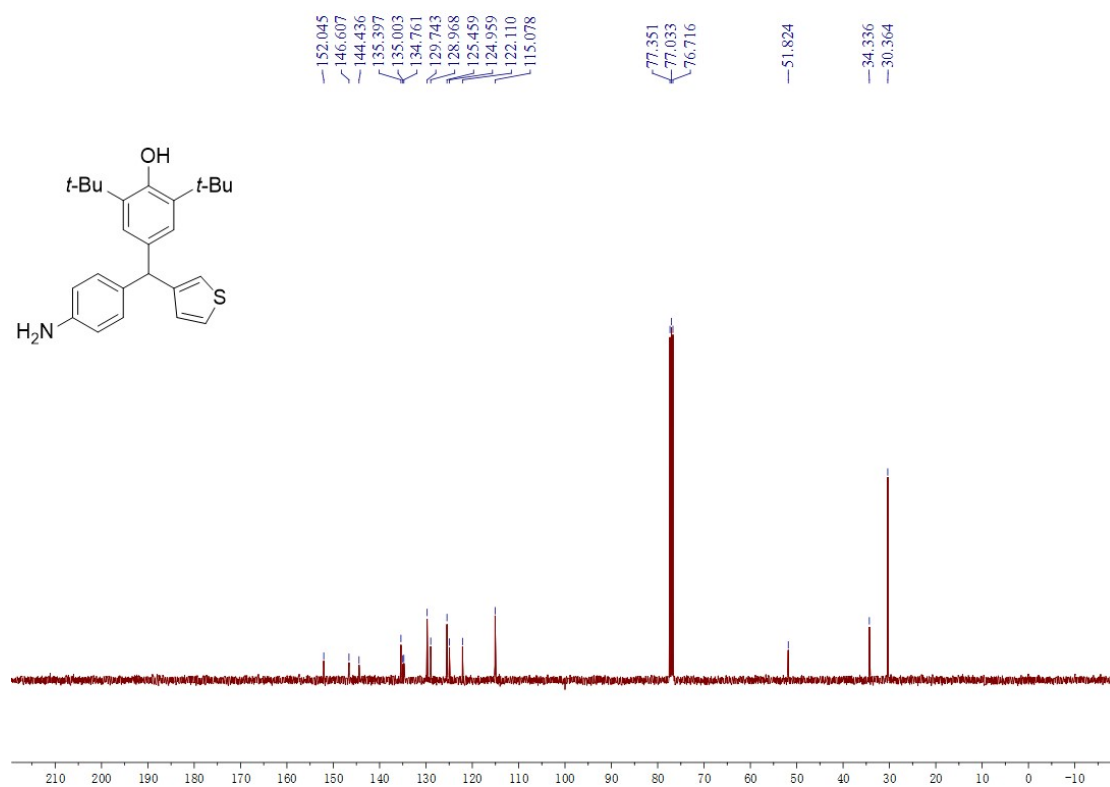

**4-((4-Aminophenyl)(thiophen-2-yl)methyl)-2,6-di-tert-butylphenol (4v)**

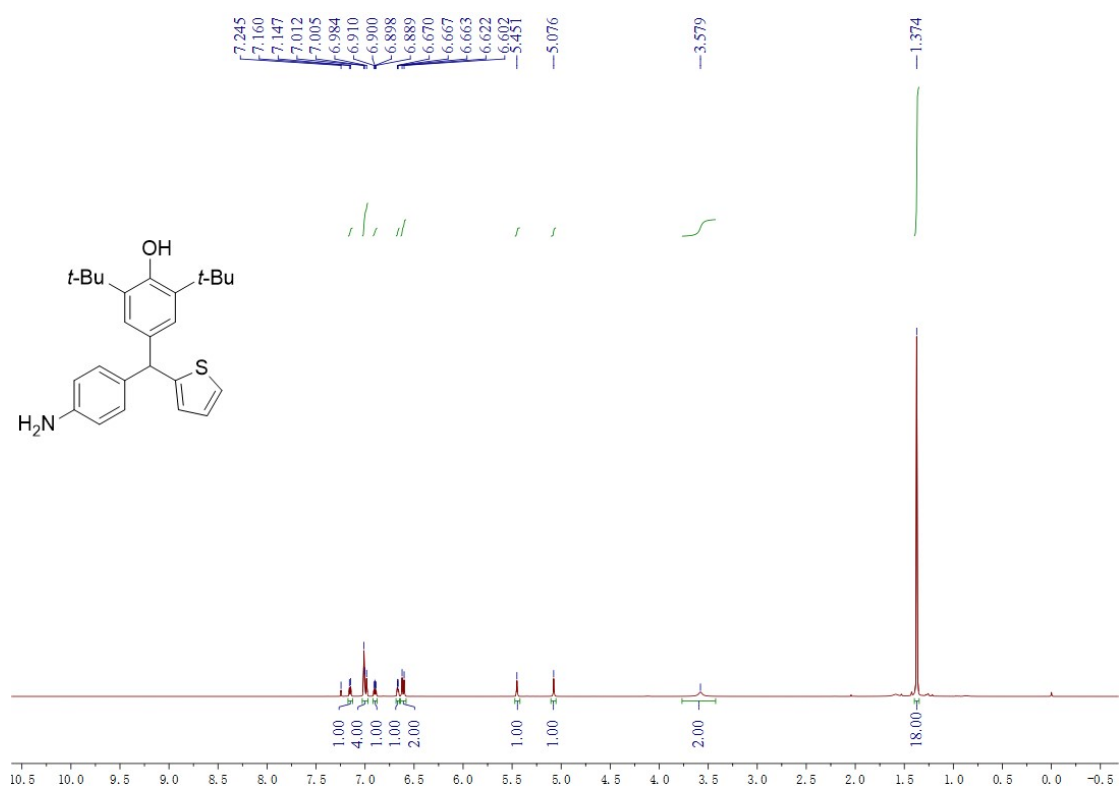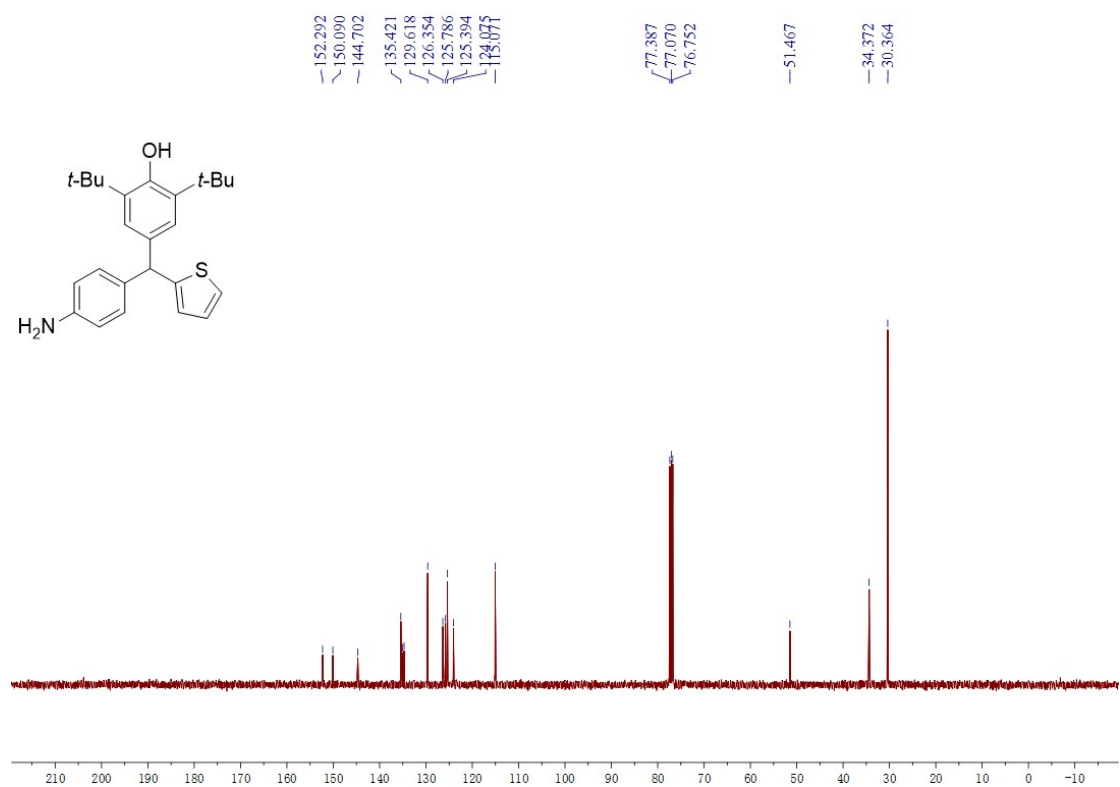

**4-((4-Aminophenyl)(5-methylfuran-2-yl)methyl)-2,6-di-tert-butylphenol (4w)**

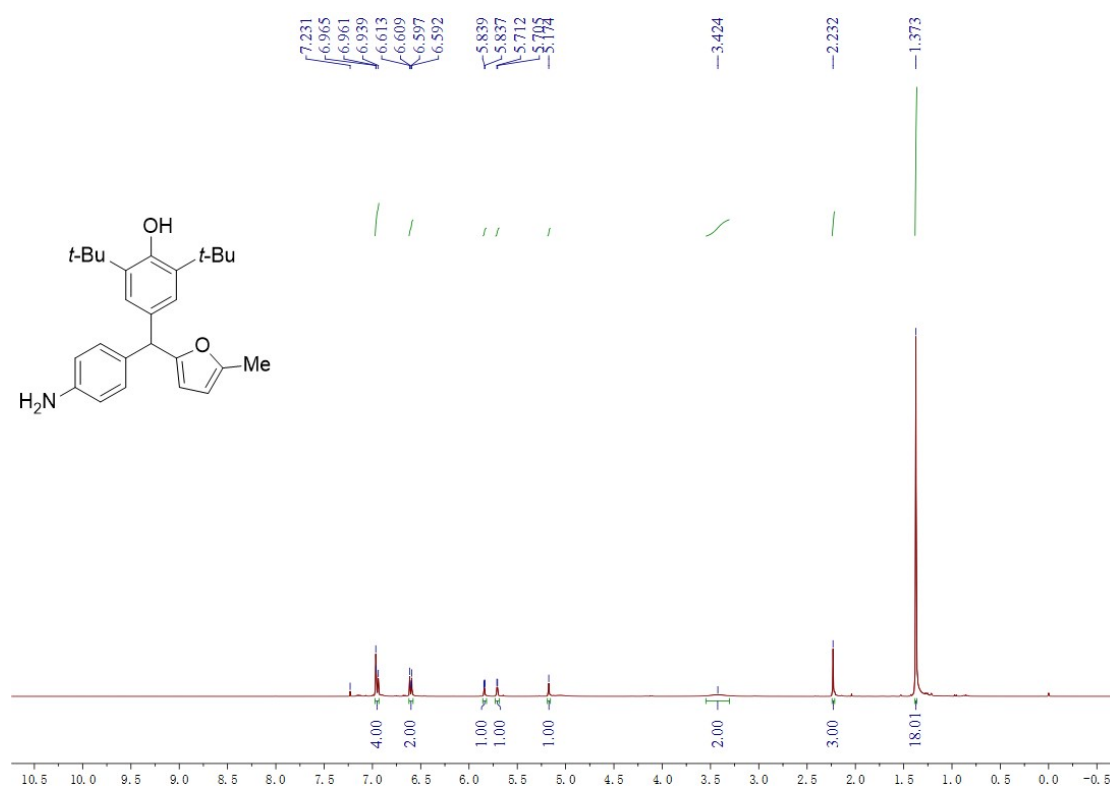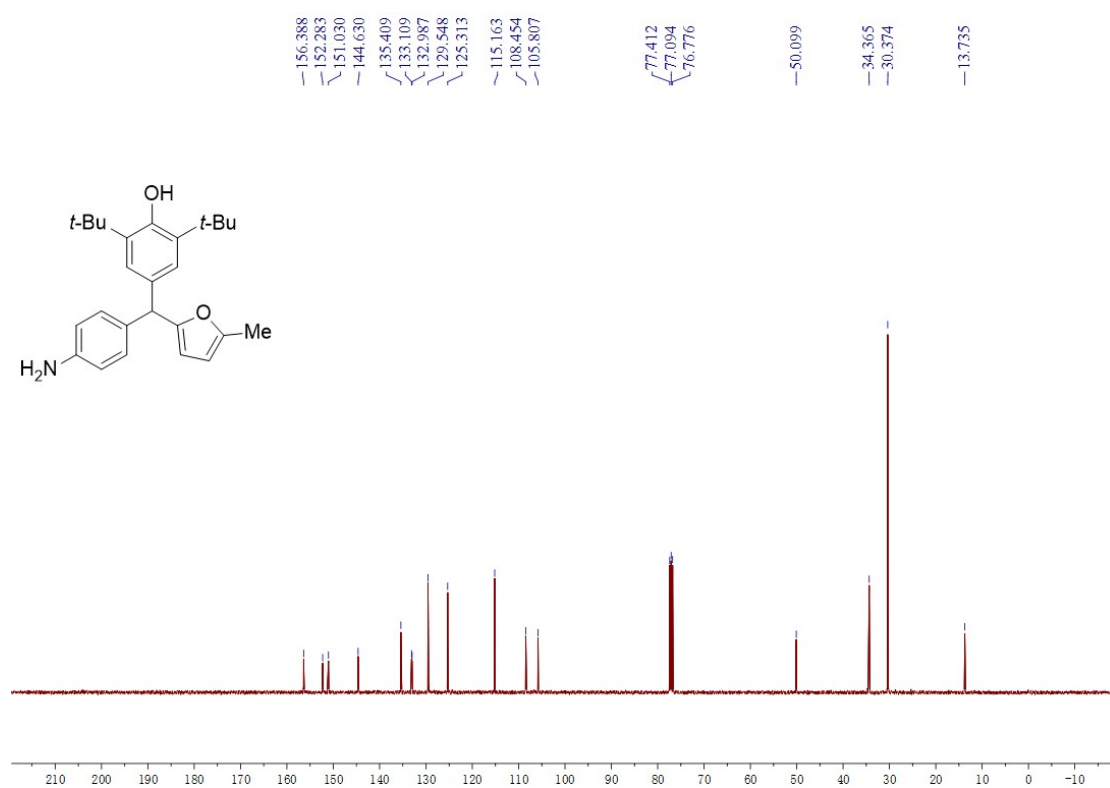

**4-((4-Aminophenyl)(2,3-dihydrobenzofuran-6-yl)methyl)-2,6-di-tert-butylphenol (4x)**

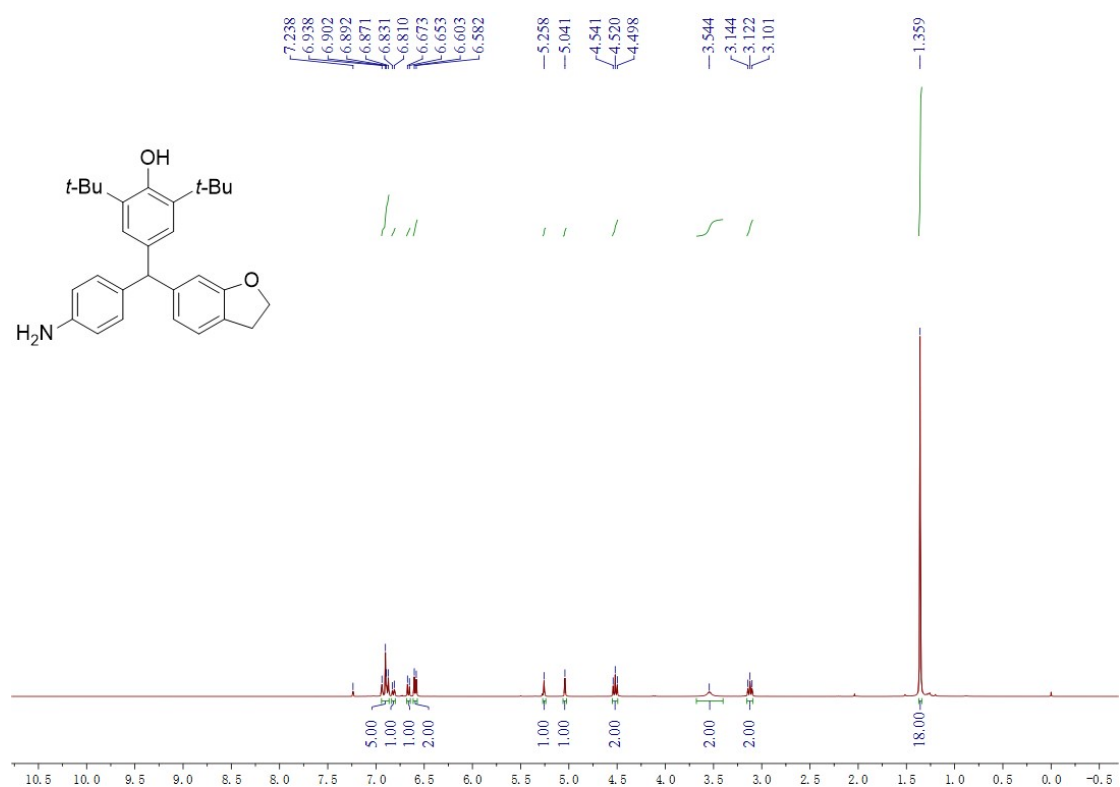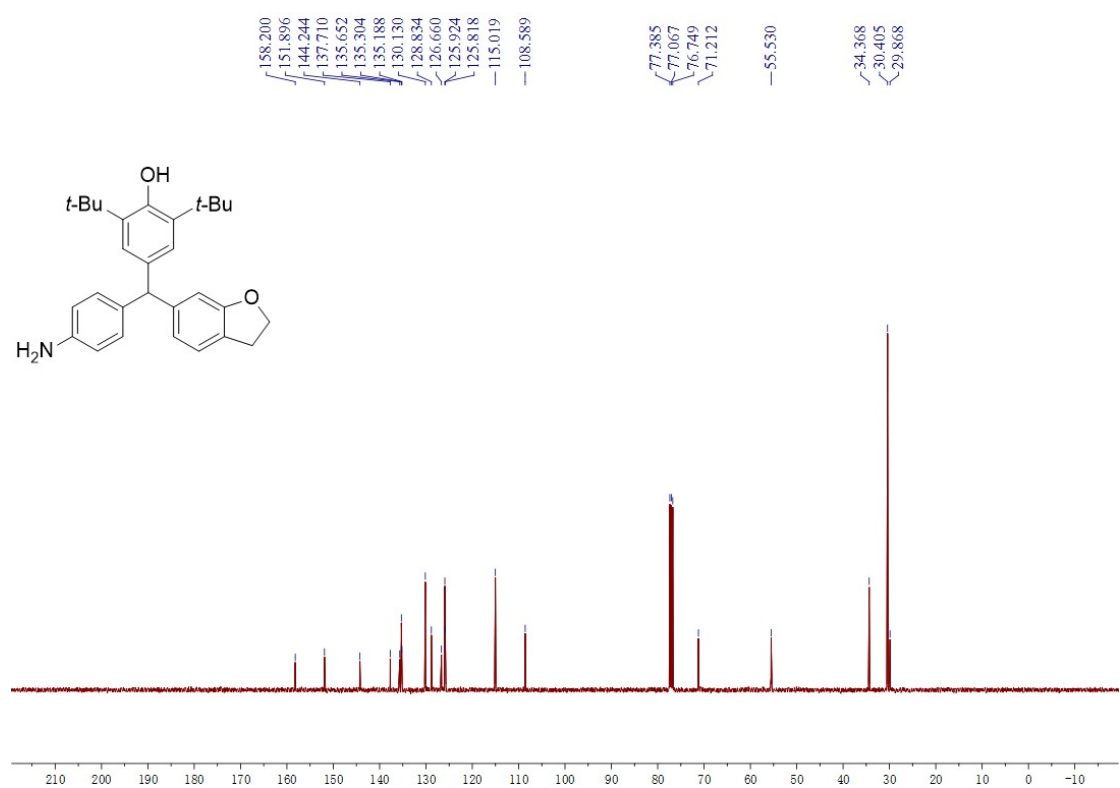

**4-((4-Aminophenyl)(pyridin-2-yl)methyl)-2,6-di-tert-butylphenol (4y)**

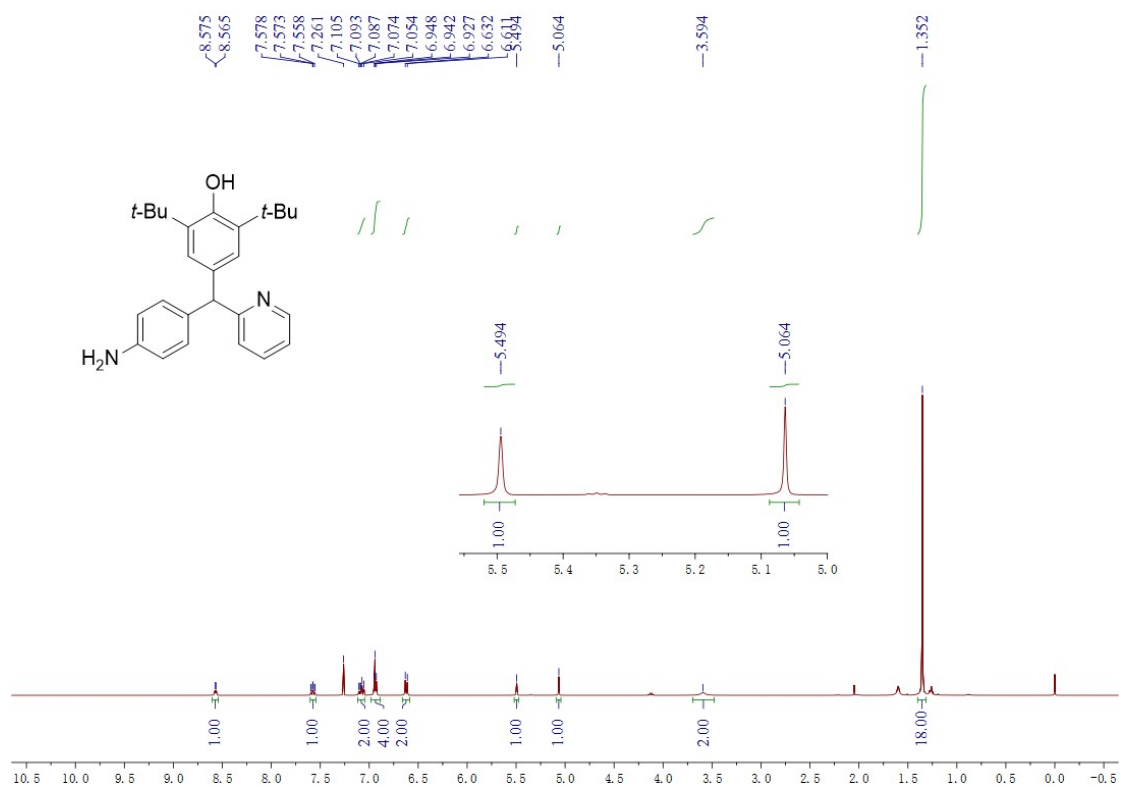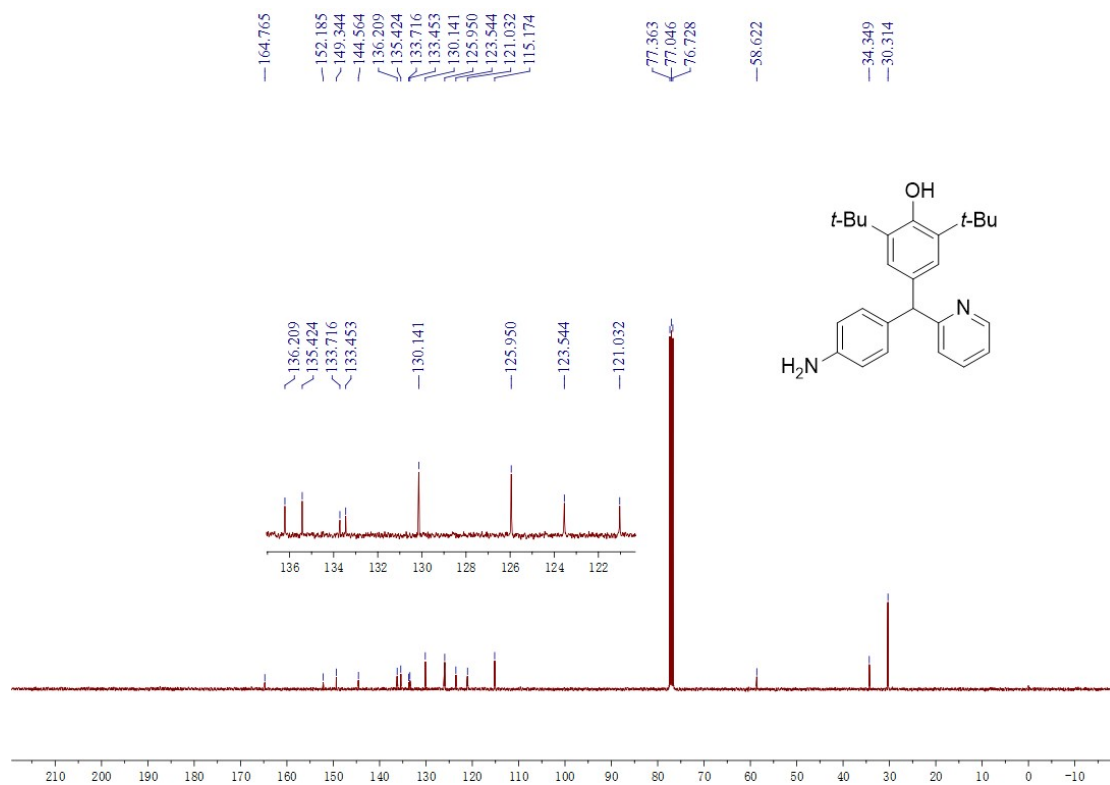

4-((4-Aminophenyl)(anthracen-9-yl)methyl)-2,6-di-tert-butylphenol (4aa)

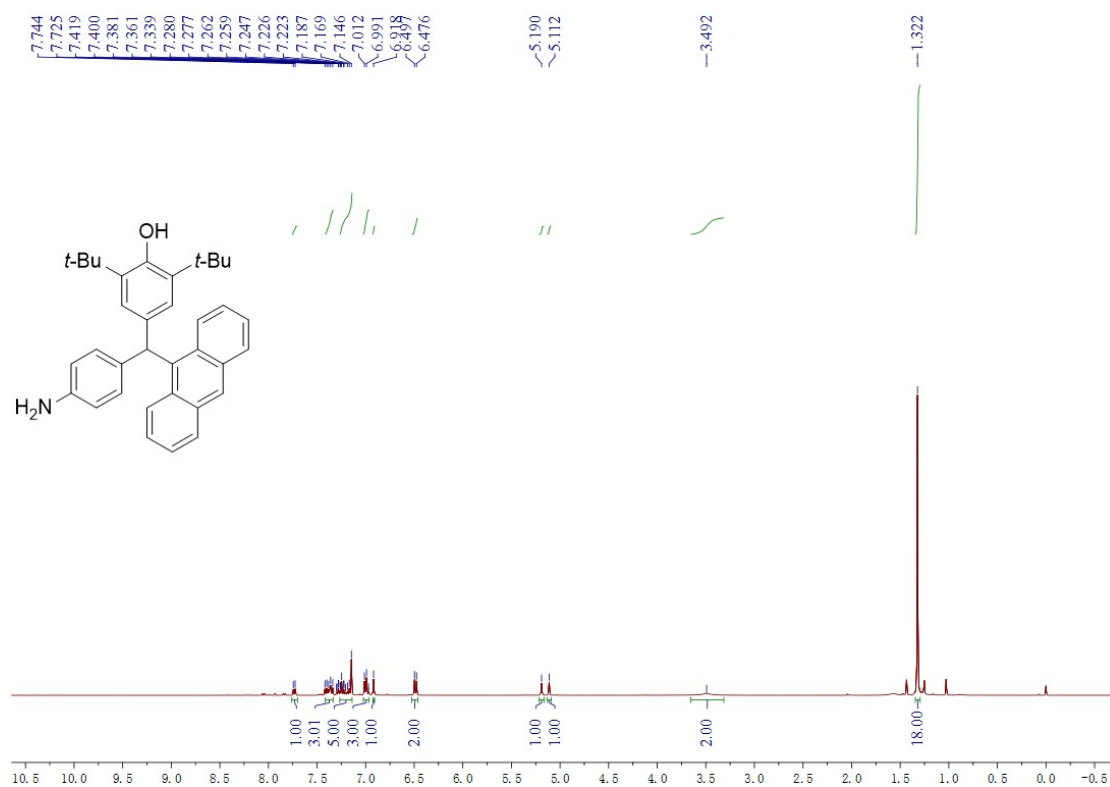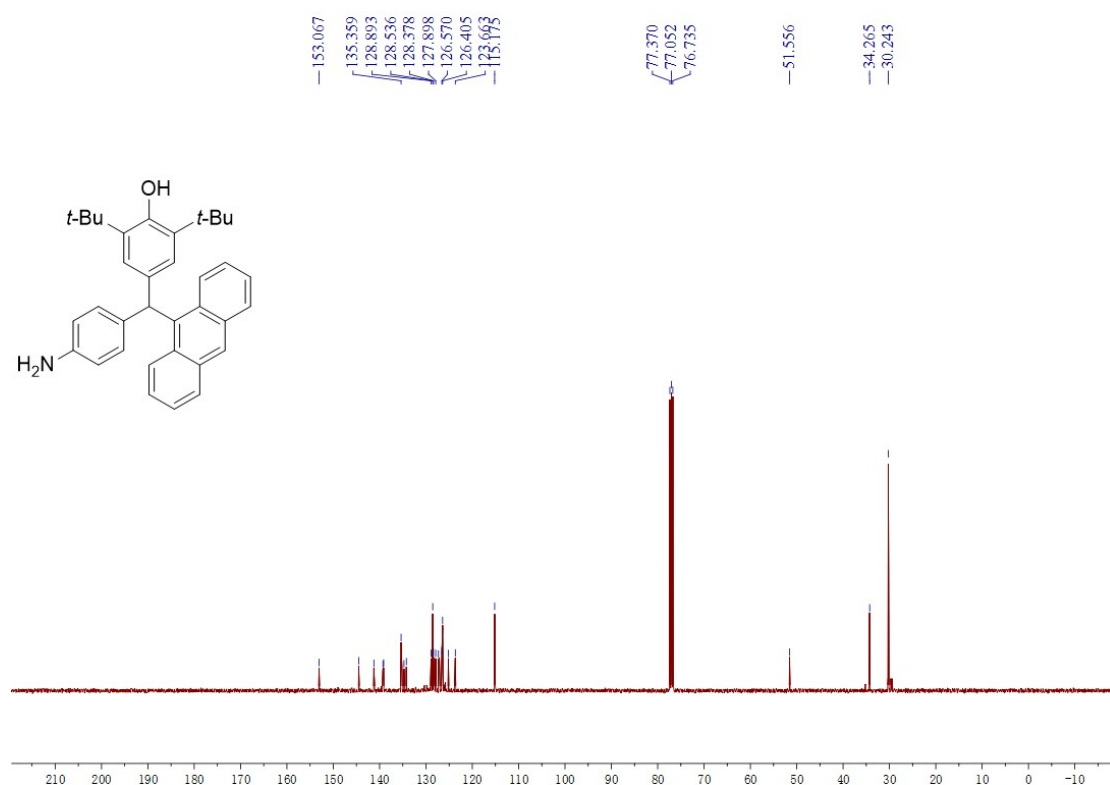

**4-((4-Aminophenyl)(phenyl)methyl)-2,6-dimethylphenol (4ab)**

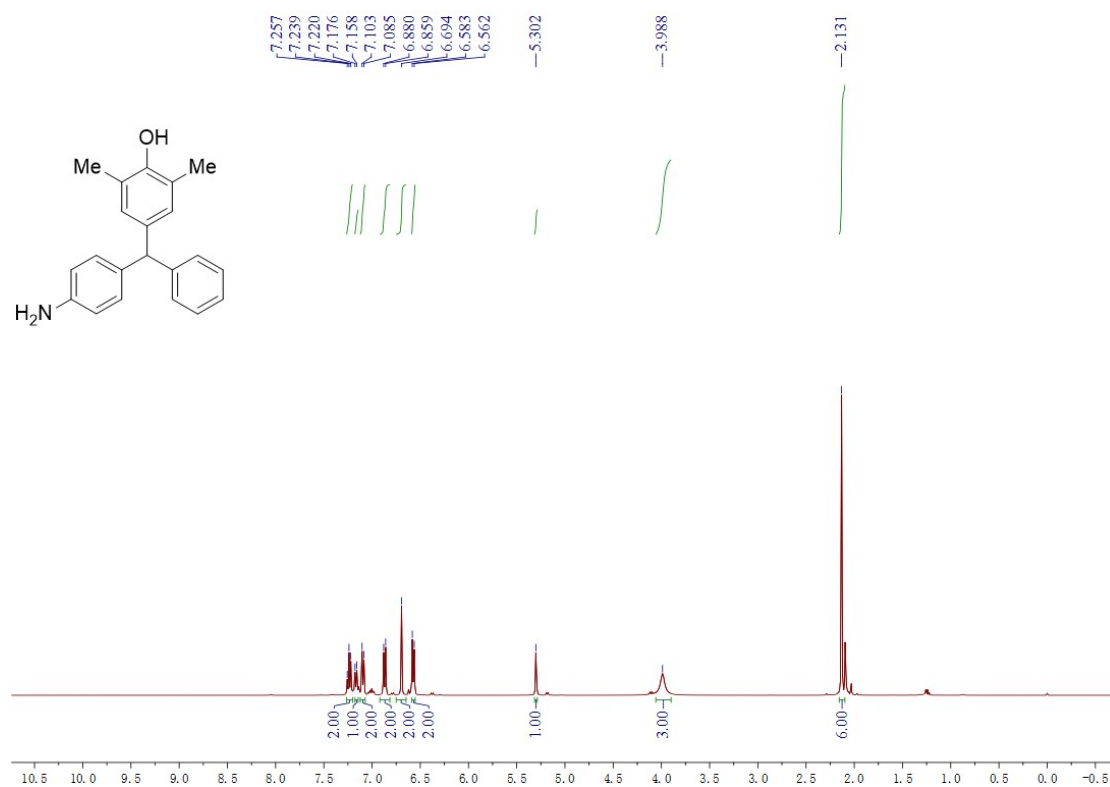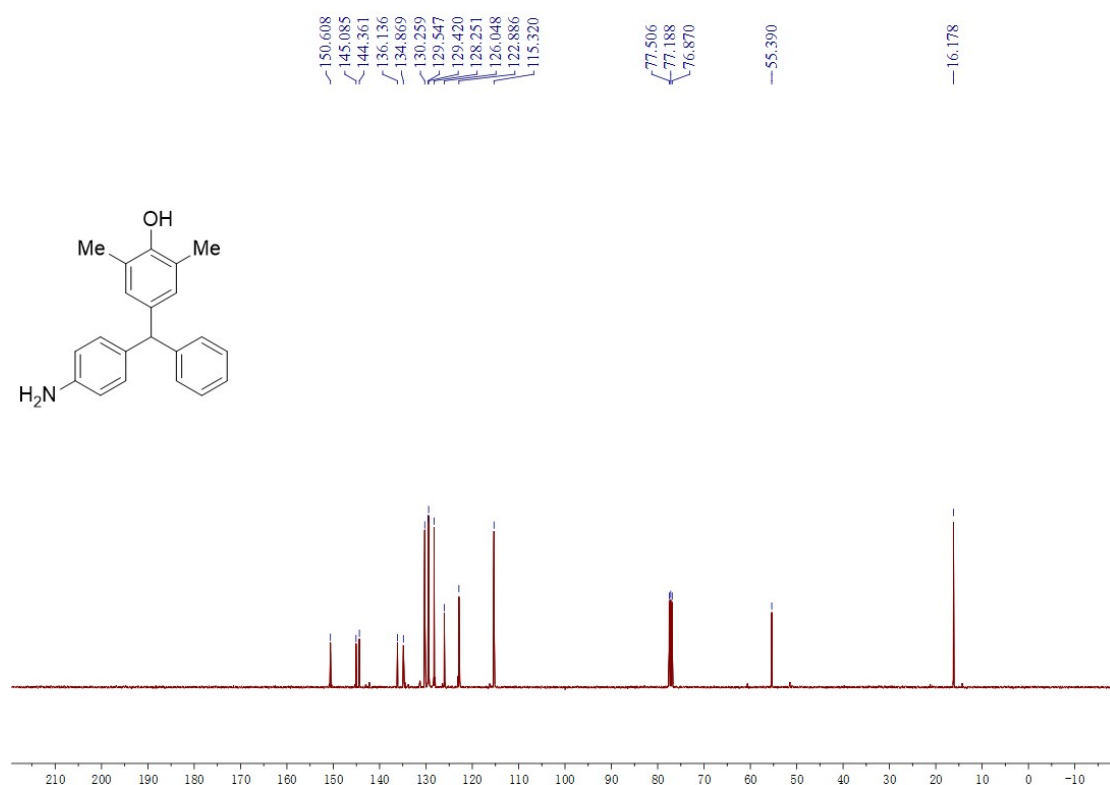

**4-((4-Aminophenyl)(phenyl)methyl)-2,6-diisopropylphenol (4ac)**

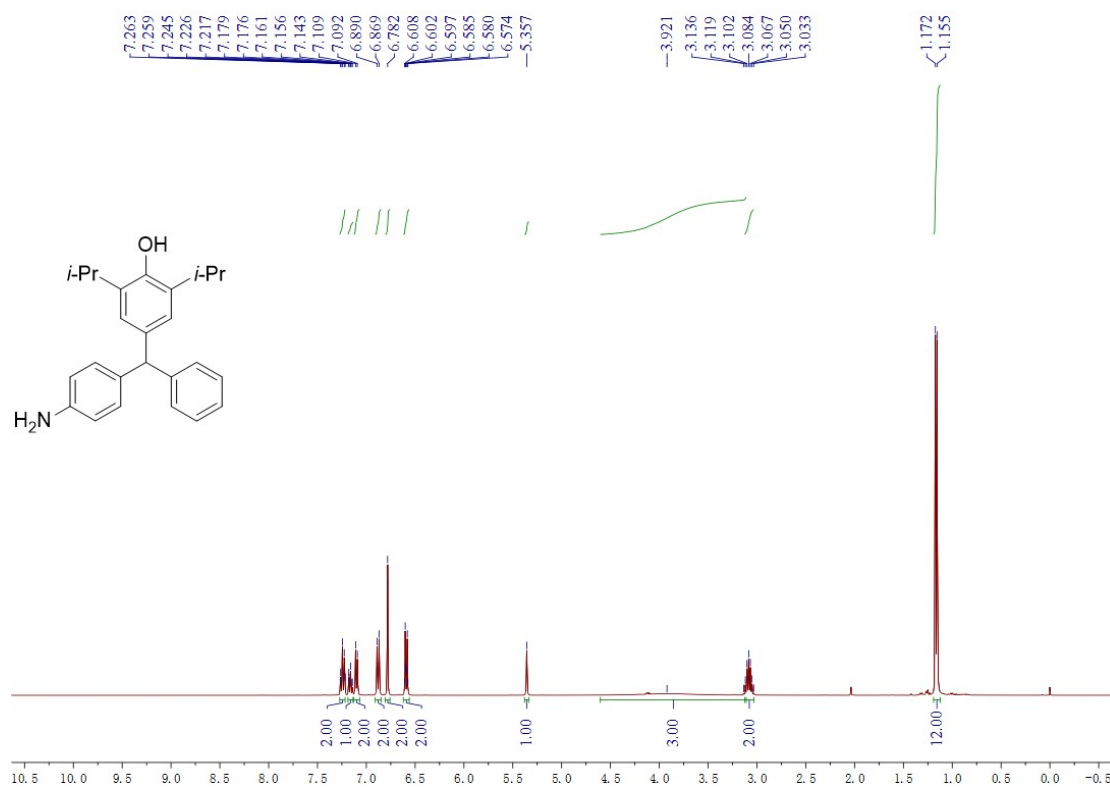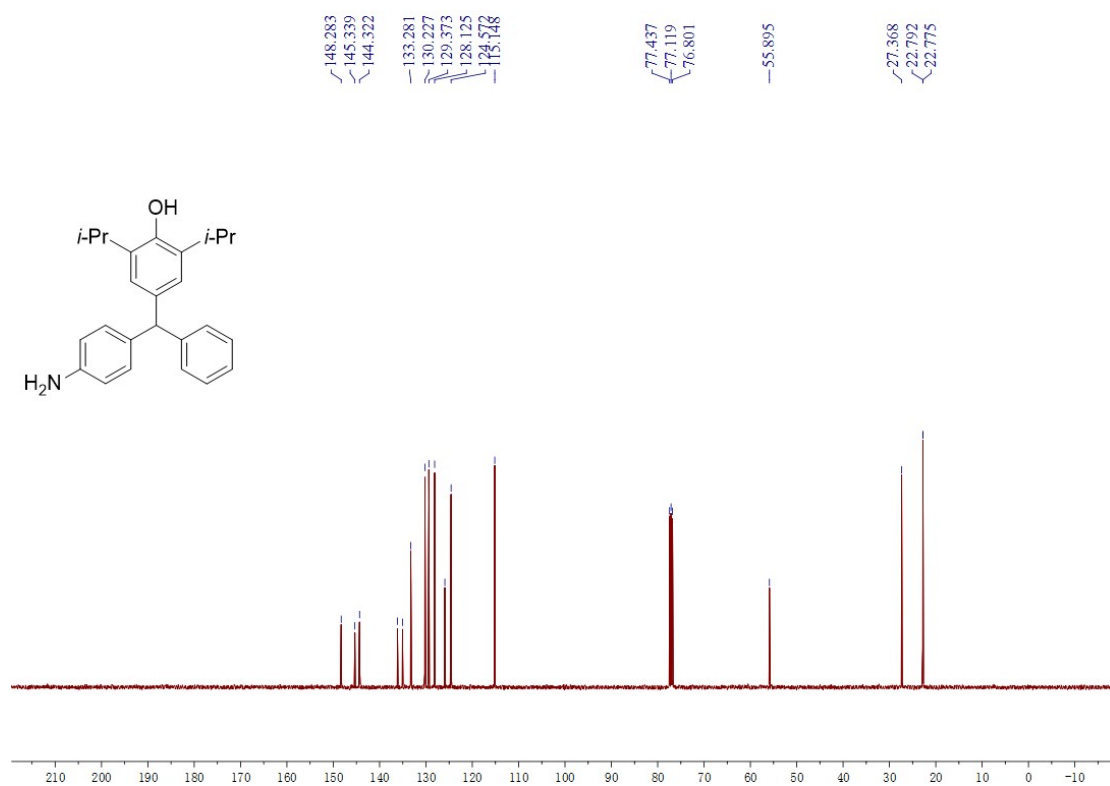

**5'-((4-Aminophenyl)(phenyl)methyl)-[1,1':3',1''-terphenyl]-2'-ol (4ad)**



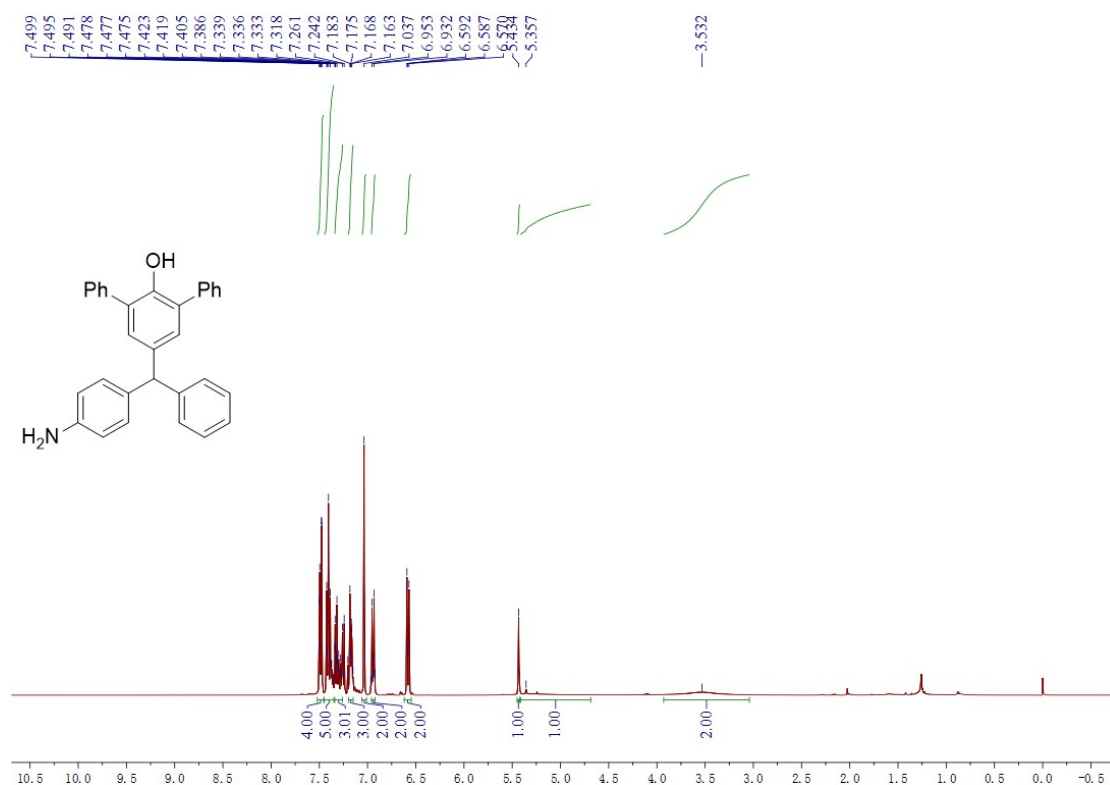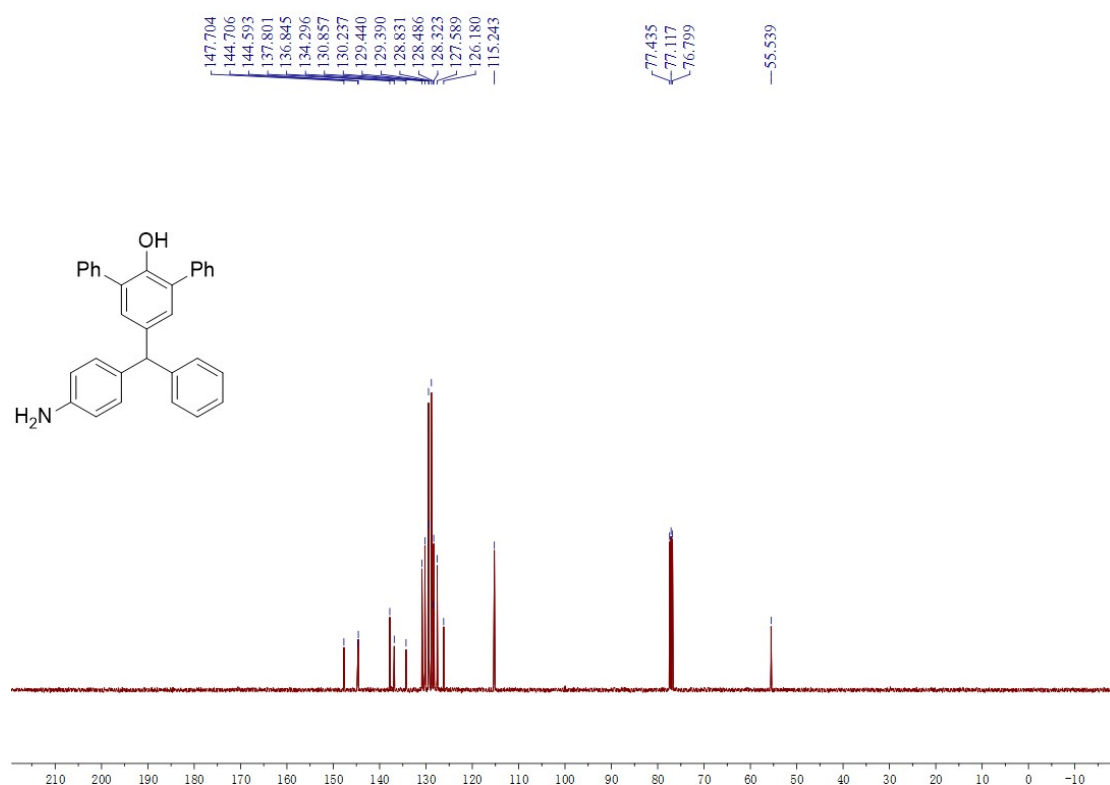

**4,4'-(1,4-Phenylenebis((4-Aminophenyl)methylene))bis(2,6-di-tert-butylphenol) (4ae)**

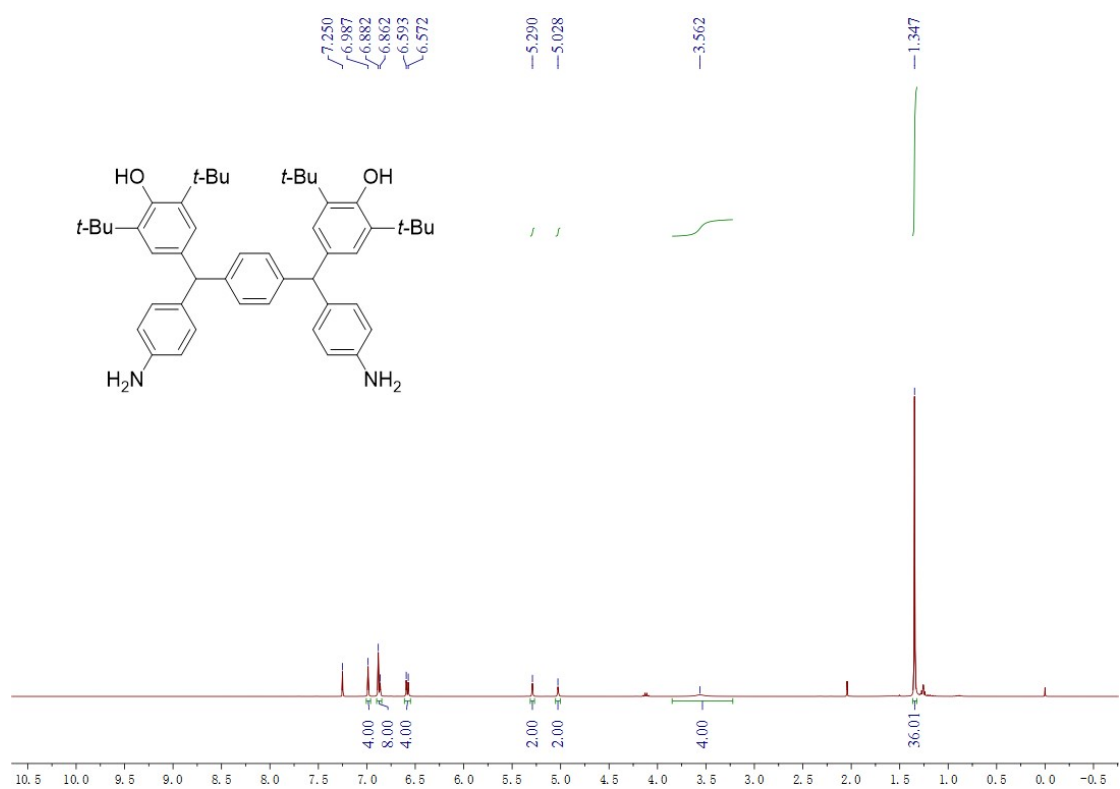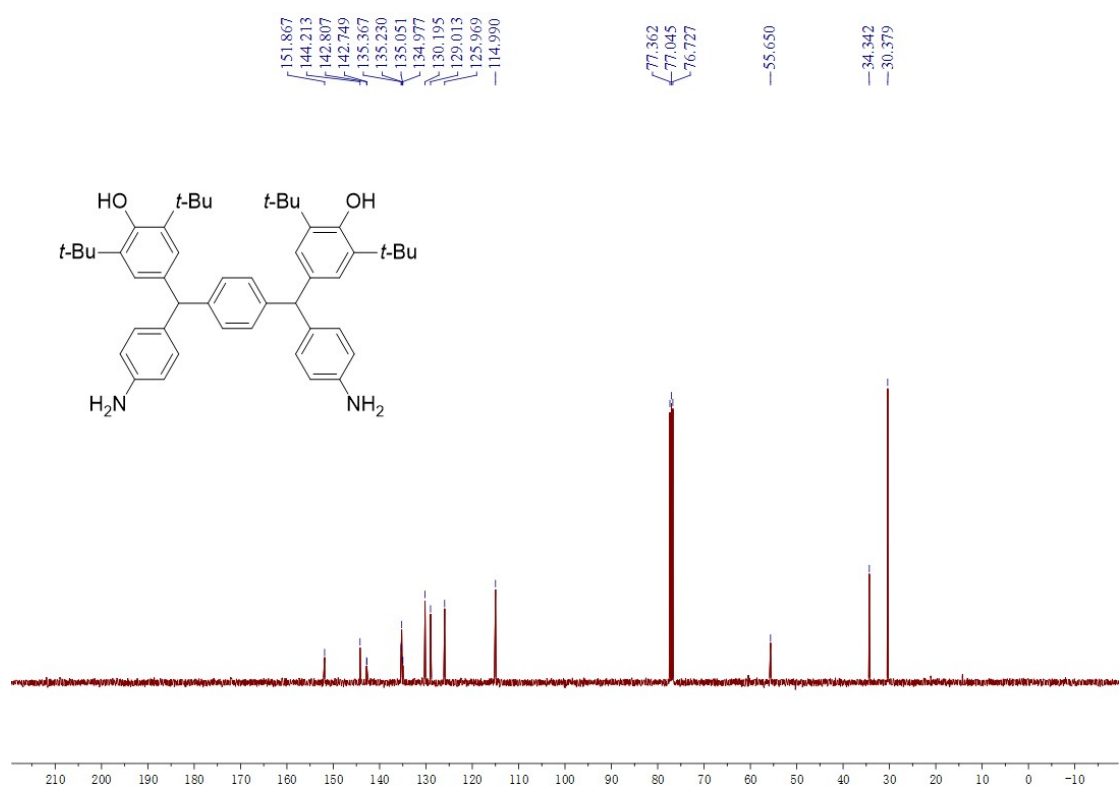

**2,6-Di-tert-butyl-4-((4-hydroxyphenyl)(phenyl)methyl)phenol (6a)**

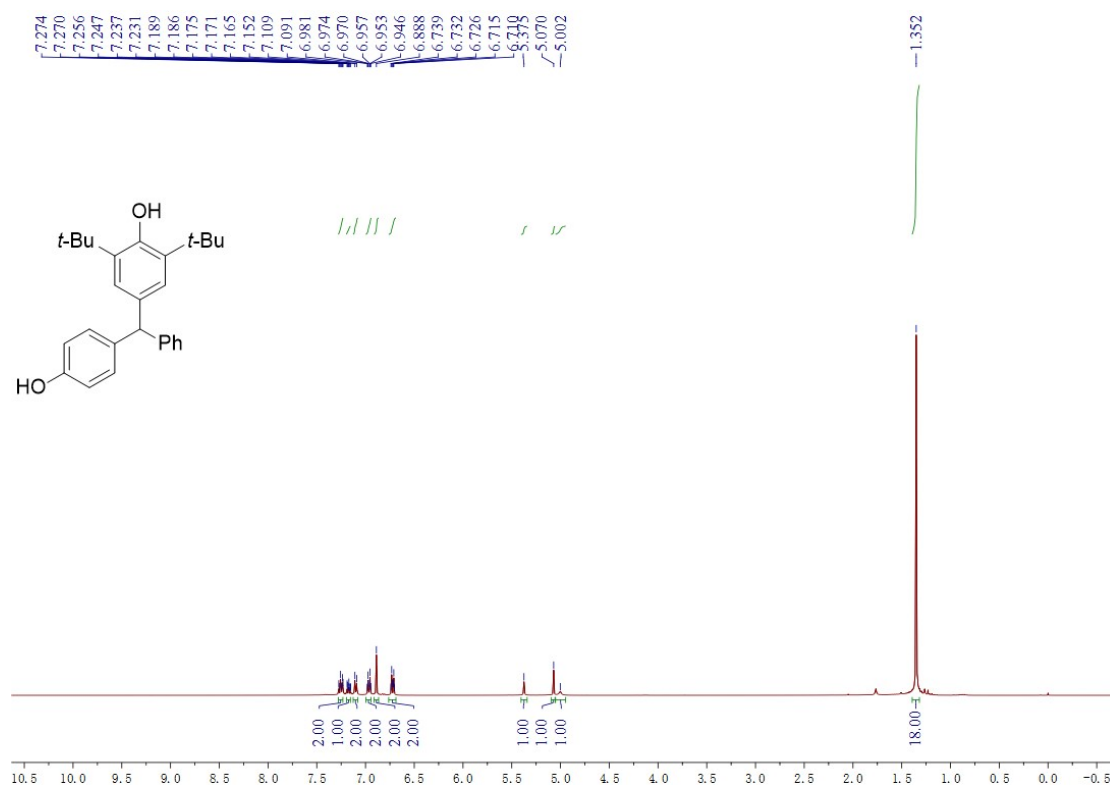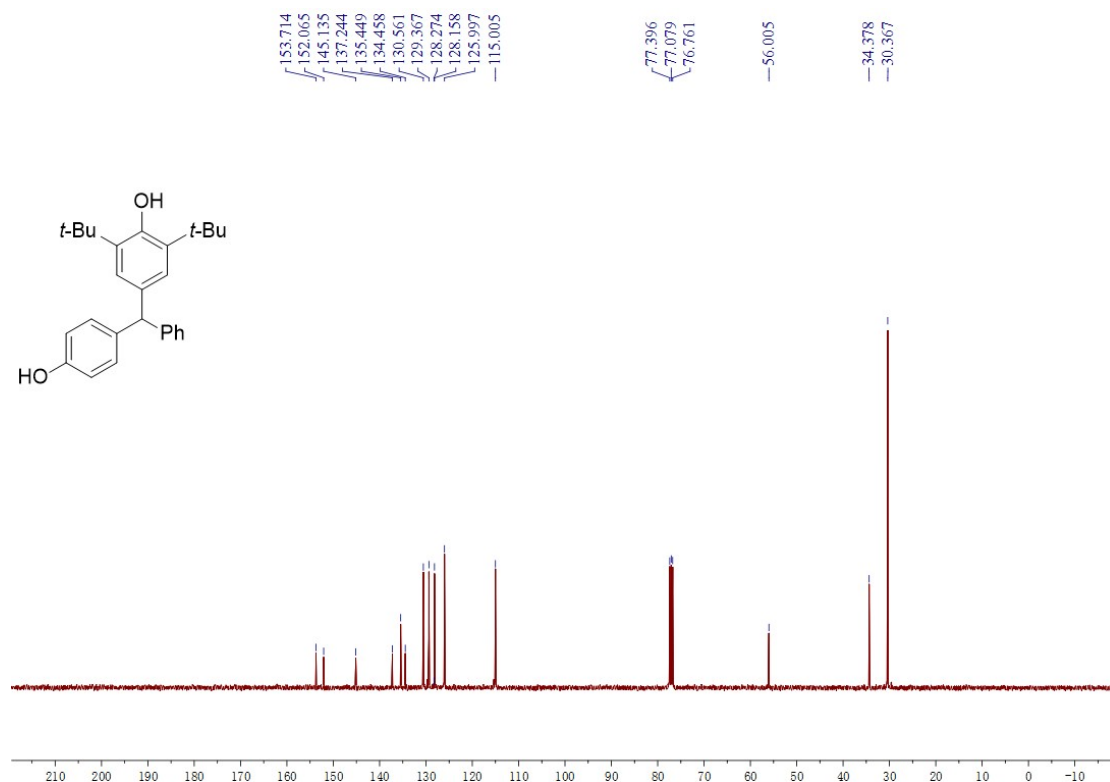

**2,6-Di-*tert*-butyl-4-((4-hydroxy-2-methylphenyl)(phenyl)methyl)phenol (6b)**

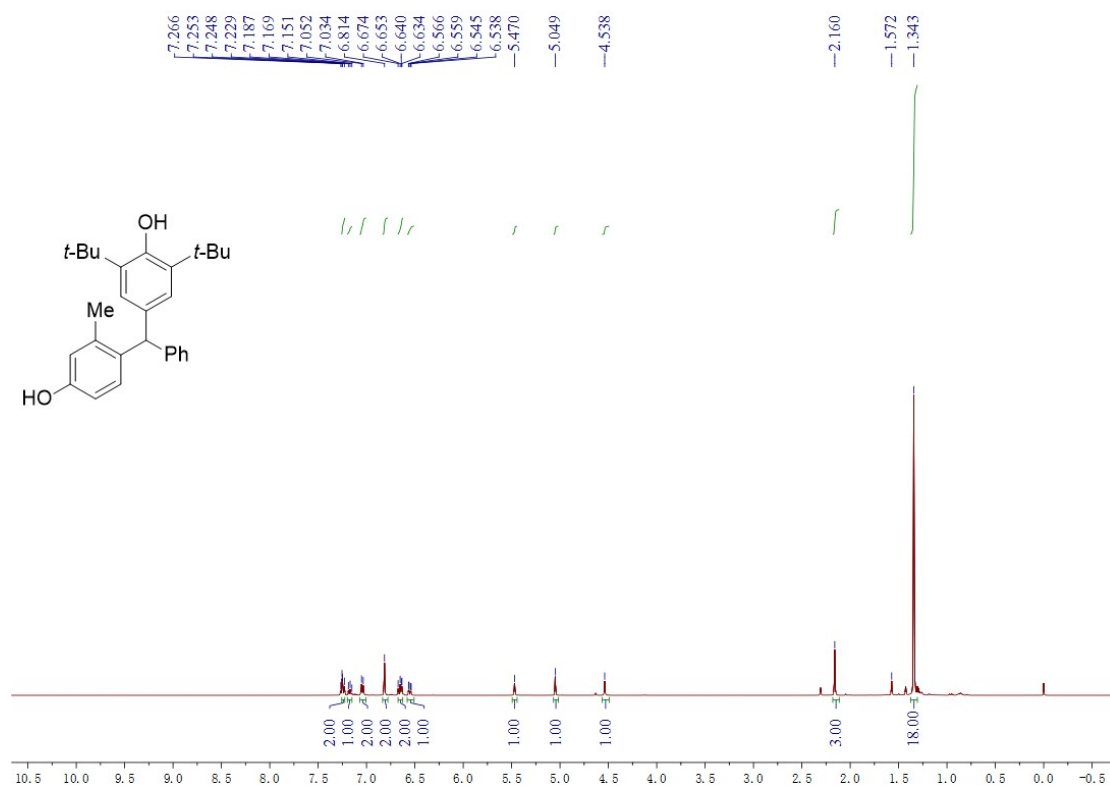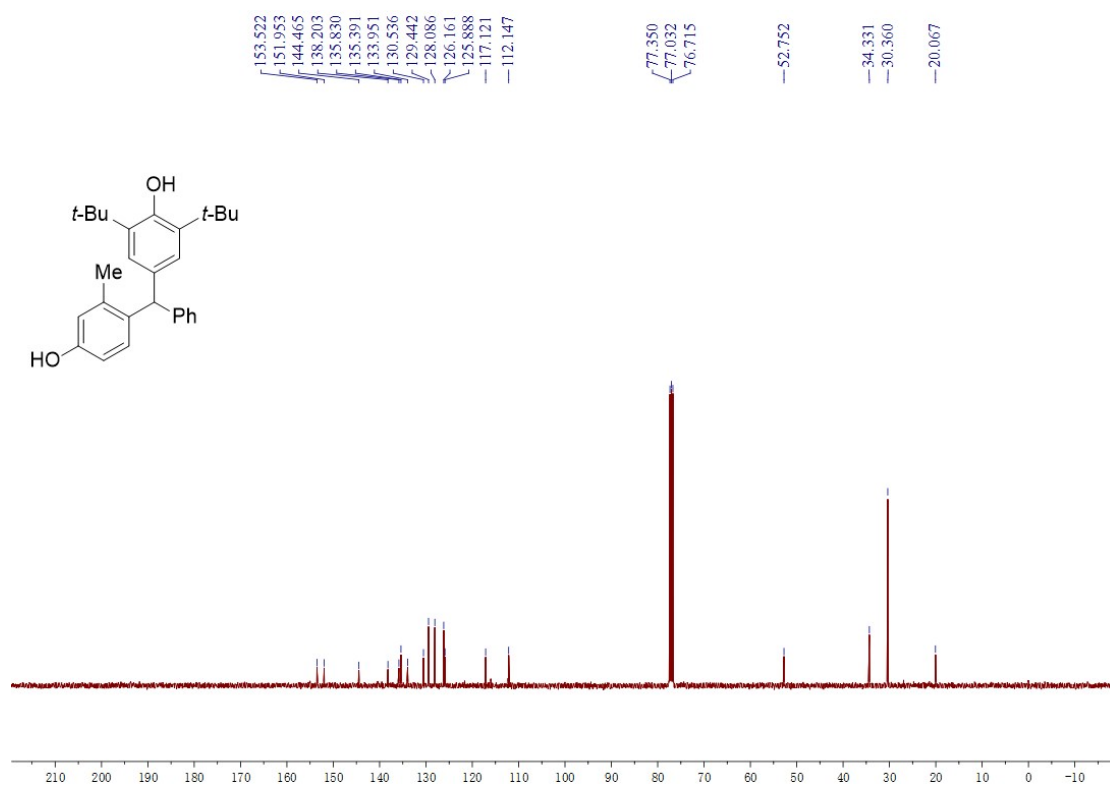

**2,6-Di-tert-butyl-4-((4-hydroxy-2-methoxyphenyl)(phenyl)methyl)phenol (6c)**

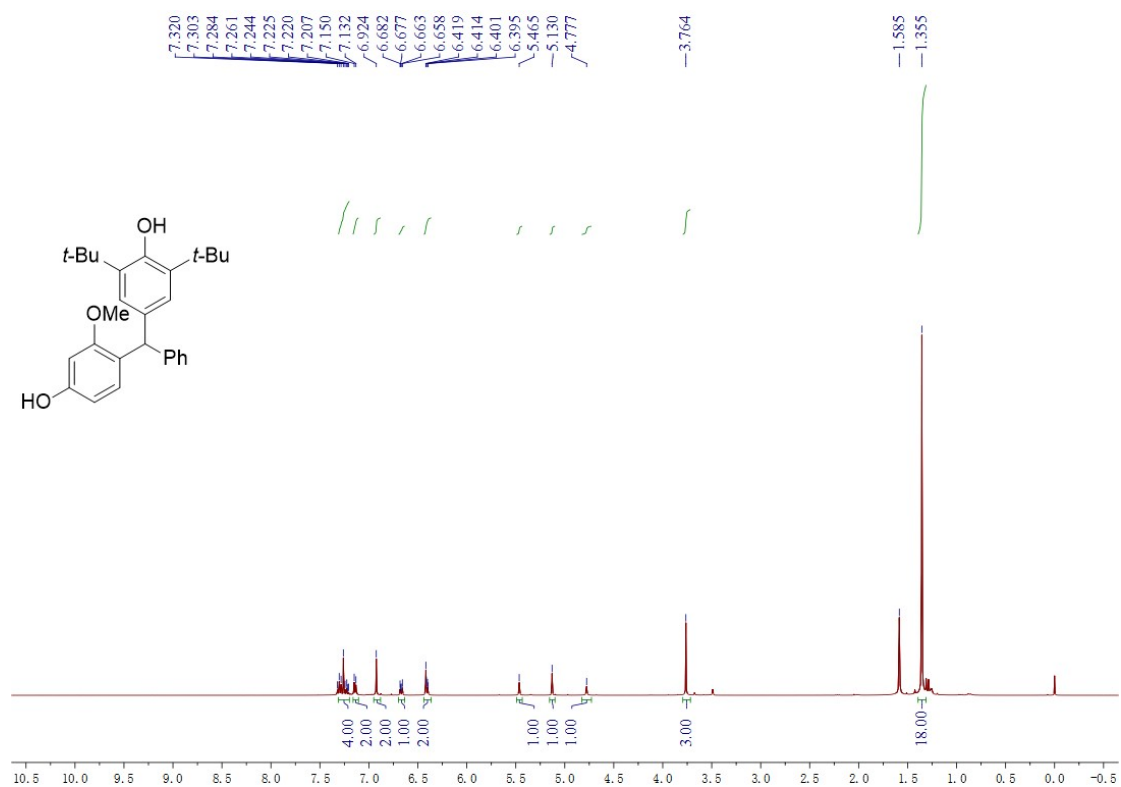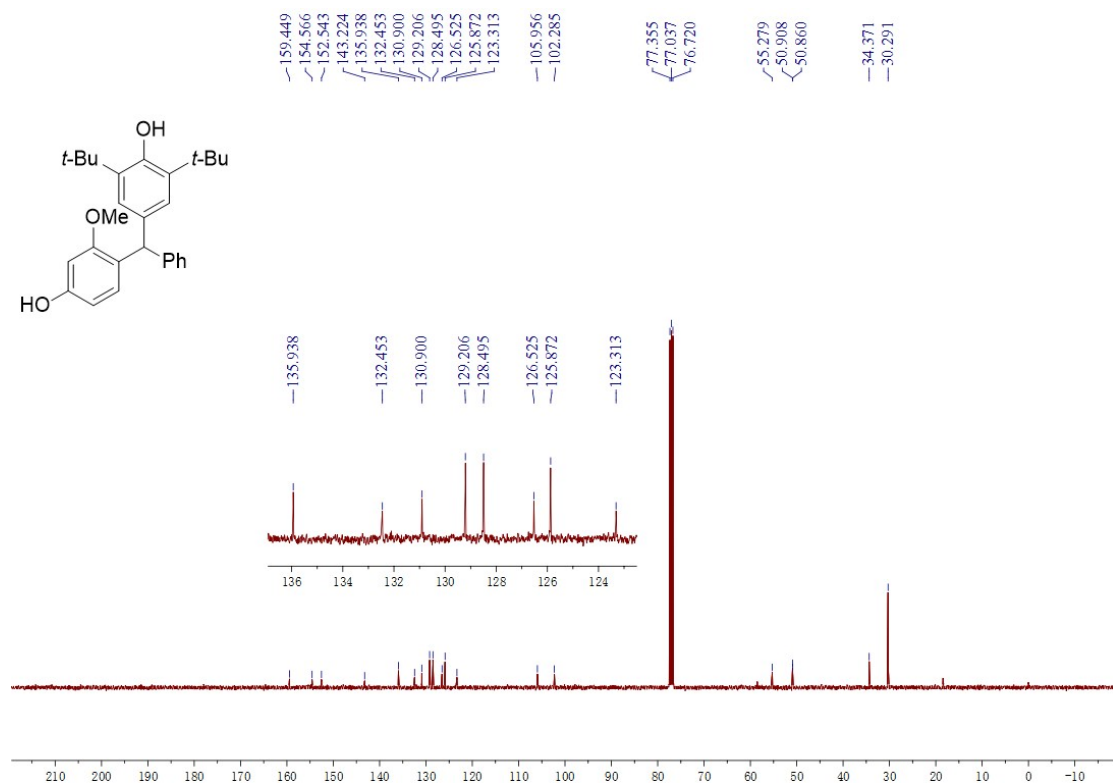

**2,6-Di-tert-butyl-4-((4-hydroxy-3-methylphenyl)(phenyl)methyl)phenol (6d)**

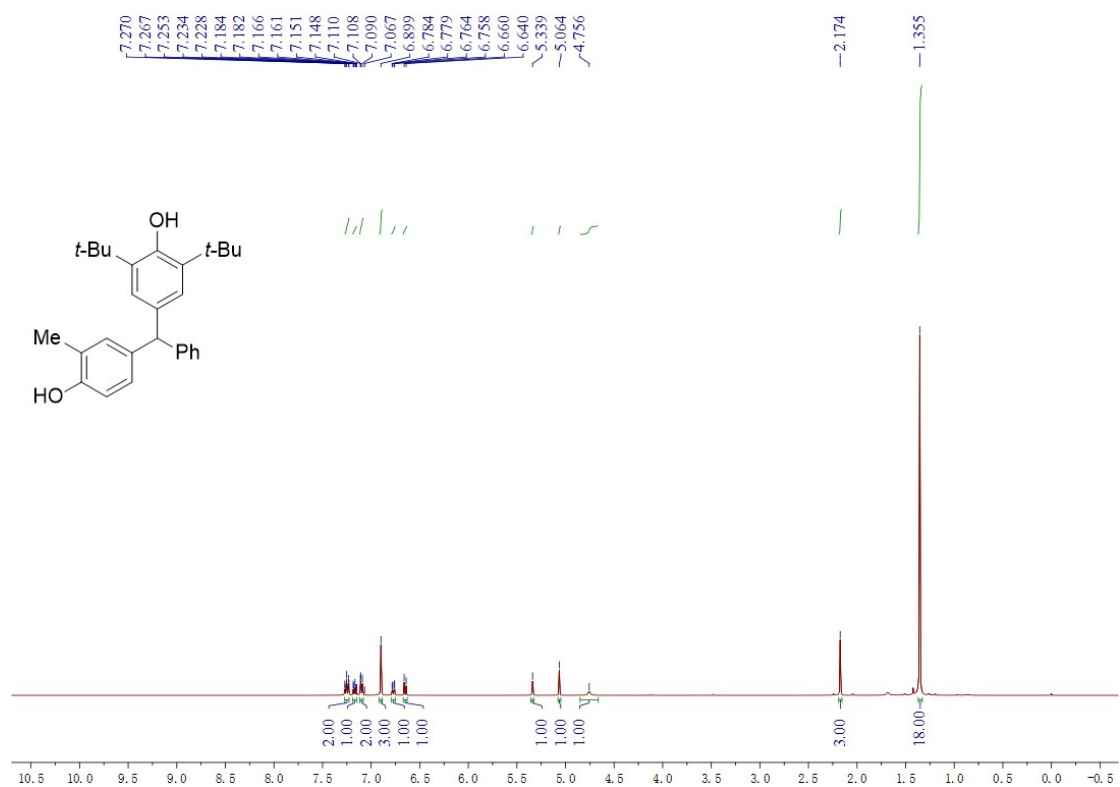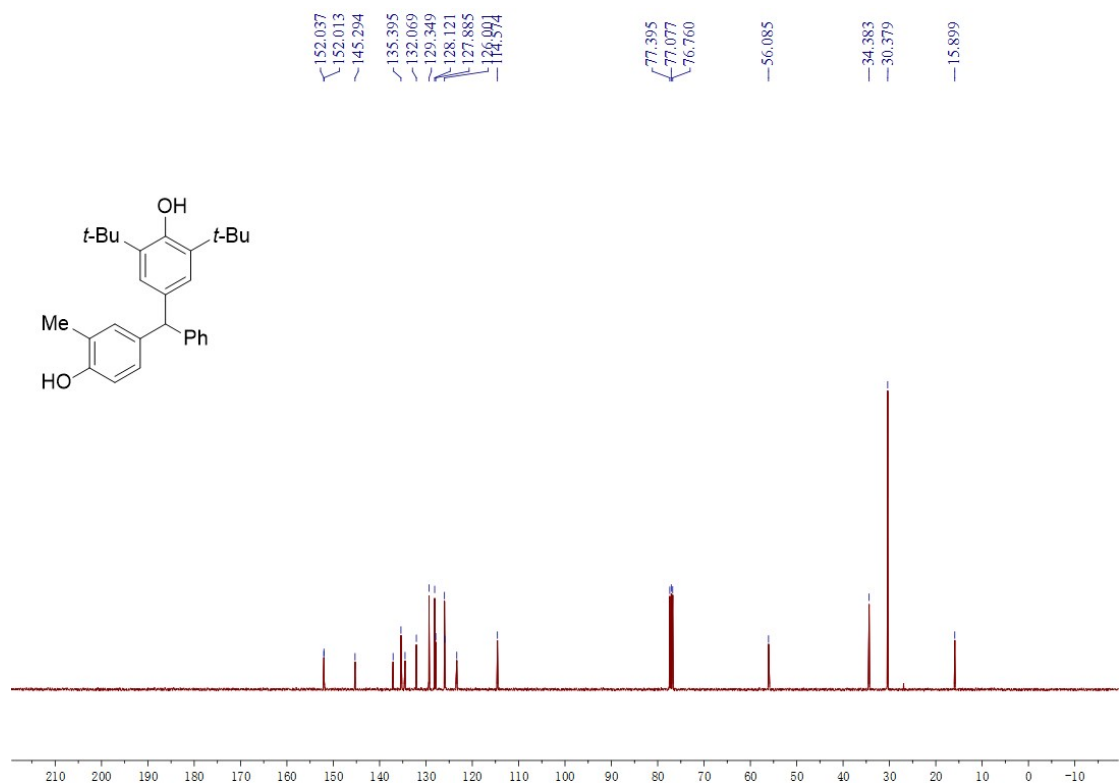

**2,6-Di-tert-butyl-4-((3-ethyl-4-hydroxyphenyl)(phenyl)methyl)phenol (6e)**

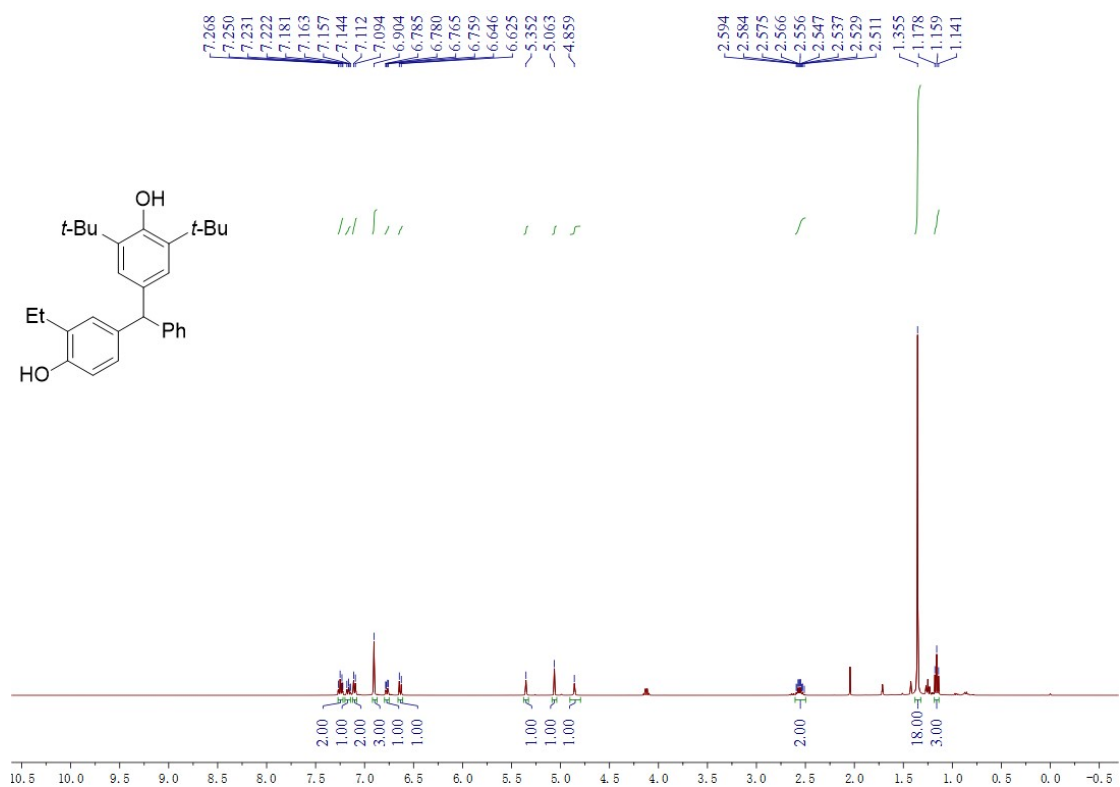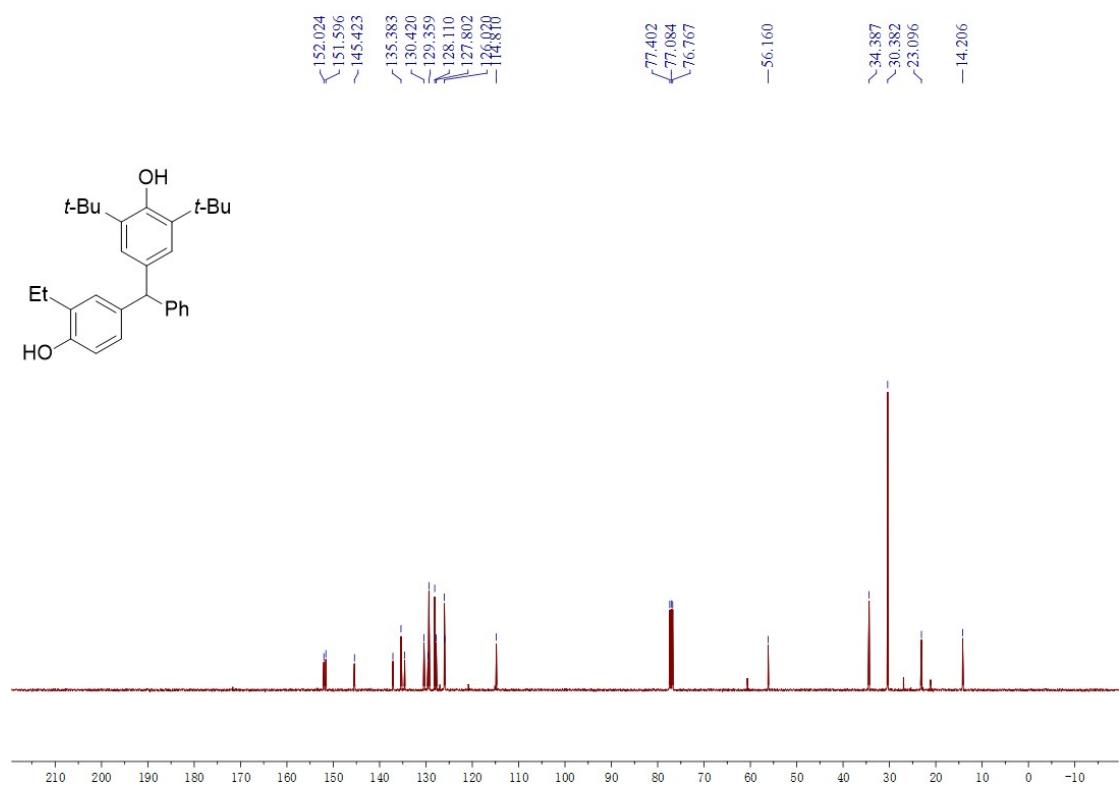

**2,6-Di-tert-butyl-4-((4-hydroxy-3-methoxyphenyl)(phenyl)methyl)phenol (6f)**

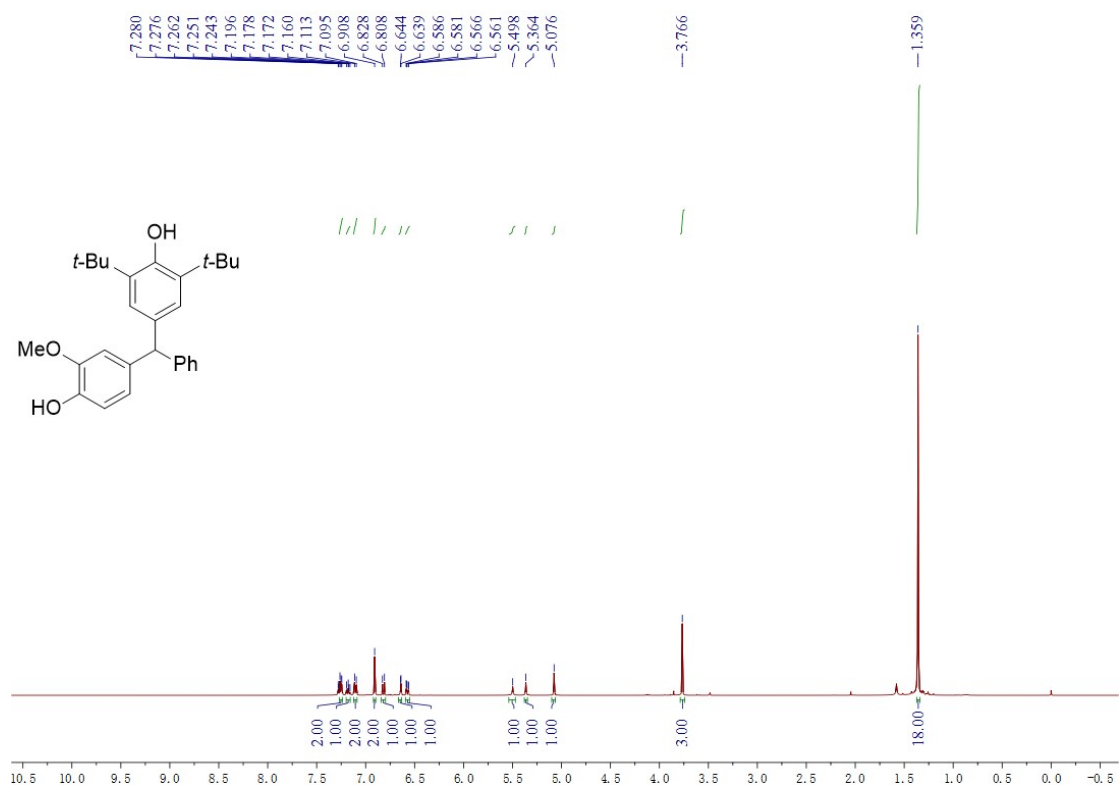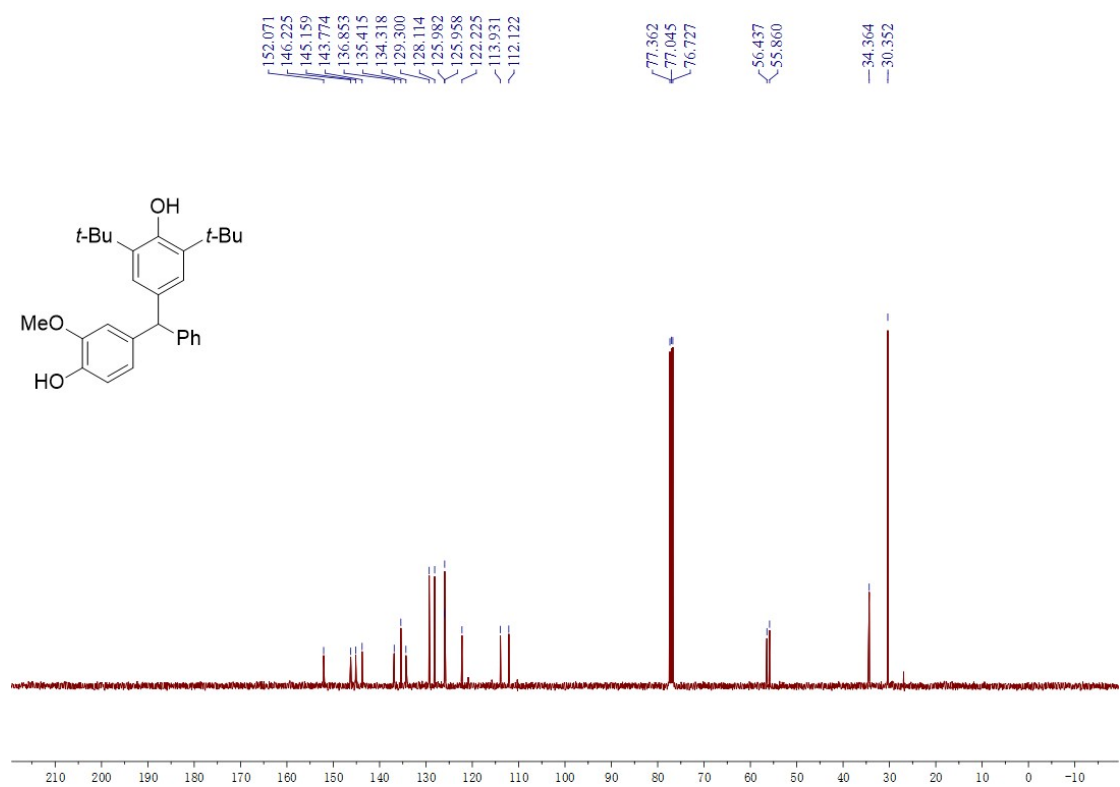

**5-((3,5-Di-*tert*-butyl-4-hydroxyphenyl)(phenyl)methyl)-[1,1'-biphenyl]-2-ol (6g)**



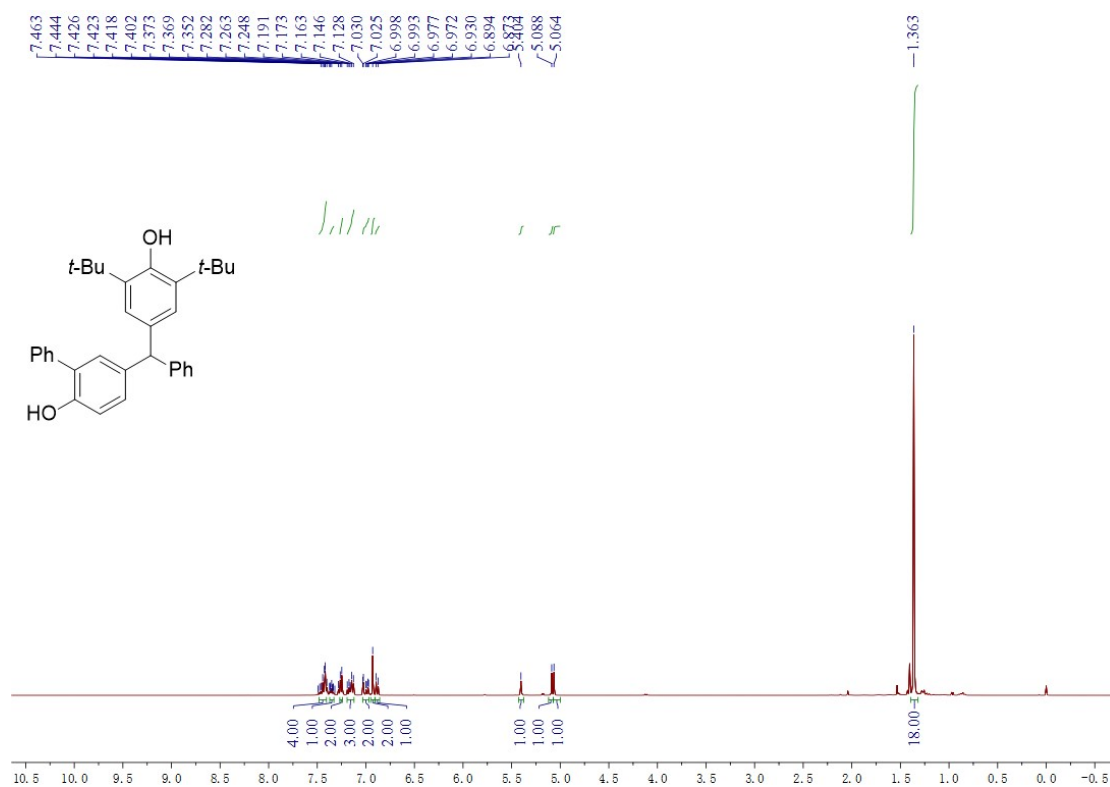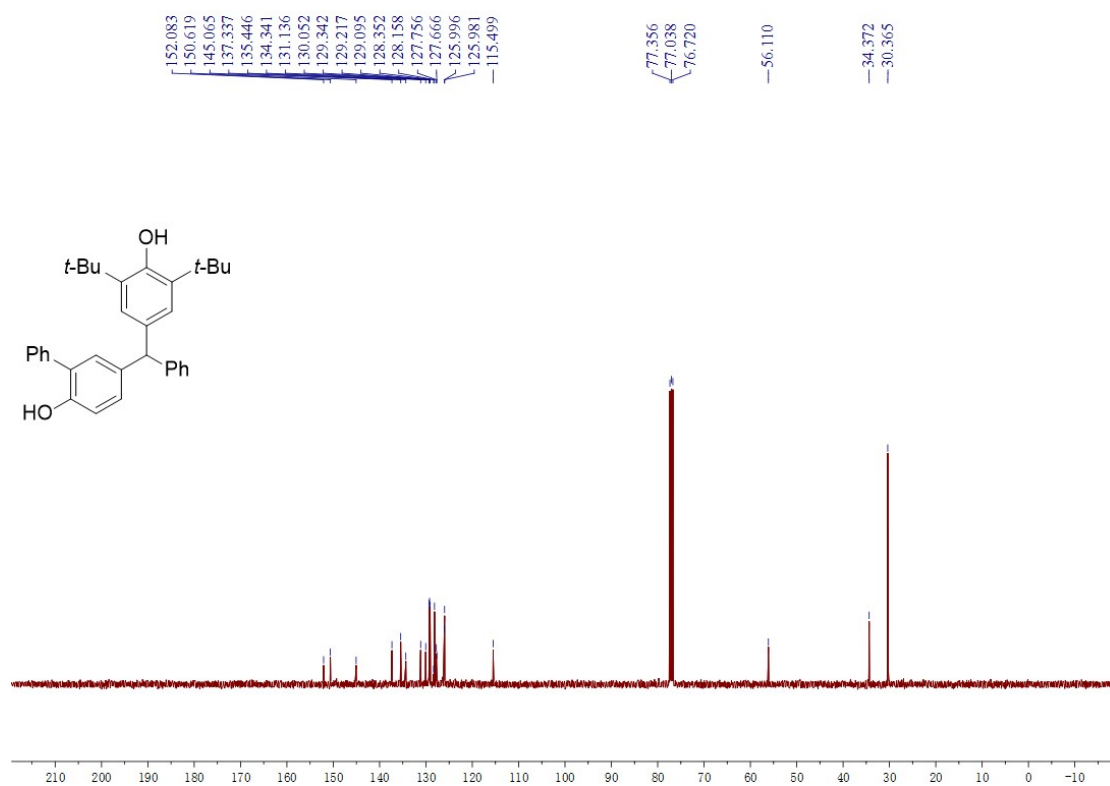

**2,6-Di-tert-butyl-4-((4-hydroxy-3-isopropylphenyl)(phenyl)methyl)phenol (6h)**



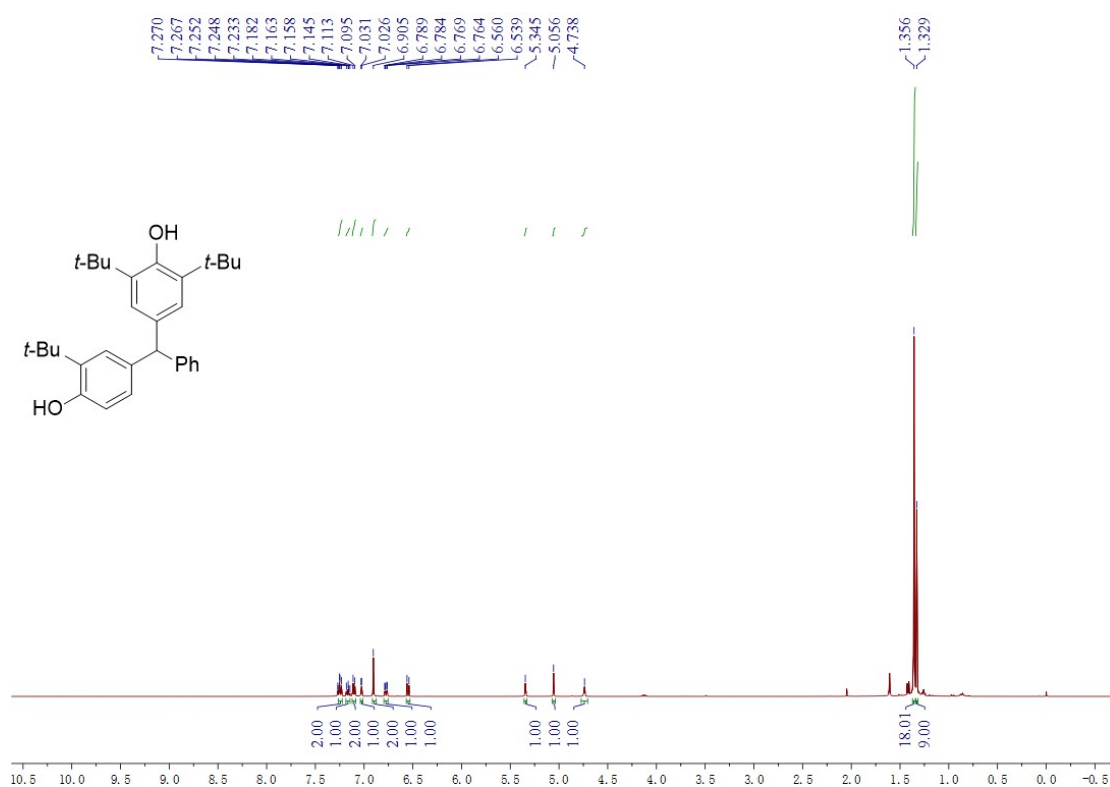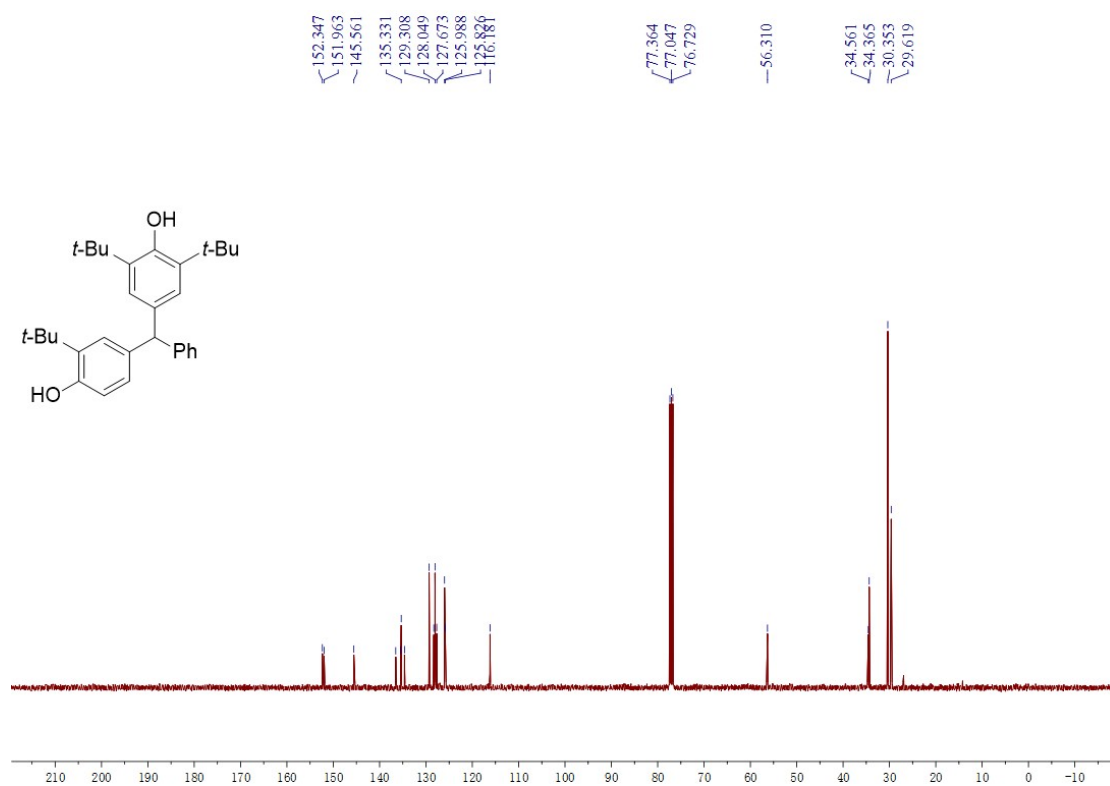

**2,6-Di-tert-butyl-4-((4-hydroxy-3,5-dimethylphenyl)(phenyl)methyl)phenol (6j)**

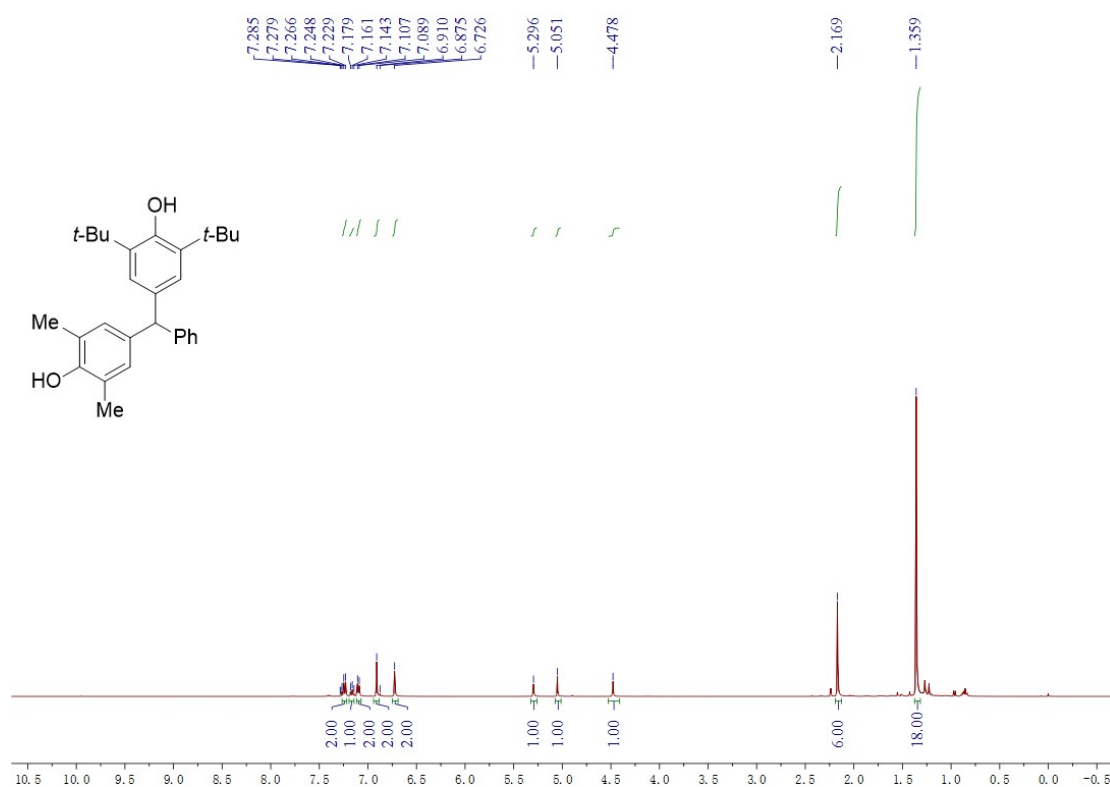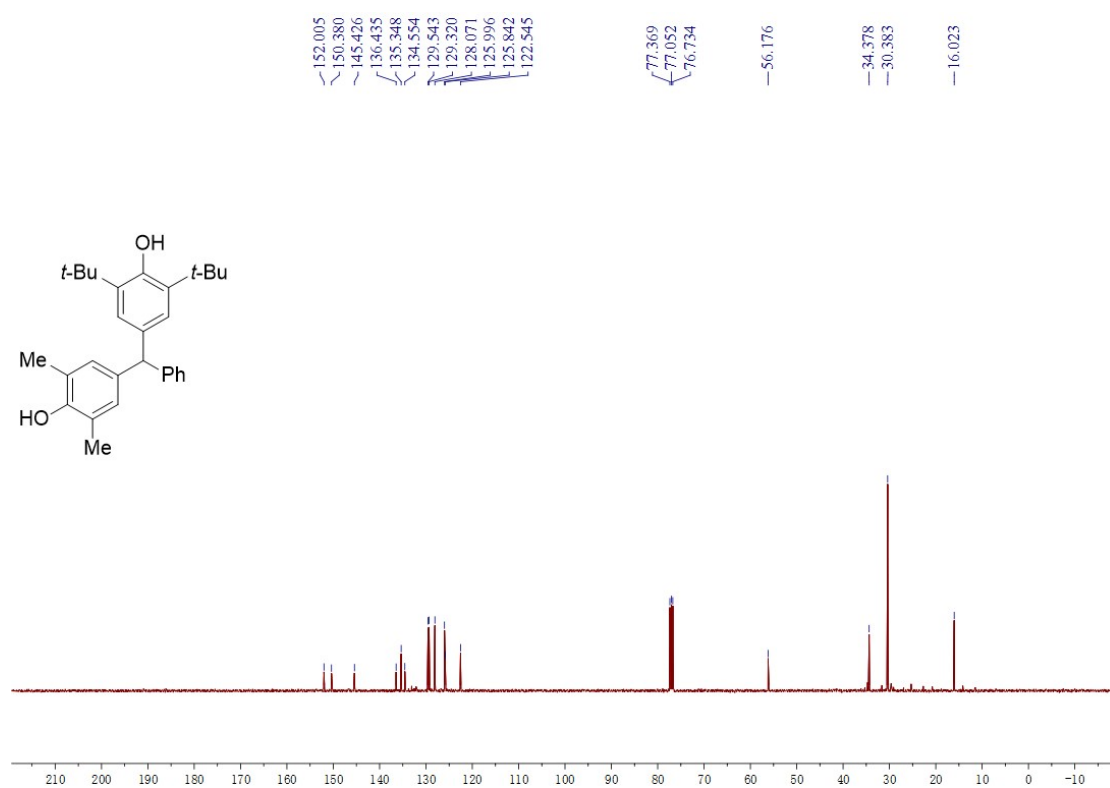

**2,6-Di-tert-butyl-4-((4-hydroxy-3,5-diisopropylphenyl)(phenyl)methyl)phenol (6k)**

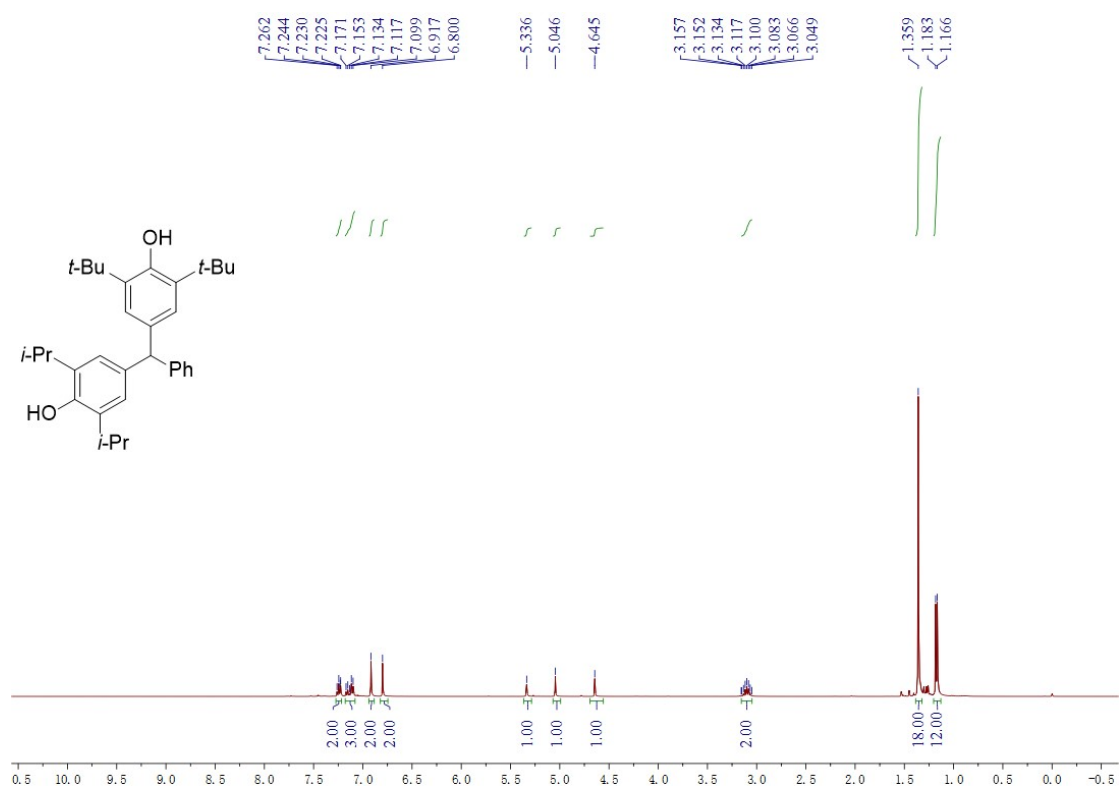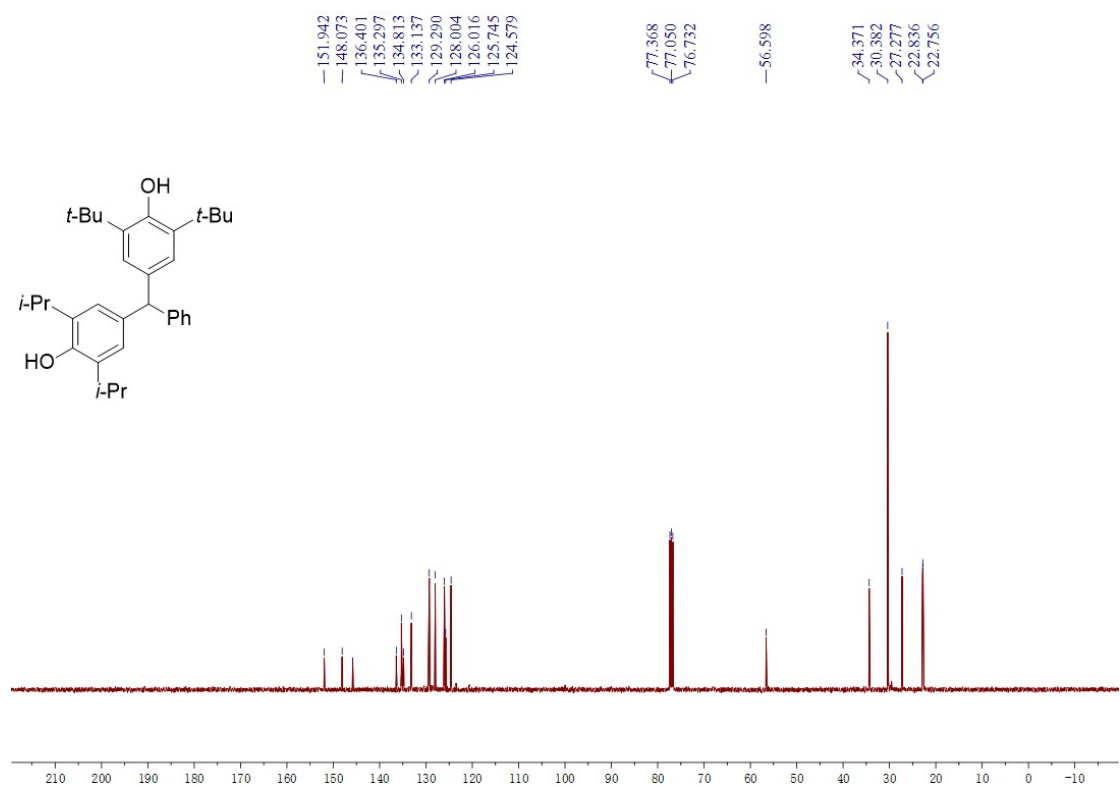

**2,6-Di-tert-butyl-4-((4-hydroxy-3,5-dimethoxyphenyl)(phenyl)methyl)phenol (6l)**

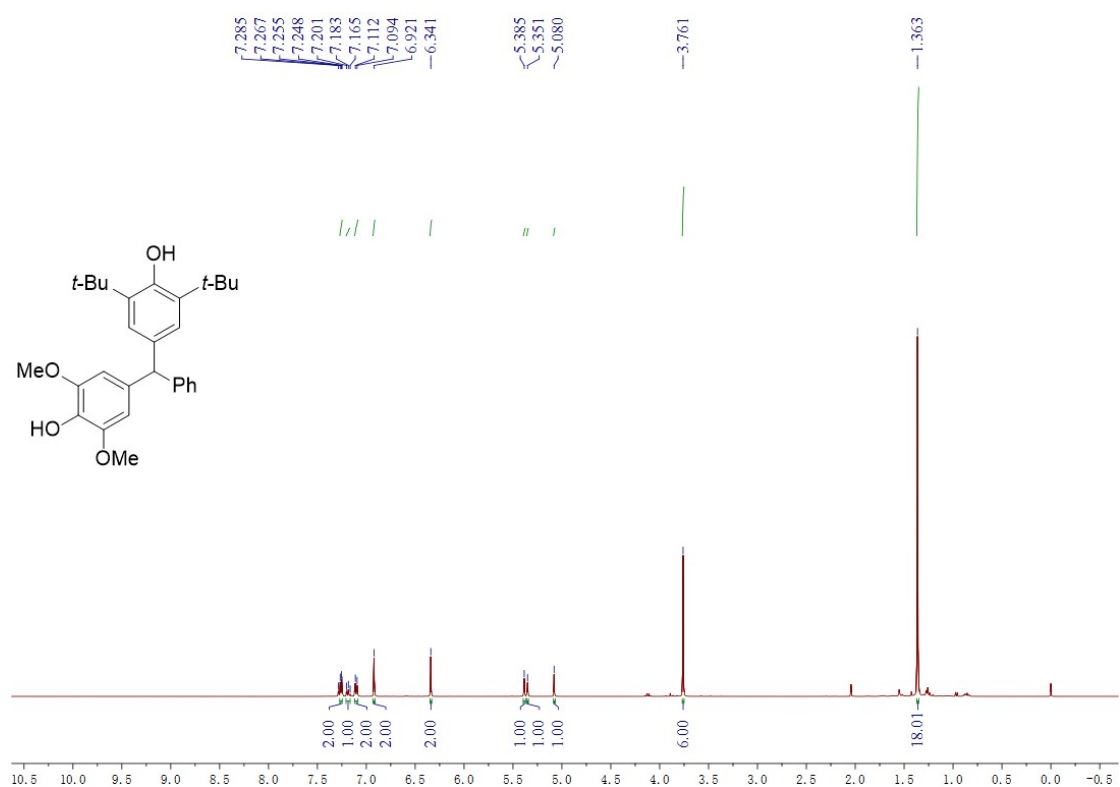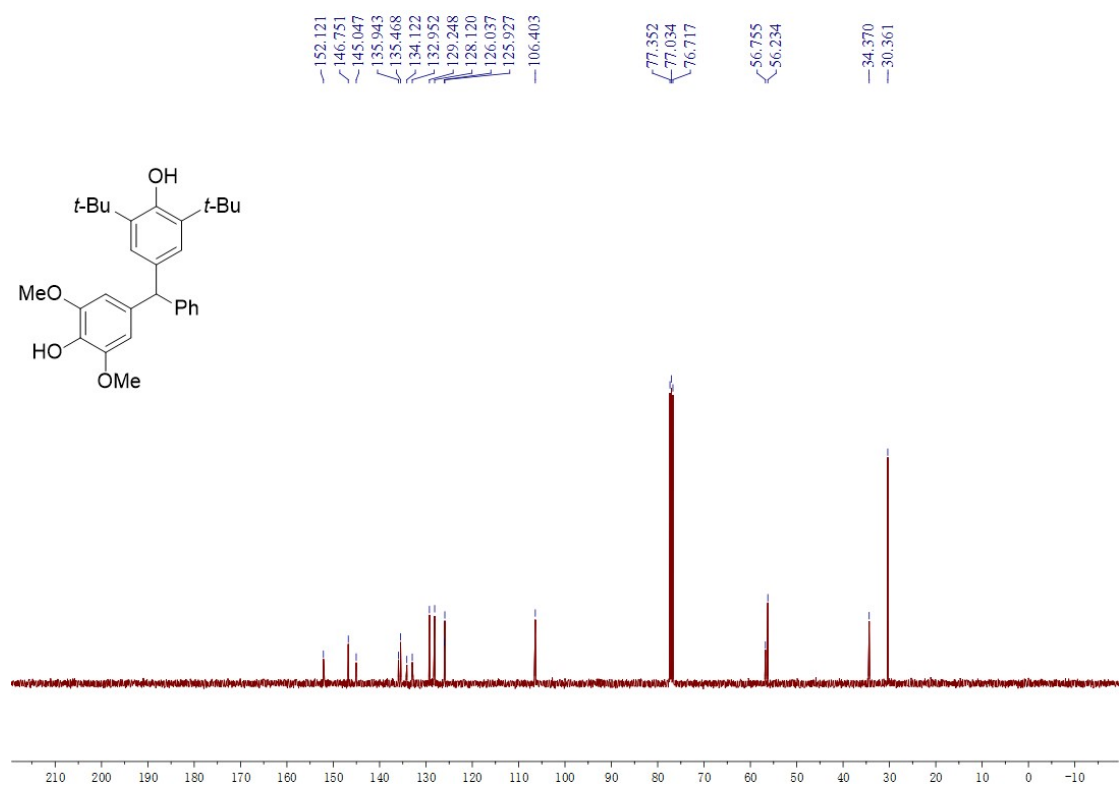

**4-((3,5-Di-*tert*-butyl-4-hydroxyphenyl)(phenyl)methyl)-5-isopropyl-2-methylphenol  
(6m)**

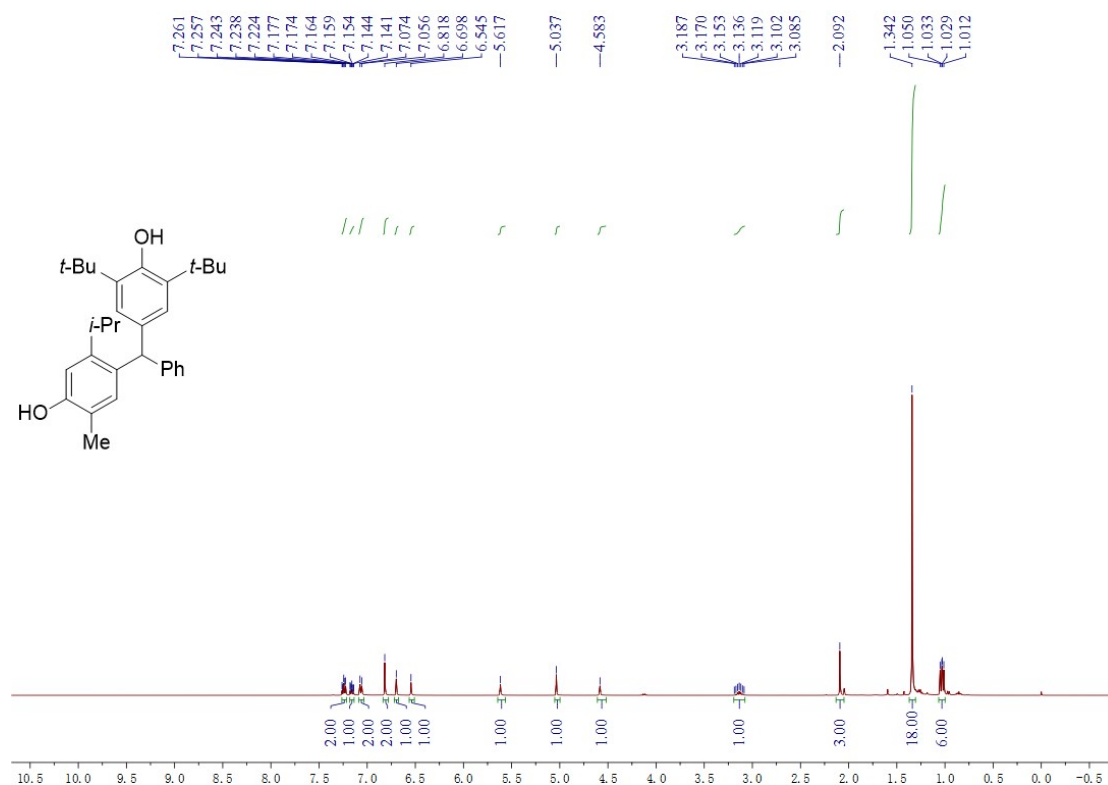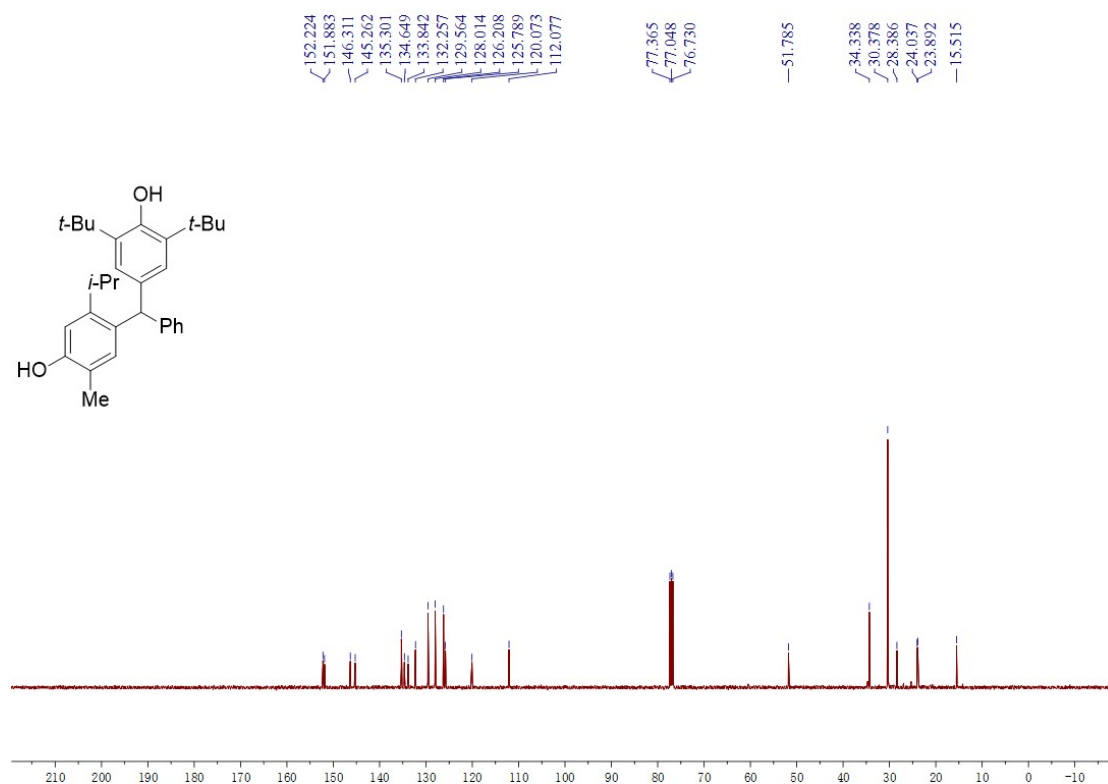

**2,6-Di-*tert*-butyl-4-((3-fluoro-4-hydroxyphenyl)(phenyl)methyl)phenol (6n)**

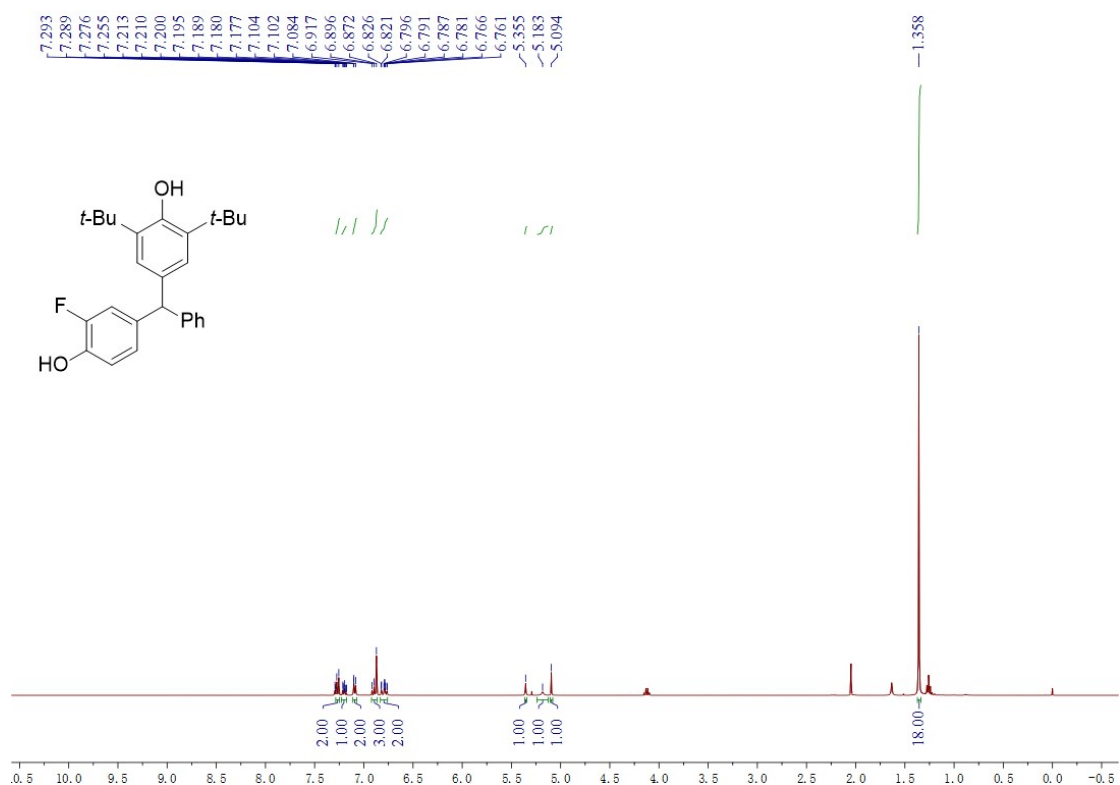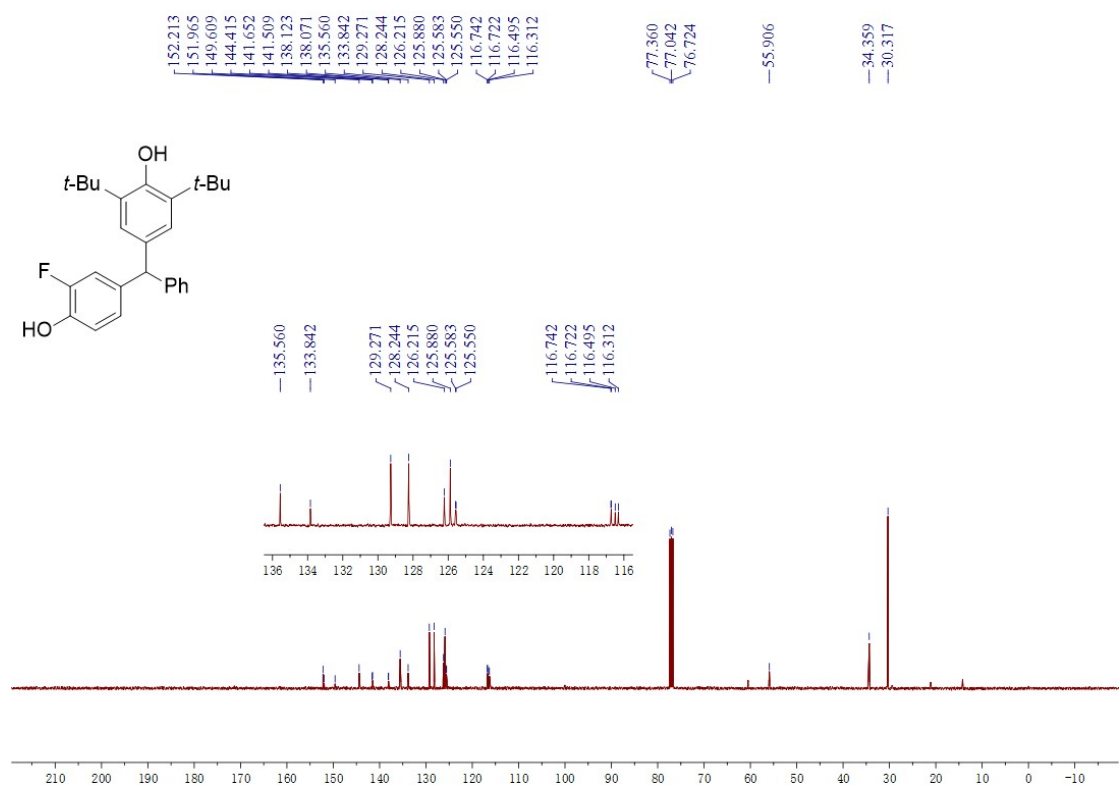



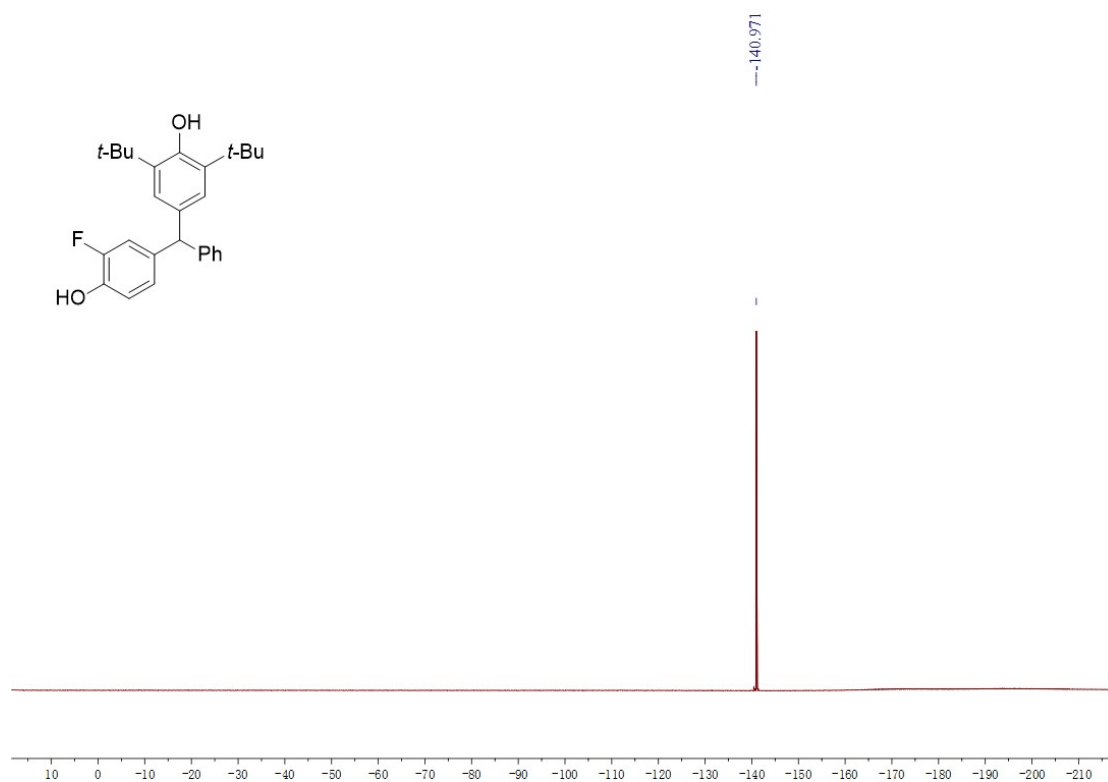

**4-((2-Bromo-4-hydroxyphenyl)(phenyl)methyl)-2,6-di-tert-butylphenol (60)**

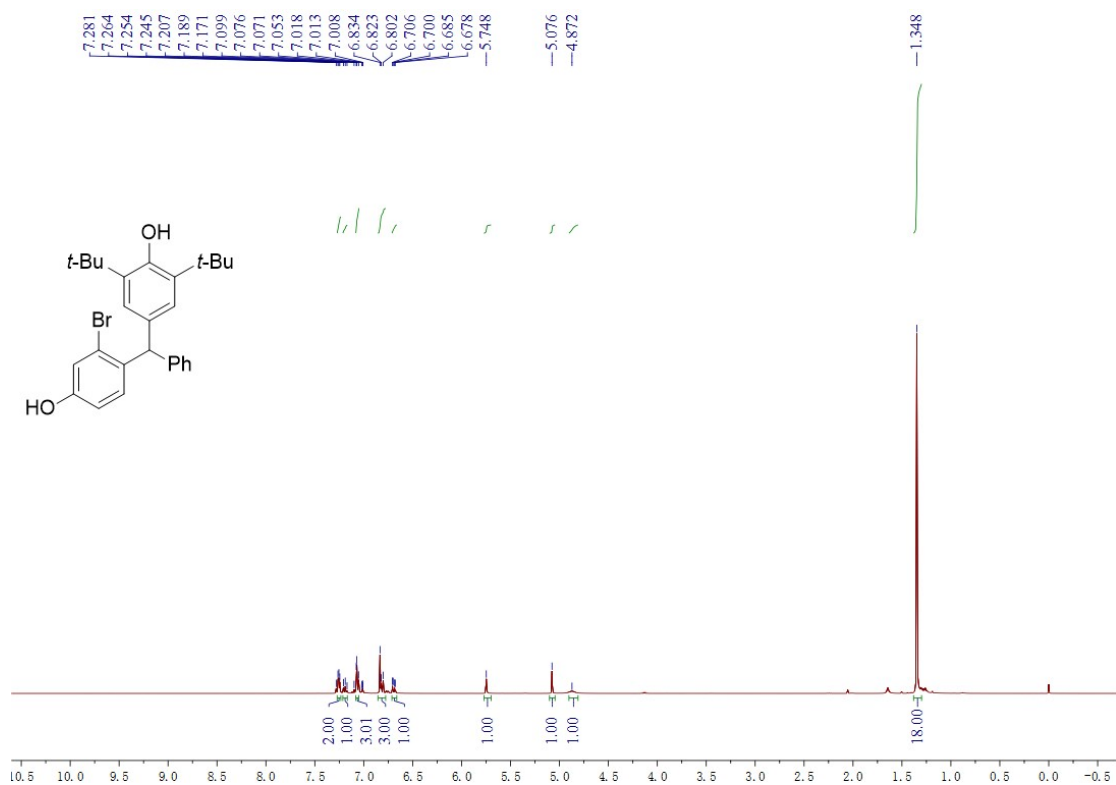

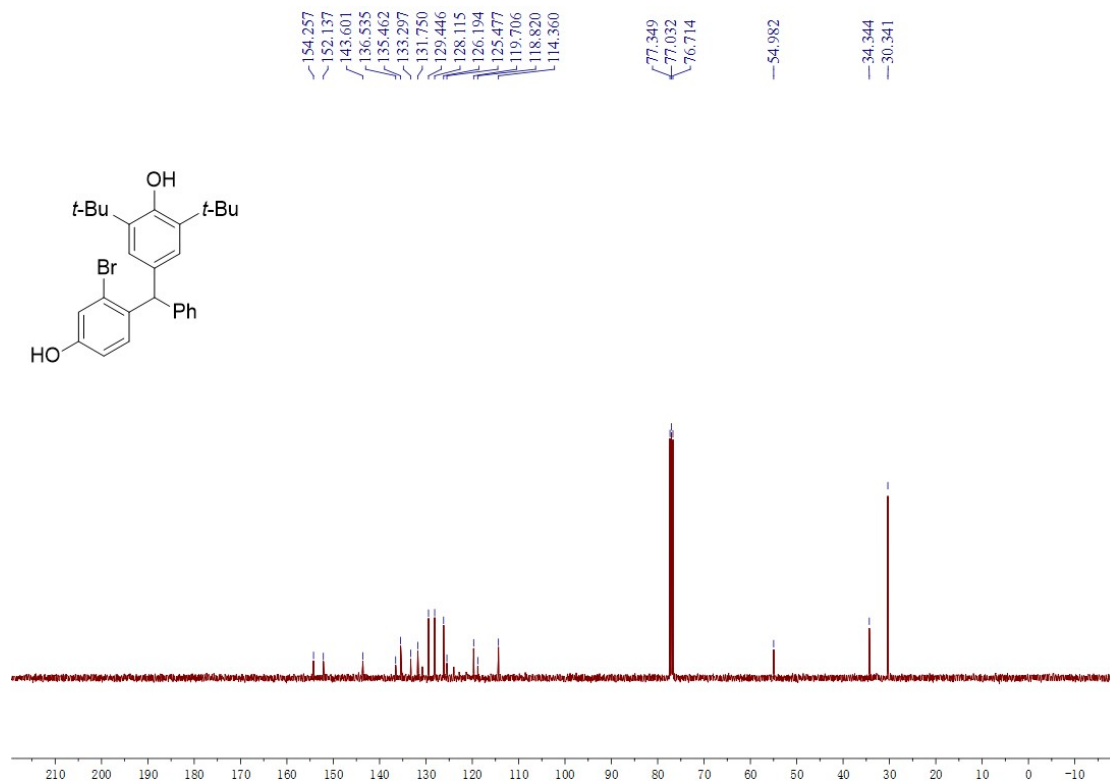

**2,6-Di-tert-butyl-4-((4-hydroxy-2-iodophenyl)(phenyl)methyl)phenol (6p)**

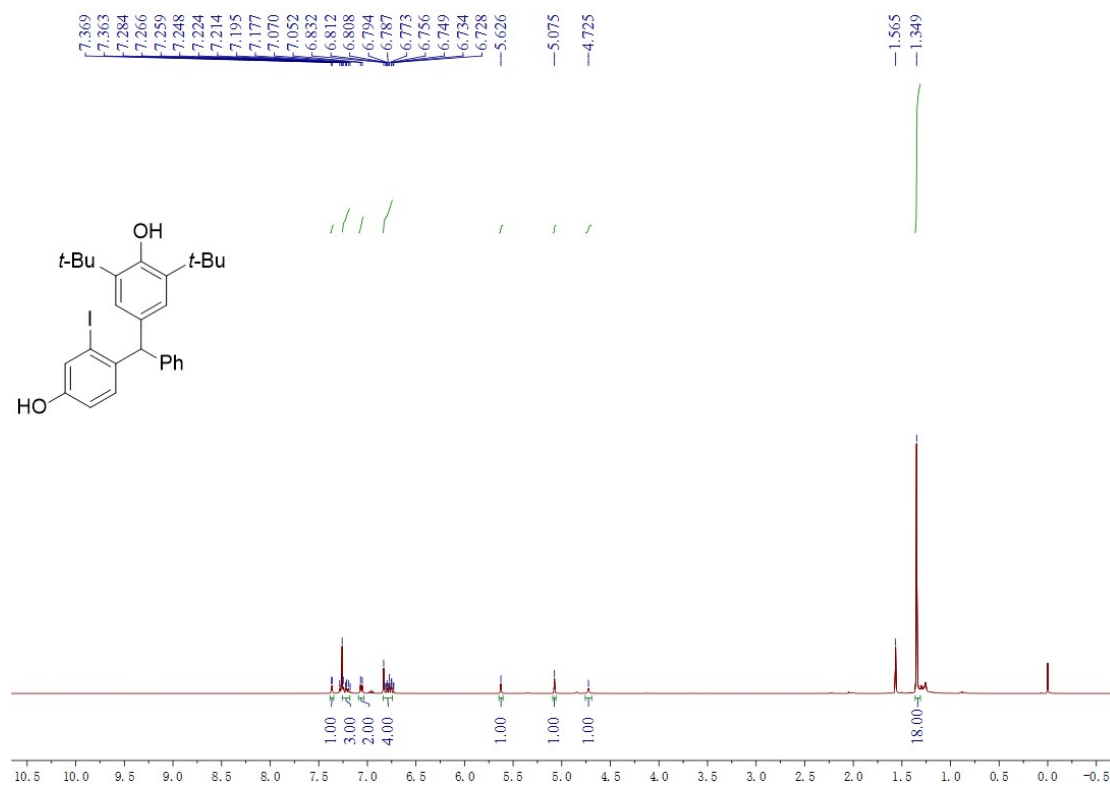

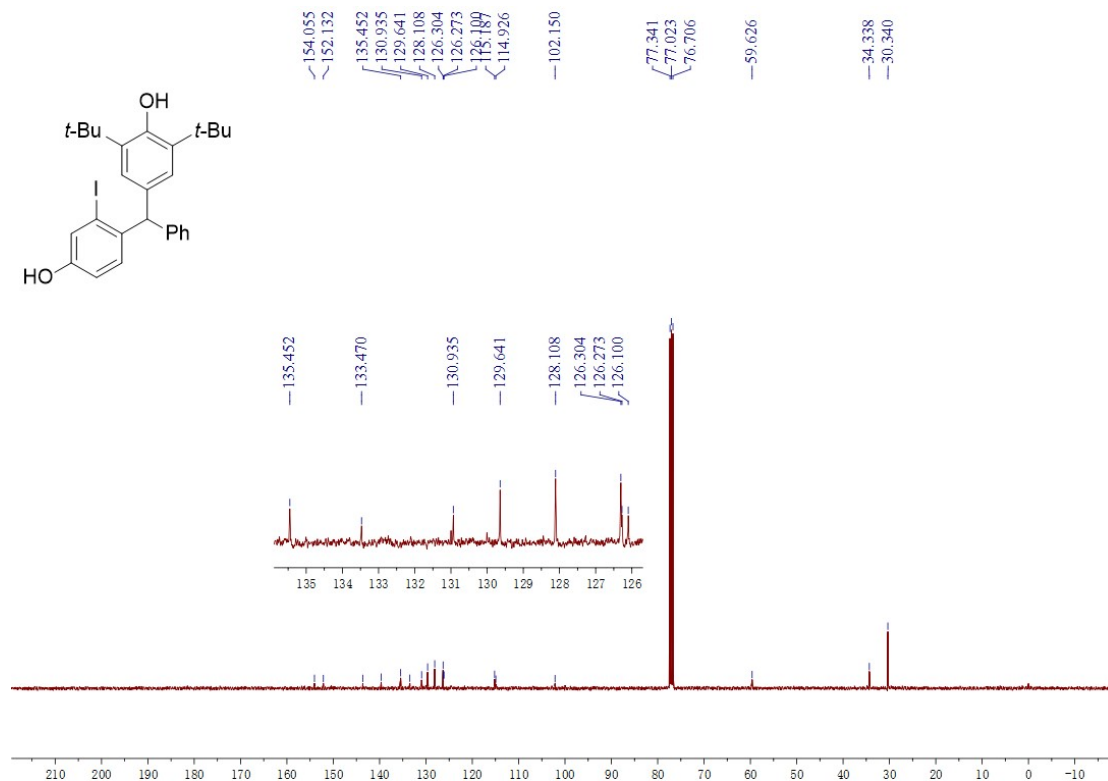

**3-Bromo-4-((3,5-di-tert-butyl-4-hydroxyphenyl)(phenyl)methyl)-2-fluorophenol (6q)**

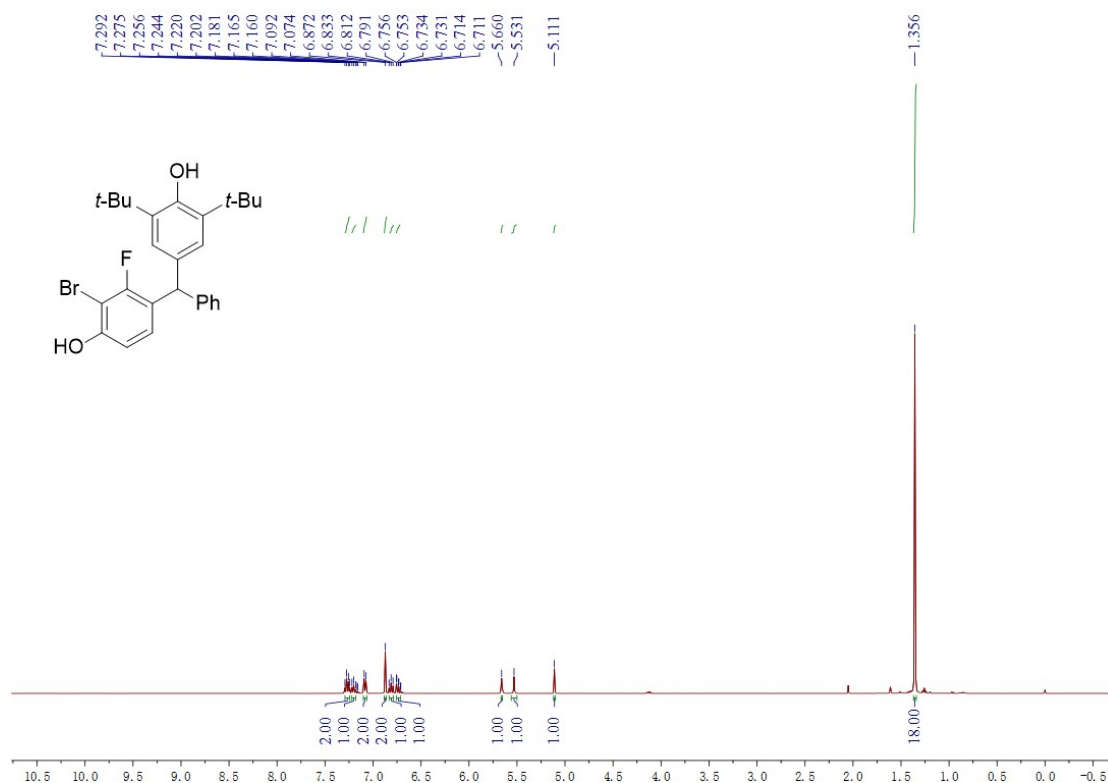

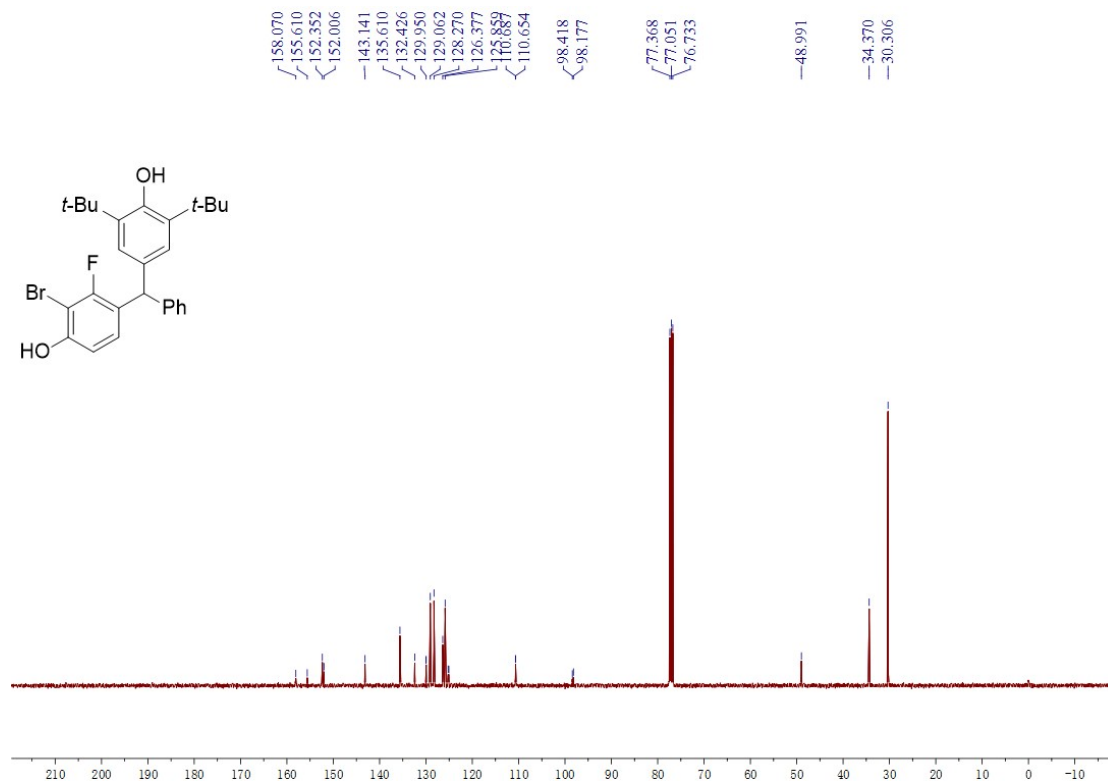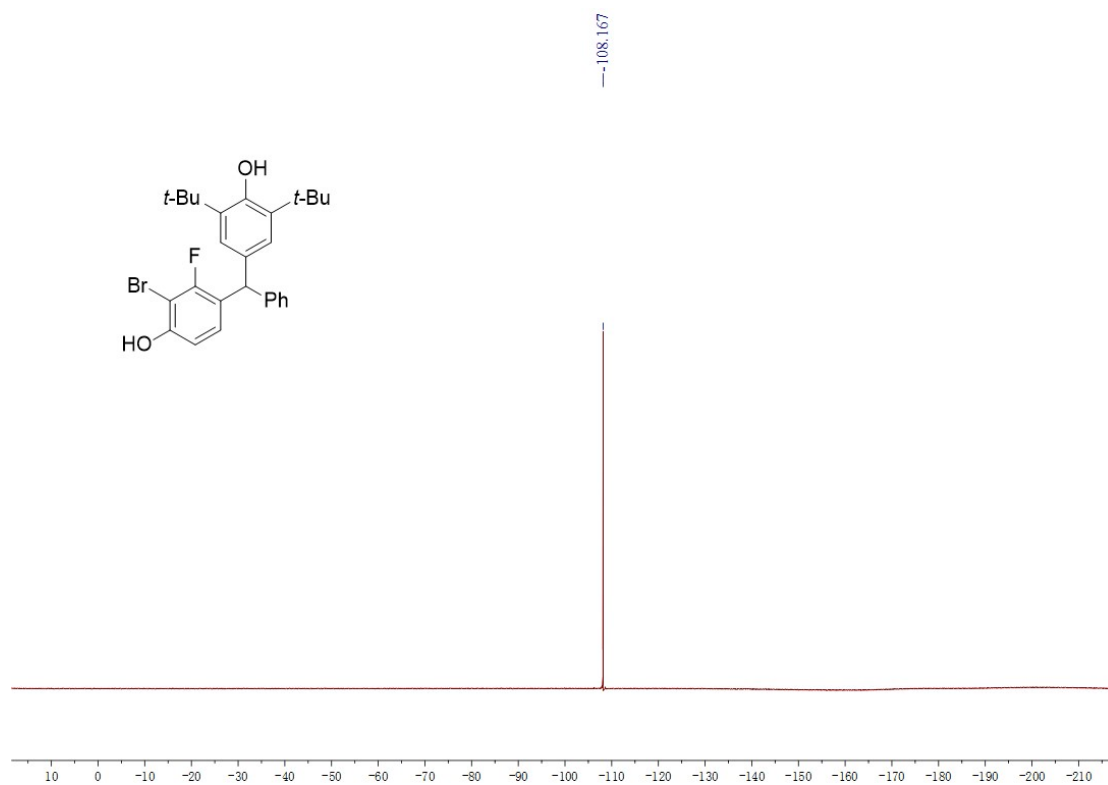

**2,5-Dibromo-4-((3,5-di-tert-butyl-4-hydroxyphenyl)(phenyl)methyl)phenol (6r)**

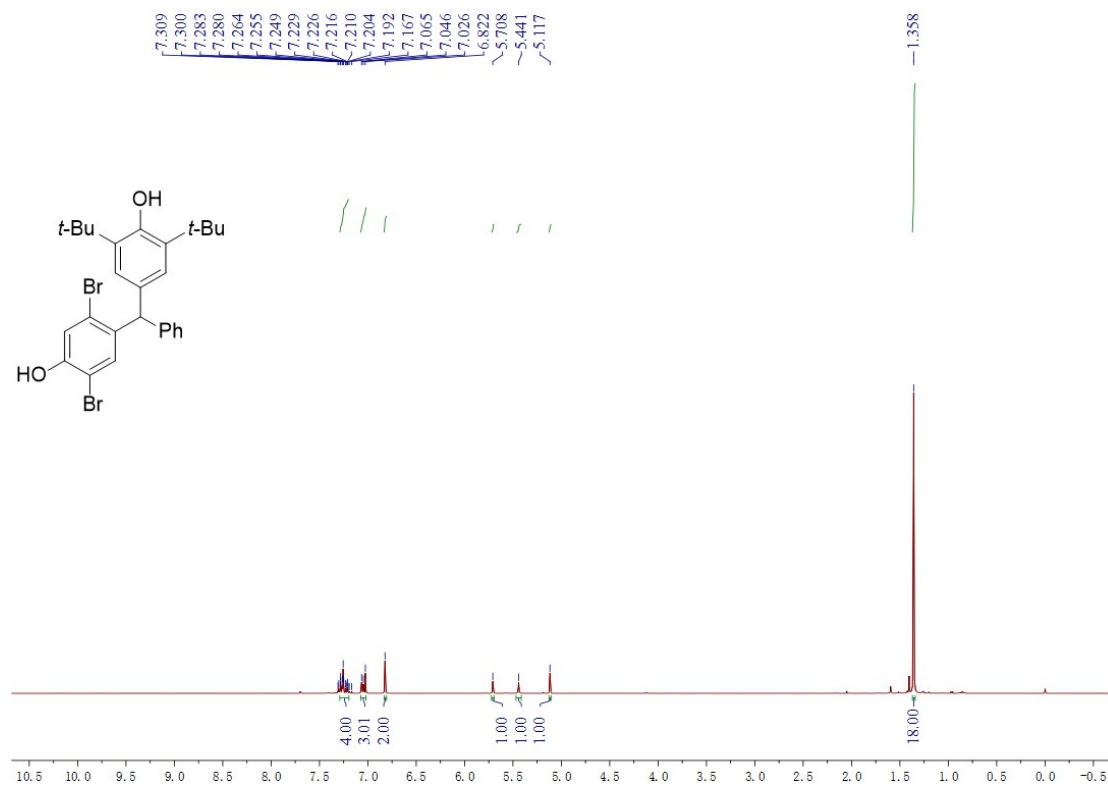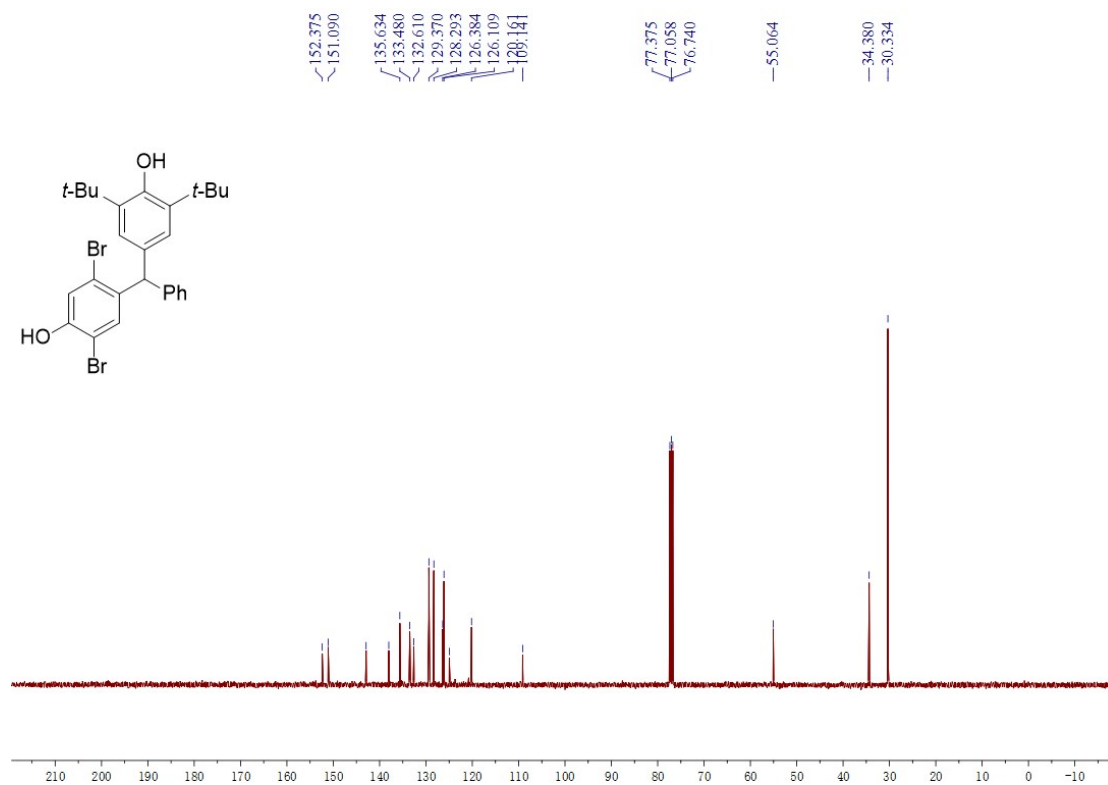

**4-((3,5-Di-*tert*-butyl-4-hydroxyphenyl)(phenyl)methyl)-2-fluoro-5-methylphenol (6s)**

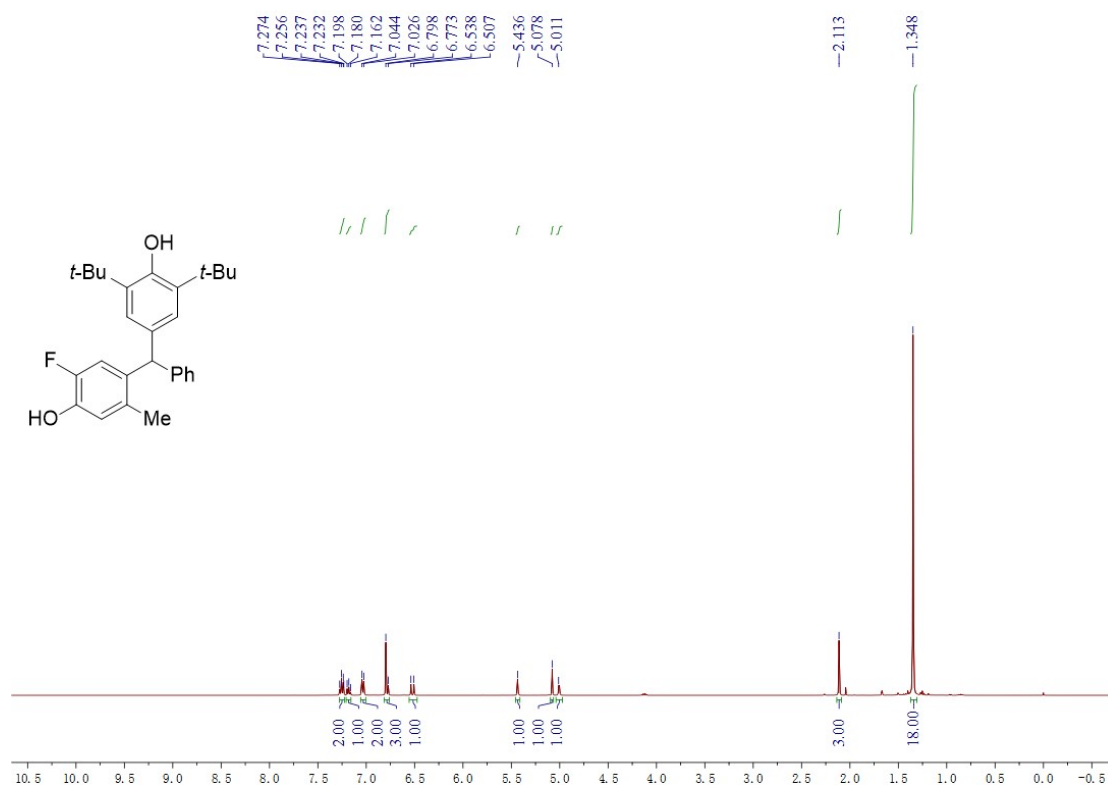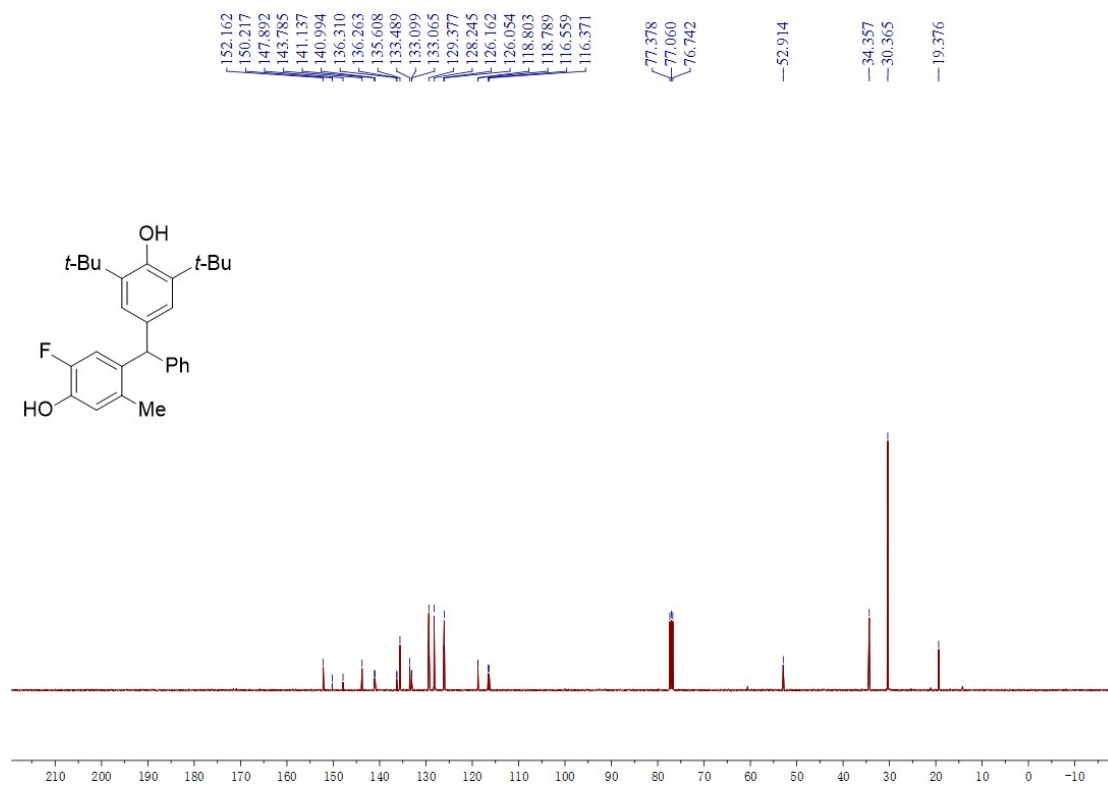

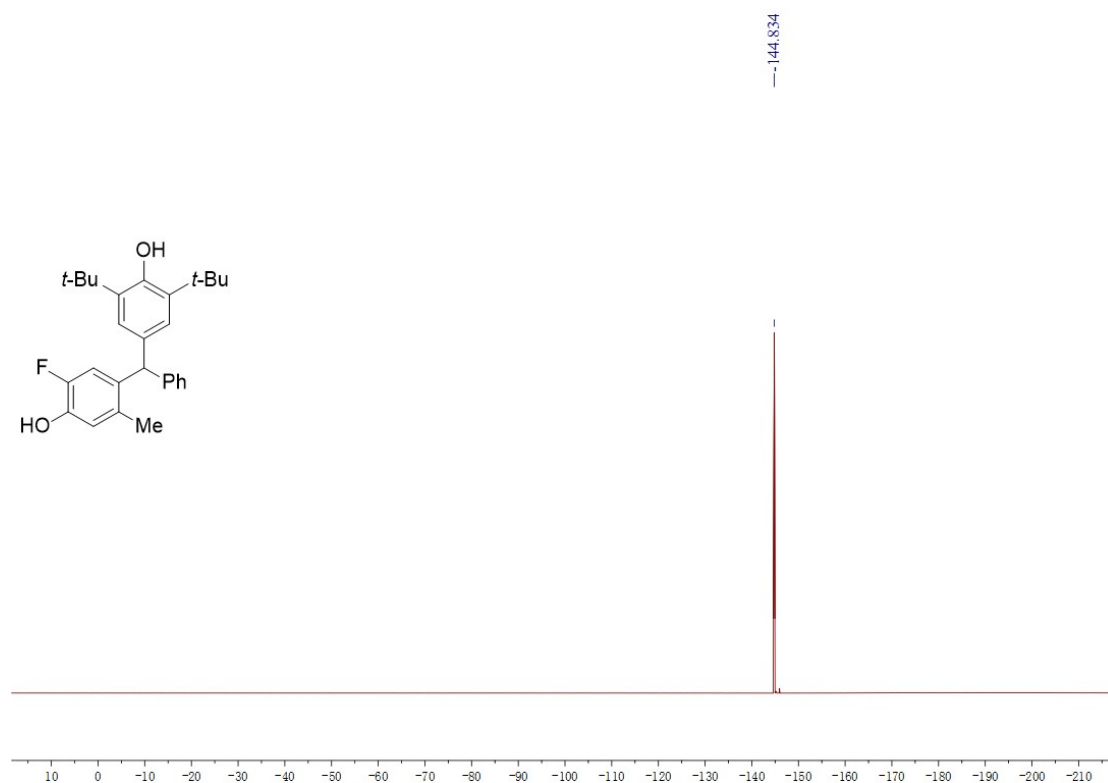

**5-Bromo-4-((3,5-di-tert-butyl-4-hydroxyphenyl)(phenyl)methyl)-2-methoxyphenol (6t)**

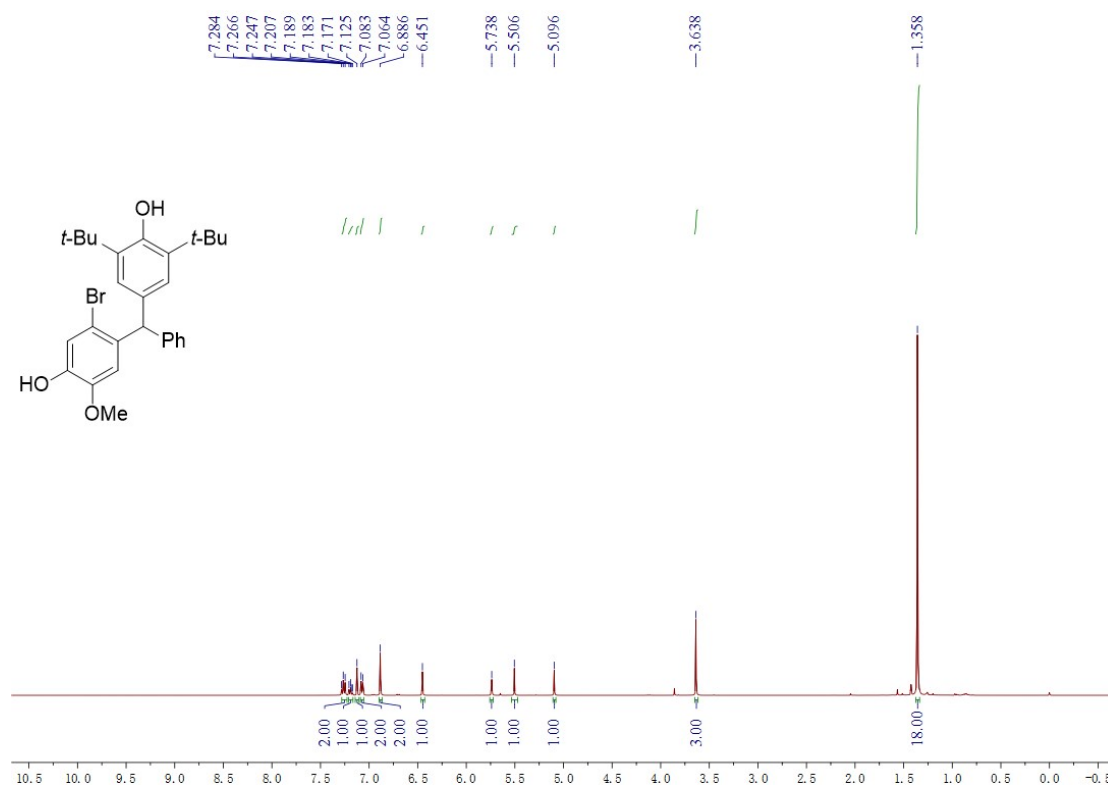

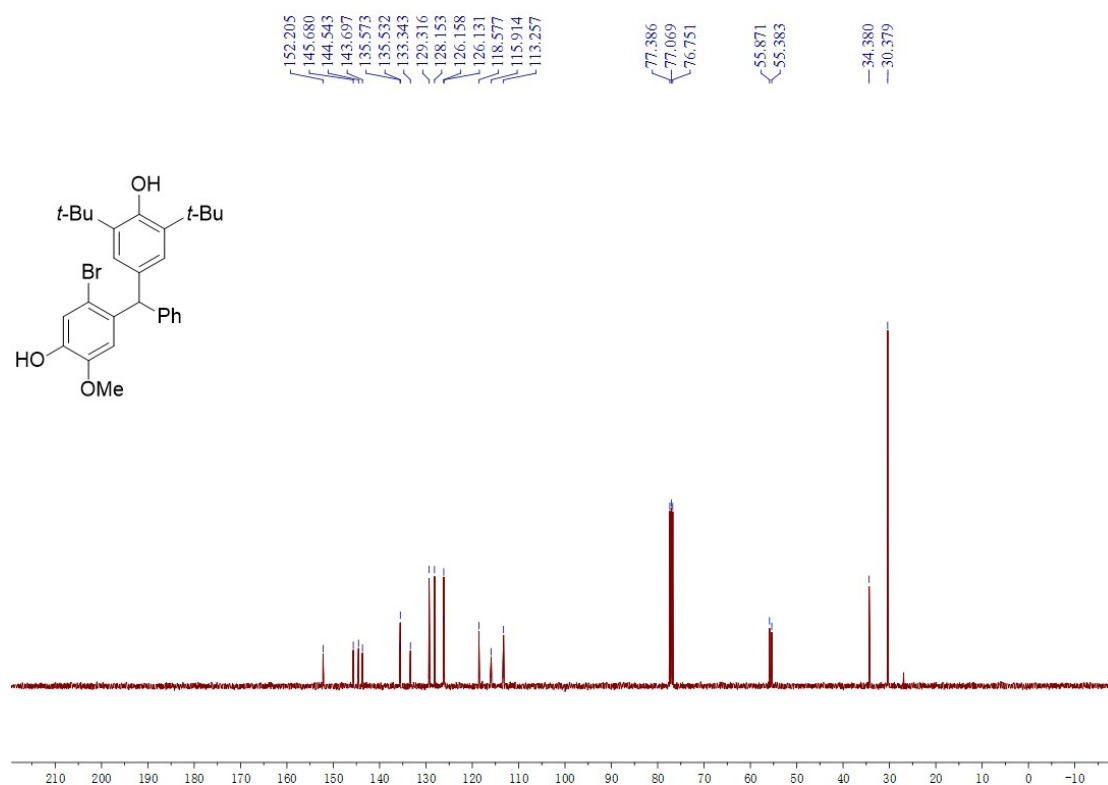

**2-((3,5-Di-tert-butyl-4-hydroxyphenyl)(phenyl)methyl)naphthalen-1-ol (6u)**

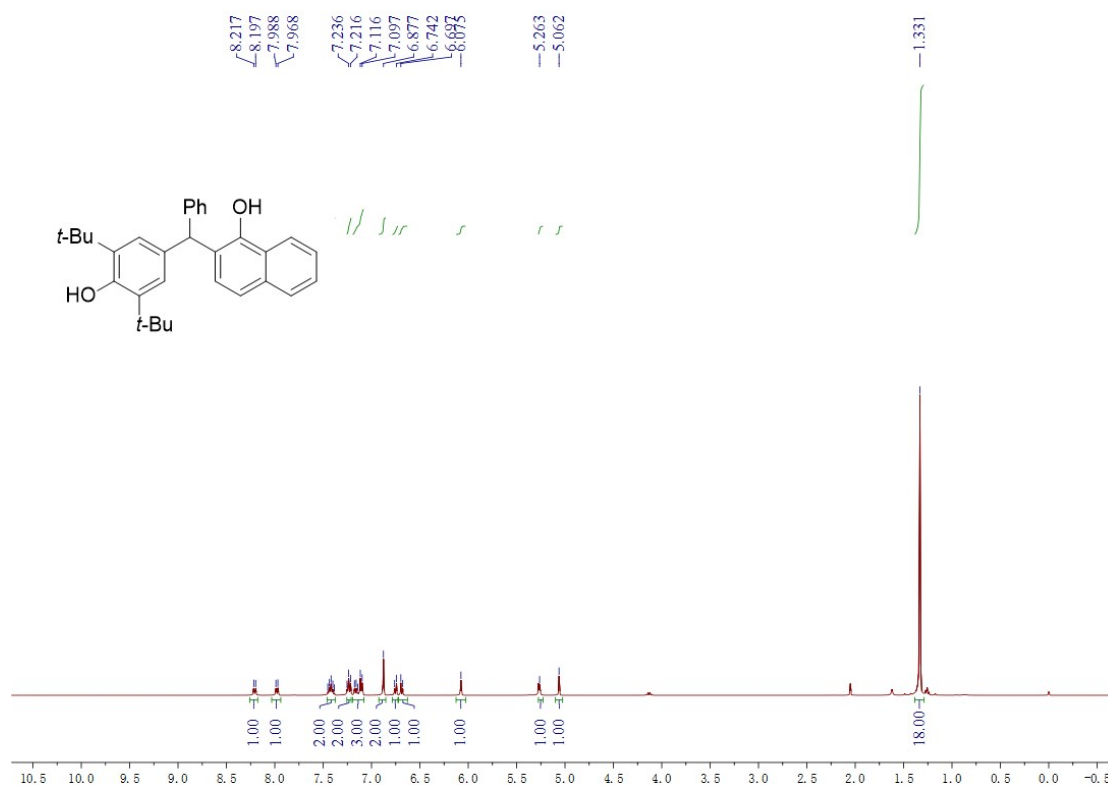



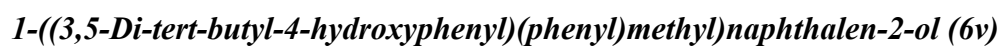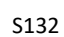

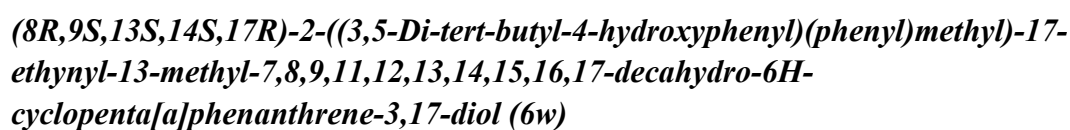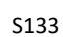

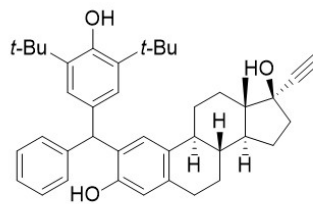

Chemical structure of compound 10 is shown. The <sup>1</sup>H NMR spectrum (CDCl<sub>3</sub>) displays peaks from 0 to 10.5 ppm. Key features include a broad singlet at ~7.1 ppm (OH), aromatic signals between 6.5-7.5 ppm, aliphatic signals between 1.0-2.5 ppm, and a large solvent peak at 7.26 ppm. Integration values are provided below the baseline.

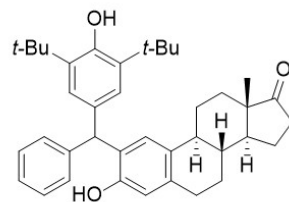

Chemical structure of 2,6-di-*t*-butyl-4-(1-(4-*i*-propylphenyl)-2-hydroxyethyl)phenol (1) is shown. The structure features a central biphenyl core with two hydroxyl groups at the 2 and 6 positions of the central ring, and two *t*-butyl groups at the 4 and 4' positions. The 1-position of the central ring is substituted with a 1-(4-*i*-propylphenyl)-2-hydroxyethyl group. The chemical shift values (ppm) for the protons are listed below the structure, grouped by color-coded brackets: blue for aromatic protons, green for aliphatic protons, and red for the *i*-propyl group protons.

Chemical shift values (ppm):

- Aromatic protons (blue): 7.314, 7.296, 7.277, 7.245, 7.236, 7.222, 7.217, 7.212, 7.199, 7.186, 7.166, 7.163, 7.145, 7.130, 6.930, 6.732, 6.723, 6.720, 6.710, 6.700, 6.693, 5.564, 5.121, 4.632.
- Aliphatic protons (green): 2.883, 2.866, 2.849, 2.832, 2.814, 2.797, 2.780.
- i*-Propyl group protons (red): 1.354, 1.225, 1.208.

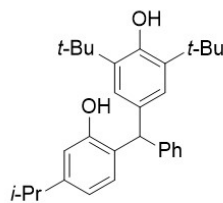

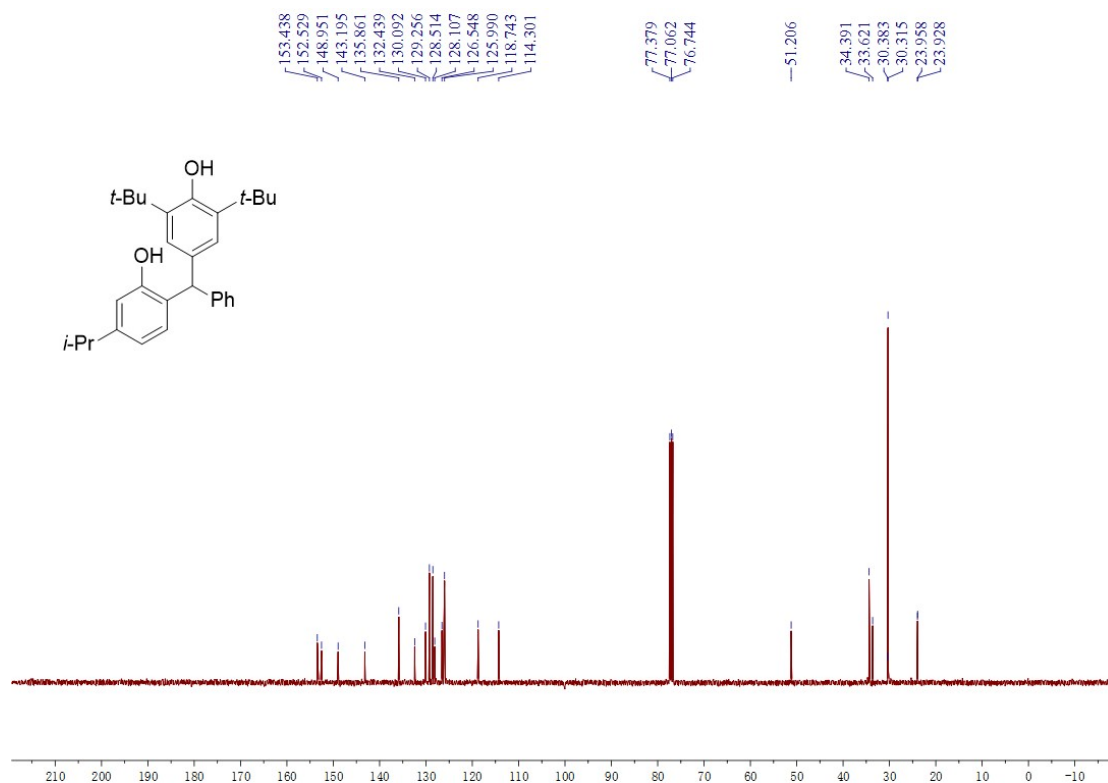

**2,6-Di-tert-butyl-4-((4-hydroxyphenyl)(p-tolyl)methyl)phenol (7a)**

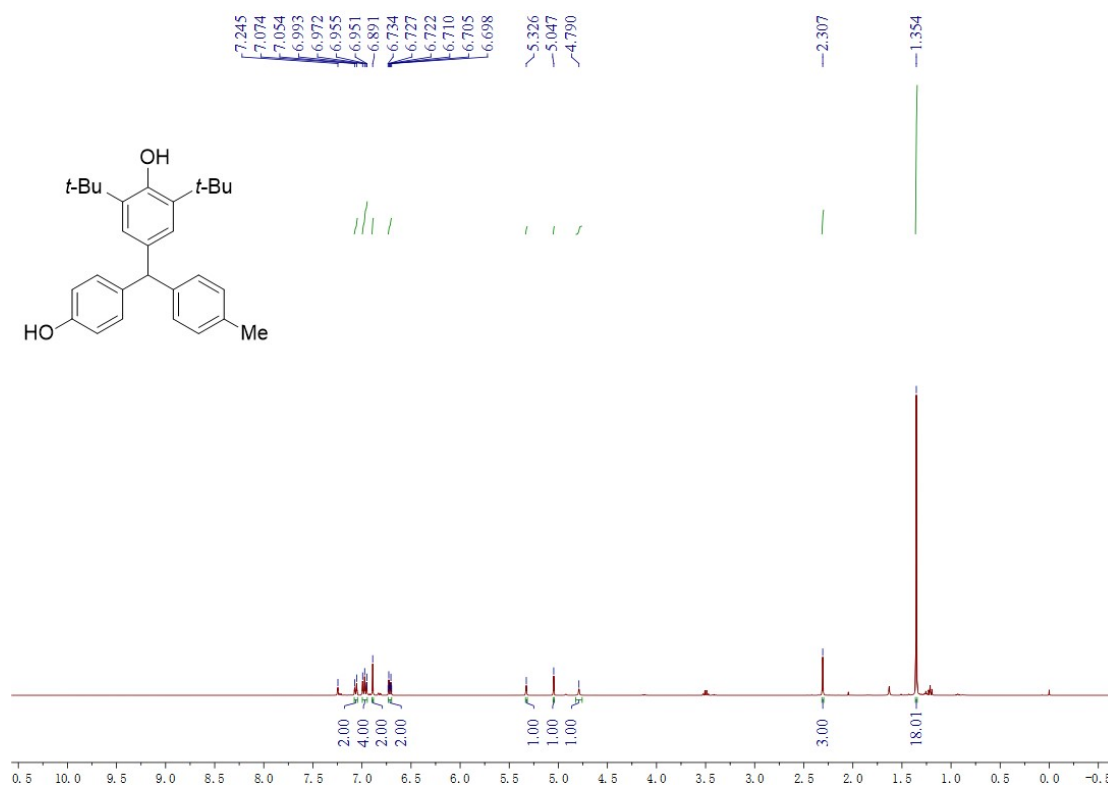

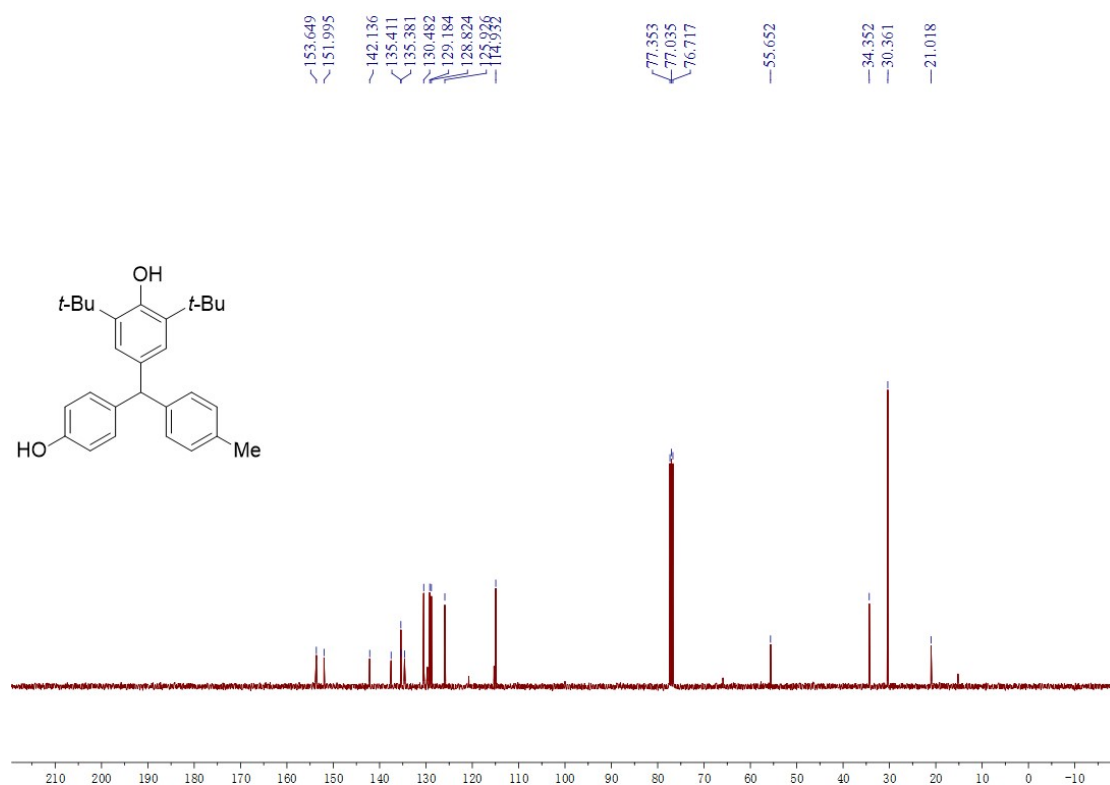

**2,6-Di-tert-butyl-4-((4-hydroxyphenyl)(o-tolyl)methyl)phenol (7b)**

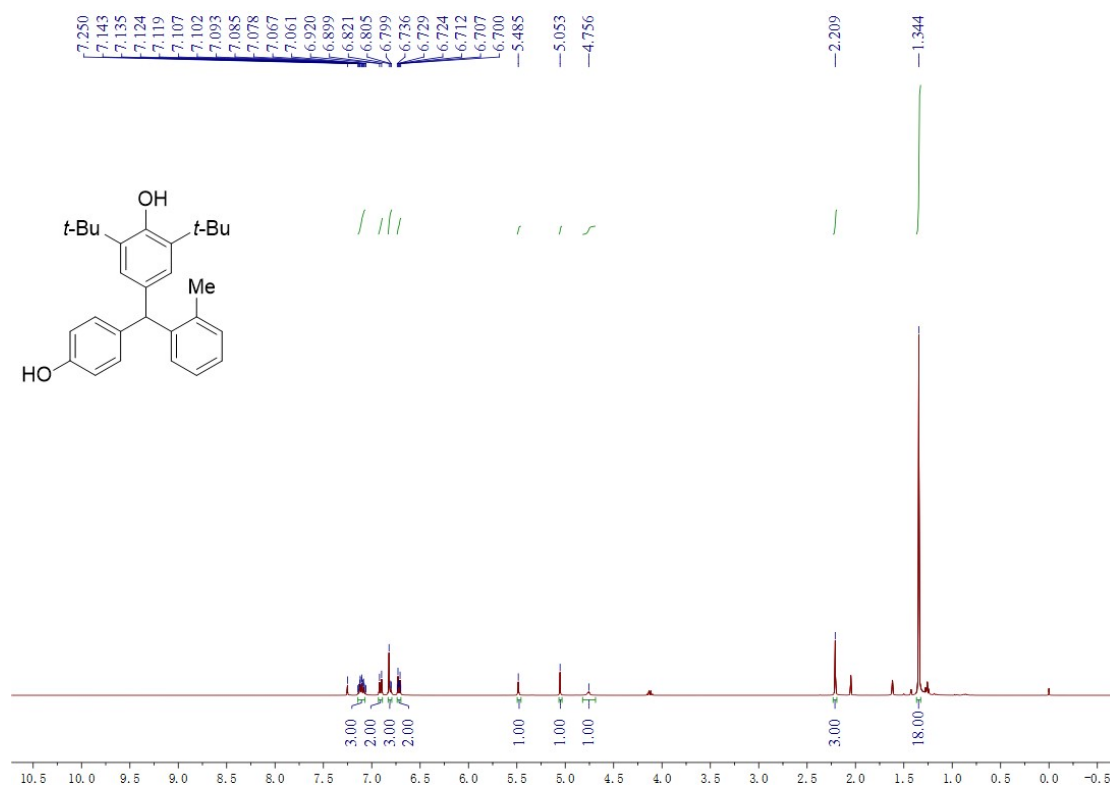

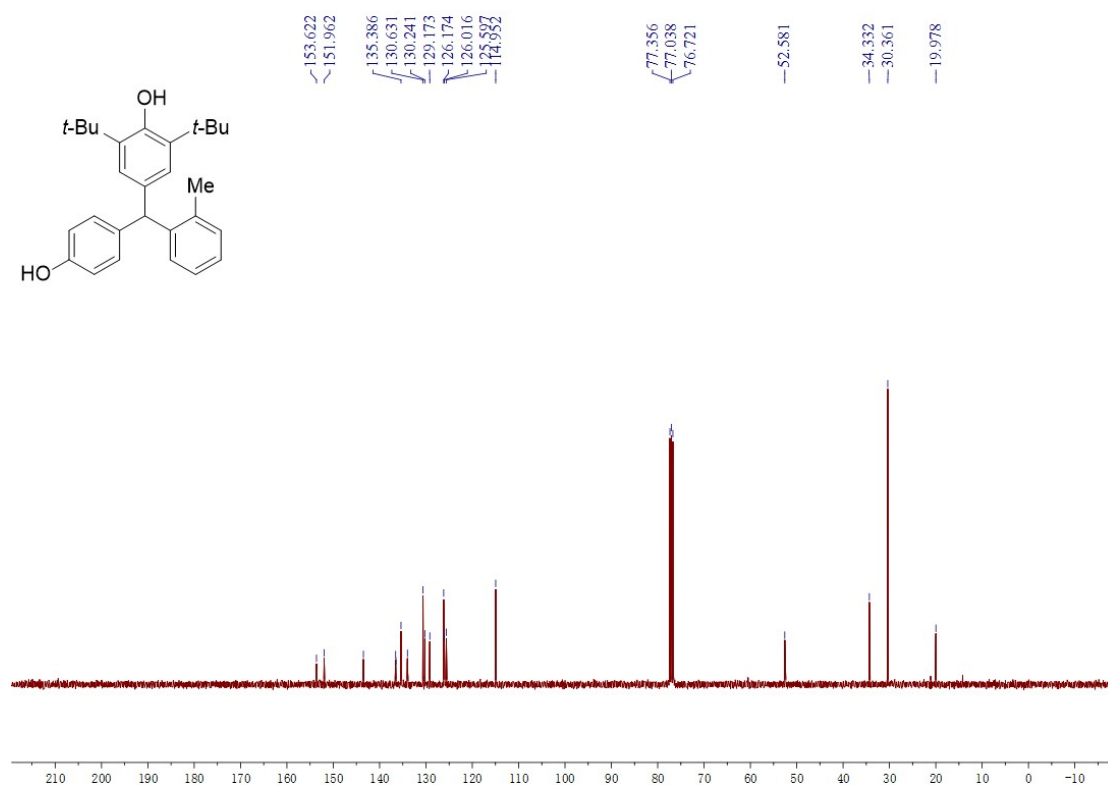

**2,6-Di-tert-butyl-4-((4-ethylphenyl)(4-hydroxyphenyl)methyl)phenol (7c)**

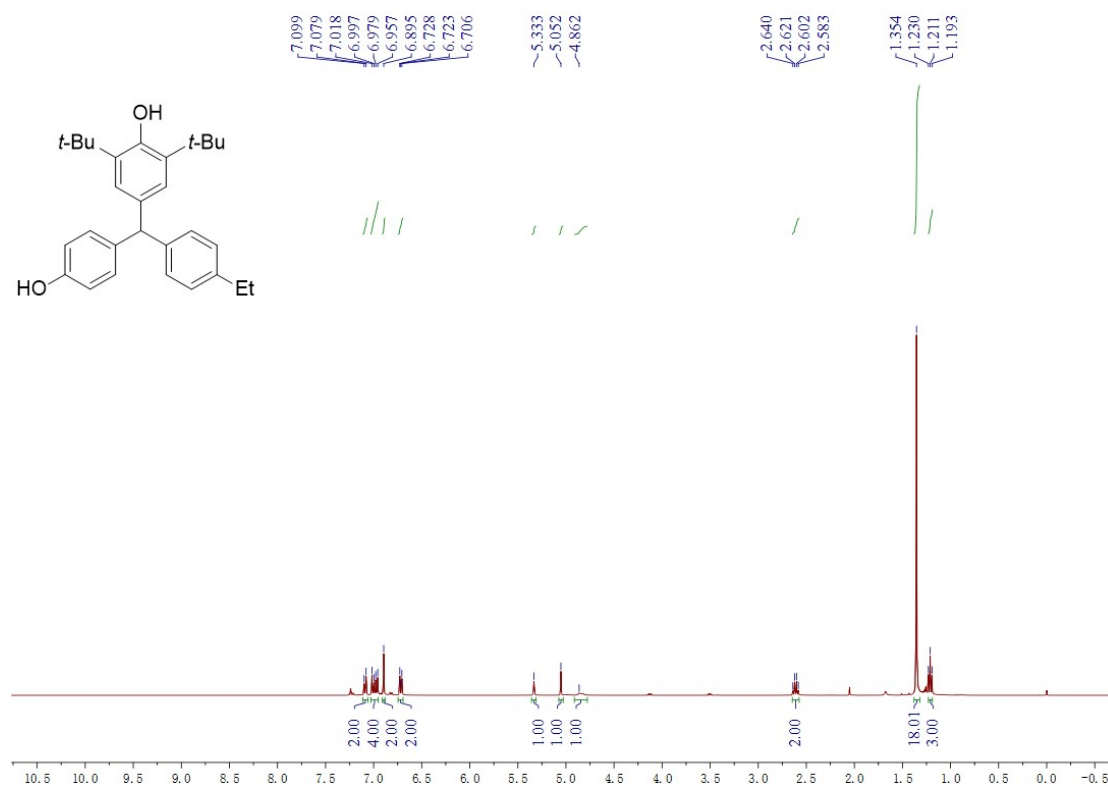

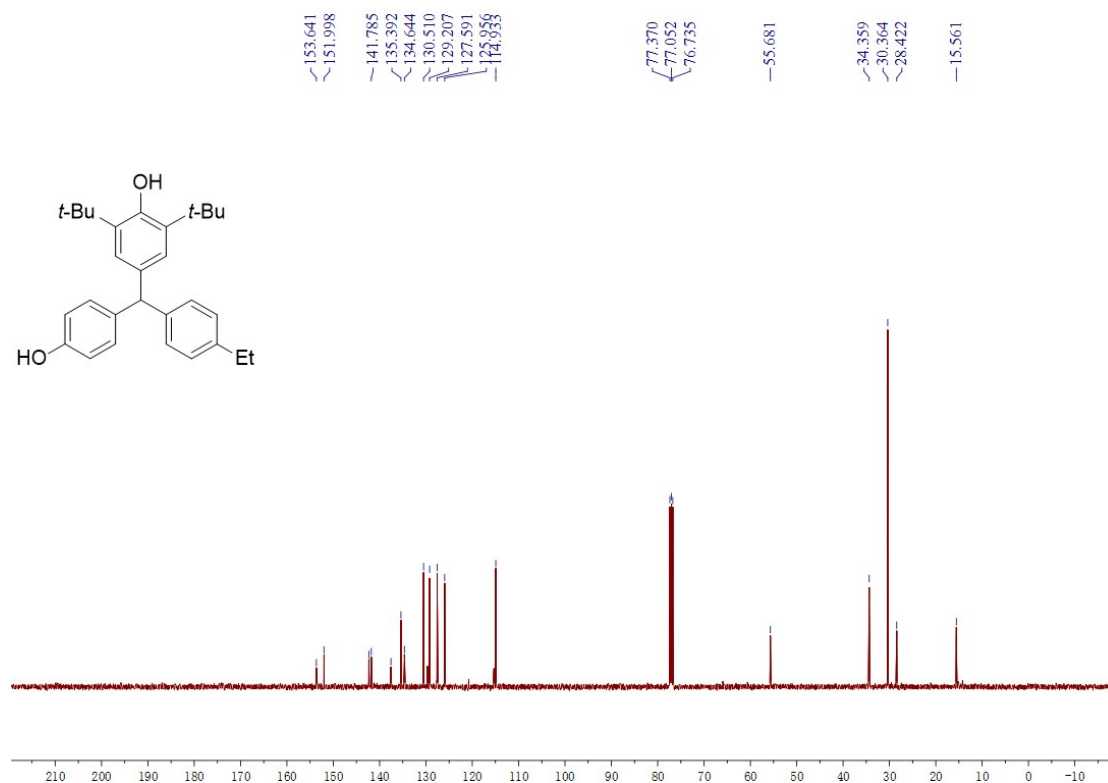

**2,6-Di-tert-butyl-4-((4-(tert-butyl)phenyl)(4-hydroxyphenyl)methyl)phenol (7d)**

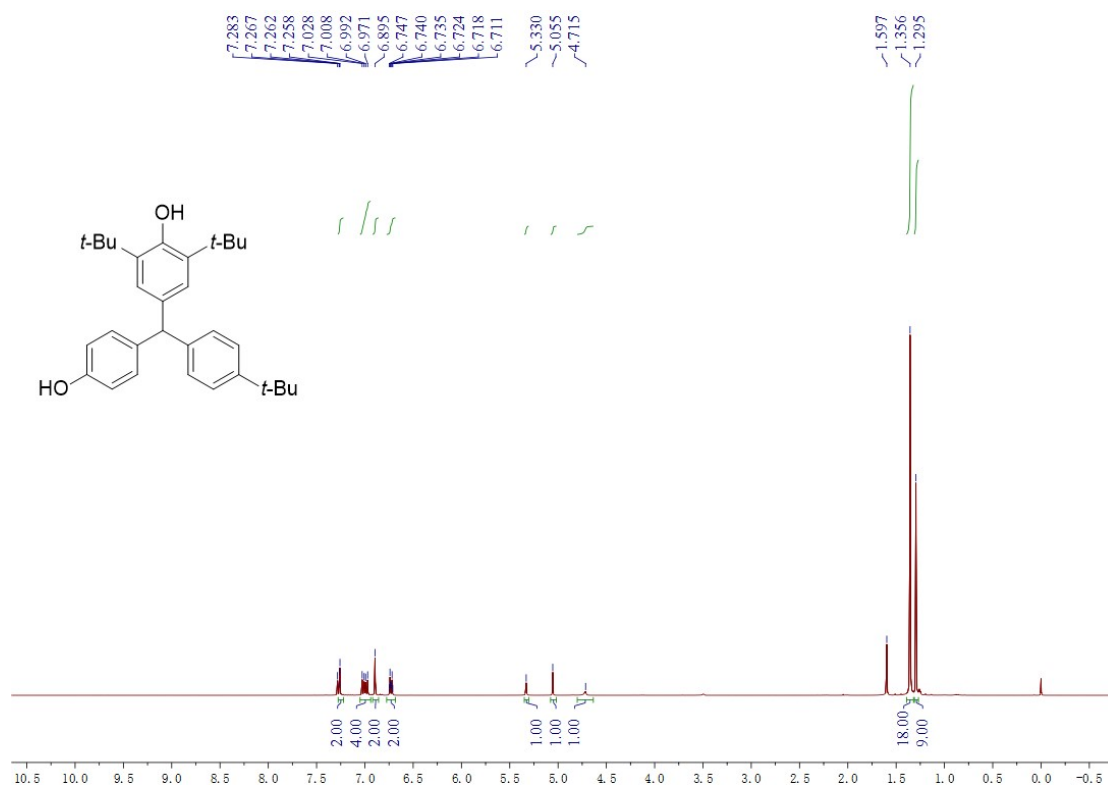



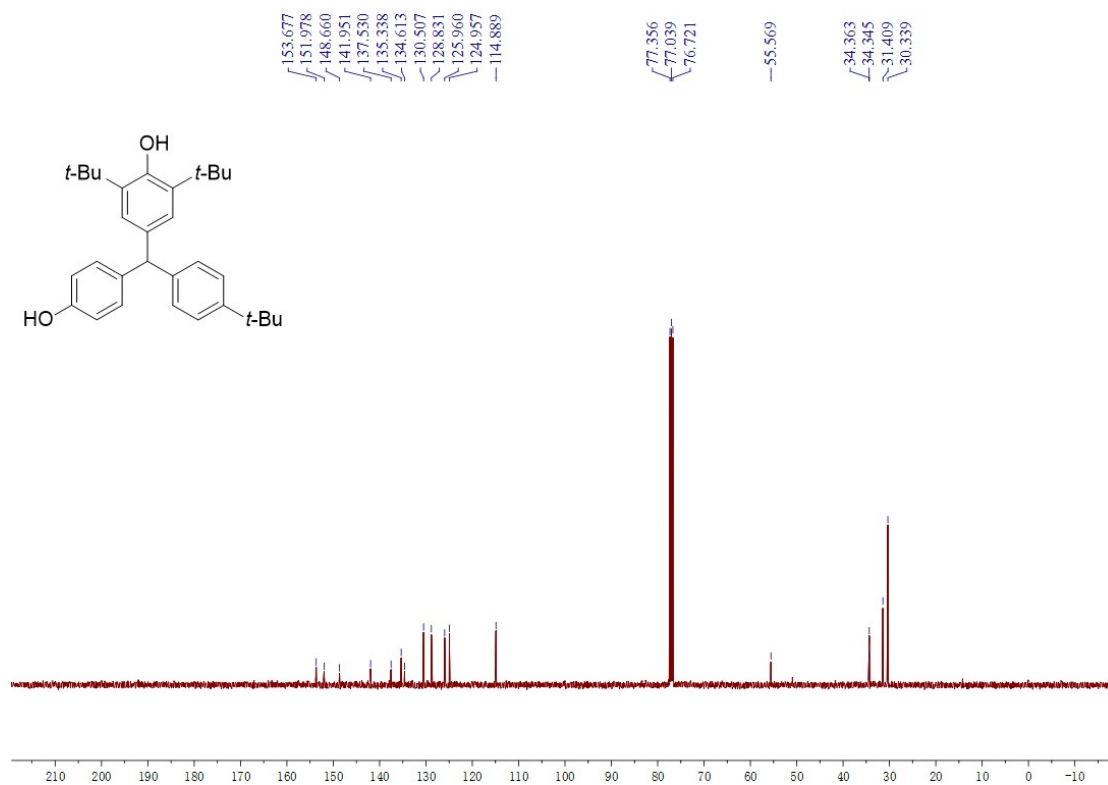

**2,6-Di-tert-butyl-4-((4-hydroxyphenyl)(3-methoxyphenyl)methyl)phenol (7e)**

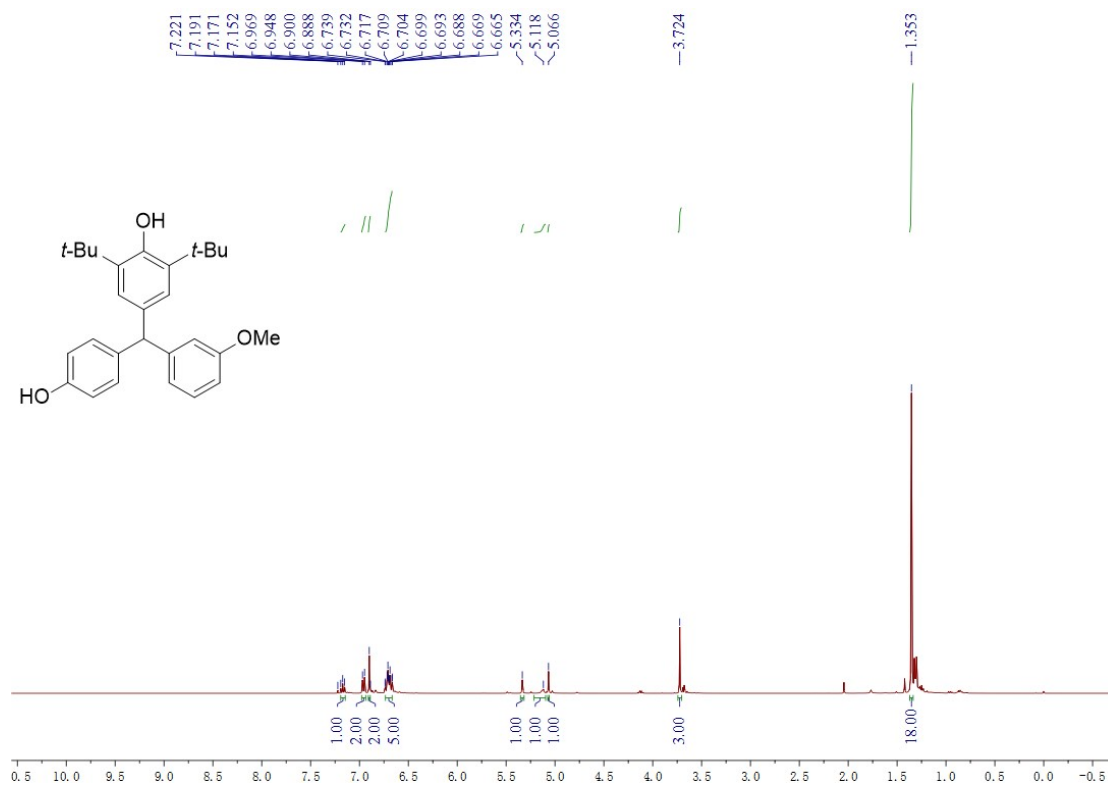

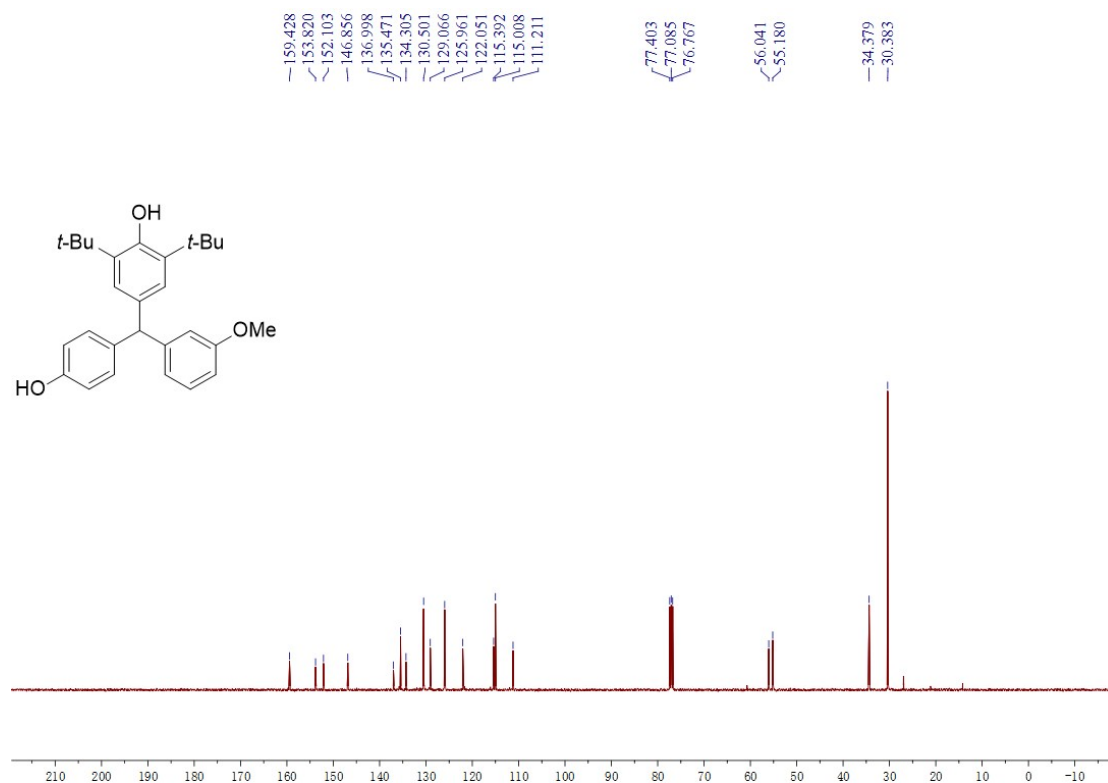

**2,6-Di-tert-butyl-4-((4-hydroxyphenyl)(4-isopropoxyphenyl)methyl)phenol (7f)**

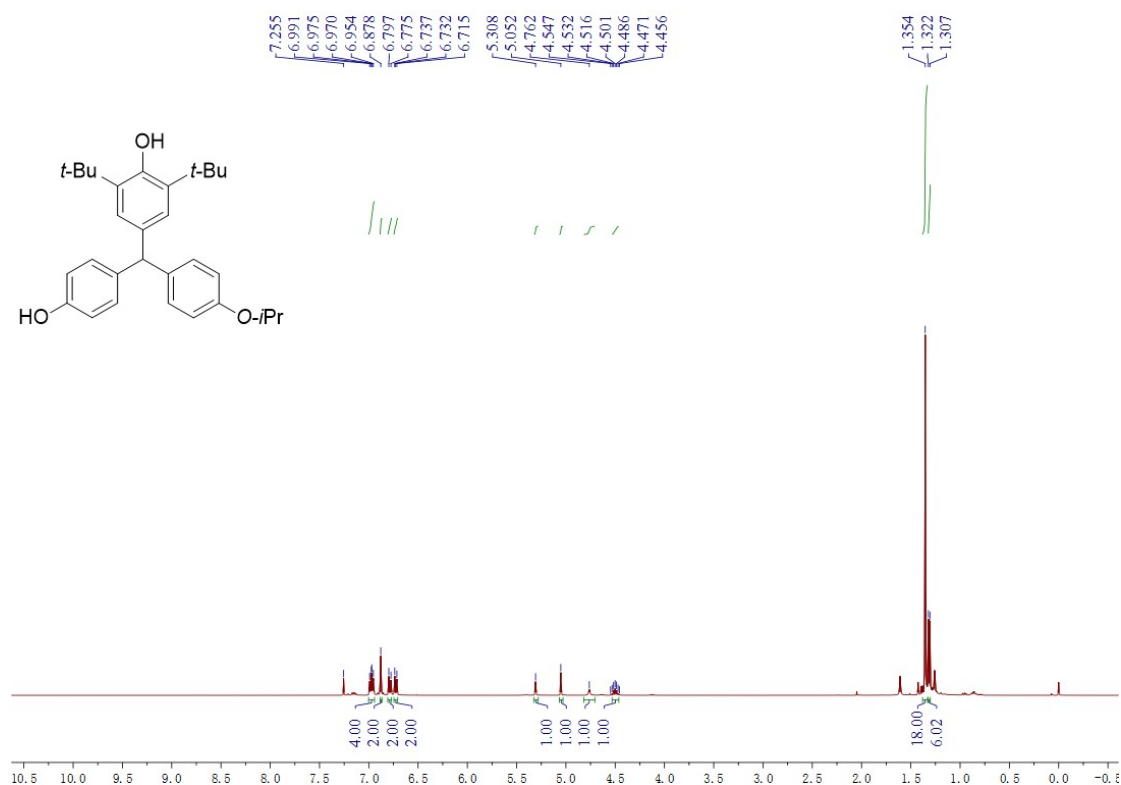

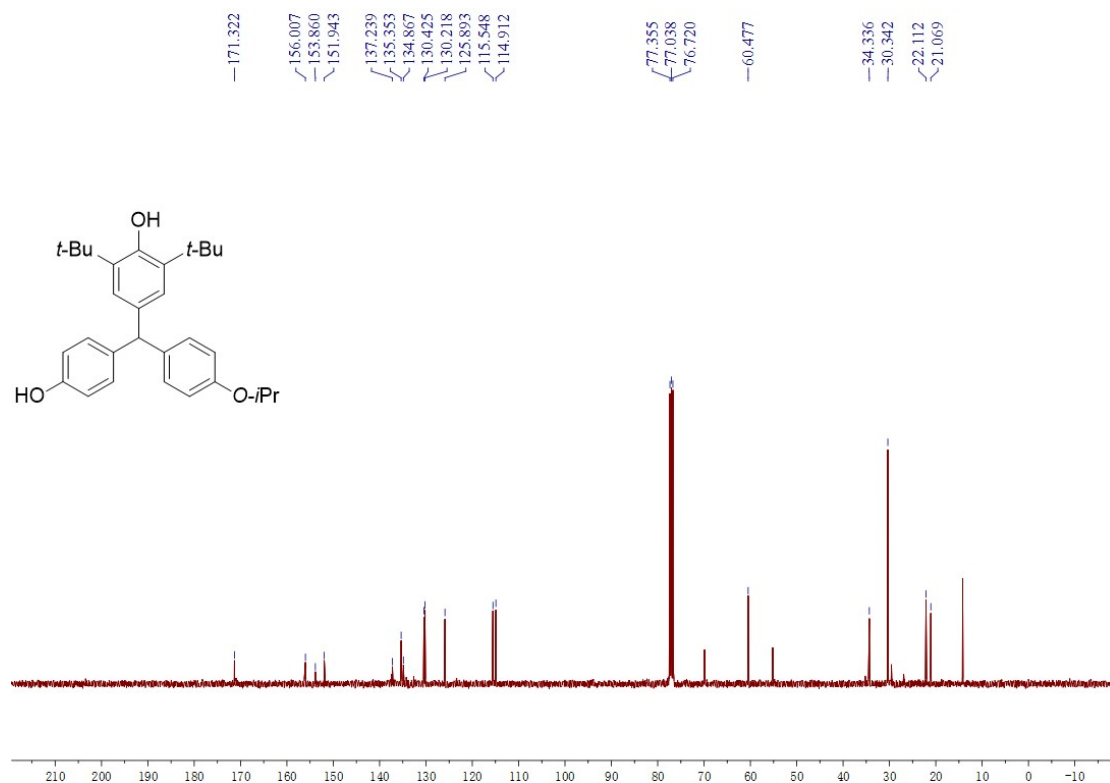

**2,6-Di-tert-butyl-4-((2-hydroxyphenyl)(4-hydroxyphenyl)methyl)phenol (7h)**

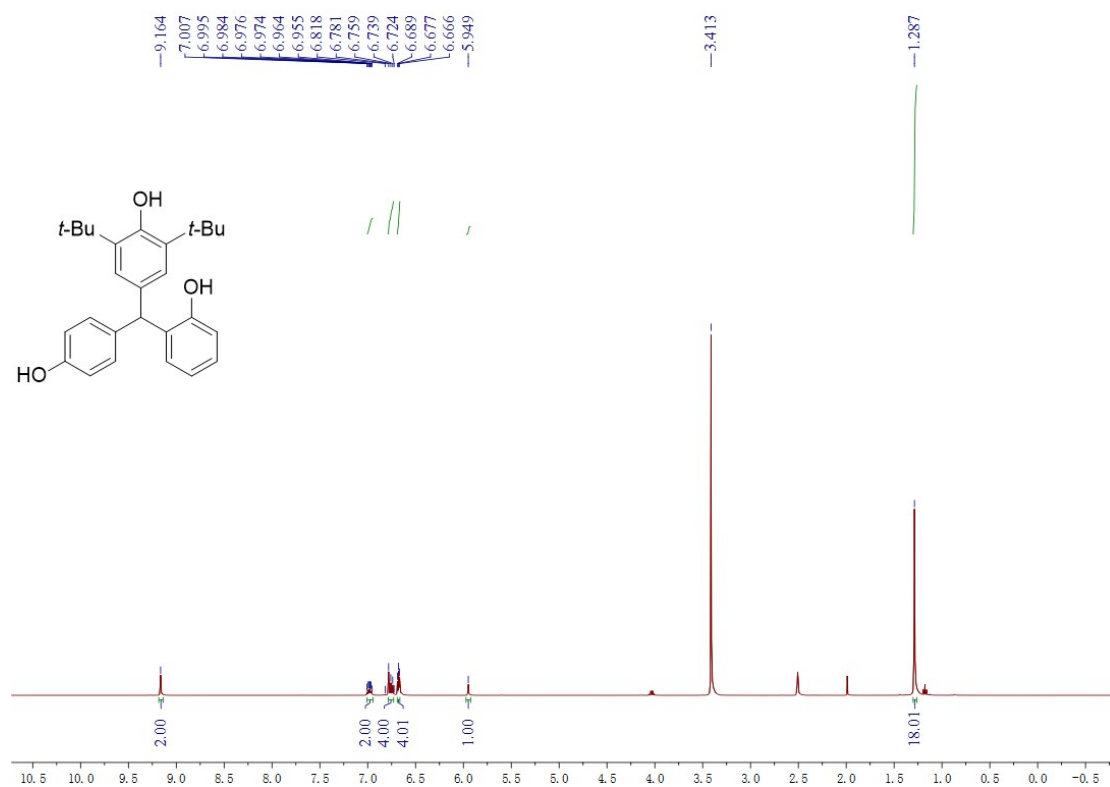

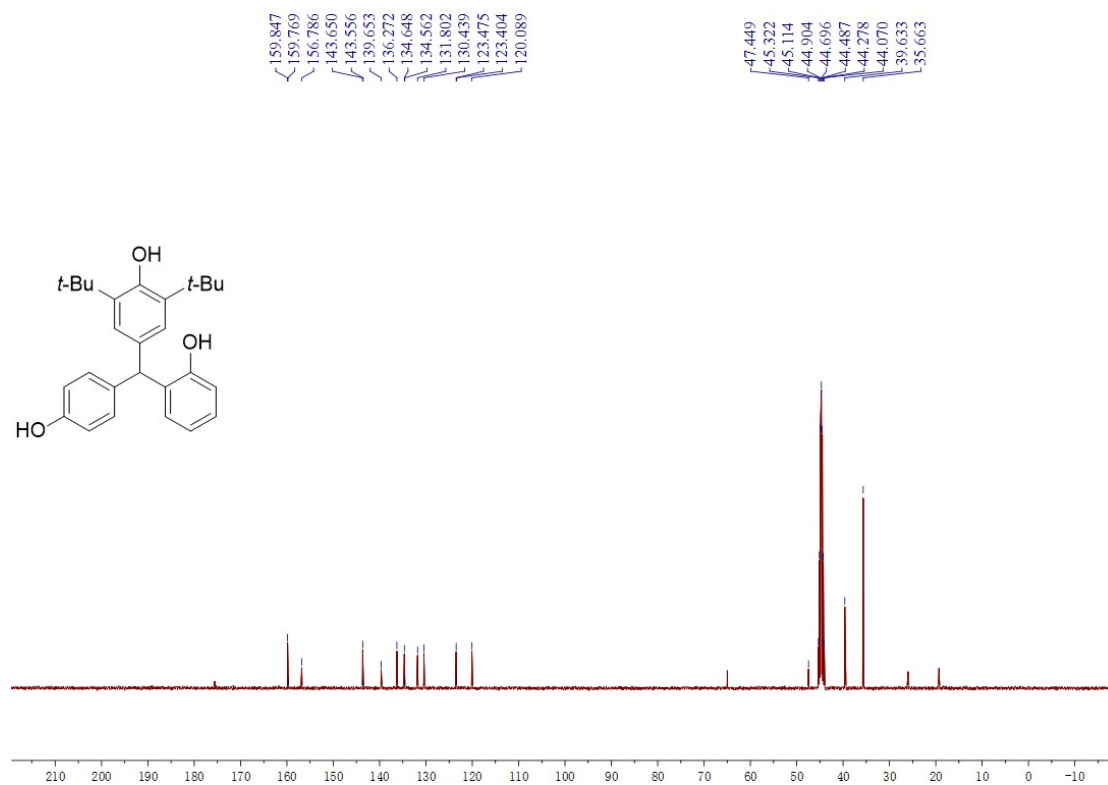

**2,6-Di-tert-butyl-4-((4-hydroxy-3-methoxyphenyl)(4-hydroxyphenyl)methyl)phenol (7i)**

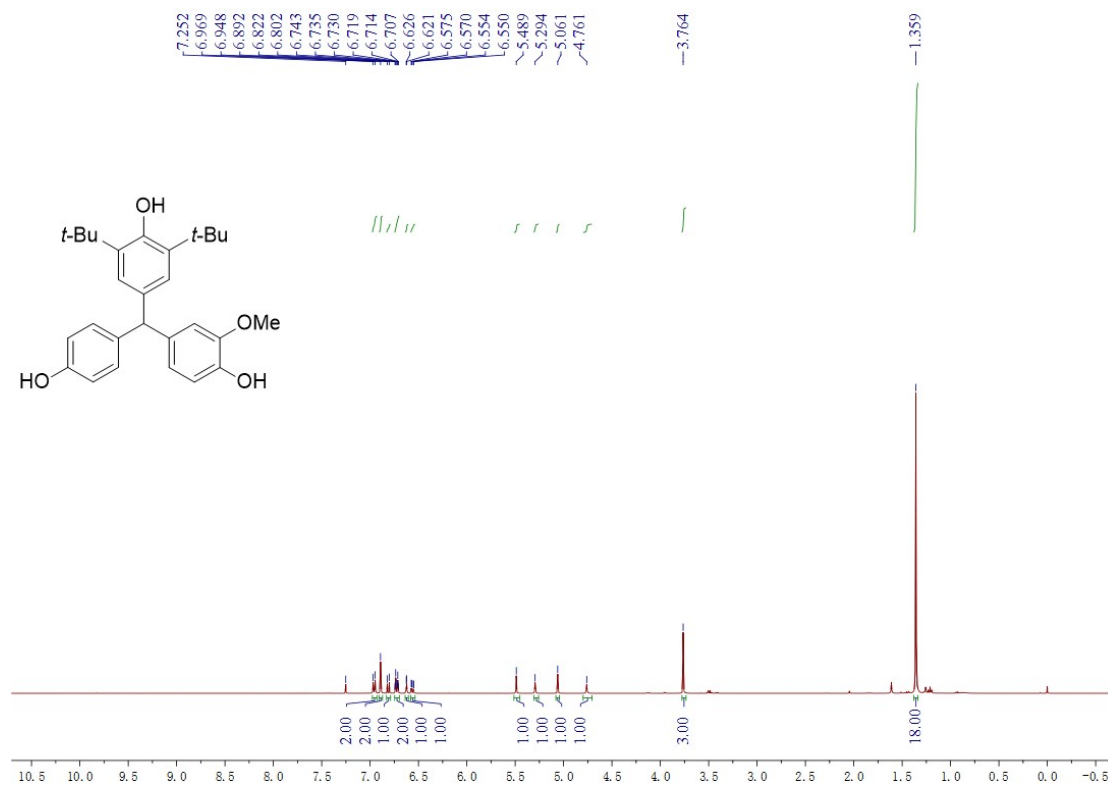

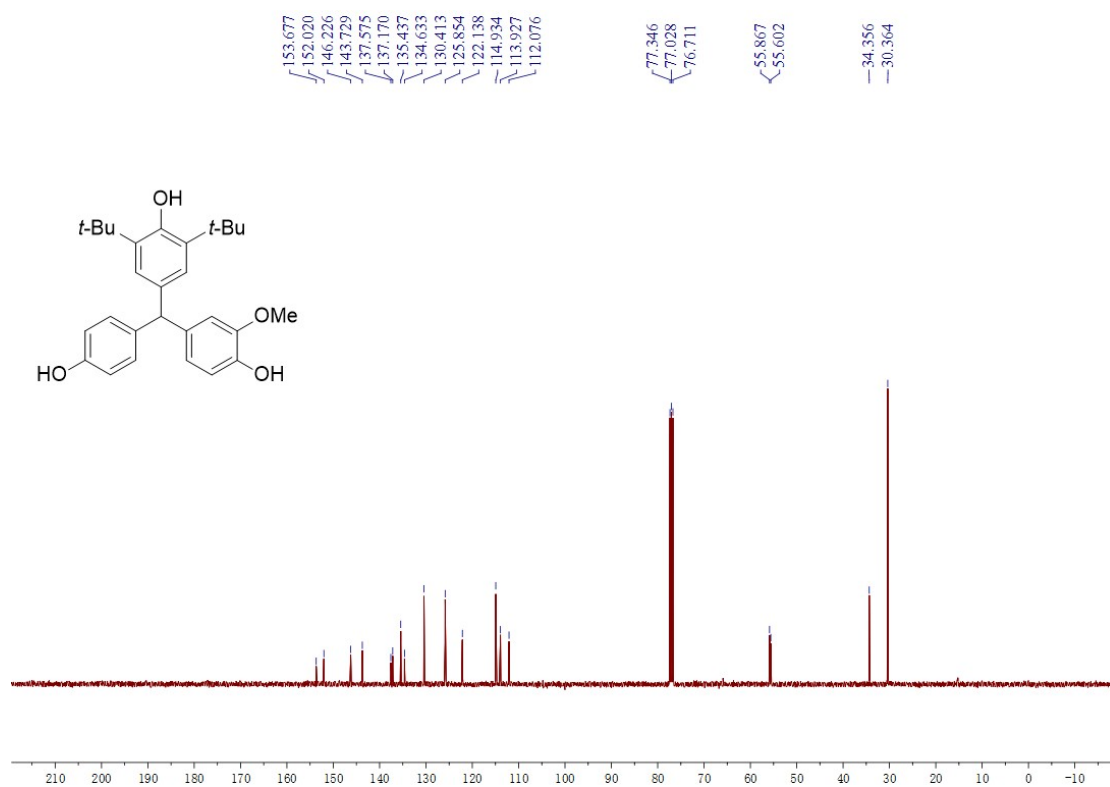

**2,6-Di-tert-butyl-4-((2,5-dimethoxyphenyl)(4-hydroxyphenyl)methyl)phenol (7j)**

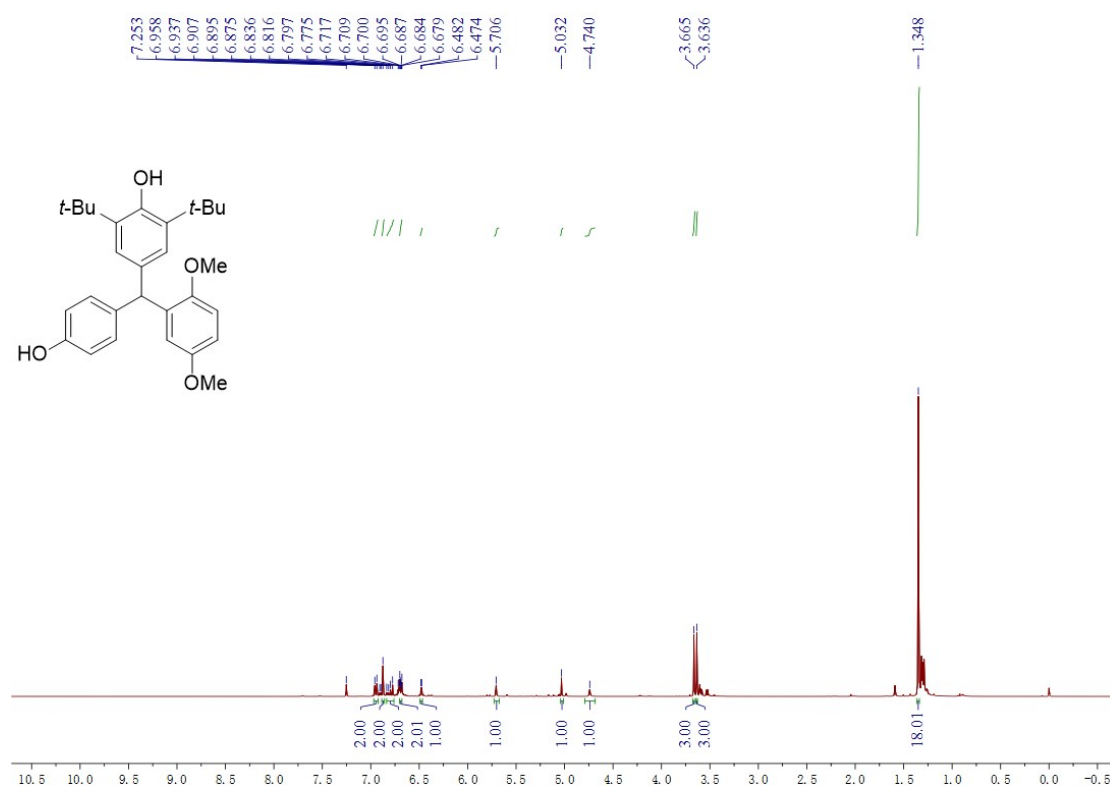

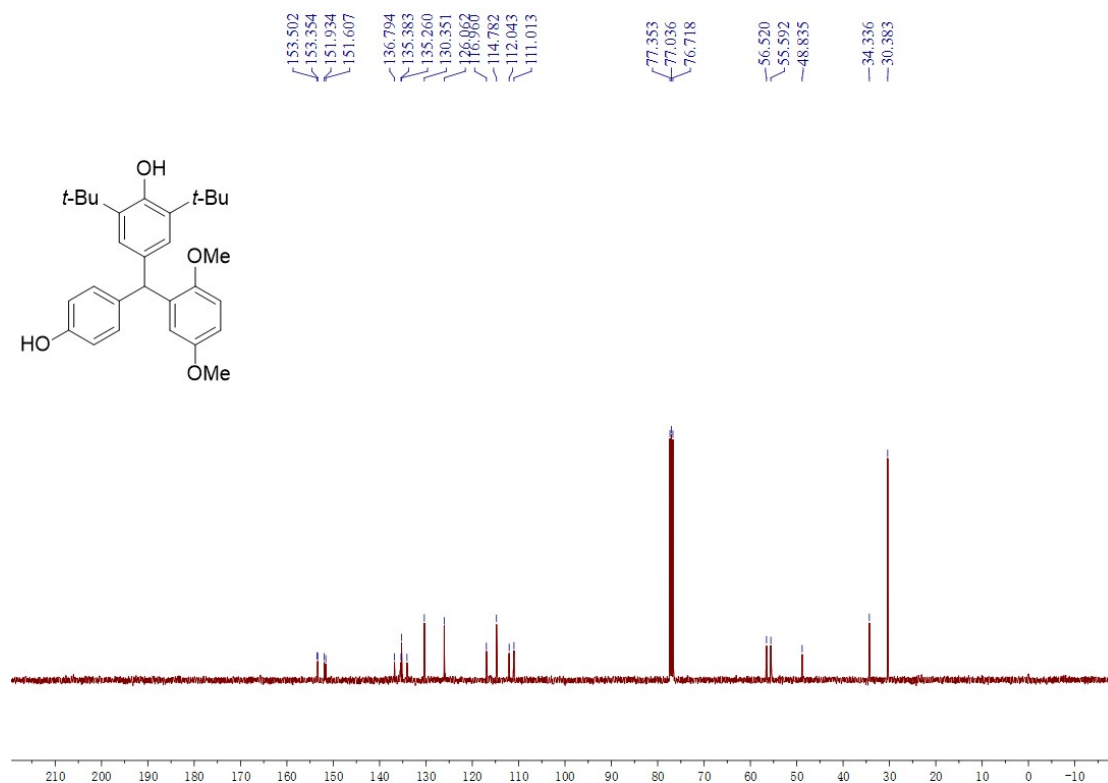

**2,6-Di-tert-butyl-4-((4-hydroxyphenyl)(3-nitrophenyl)methyl)phenol (7k)**

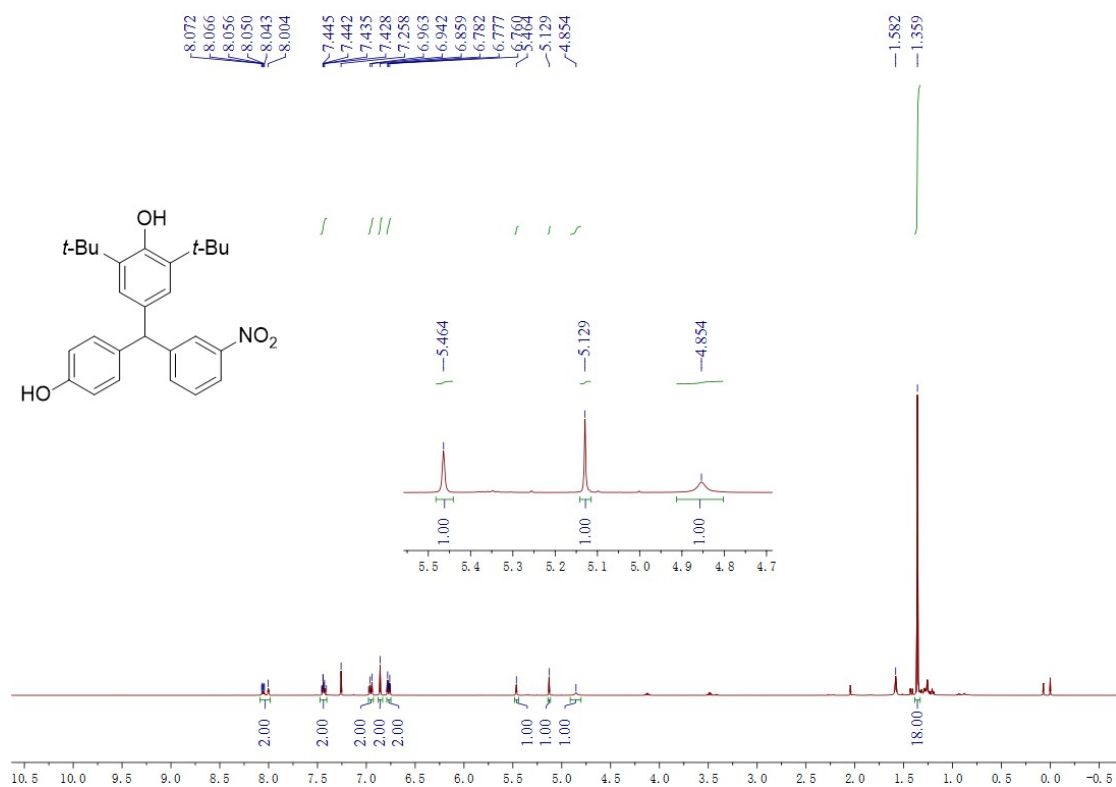

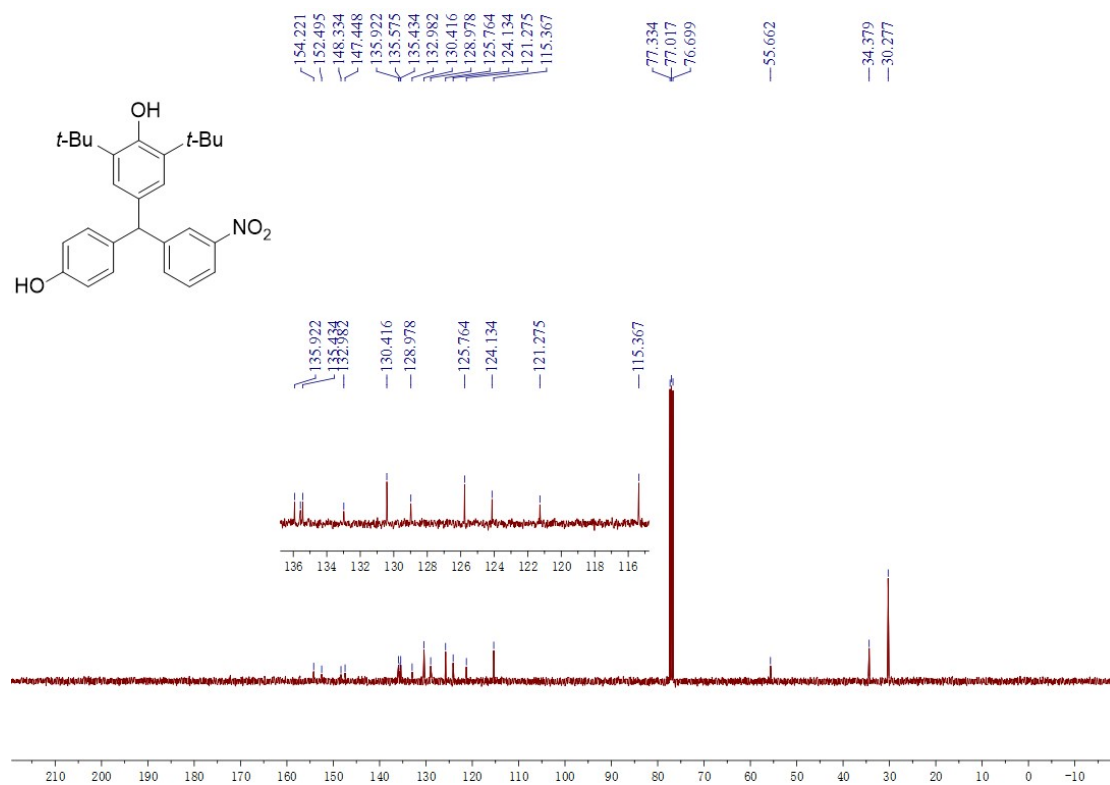

**2,6-Di-tert-butyl-4-((4-hydroxyphenyl)(4-(trifluoromethyl)phenyl)methyl)phenol (7l)**

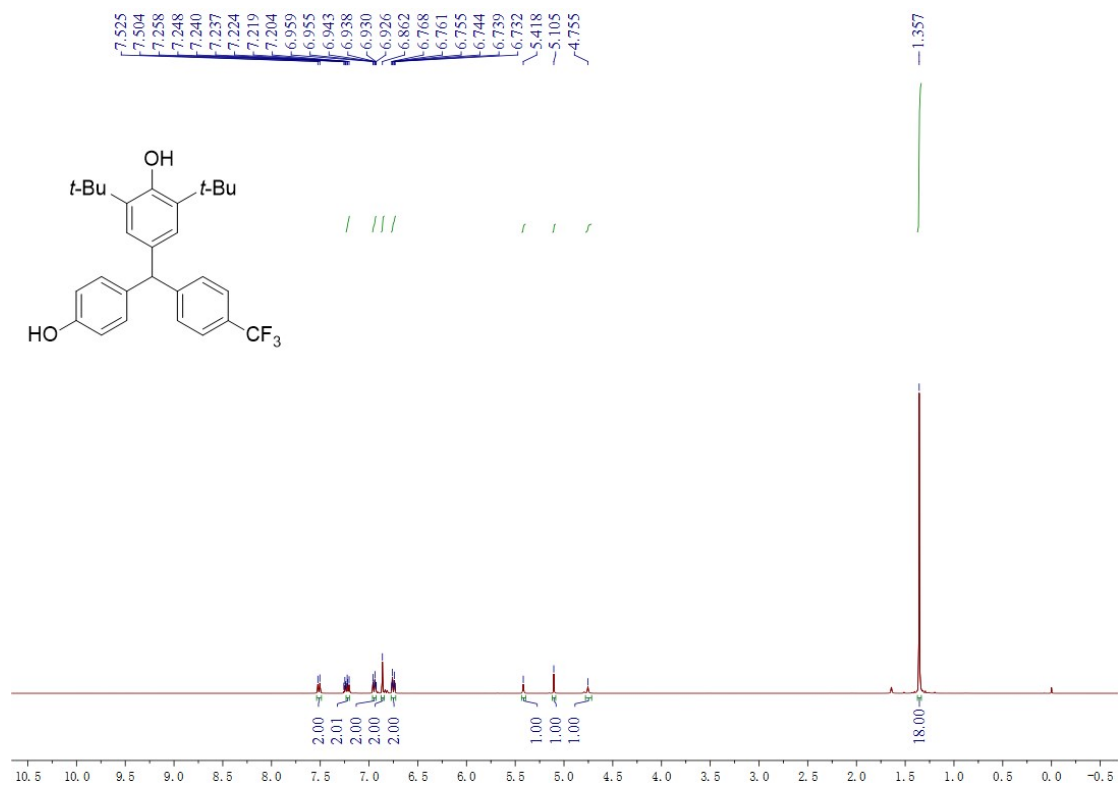

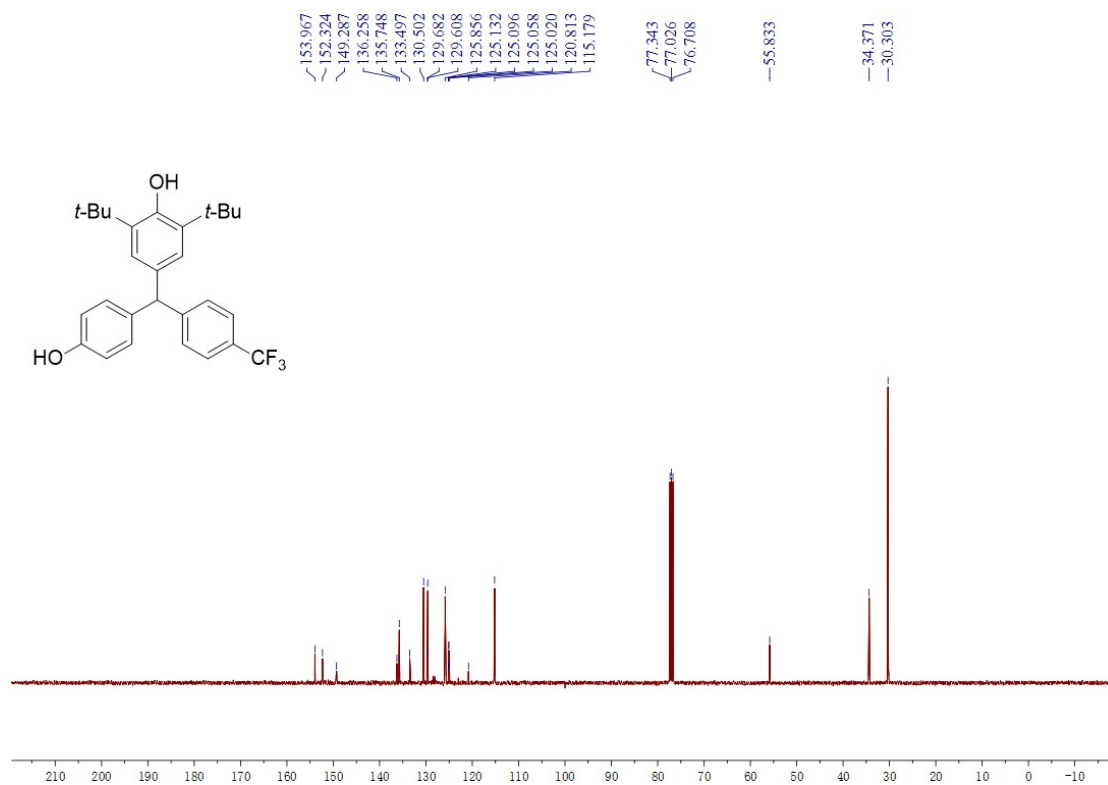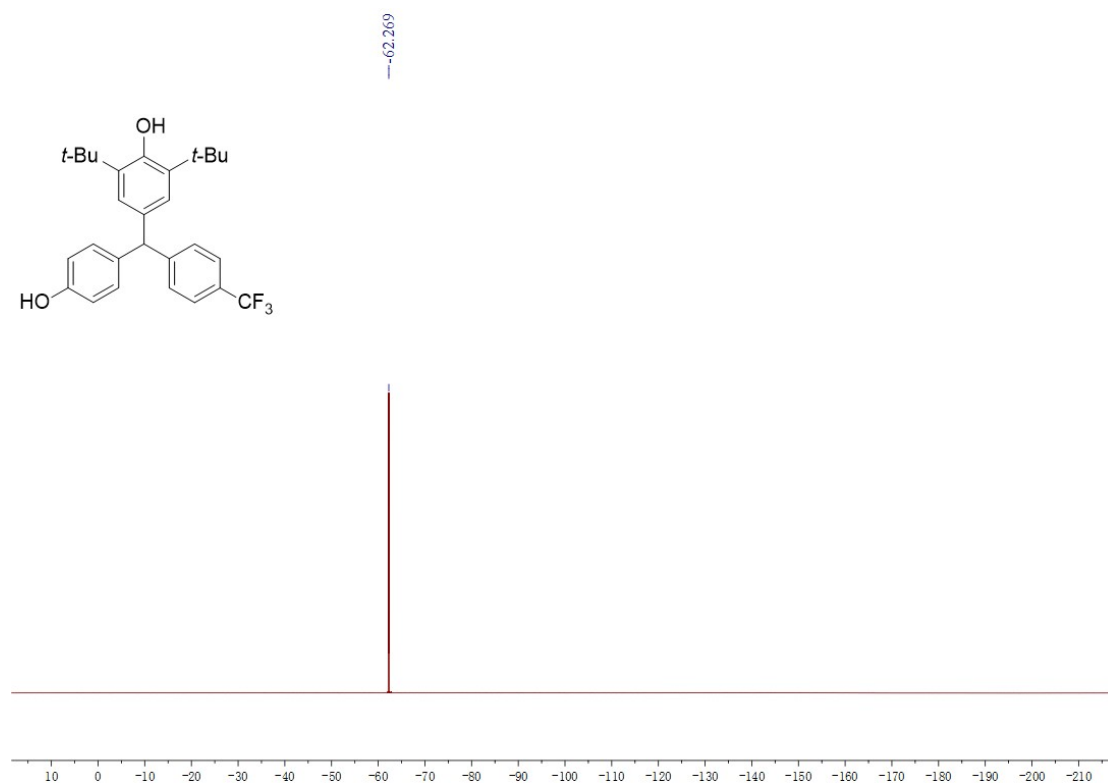

**2,6-Di-tert-butyl-4-((3-fluorophenyl)(4-hydroxyphenyl)methyl)phenol (7m)**



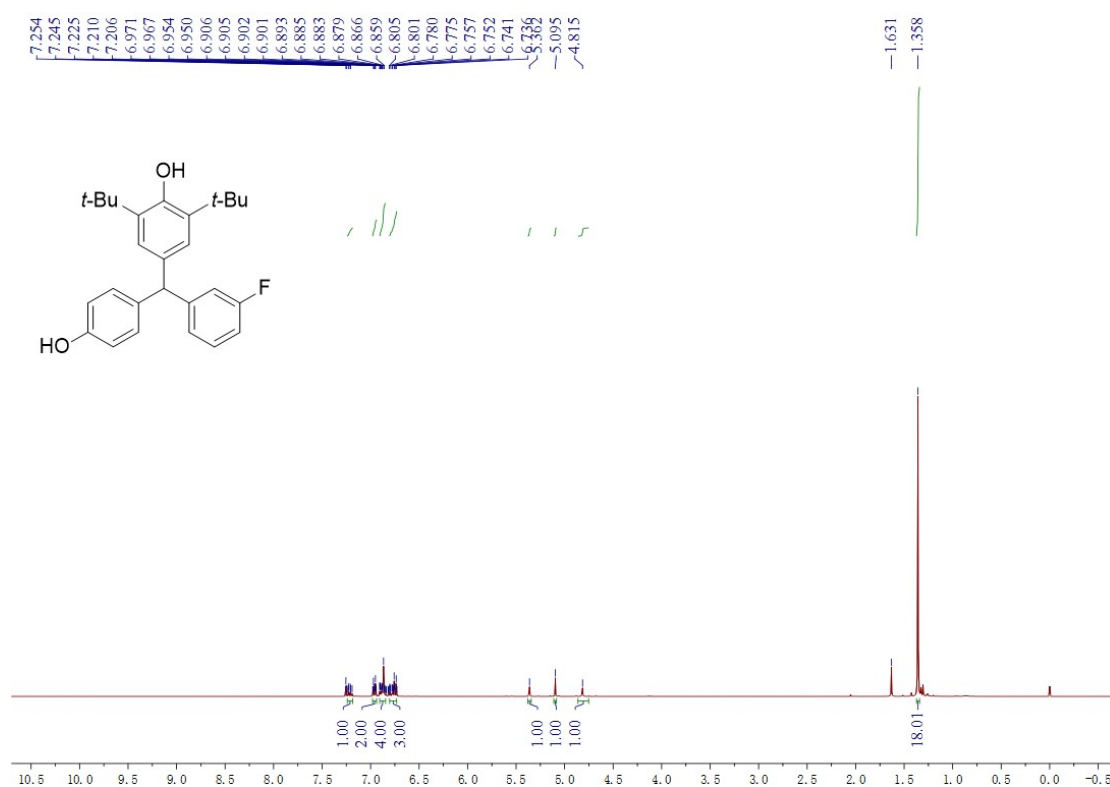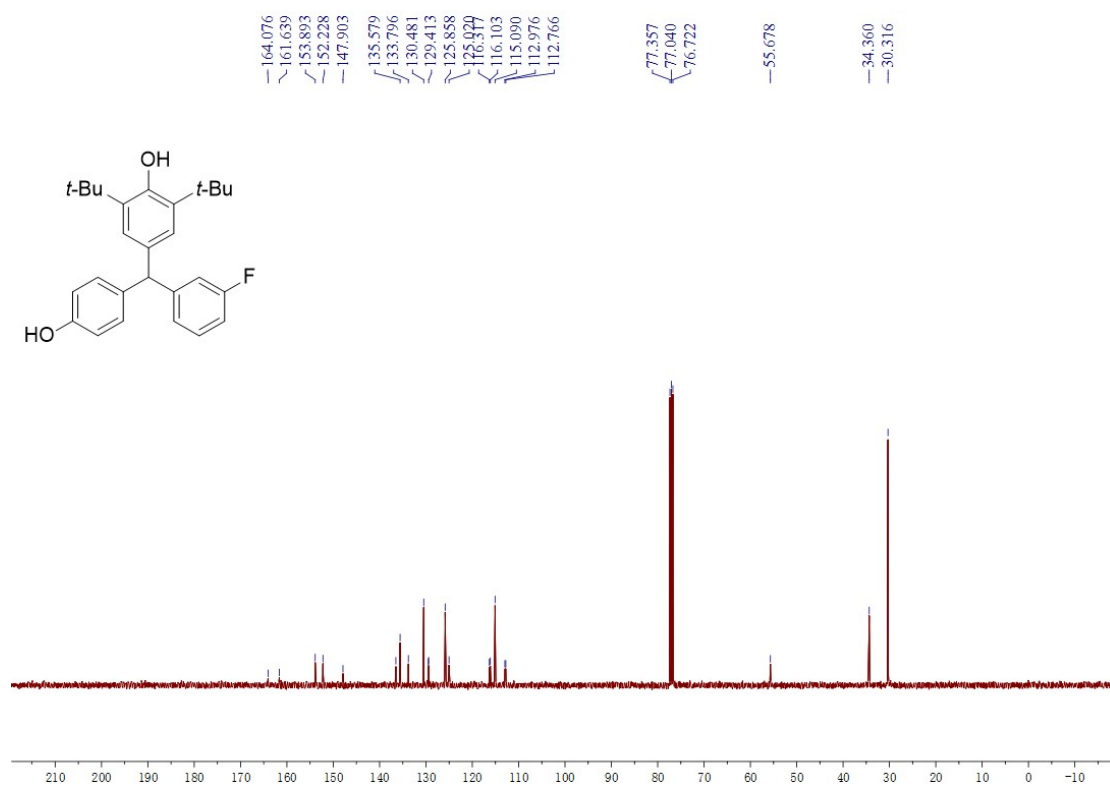

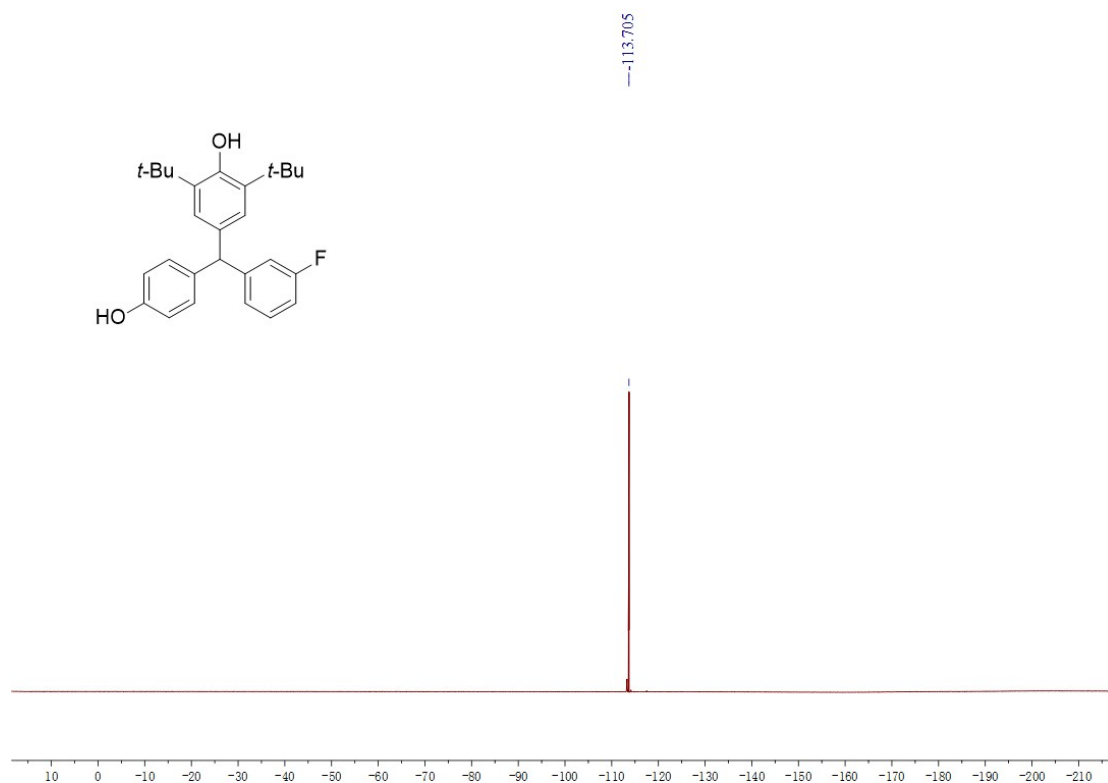

**2,6-Di-tert-butyl-4-((2-fluorophenyl)(4-hydroxyphenyl)methyl)phenol (7n)**

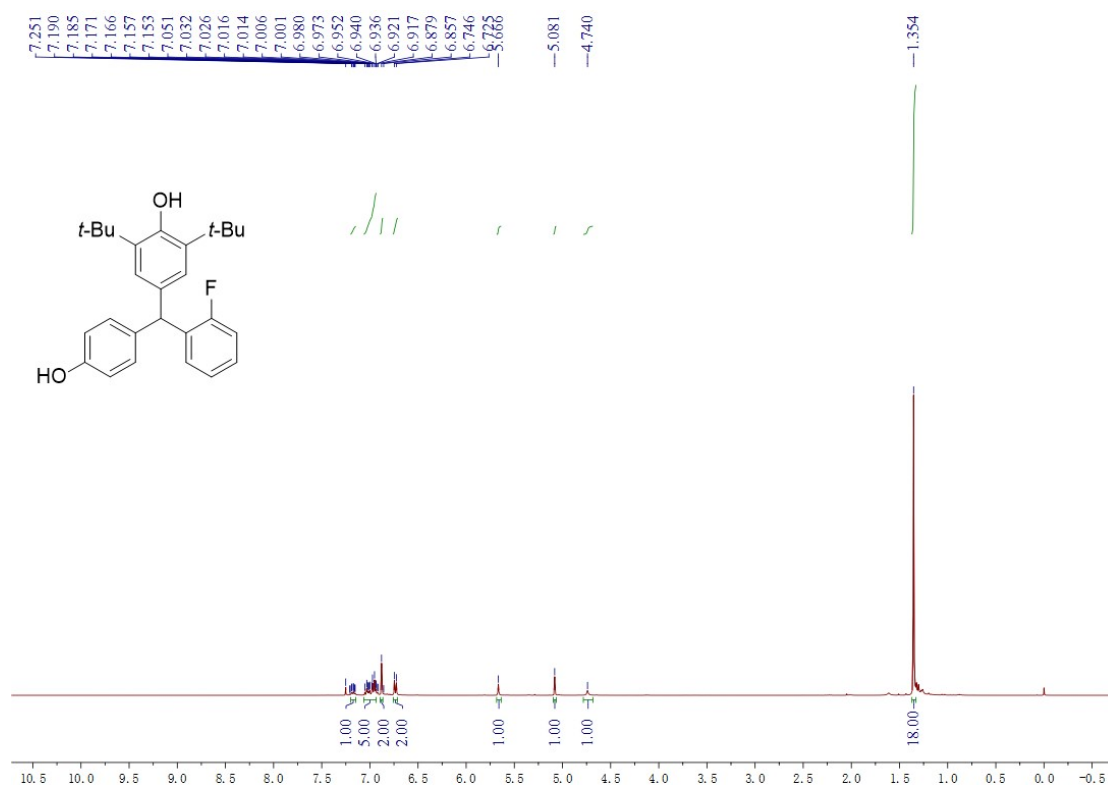

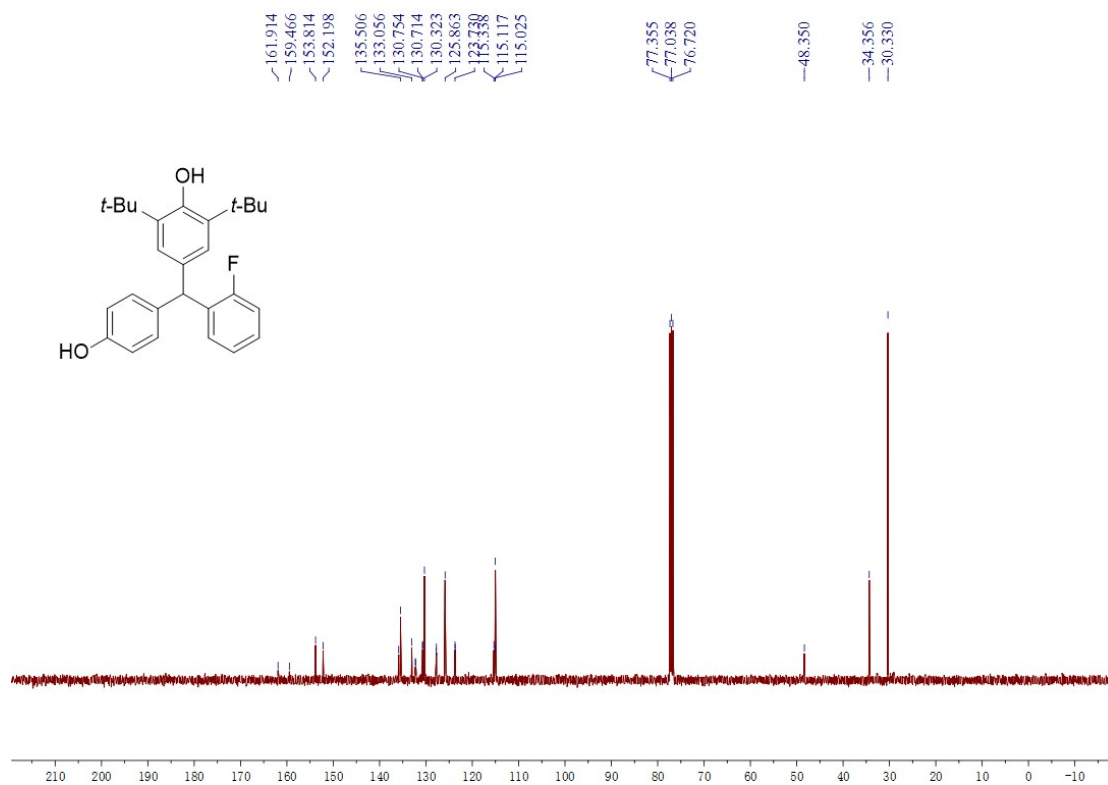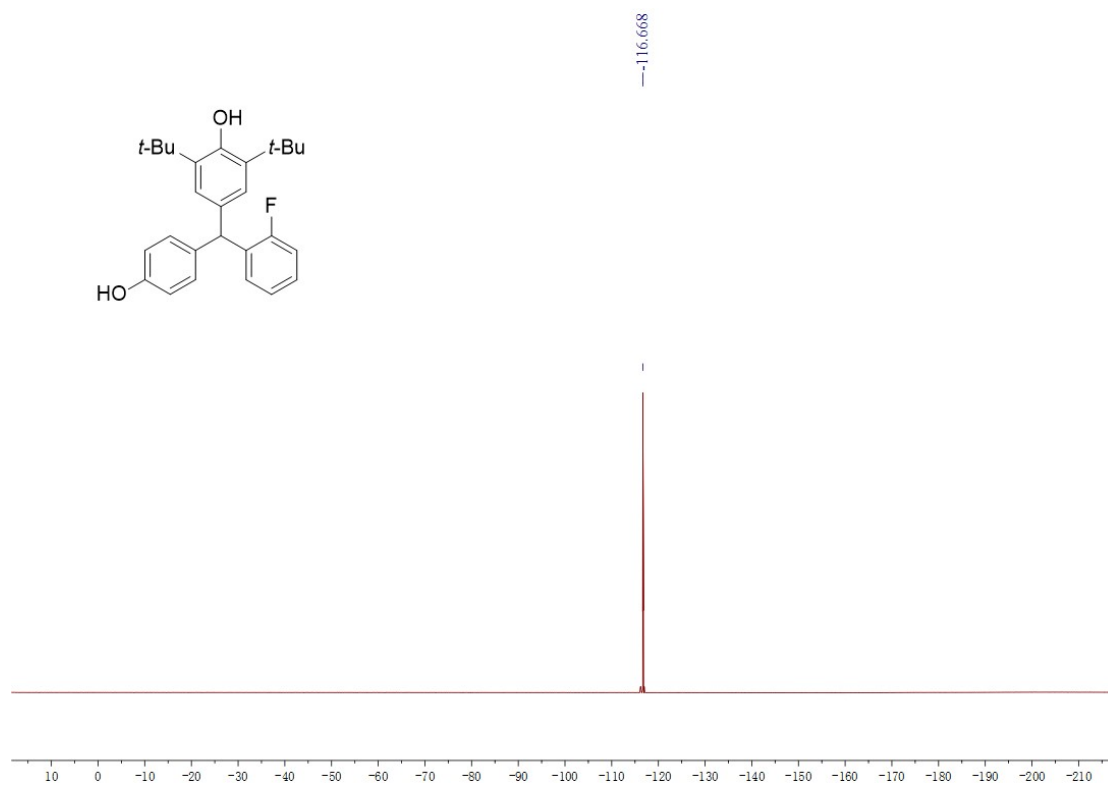

**2,6-Di-*tert*-butyl-4-((4-fluorophenyl)(4-hydroxyphenyl)methyl)phenol (7o)**

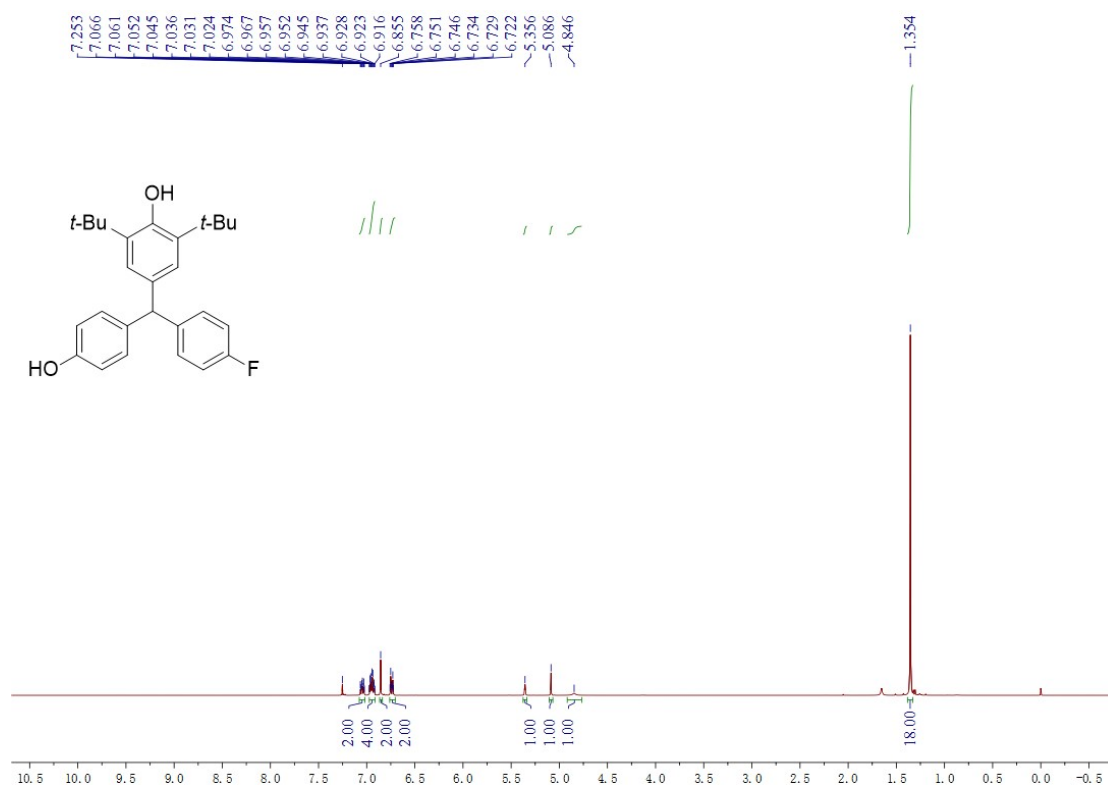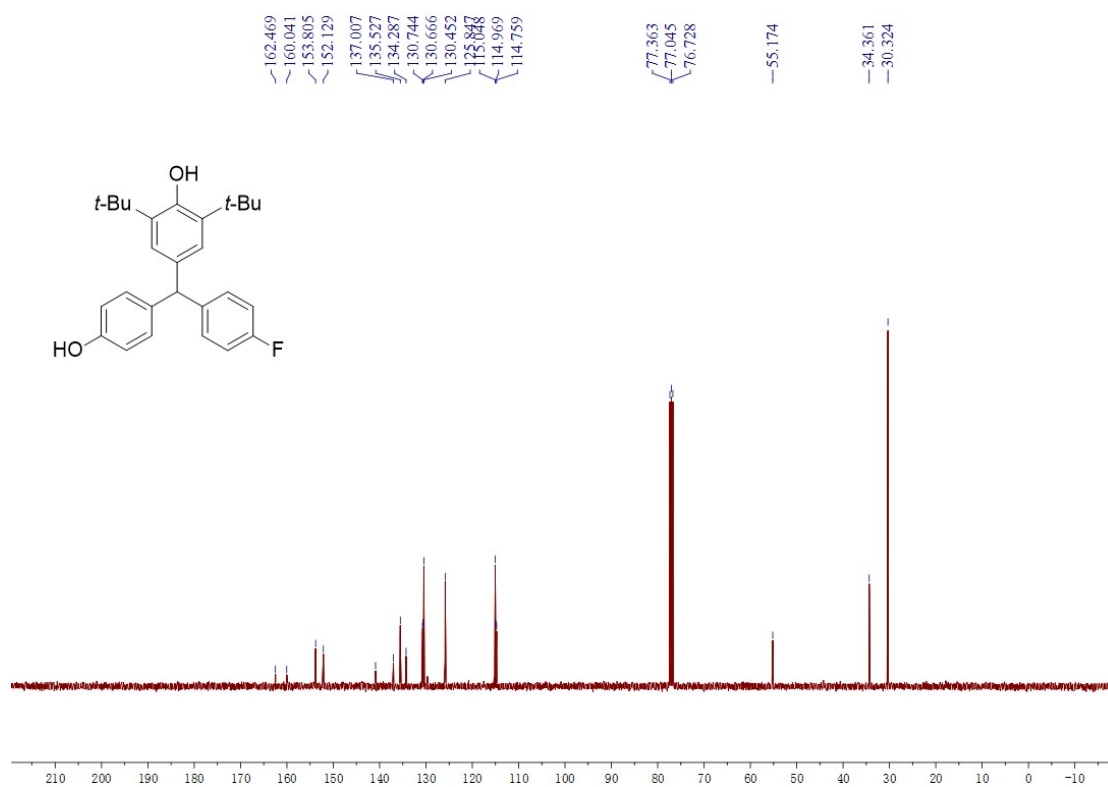

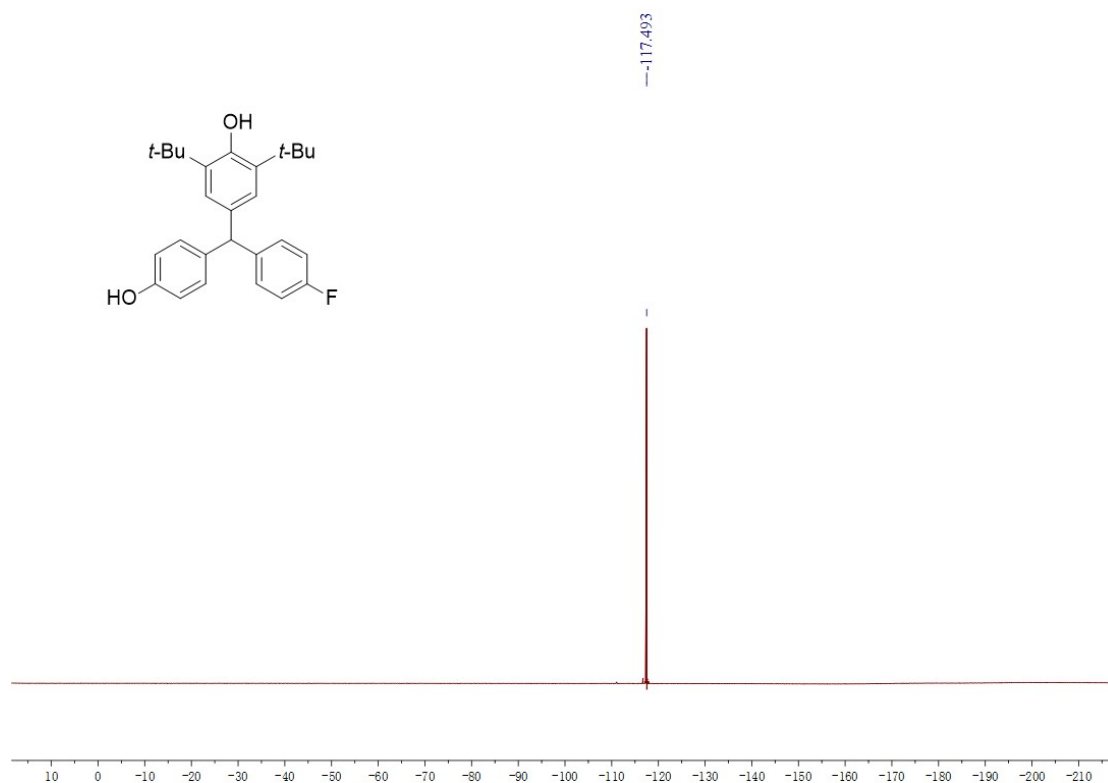

**4-((3-Bromophenyl)(4-hydroxyphenyl)methyl)-2,6-di-tert-butylphenol (7p)**

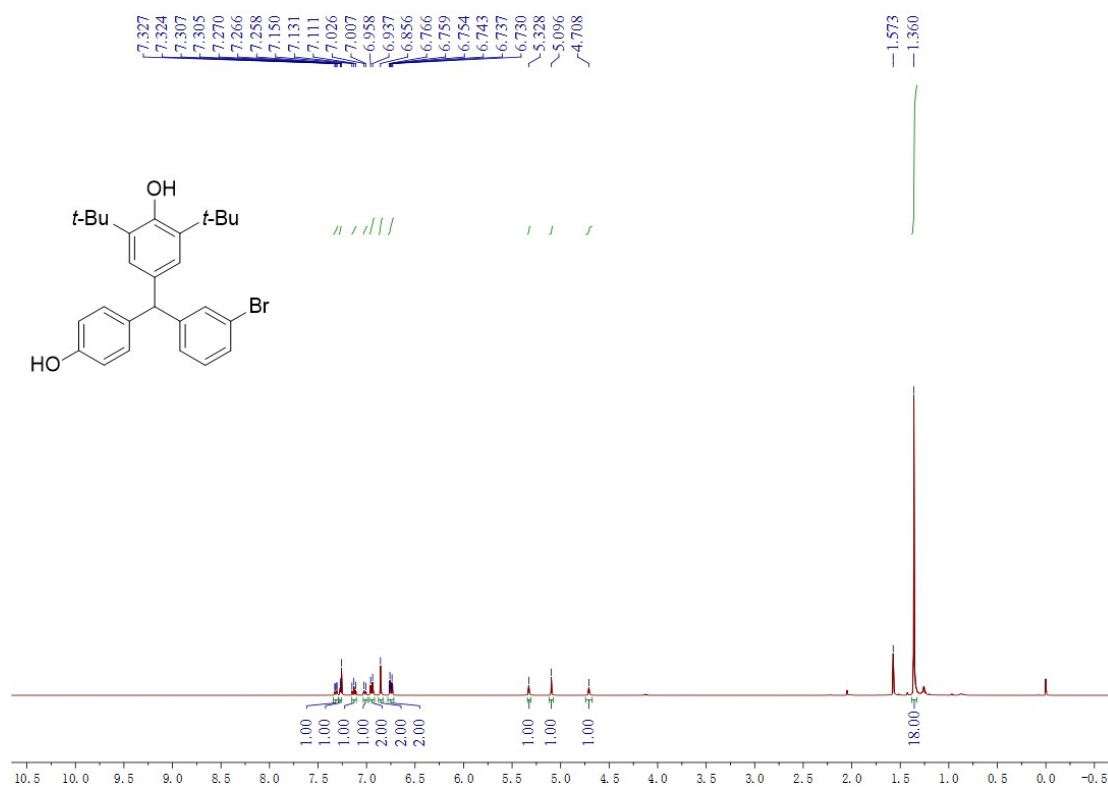

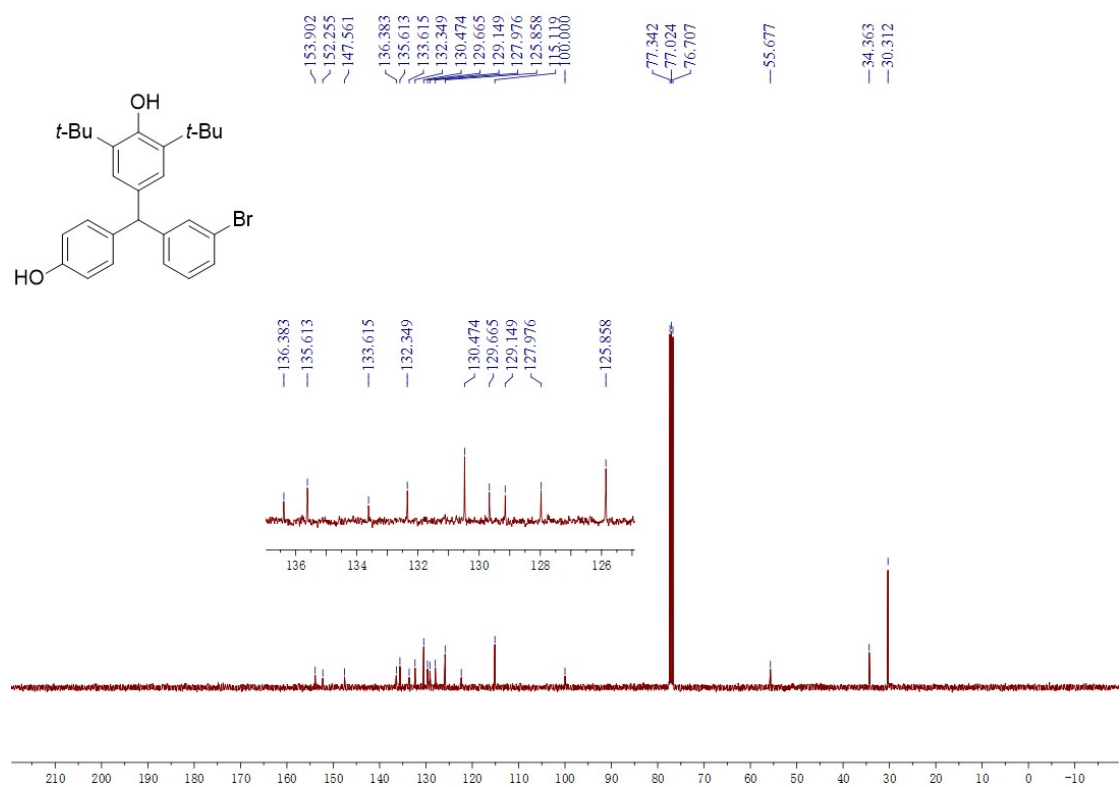

**4-((2-Bromophenyl)(4-hydroxyphenyl)methyl)-2,6-di-tert-butylphenol (7q)**

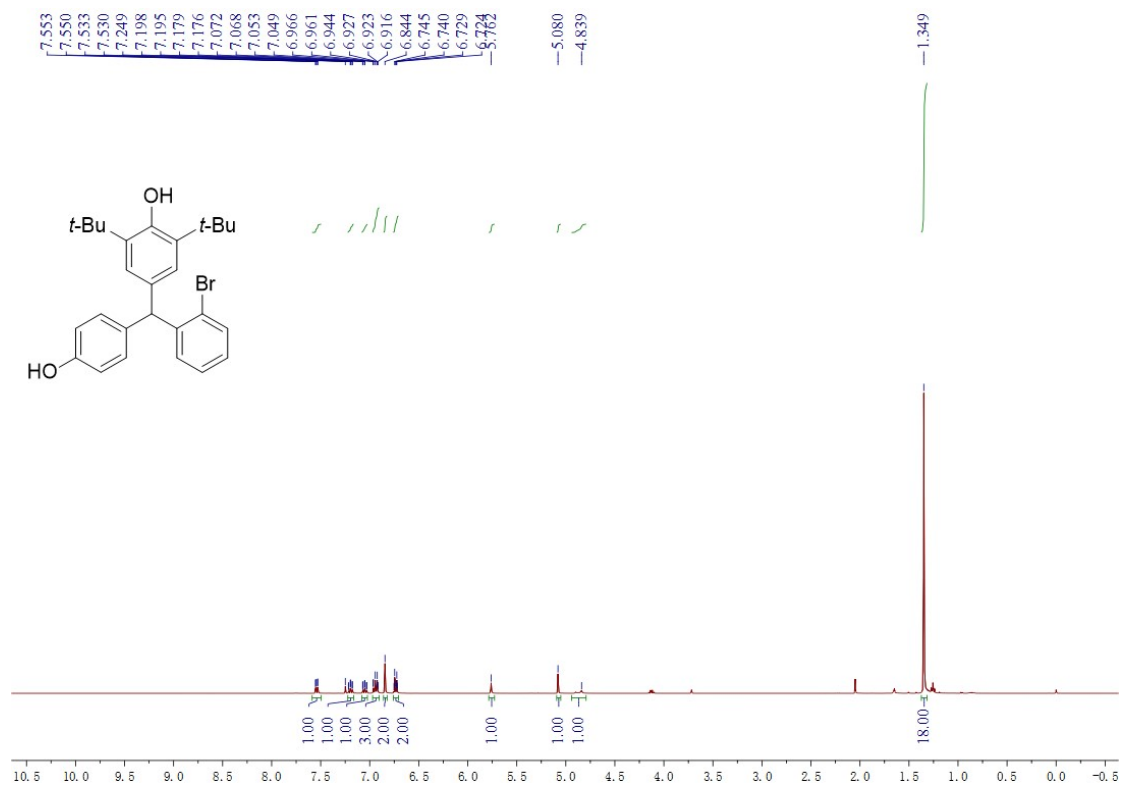

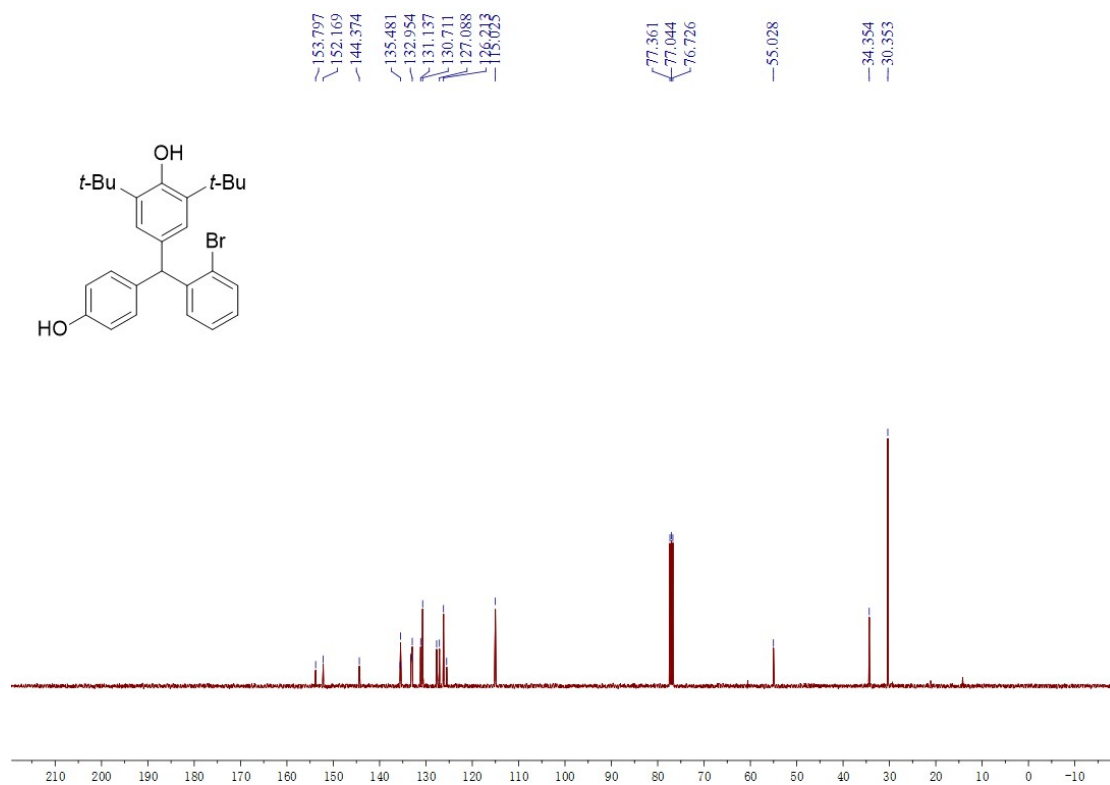

**4-((4-Bromophenyl)(4-hydroxyphenyl)methyl)-2,6-di-tert-butylphenol (7r)**

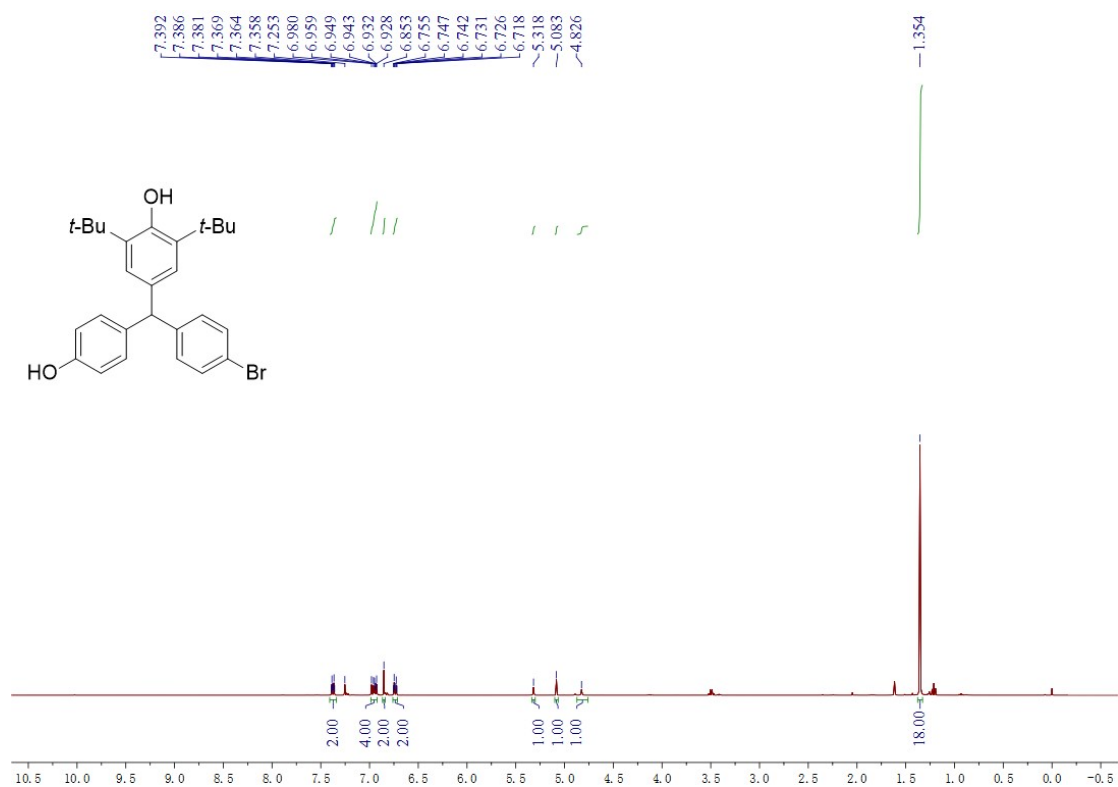

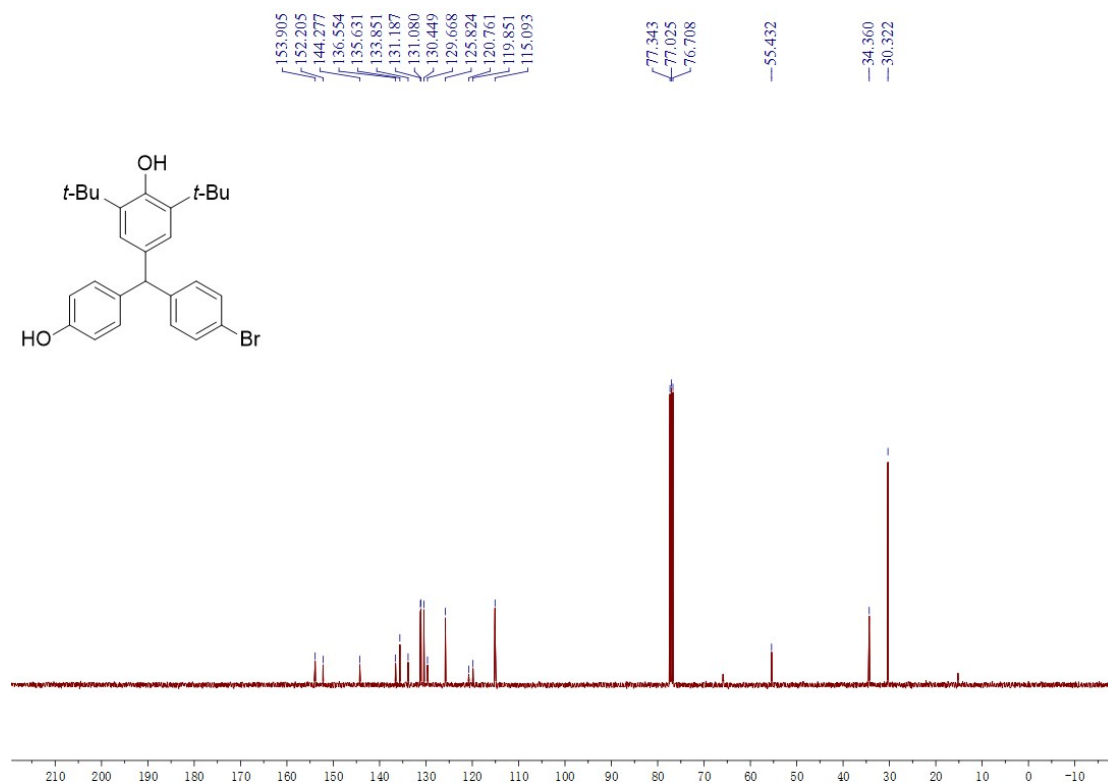

**4-((3,5-Di-tert-butyl-4-hydroxyphenyl)(4-hydroxyphenyl)methyl)benzonitrile (7s)**

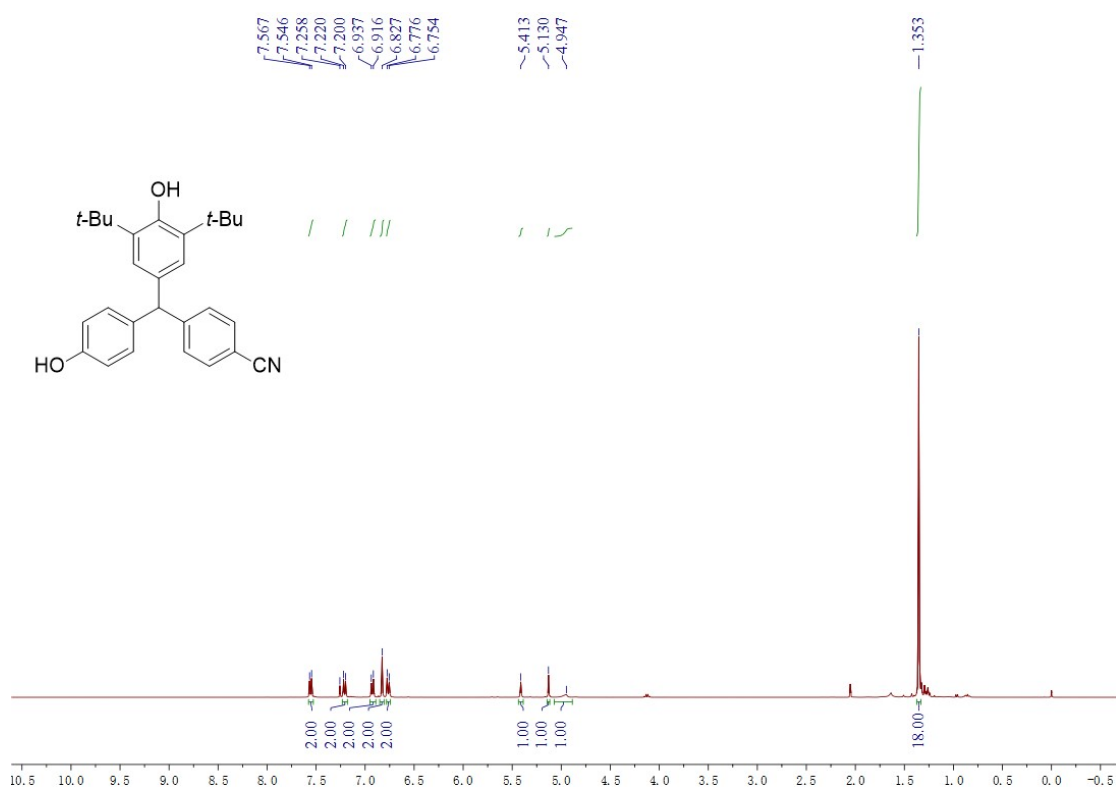



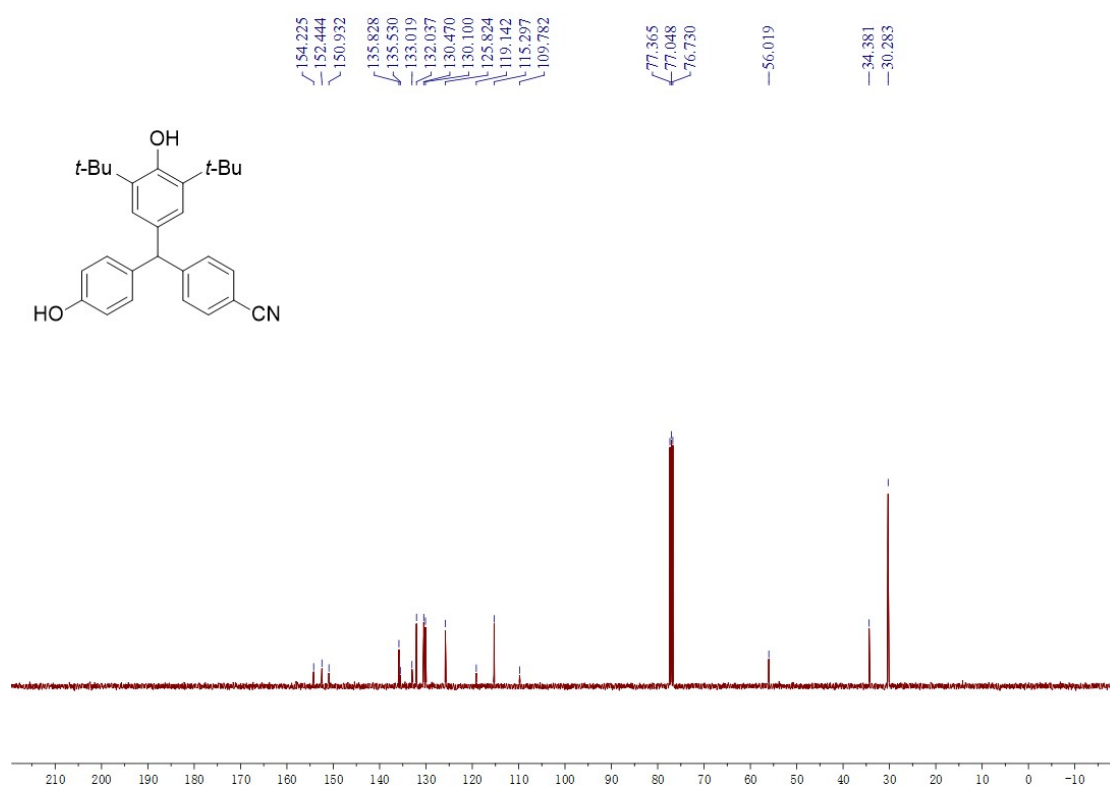

**3-((3,5-Di-*tert*-butyl-4-hydroxyphenyl)(4-hydroxyphenyl)methyl)benzonitrile (7t)**

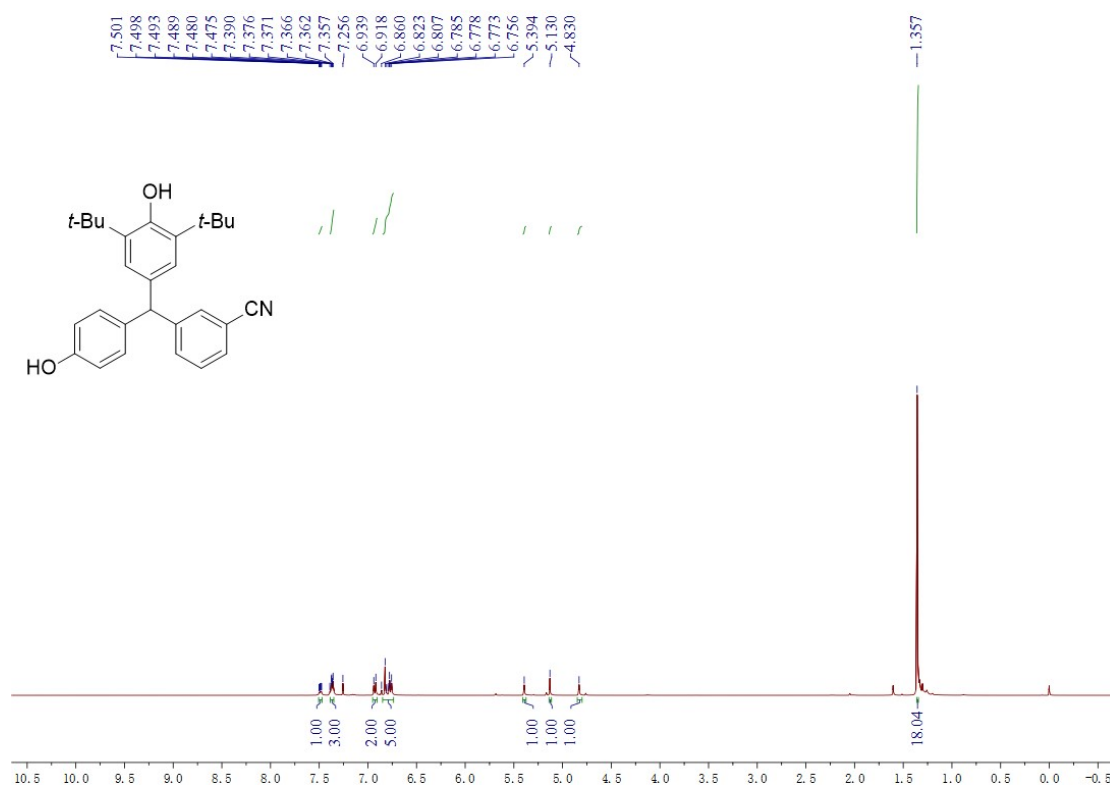

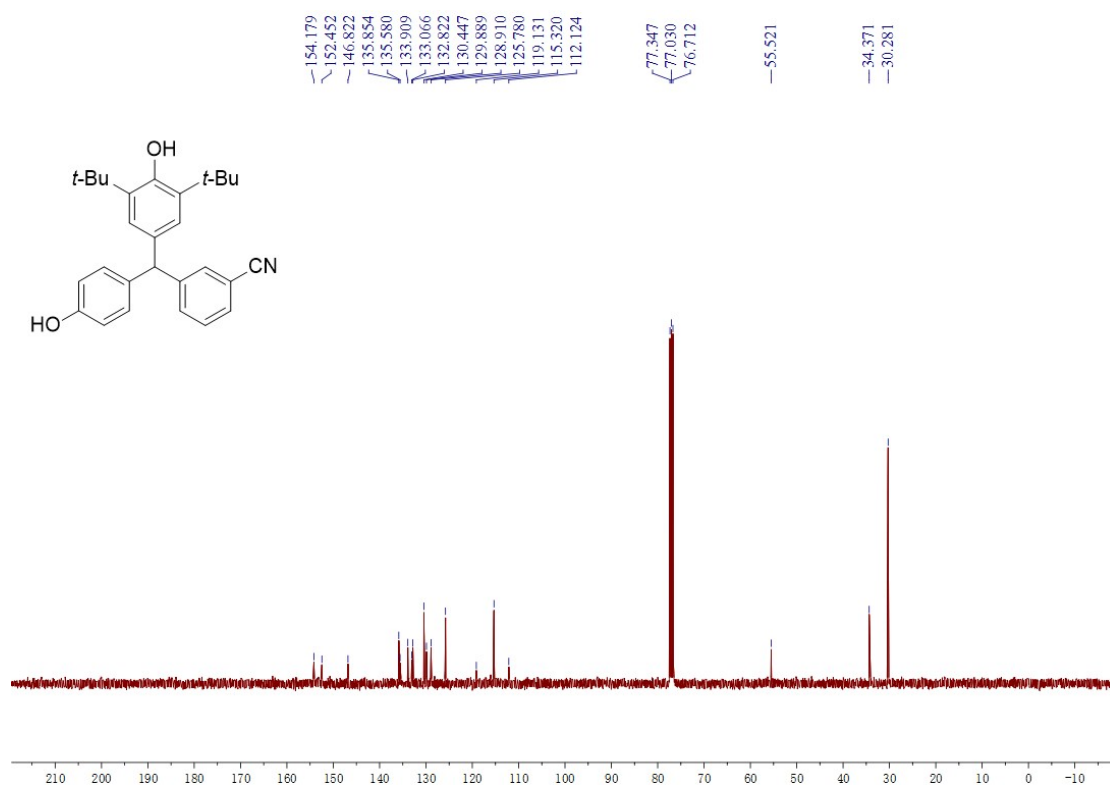

**2,6-Di-tert-butyl-4-((4-hydroxyphenyl)(thiophen-3-yl)methyl)phenol (7u)**

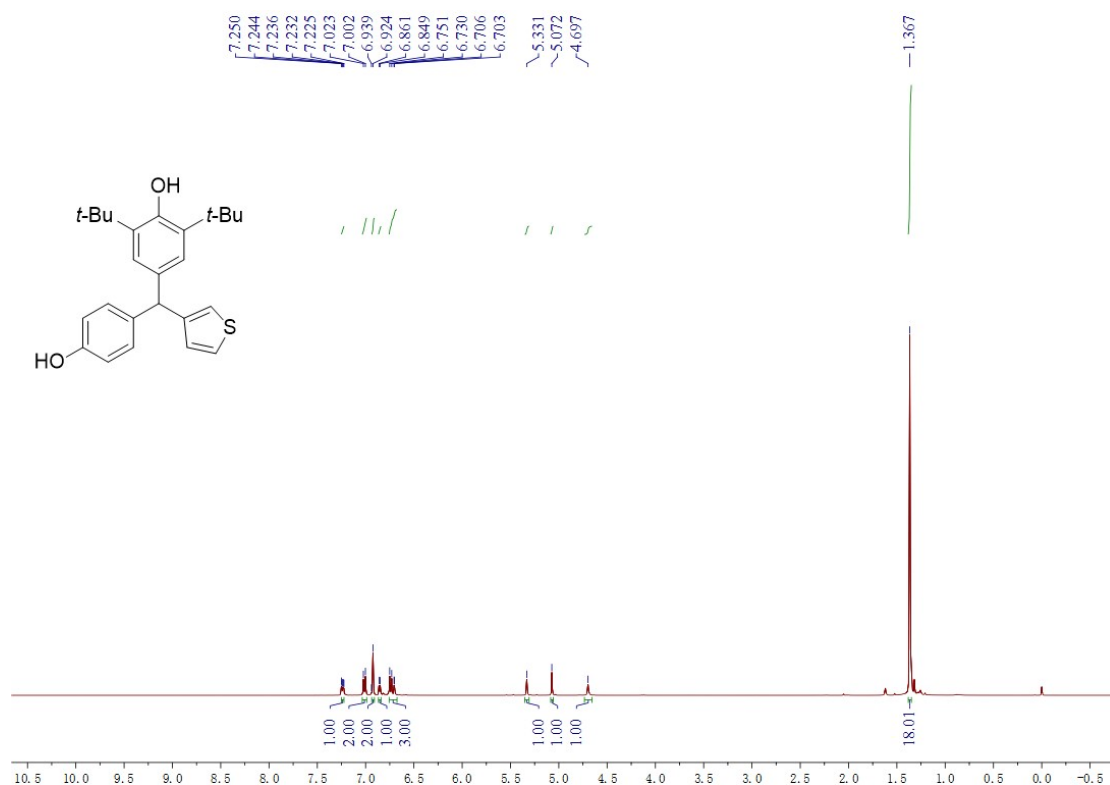

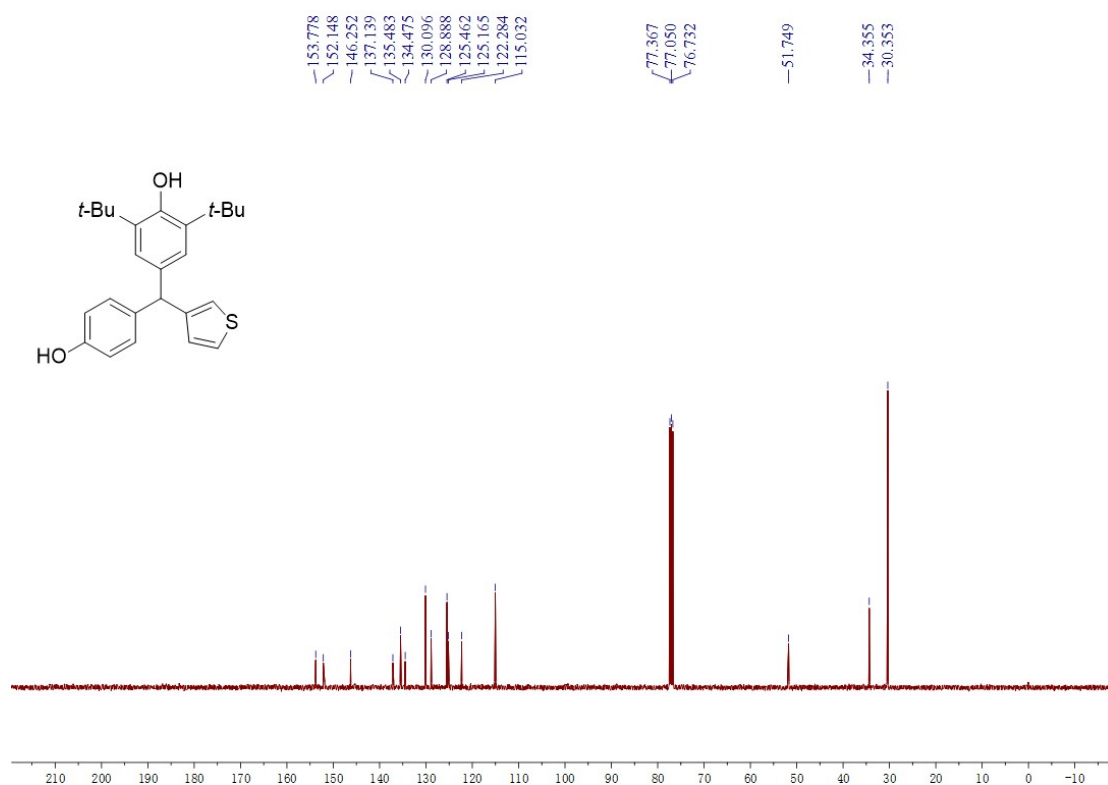

**2,6-Di-tert-butyl-4-((2,3-dihydrobenzofuran-6-yl)(4-hydroxyphenyl)methyl)phenol (7x)**

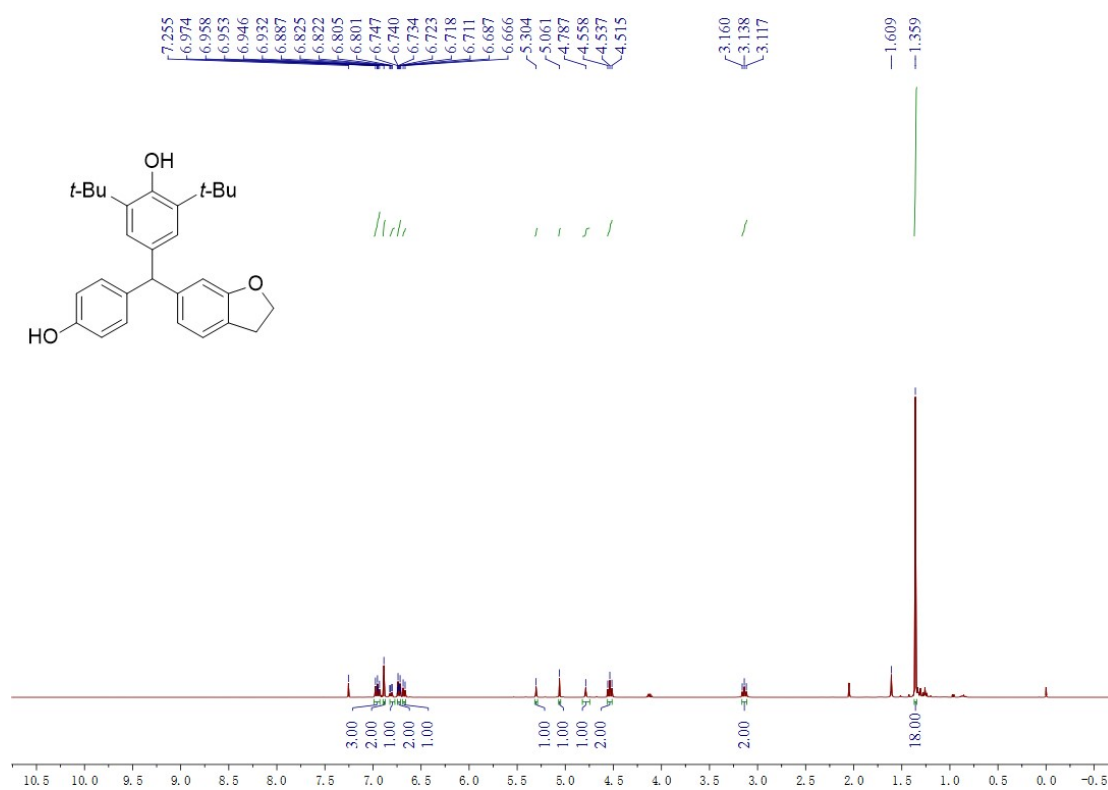

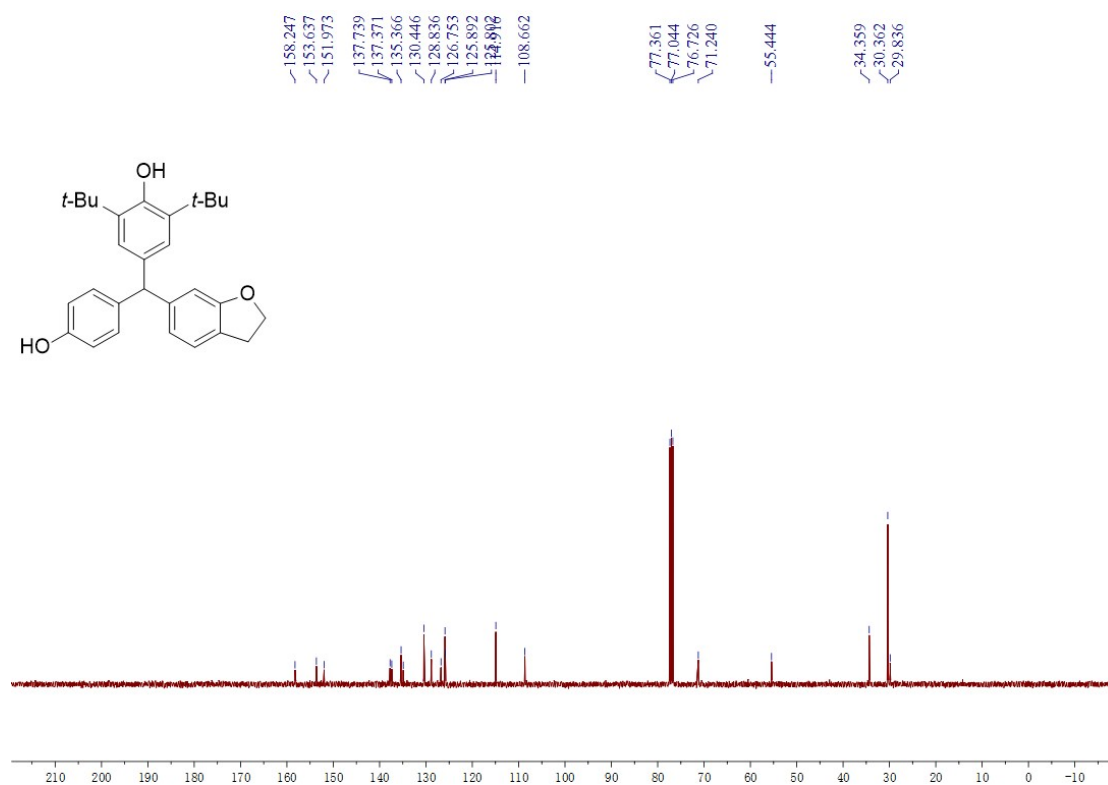

**4-((3,5-Di-*tert*-butyl-4-hydroxyphenyl)(4-hydroxyphenyl)methyl)benzaldehyde (7z)**

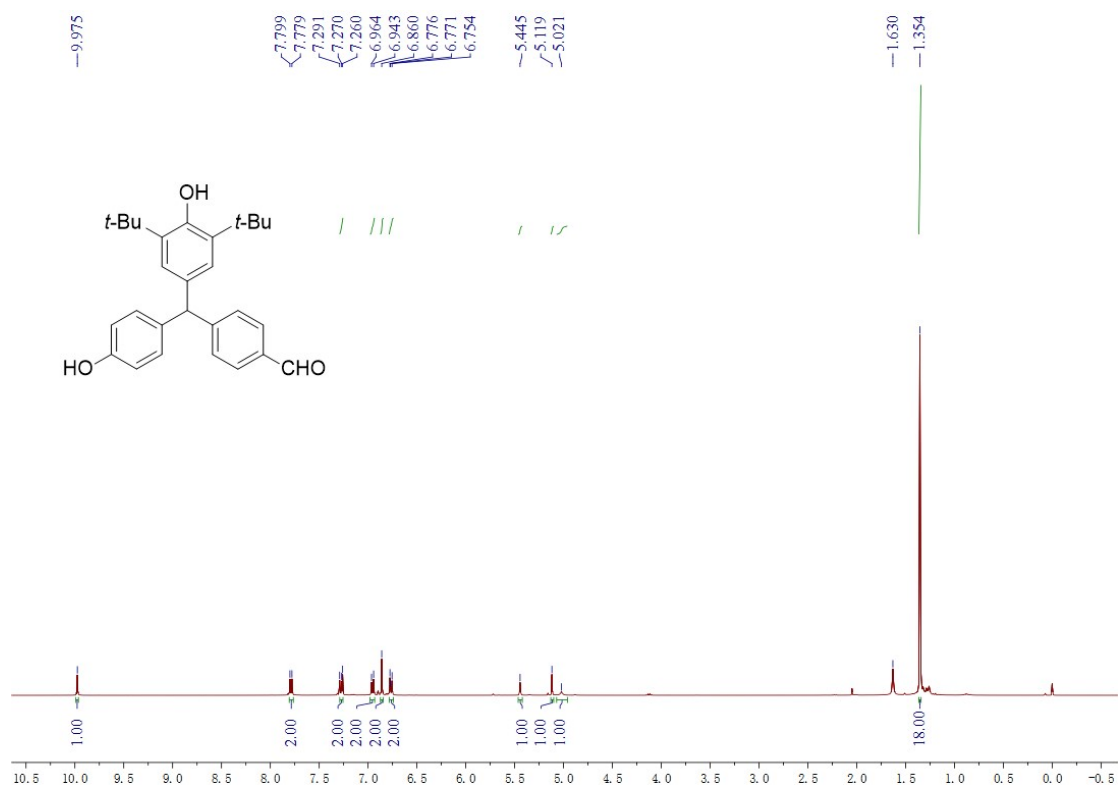

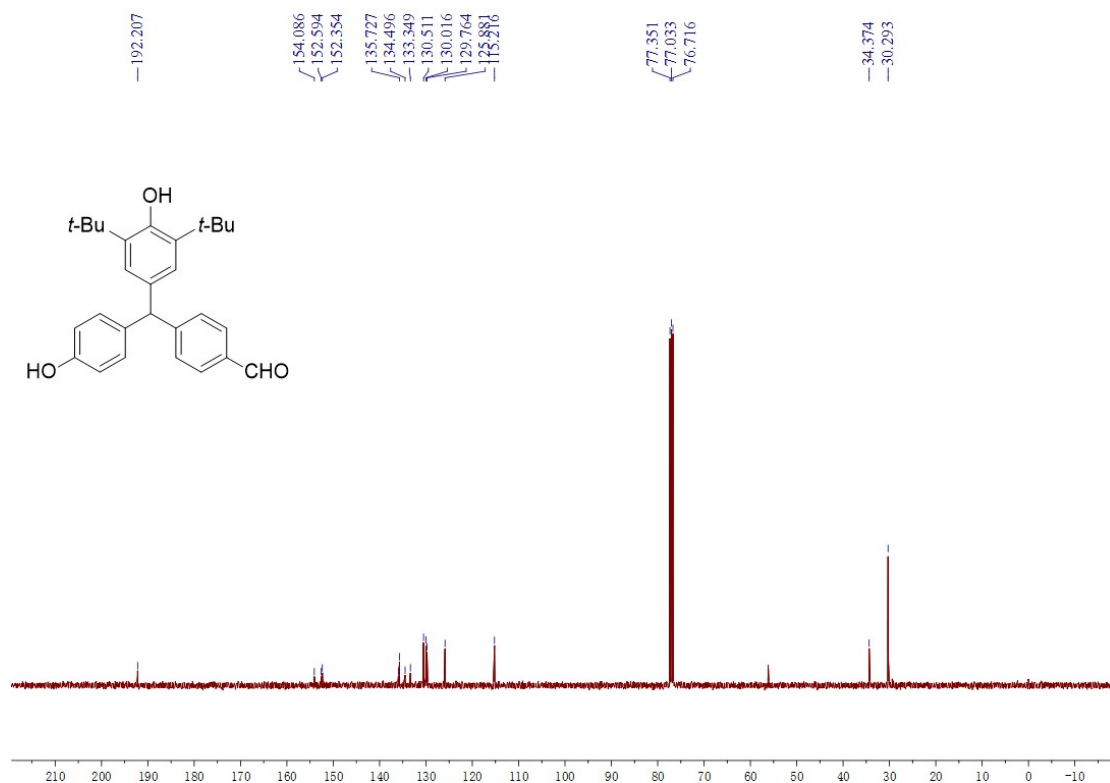

**4-((4-Hydroxyphenyl)(phenyl)methyl)-2,6-dimethylphenol (7ab)**

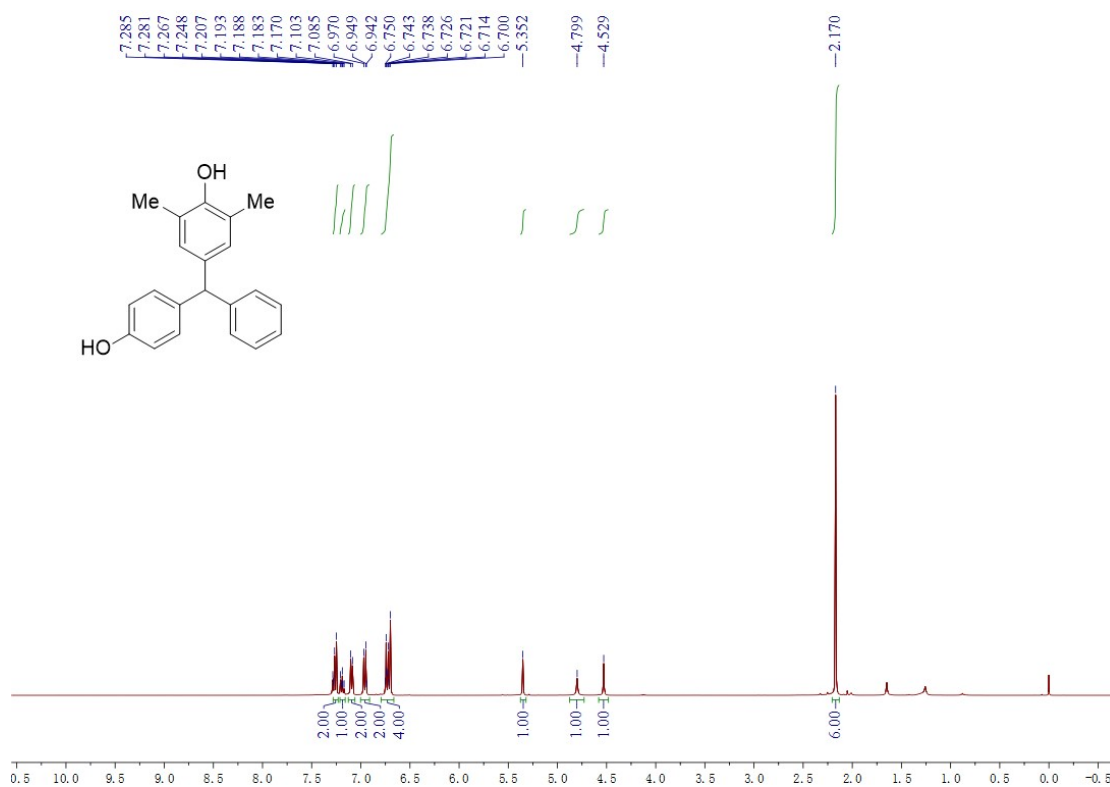

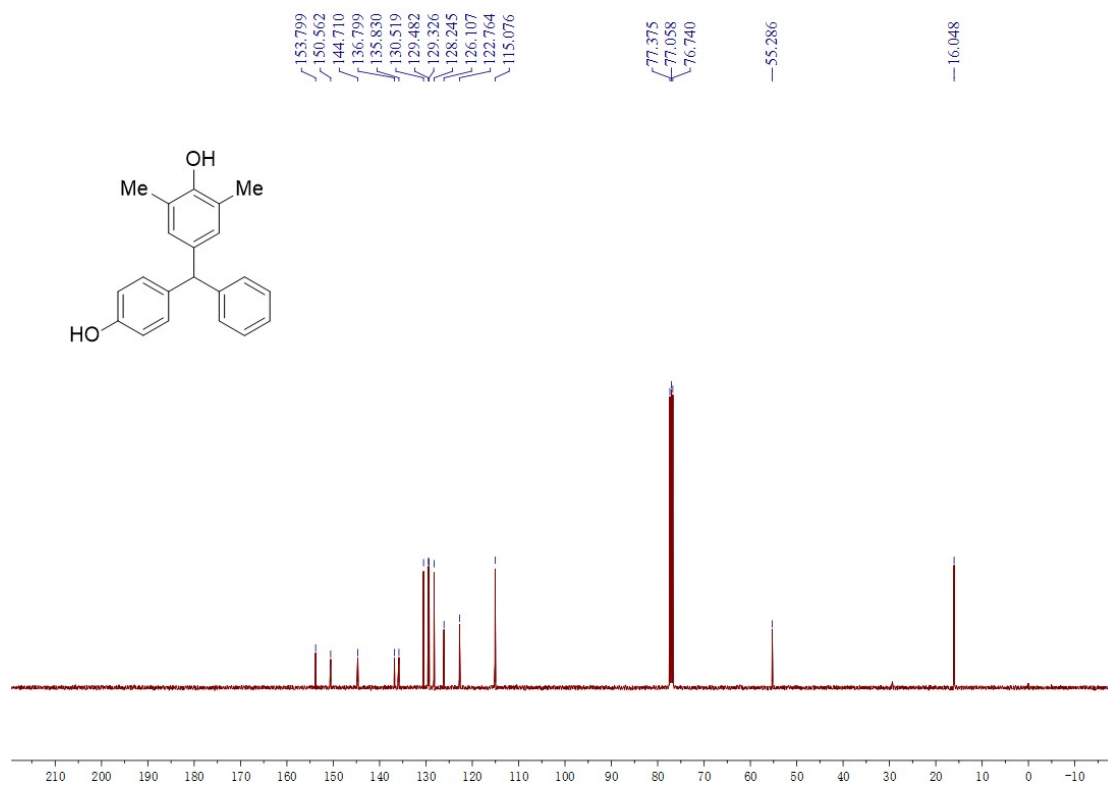

**4-((4-Hydroxyphenyl)(phenyl)methyl)-2,6-diisopropylphenol (7ac)**

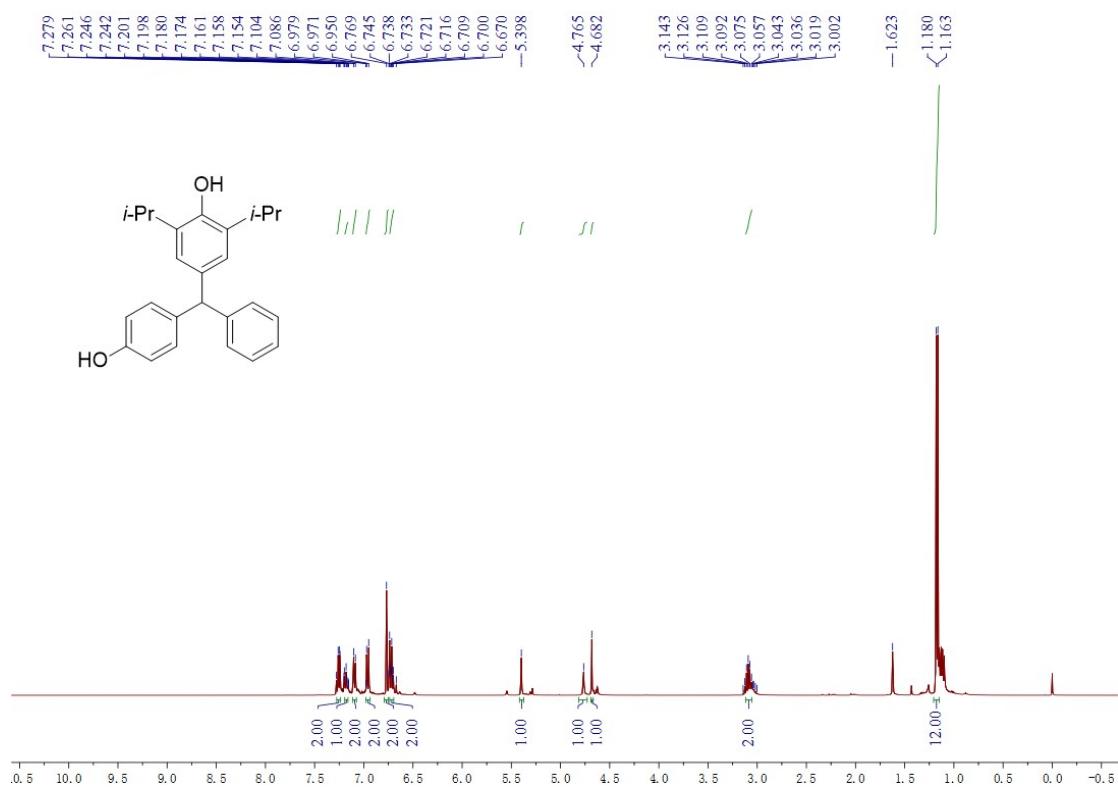

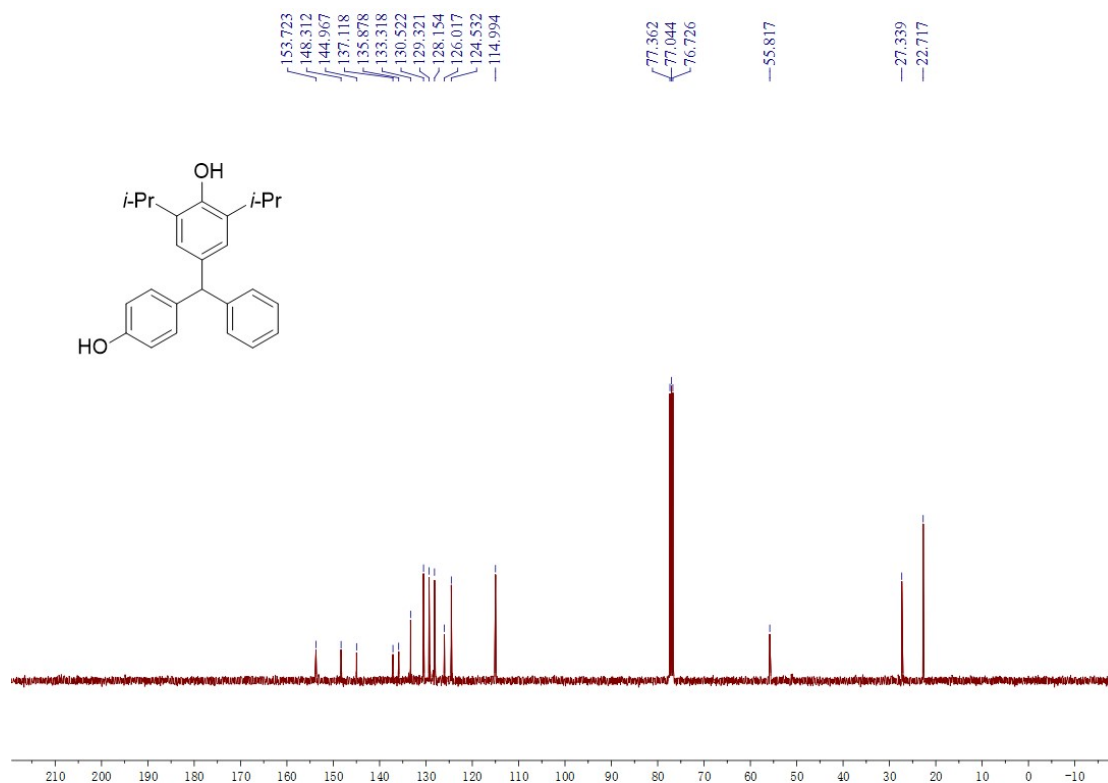

**5'-((4-Hydroxyphenyl)(phenyl)methyl)-[1,1':3',1''-terphenyl]-2'-ol (7ad)**

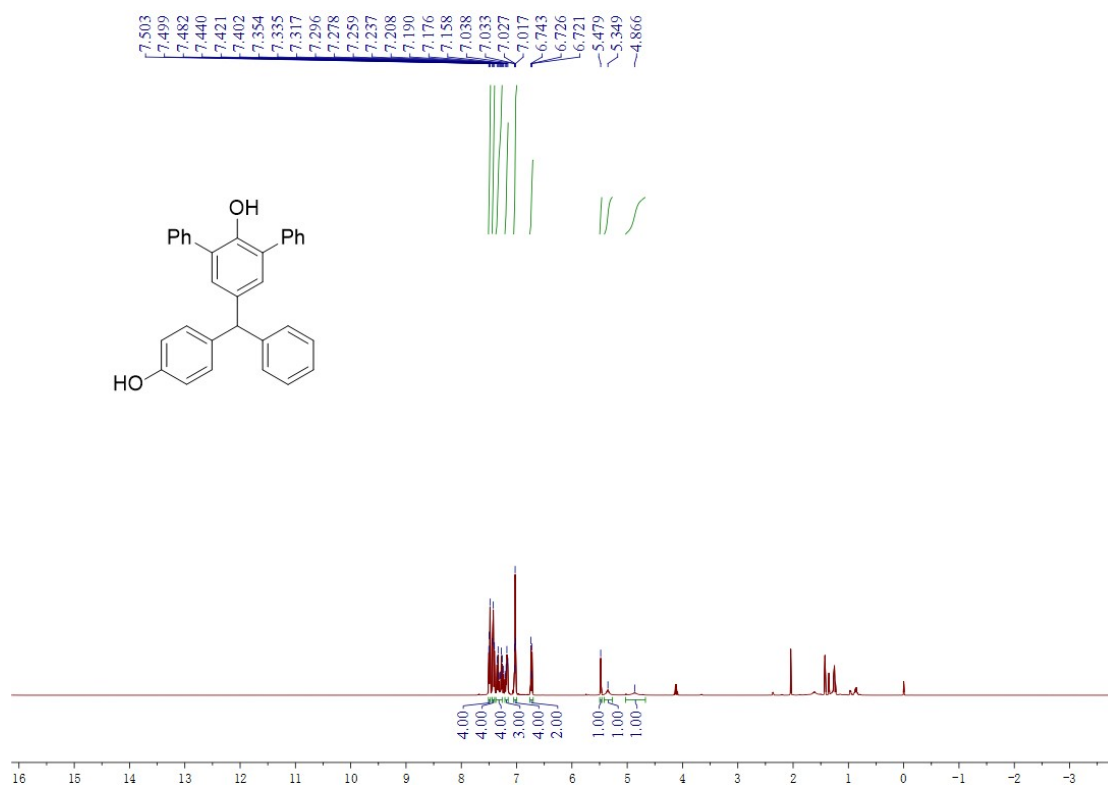

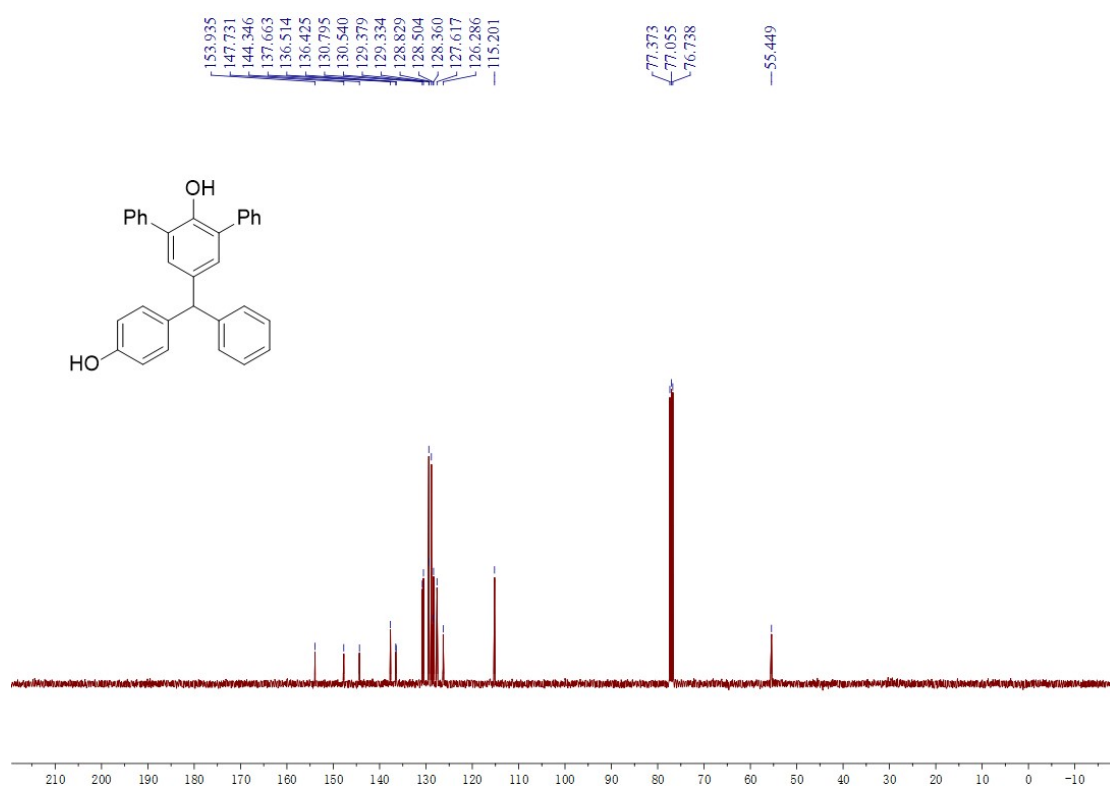

**4-((4-Aminophenyl)(phenyl)methyl)-2,6-di-tert-butylphenol (3a')**

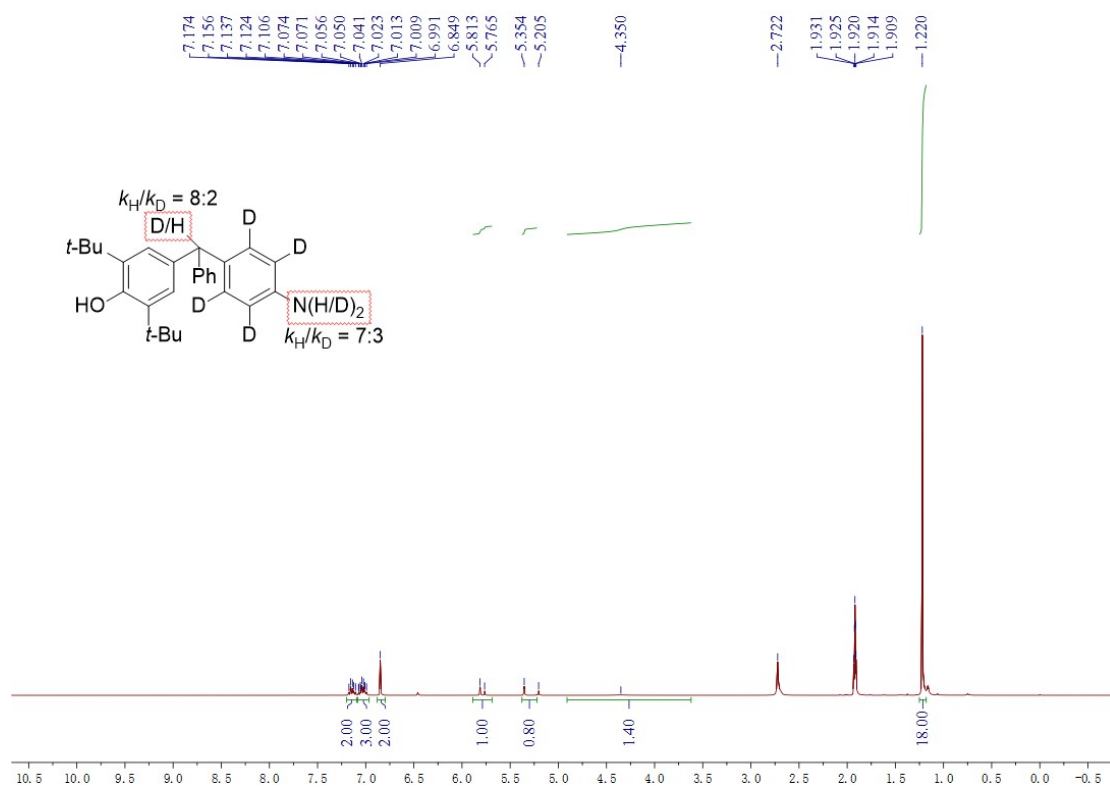





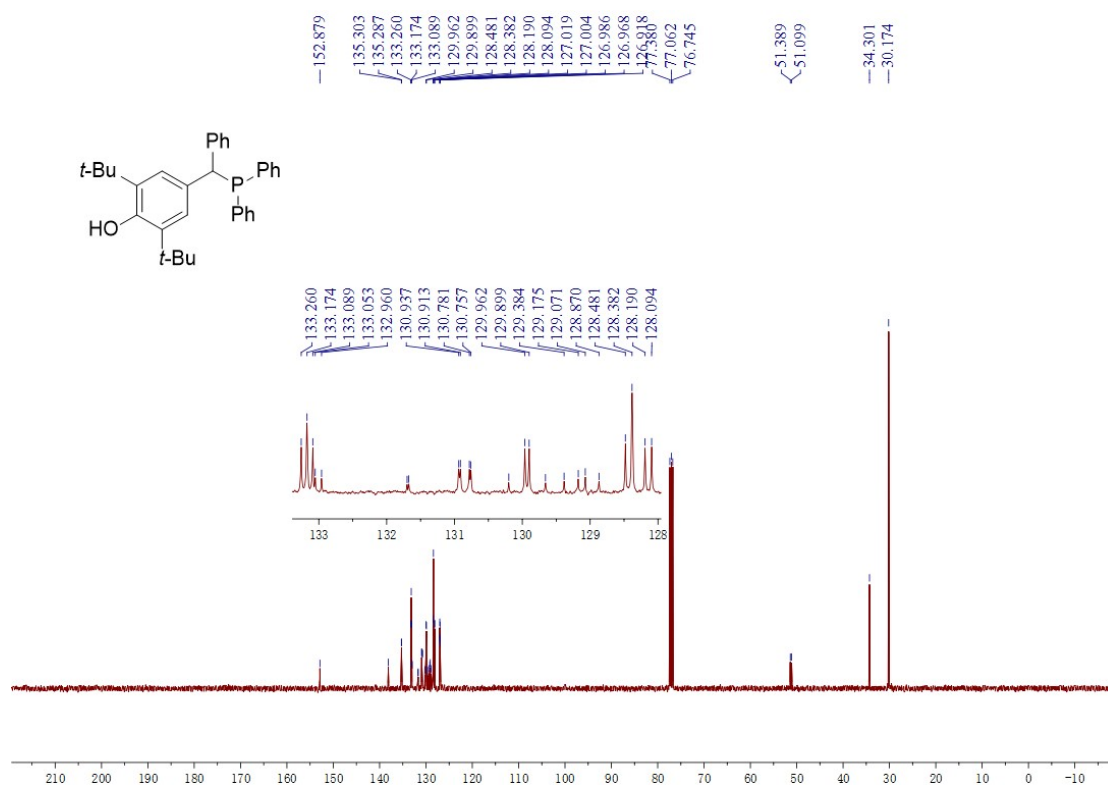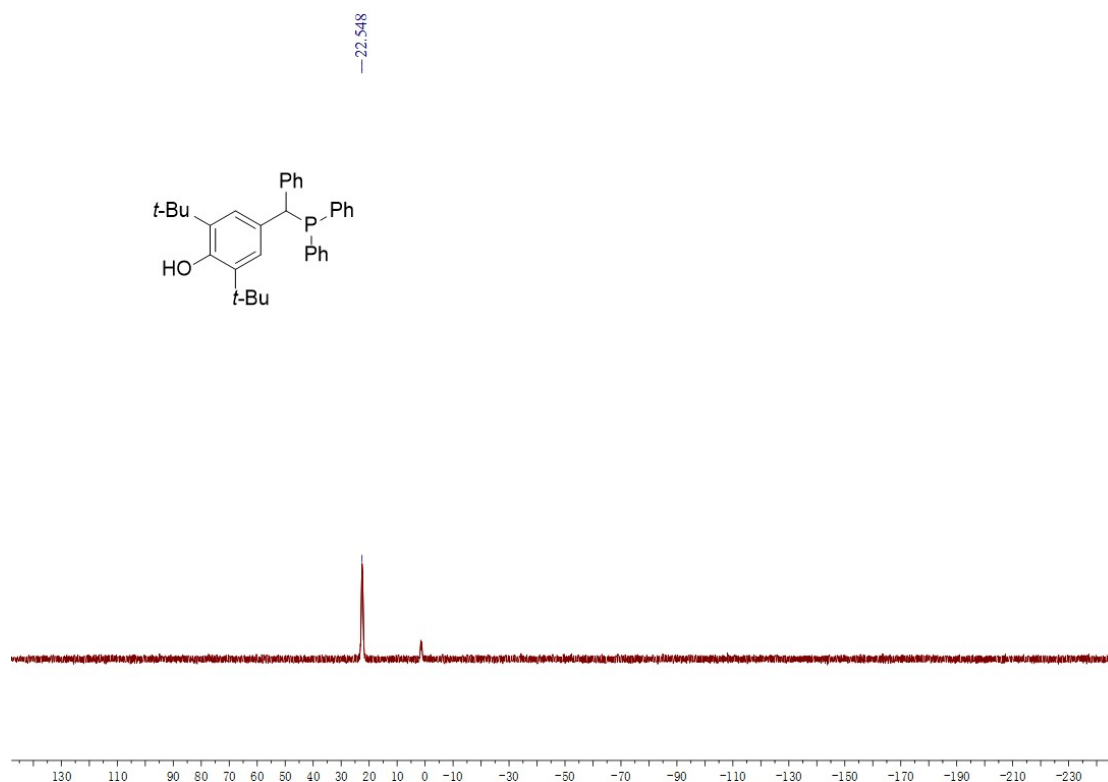

**2,6-Di-*tert*-butyl-4-((4-(diphenylphosphanyl)phenyl)(phenyl)methylene)cyclohexa-2,5-dien-1-one (9b)**

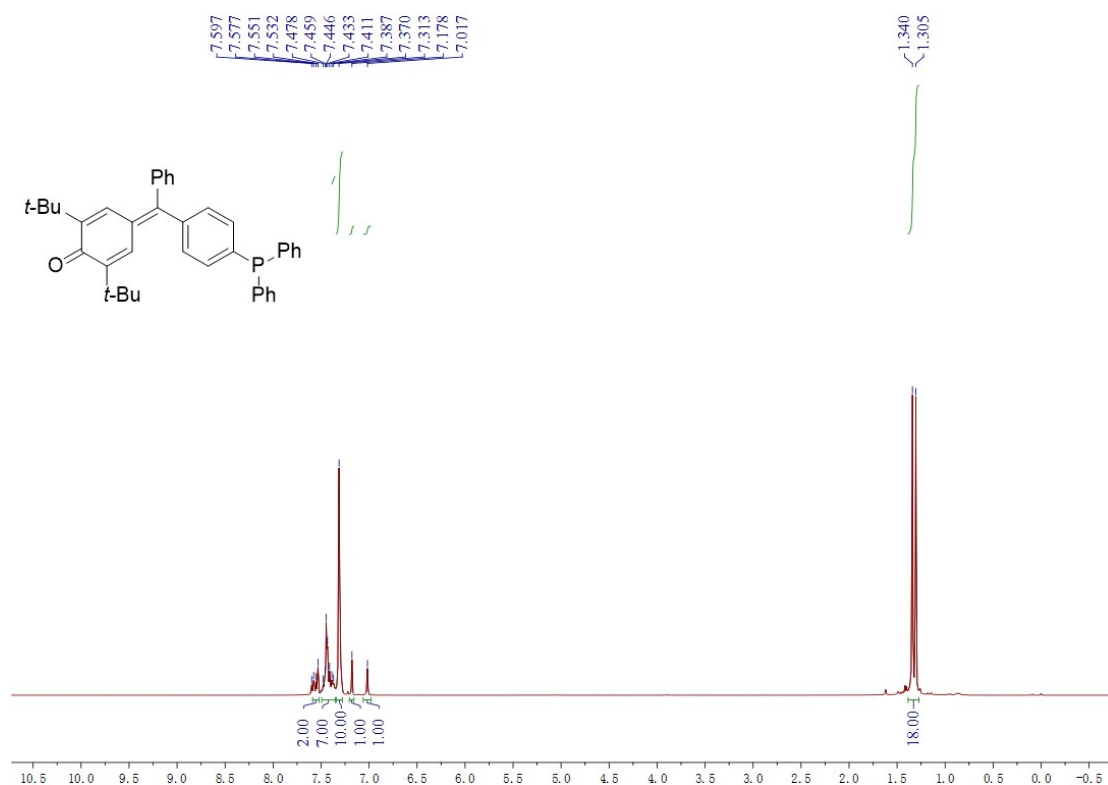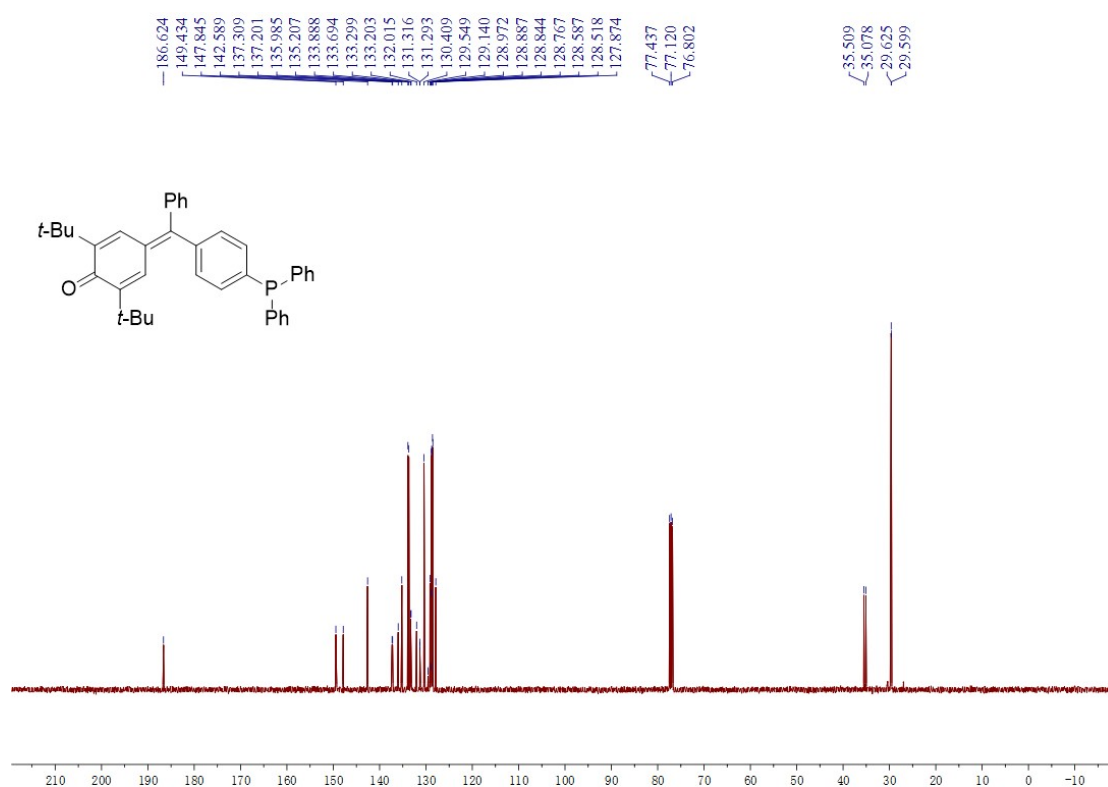

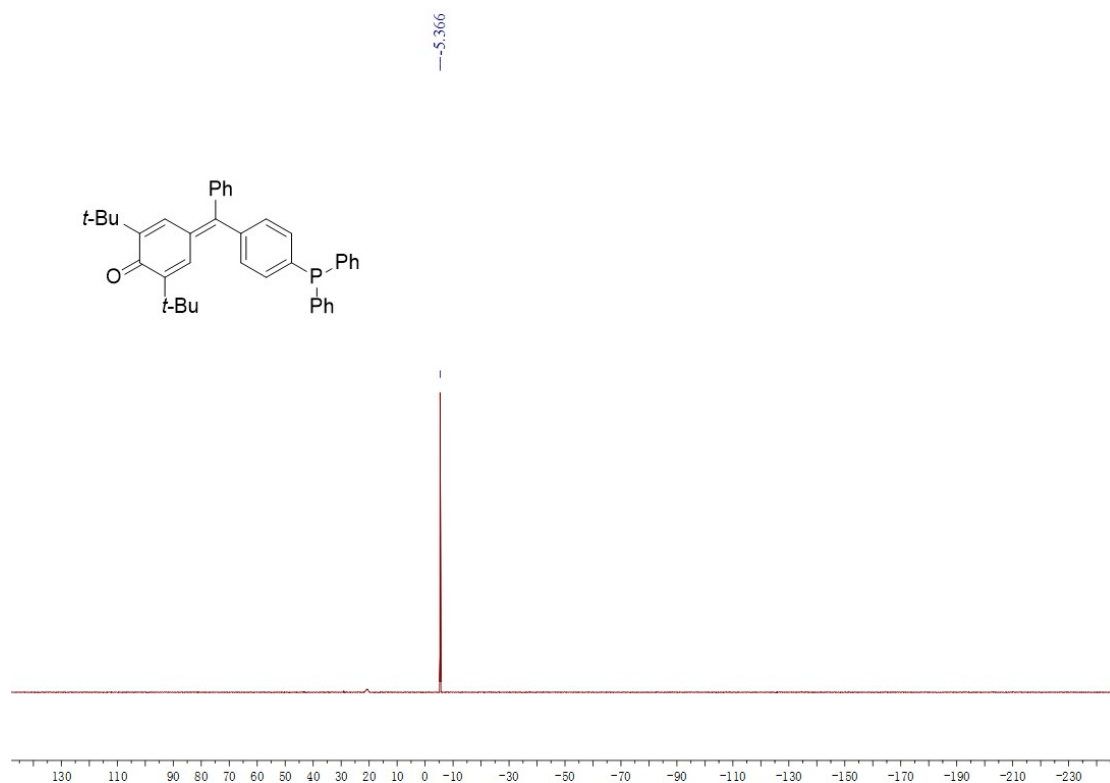

**2,6-Di-tert-butyl-4-(phenyl(phenylamino)methyl)phenol (3a'')**

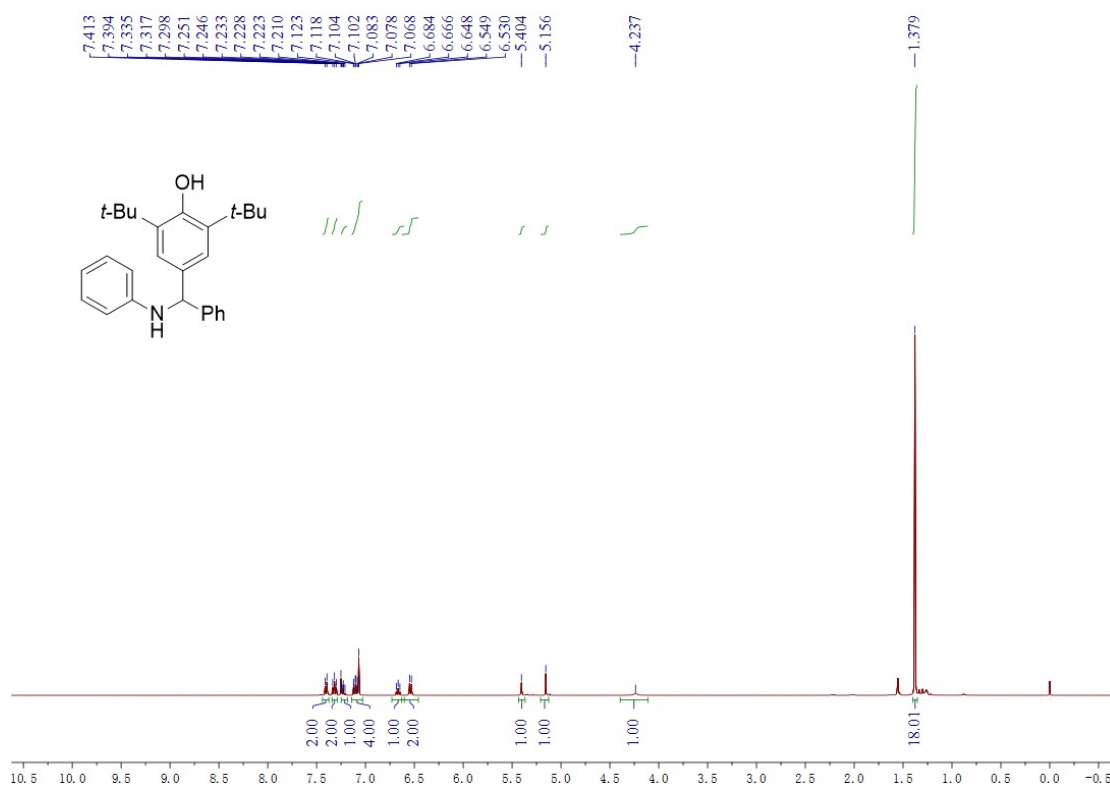

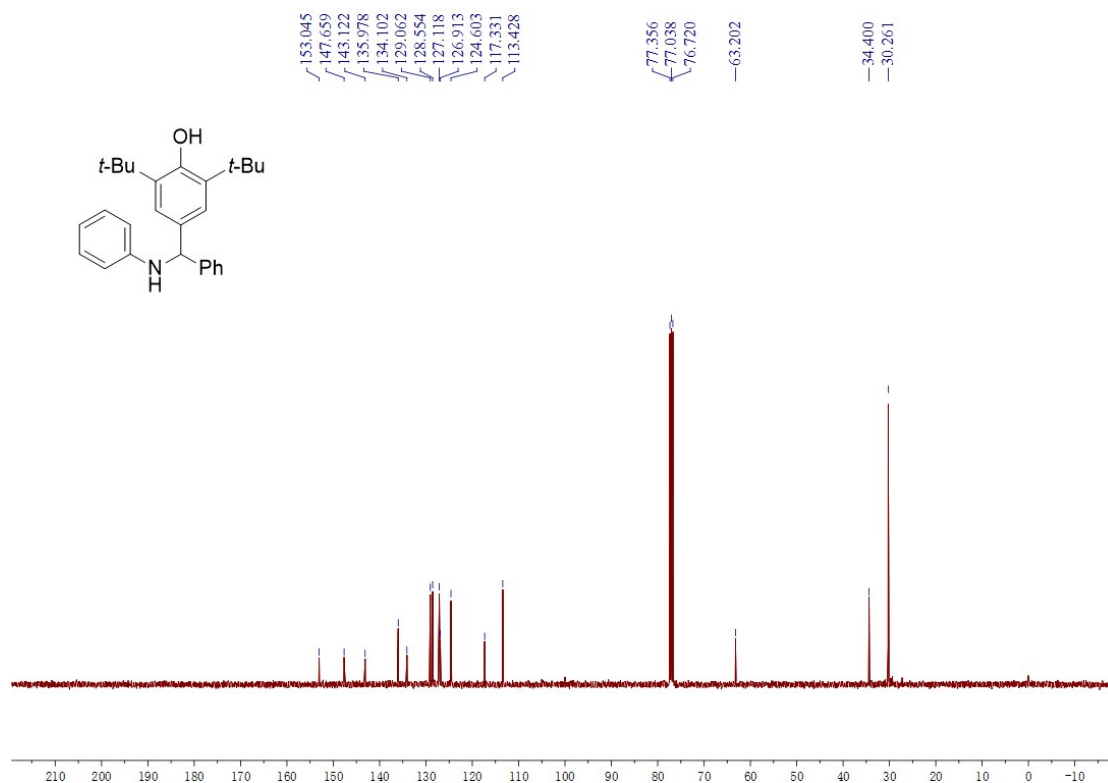

## Copies of HPLC spectra

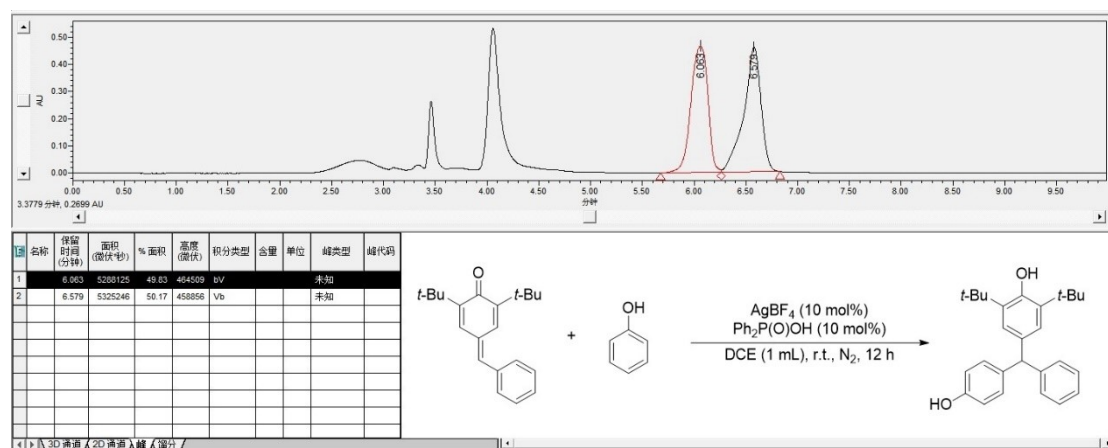

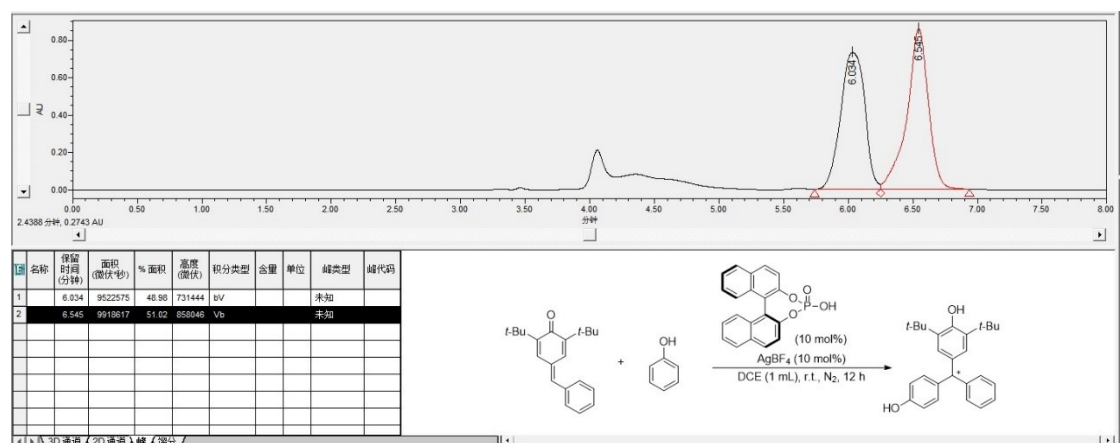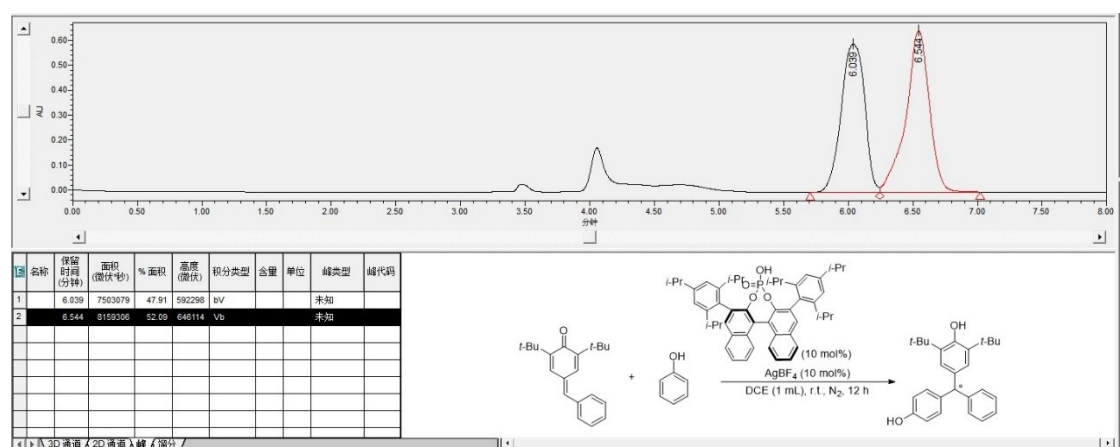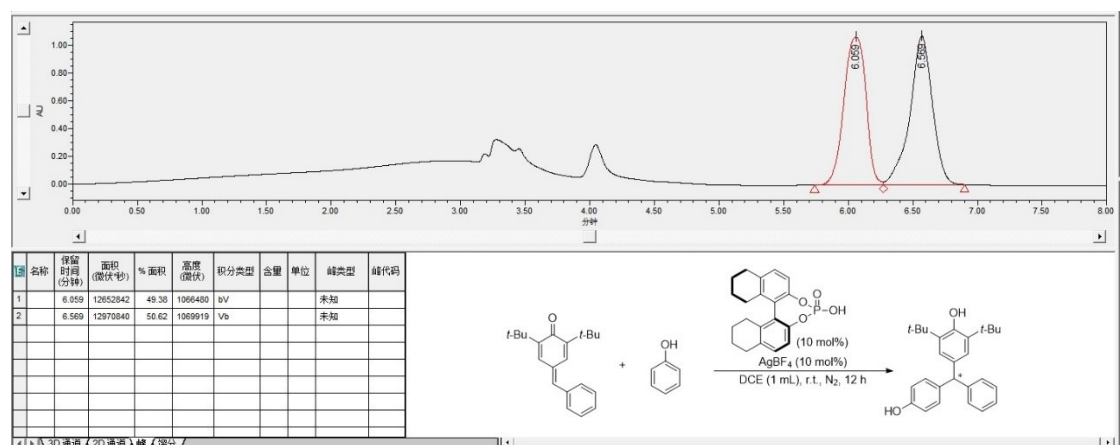

Supplement: d2qo00541g1.pdf [file d2qo00541g1.pdf]
